# Supplementary material for: Actionable human–water system modelling under uncertainty
Source: Copernicus journal article supplement (doi:10.5194/hess-28-4501-2024), 2024-10-14
Supplement: Supplementary file 1 [file hess-28-4501-2024-supplement.zip]

## Sheet: Hoja1
AWDU's	ID CROPS	CROPS	IRRIGATION	SURFACE	YIELD 2004	YIELD 2005	YIELD 2006	YIELD 2007	YIELD 2008	YIELD 2009	YIELD 2010	YIELD 2011	YIELD 2012	YIELD 2013	YIELD 2014	YIELD 2015	PRICE 2004	PRICE 2005	PRICE 2006	PRICE 2007	PRICE 2008	PRICE 2009	PRICE 2010	PRICE 2011	PRICE 2012	PRICE 2013	PRICE 2014	PRICE 2015	COST 2004	COST 2005	COST 2006	COST 2007	COST 2008	COST 2009	COST 2010	COST 2011	COST 2012	COST 2013	COST 2014	COST 2015	SUBSIDIES 2004	SUBSIDIES 2005	SUBSIDIES 2006	SUBSIDIES 2007	SUBSIDIES 2008	SUBSIDIES 2009	SUBSIDIES 2010	SUBSIDIES 2011	SUBSIDIES 2012
2000010	0101R	Trigo	R	791	6151.71	6151.71	6041.86	6481.27	6151.71	6041.86	6261.56	6206.64	6151.71	7030.53	6688.89	7030.53	0.162961	0.154143	0.147643	0.215924	0.219547	0.160616	0.174271	0.228528	0.249617	0.214031	0.21084	0.2024	643.264	697.832	1386.76	1441.08	711.583	789.605	884.144	949.243	1244.67	1466.51	1443.53	1634.9	273.003	259.901	0	0	43.3779	51.0002	0	0	0
2000010	0101S	Trigo (Secano)	S	82	2832.57	2430.94	2219.55	3593.56	4016.33	1796.78	3065.1	3012.25	3117.94	3382.17	2219.55	3170.79	0.162961	0.154143	0.147643	0.215924	0.219547	0.160616	0.174271	0.228528	0.249617	0.214031	0.21084	0.2024	300.381	251.748	406.629	512.746	540.645	253.446	356.615	414.19	533.964	622.535	389.761	550.619	166.336	159.51	48.9778	0	40.8705	42.7841	0	0	0
2000010	0102R	Cebada	R	188	6256.31	6314.34	6144.79	6601.1	6599.96	6373.51	6372.37	6315.48	5917.2	6258.58	5917.2	5803.41	0.145456	0.146635	0.133229	0.18851	0.170202	0.124946	0.150448	0.193469	0.224847	0.181234	0.163886	0.174	638.511	583.523	514.083	1354.7	643.023	747.561	899.246	944.33	1171.45	1295.99	1210.58	1361.93	286.109	241.572	57.5417	0	58.1515	65.4687	0	0	0
2000010	0102S	Cebada (Secano)	S	97	2776.57	2665.51	2607.88	3654.59	4377.55	1978.17	2933.73	3248.06	2671.79	3667.17	2305.08	2837.34	0.145456	0.146635	0.133229	0.18851	0.170202	0.124946	0.150448	0.193469	0.224847	0.181234	0.163886	0.174	326.562	296.857	300.178	589.544	666.917	283.997	373.927	489.116	488.888	679.52	417.697	529.083	176.321	154.474	41.8553	0	40.8404	46.9423	0	0	0
2000010	0103R	Avena	R	65	3784.05	3941.71	3678.93	4309.61	4519.83	3941.71	3889.16	4046.83	3784.05	3784.05	3573.82	3731.49	0.143959	0.156241	0.135667	0.16243	0.171606	0.12715	0.139837	0.18026	0.218604	0.167795	0.160668	0.1821	629.76	628.948	563.477	639.424	655.082	570.73	562.566	481.139	550.611	548.44	519.251	539.229	0	0	0	0	0	0	0	0	0
2000010	0103S	Avena (Secano)	S	7.7	2989.24	2693.73	2727.83	3750.76	4205.4	1193.42	2727.83	2727.83	2614.17	2614.17	2045.87	2159.53	0.143959	0.156241	0.135667	0.16243	0.171606	0.12715	0.139837	0.18026	0.218604	0.167795	0.160668	0.1821	730.322	293.708	298.994	816.969	505.322	135.8	369.551	443.469	552.994	563.144	436.304	446.909	0	149.517	19.8624	0	75.4525	50.389	0	0	0
2000010	0104S	Centeno (Secano)	S	0.7	2051.23	2051.23	1794.82	2487.11	2435.83	1410.22	1923.03	2307.63	1987.13	2307.63	2051.23	3076.84	0.143037	0.144979	0.135667	0.182657	0.160774	0.12204	0.146644	0.182346	0.220718	0.170001	0.152223	0.1638	242.29	262.953	215.921	509.56	429.761	245.919	273.856	400.912	452.312	518.564	486.754	733.781	171.967	153.702	38.824	0	91.4396	62.7433	0	0	0
2000010	0105S	Triticale (Secano)	S	1.6	2145.25	2621.97	2741.15	3098.69	3813.78	1906.89	3337.05	3337.05	3337.05	2502.79	2502.79	2502.79	0.156166	0.159443	0.147961	0.188715	0.185346	0.154804	0.174972	0.204791	0.22092	0.198886	0.181481	0.1764	419.914	492.064	493.8	540.747	650.118	324.739	567.734	563.301	492.651	298.107	353.574	412.697	0	0	0	0	0	0	0	0	0
2000010	0108R	Maiz	R	5676	11622.6	11501.5	11622.6	9927.65	10411.9	11501.5	12349	12591.2	11501.5	12228	11985.8	14407.2	0.16895	0.149064	0.160998	0.209968	0.182538	0.144484	0.18298	0.215418	0.234614	0.199488	0.170622	0.1729	1298.19	1257.4	1436.53	2020.84	1496.78	1617.69	1772.25	2195.88	2683.62	3017.14	2805.33	3628.39	460.553	512.118	117.076	0	115.45	115.838	0	0	0
2000010	0203S	Lentejas (Secano)	S	0	669.613	223.204	781.215	1116.02	1116.02	725.414	892.818	892.818	781.215	1227.62	732.11	558.011	0.5414	0.629713	0.644947	0.594483	0.609698	0.609097	0.718606	0.756694	0.800406	0.551626	0.464812	0.5955	308.451	185.52	326.091	862.545	842.565	547.128	469.838	528.731	528.11	1017.52	661.175	476.985	144.673	0	0	0	0	0	24.8945	99.5551	86.0419
2000010	0204S	Garbanzos (Secano)	S	3.2	715.766	596.471	1002.07	656.118	1073.65	775.413	954.354	715.766	715.766	1192.94	811.201	775.413	0.636873	0.574725	0.594708	0.649413	0.659244	0.672021	0.628918	0.64824	0.658732	0.667067	0.551682	0.5891	355.234	227.123	393.224	394.802	387.932	272.278	364.419	416.61	384.234	777.968	519.944	490.929	211.377	161.155	0	0	141.407	153.582	0	0	80.4031
2000010	0205R	Guisante seco	R	0.7	2061.41	1832.37	2175.93	2175.93	2175.93	2175.93	2061.41	2061.41	1946.89	2061.41	1717.84	1775.1	0.183	0.168498	0.164072	0.226191	0.218243	0.187869	0.2031	0.222072	0.268346	0.260067	0.255984	0.2289	329.353	308.063	356.519	451.392	440.936	379.593	519	413.652	396.083	417.729	348.967	358.65	354.829	263.037	125.174	0	0	167.83	55.1042	0	0
2000010	0205S	Guisantes secos (Secano)	S	10	908.211	681.158	794.684	749.274	1248.79	794.684	1021.74	1021.74	510.869	1135.26	624.395	681.158	0.183	0.168498	0.164072	0.226191	0.218243	0.187869	0.2031	0.222072	0.268346	0.260067	0.255984	0.2289	225.526	153.354	172.833	182.277	319.367	170.641	236.442	241.894	154.007	377.006	199.016	223.487	245.306	186.54	95.1786	0	118.359	112.431	50.6398	54.7533	0
2000010	0206R	Veza	R	6.6	1728.03	1728.03	1728.03	1749.63	1944.03	1836.03	1728.03	1728.03	1728.03	1620.03	1080.02	1134.02	0.200506	0.212333	0.194385	0.248677	0.290256	0.255703	0.240136	0.216113	0.265426	0.309312	0.347277	0.388	402.031	345.223	369.994	362.9	393.882	371.633	349.429	346.7	351.503	328.235	219.364	229.087	0	293.733	0	0	0	0	0	0	0
2000010	0206S	Veza (Secano)	S	53.3	739.27	211.22	739.27	686.465	1056.1	739.27	739.27	844.88	475.245	844.88	633.66	633.66	0.200506	0.212333	0.194385	0.248677	0.290256	0.255703	0.240136	0.216113	0.265426	0.309312	0.347277	0.388	164.741	52.1219	143.186	120.129	180.533	126.249	153.43	143.017	81.5615	144.427	108.588	108.001	205.665	183.017	0	0	0	0	0	0	0
2000010	0303R	Patata	R	3	51482.1	49991.5	56091.6	52777.4	51526.7	57415.7	50886.9	55994.6	54009.7	52052.4	62845.9	45759.5	0.255555	0.189698	0.283946	0.251141	0.226568	0.150295	0.259555	0.211247	0.248208	0.348929	0.174342	0.2281	3682.28	3865.09	4591.1	6929.76	4799.99	5451.68	4851.98	5703.24	6410.6	6370.28	7459.88	5667.55	0	0	0	0	0	0	0	0	0
2000010	0402R	Remolacha	R	178	90527.7	102647	106311	107762	110042	116472	119526	115802	115441	94276.4	102491	120851	0.0700215	0.0607298	0.0463174	0.0360386	0.0372097	0.0371731	0.0358352	0.0309868	0.034739	0.0341005	0.034587	0.0381	2307.07	2593.89	2738.39	4215.06	3077.99	3172.55	3419.56	3899.7	4617.49	3786.9	3880.3	5008.02	0	6.56986	223.5	0	485.09	1443.1	1288.7	1123.75	982.056
2000010	0409R	Girasol	R	212	2680.19	2447.13	2563.66	2563.66	2575.31	3018.13	3146.31	3379.37	2913.25	3262.84	2330.6	2447.13	0.264769	0.278805	0.234343	0.404844	0.388245	0.225644	0.365759	0.377503	0.503866	0.340705	0.308668	0.364	394.234	406.033	335.366	946.719	496.321	548.927	718.716	862.036	979.014	1204.69	906.169	1104.37	273.084	149.528	65.8937	0	50.0776	57.2425	0	0	0
2000010	0409S	Girasol (Secano)	S	22	720.292	463.045	823.191	823.191	926.089	637.973	823.191	1028.99	617.393	977.539	874.64	823.191	0.264769	0.278805	0.234343	0.404844	0.388245	0.225644	0.365759	0.377503	0.503866	0.340705	0.308668	0.364	131.505	80.5195	152.557	185.062	203.559	123.001	183.585	264.737	201.3	330.67	304.982	314.315	194.114	161.928	71.4688	0	63.5273	43.9063	0.650639	0	0
2000010	0421R	Colza	R	10.6	0	2176.66	4353.31	4190.06	4353.31	3047.32	3482.65	2938.49	3264.98	3482.65	3591.48	3373.82	0	0	0	0	0	0	0	0	0	0.336994	0.327772	0	0	1117.62	2145.6	2000.54	2030.34	1419.84	1621.07	1357.1	1528.78	1392.49	1422.43	1337.5	0	0	0	0	0	0	0	0	0
2000010	0421S	Colza (Secano)	S	13.4	1224.8	0	2449.59	2878.27	2939.51	918.597	3429.43	2204.63	1592.23	2572.07	2327.11	1837.19	0	0	0	0	0	0	0	0	0	0.336994	0.327772	0	729.869	0	1343.42	1529.13	1525.5	476.248	1776.24	1132.95	829.581	1071.94	876.471	704.316	0	0	0	0	0	0	0	0	0
2000010	0602R	Maíz forrajero	R	33.3	91154.8	88875.9	91154.8	71047.2	91154.8	96851.9	85457.6	85457.6	85457.6	68366.1	68366.1	74063.2	0.0413174	0.0364542	0.0393728	0.0513487	0.0446405	0.0353342	0.0447485	0.0526814	0.0573758	0.0487857	0.0478587	0.0318	3842.49	3591.94	3536.29	2670.01	3346.32	3551.96	3131	3106.55	3149.59	2149.59	1580.78	2169.59	0	0	0	0	0	0	0	0	0
2000010	0606R	Alfalfa	R	1424	48229.7	42870.8	48229.7	42870.8	51445	49301.4	49301.4	49301.4	42870.8	69129.2	34296.6	34296.6	0.136358	0.138243	0.117224	0.128445	0.167895	0.145286	0.116414	0.139242	0.167351	0.166491	0.148804	0.1513	560.775	583.05	623.628	734.312	930.657	1540.06	1096.7	835.32	874.497	1743.35	211.367	958.395	0	0	0	0	16.0774	19.829	0	0	0
2000010	0606S	Alfalfa (Secano)	S	91	15286.4	10190.9	20381.8	15286.4	25477.3	9681.36	18343.6	18343.6	10190.9	21910.4	18343.6	9171.81	0.136358	0.138243	0.117224	0.128445	0.167895	0.145286	0.116414	0.139242	0.167351	0.166491	0.148804	0.1513	299.053	191.147	366.963	266.613	236.809	94.5884	242.855	236.111	141.081	390.727	1195.59	170.276	0	0	0	0	107.286	100.508	0	0	0
2000010	0610R	Veza para forraje	R	9.1	26886.5	26886.5	21509.2	26886.5	32263.8	27962	26886.5	26886.5	21509.2	32371.4	18497.9	18820.6	0.12058	0.130403	0.109911	0.112223	0.12557	0.133963	0.0985969	0.103289	0.132008	0.12557	0.152524	0.1272	489.71	469.515	360.549	436.588	511.77	443.097	425.635	422.312	342.53	513.475	294.139	275.803	0	0	0	0	0	0	0	0	0
2000010	0610S	Veza para forraje (Secano)	S	45.3	15746.7	8398.23	14696.9	12597.3	17846.2	8398.23	15746.7	15746.7	7873.34	27084.3	12597.3	12597.3	0.12058	0.130403	0.109911	0.112223	0.12557	0.133963	0.0985969	0.103289	0.132008	0.12557	0.152524	0.1272	415.872	212.652	357.217	296.608	410.461	192.968	284.553	306.641	185.423	667.716	313.351	288.883	0	0	0	0	0	0	0	0	0
2000010	0701R	Col	R	5.6	47856.4	47856.4	49052.8	48454.6	52043.9	53359.9	52043.9	50249.3	48454.6	47856.4	45463.6	45463.6	0.290566	0.355545	0.318393	0.306995	0.300586	0.293176	0.250947	0.245312	0.304898	0.295672	0.271769	0.4429	4173.7	3109.71	3430.42	5270.49	4721.65	5095.34	5518.89	4852.83	3861.27	5034.67	4880.18	4816.36	0	0	0	0	0	0	0	0	0
2000010	0705R	Lechuga	R	1.5	38242.6	34936	33890.4	30756.2	30357.1	33406.4	34551.7	34551.7	33769.7	30715.5	27894.1	27894.1	0.370262	0.564456	0.417599	0.432874	0.491449	0.377642	0.468861	0.29795	0.442041	0.418534	0.335916	0.2512	2477.16	1831.28	3222.96	2676.32	2822.65	3409.66	3536.08	3688.97	2881.84	2610.87	2376.9	2364.05	0	0	0	0	0	0	0	0	0
2000010	0711R	Sandia	R	0	53333.3	53333.3	53333.3	56000	59333.3	53333.3	54666.7	46666.7	53333.3	50666.7	48000	48000	0.202463	0.218627	0.228832	0.24765	0.371897	0.231054	0.401795	0.241638	0.205413	0.272604	0.176353	0.2735	6807.02	6408.38	6460.5	15769.5	16321.1	8046.48	10498.5	6638.26	10033.3	9102.28	8954.52	5162.42	0	0	0	0	0	0	0	0	0
2000010	0717R	Tomate	R	6.4	21393.6	31784.8	26894.9	24449.9	22982.9	26039.1	33007.3	36430.3	37393.6	36674.8	36674.8	36674.8	0.474603	0.57627	0.394705	0.408232	0.373602	0.325039	0.378172	0.275008	0.302481	0.300486	0.291476	0.3256	2867.23	4084.22	3317.28	2921.37	2395.89	2762.72	4793.14	4184.86	4906.8	4775.72	4641.98	4267.93	0	0	0	0	0	0	765.352	0	0
2000010	0718R	Pimiento	R	19.2	19800	28235.3	23529.4	16470.6	25823.5	23529.4	26211.8	26235.3	25027.1	19176.5	15082.4	18823.5	0.994582	0.749295	0.732494	0.875194	0.850106	0.701278	0.838824	0.656881	0.615937	0.693745	0.654739	0.9148	5578.08	4767.87	4054.83	4136.77	7539.56	6910.3	6418.23	6373.83	6164.53	4704.82	3709.5	4604.61	0	0	0	0	0	0	0	0	0
2000010	0722R	Coliflor	R	4.4	39308.9	39308.9	42453.6	40432	40432	40993.5	43200.4	40656.6	40432	38522.7	39308.9	39308.9	0.397787	0.492022	0.494971	0.451663	0.376109	0.403593	0.547638	0.323077	0.416566	0.514016	0.386187	0.3787	4014.16	3387.23	4212.89	6089.17	4179.79	5189.72	6342.89	4050.5	4241.8	4816.88	5049.81	5765.84	0	0	0	0	0	0	0	0	0
2000010	0723R	Ajo	R	0.7	11956.5	12500	12282.6	9918.48	13587	13260.9	31847.8	12500	13043.5	12500	10869.6	13043.5	0.988823	1.13443	1.48269	1.35448	1.26403	1.20787	1.69567	1.86626	1.35089	1.17737	0.943399	1.3569	2938.07	2272.34	2923.44	4333.38	3961.61	3373.96	9358.51	4261.95	3969.46	6495.97	5386.62	5550.27	246.377	0	0	0	0	0	0	0	0
2000010	0724R	Cebolla	R	0.4	27535.1	29728.1	30451.4	22907.2	26877.8	27061.1	27641.4	27794.1	27757.5	27030.5	26877.8	26352.5	0.18634	0.175012	0.19873	0.251551	0.164084	0.139574	0.248044	0.173705	0.202694	0.263377	0.181481	0.2555	2245.08	2228.02	2653.94	1676.93	2615.55	2198.16	2395.37	2639.12	1992.78	3417.9	3433.58	3917.98	0	0	0	0	0	0	0	0	0
2000010	0732R	Guisantes verdes	R	0	10000	12000	12000	13000	0	0	0	0	0	0	0	0	0.6796	0.661623	0.695398	0.746235	0.73276	0.612003	0.680769	0.598284	0.60325	0.655633	0.615728	0.5243	1730.58	1991.06	1911.21	2005.71	0	0	0	0	0	0	0	0	0	0	0	0	0	0	0	0	0
2000010	1201R	Manzano	R	7.4	26344.3	25950.8	28064.8	24687.2	8815.59	24296.9	48471.9	44639	24646.6	39259.5	40892.2	46192	0.3622	0.279909	0.313305	0.388313	0.341306	0.261013	0.296591	0.302519	0.388573	0.418333	0.307462	0.3469	3390.24	2970.36	2723.33	12158.2	2036.19	5572.52	11309.2	9953.58	6438.3	11905.8	14316.3	11516.5	0	0	0	0	0	0	0	0	0
2000010	1202R	Peral	R	4.9	37739.1	35122	36944.2	36044.7	33357.8	40714.8	39259.3	41607.7	35749.3	37035.5	35950.1	35083.8	0.544509	0.432065	0.4247	0.635142	0.538588	0.477539	0.469161	0.394089	0.459763	0.572388	0.446815	0.5097	5156.1	4570.26	5402.24	21049.6	5533.87	8730.63	7091.14	9765.2	9110.14	9266.11	8407.07	7657.34	0	115.232	0	238.224	0	0	0	0	0
2000010	1218R	Almendro	R	0.4	0	3000	3900	3900	4000	4000	4000	4000	3100	3200	3200	3200	1.55314	1.60106	1.02979	0.91113	0.868761	0.617514	0.727415	0.6832	0.903617	1.49862	1.48392	1.8548	0	2373.57	2961.89	2869.24	410.499	857.325	2868.98	2846.58	2236.66	479.812	2305.39	2292.93	273.026	0	0	0	249.686	245.783	0	0	0
2000010	1302R	Vid	R	0	8246.27	8246.27	8530.45	6850.75	6850.75	7650	7167.91	8087.69	7358.21	6863.43	5328.36	6013.43	0.476906	0.557499	0.53334	0.563065	0.536381	0.568517	0.618308	0.596894	0.612917	0.619928	0.804649	0.7017	993.728	829.55	1212.96	191.736	1091.32	1019.9	1127.58	1645.44	1641.21	1926.99	1228.83	1289.56	0	0	0	0	0	56.1504	32.3418	0	6.49468
2000010	1302S	Vid (Secano)	S	3	3979.14	5435.16	4682.93	3399.16	3405.89	3700.59	3178.47	3902.44	3064.09	2973.93	2644.24	2864.93	0.476906	0.557499	0.53334	0.563065	0.536381	0.568517	0.618308	0.596894	0.612917	0.619928	0.804649	0.7017	1368.26	2343.2	2619.03	1850.84	951.95	1216.93	1257.88	1578.77	1495.71	1435.89	1361.55	1606.94	0	0	0	0	0	0	0	0	0
2000001	0101R	Trigo	R	81	4613.78	4613.78	4531.39	4860.95	4613.78	4531.39	4696.17	4654.98	4613.78	5272.89	5016.66	5272.89	0.162961	0.154143	0.147643	0.215924	0.219547	0.160616	0.174271	0.228528	0.249617	0.214031	0.21084	0.2024	482.448	523.374	780.052	810.608	533.687	592.204	663.108	711.933	933.504	1099.88	1082.64	1226.17	273.003	259.901	0	0	43.3779	51.0002	0	0	0
2000001	0101S	Trigo (Secano)	S	31	2124.43	1823.2	1664.66	2695.17	3012.25	1347.59	2298.82	2259.19	2338.46	2536.63	1664.66	2378.09	0.162961	0.154143	0.147643	0.215924	0.219547	0.160616	0.174271	0.228528	0.249617	0.214031	0.21084	0.2024	225.286	188.811	304.972	288.419	405.484	190.085	267.461	310.643	400.473	466.901	292.321	412.964	166.336	159.51	48.9778	0	40.8705	42.7841	0	0	0
2000001	0102R	Cebada	R	6	4692.23	4735.75	4608.59	4950.82	4949.97	4780.13	4779.28	4736.61	4437.9	4693.94	4437.9	4352.56	0.145456	0.146635	0.133229	0.18851	0.170202	0.124946	0.150448	0.193469	0.224847	0.181234	0.163886	0.174	478.883	437.642	385.562	762.018	482.267	560.671	674.435	708.247	878.589	971.994	907.933	1021.45	286.109	241.572	57.5417	0	58.1515	65.4687	0	0	0
2000001	0102S	Cebada (Secano)	S	4	2082.43	1999.13	1955.91	2740.94	3283.16	1483.63	2200.3	2436.05	2003.84	2750.37	1728.81	2128	0.145456	0.146635	0.133229	0.18851	0.170202	0.124946	0.150448	0.193469	0.224847	0.181234	0.163886	0.174	244.922	222.643	225.134	331.619	500.188	212.997	280.445	366.837	366.666	509.64	313.273	396.813	176.321	154.474	41.8553	0	40.8404	46.9423	0	0	0
2000001	0103R	Avena	R	49.4	2838.03	2956.29	2759.2	3232.21	3389.87	2956.29	2916.87	3035.12	2838.03	2838.03	2680.37	2798.62	0.143959	0.156241	0.135667	0.16243	0.171606	0.12715	0.139837	0.18026	0.218604	0.167795	0.160668	0.1821	354.24	353.783	316.956	359.676	368.483	321.035	316.443	360.854	309.719	308.498	292.079	303.316	0	0	0	0	0	0	0	0	0
2000001	0103S	Avena (Secano)	S	13.5	2241.93	2020.3	2045.87	2813.07	3154.05	895.068	2045.87	2045.87	1960.63	1960.63	1534.4	1619.65	0.143959	0.156241	0.135667	0.16243	0.171606	0.12715	0.139837	0.18026	0.218604	0.167795	0.160668	0.1821	410.806	220.281	224.246	459.545	378.991	101.85	277.163	332.601	414.745	422.358	327.228	335.182	0	149.517	19.8624	0	75.4525	50.389	0	0	0
2000001	0104R	Centeno	R	0.3	2140.47	0	0	2604.24	2541.81	1962.1	2229.66	2497.22	2140.47	2318.84	2229.66	2586.4	0.143037	0.144979	0.135667	0.182657	0.160774	0.12204	0.146644	0.182346	0.220718	0.170001	0.152223	0.1638	337.537	0	0	366.122	349.068	269.191	407.293	339.596	295.115	318.448	306.956	354.145	0	0	0	0	0	0	0	0	0
2000001	0104S	Centeno (Secano)	S	1.2	1538.42	1538.42	1346.12	1865.34	1826.88	1057.66	1442.27	1730.72	1490.35	1730.72	1538.42	2307.63	0.143037	0.144979	0.135667	0.182657	0.160774	0.12204	0.146644	0.182346	0.220718	0.170001	0.152223	0.1638	181.717	197.215	161.941	286.627	322.321	184.439	205.392	300.684	339.234	388.923	365.066	550.336	171.967	153.702	38.824	0	91.4396	62.7433	0	0	0
2000001	0105S	Triticale (Secano)	S	6.3	1608.94	1966.48	2055.86	2324.02	2860.33	1430.17	2502.79	2502.79	2502.79	1877.09	1877.09	1877.09	0.156166	0.159443	0.147961	0.188715	0.185346	0.154804	0.174972	0.204791	0.22092	0.198886	0.181481	0.1764	236.202	276.786	277.762	304.17	365.691	182.666	319.35	316.857	369.488	223.58	265.18	309.523	0	0	0	0	0	0	0	0	0
2000001	0108R	Maiz	R	600	8716.96	8626.16	8716.96	7445.74	7808.94	8626.16	9261.77	9443.37	8626.16	9170.97	8989.36	10805.4	0.16895	0.149064	0.160998	0.209968	0.182538	0.144484	0.18298	0.215418	0.234614	0.199488	0.170622	0.1729	973.64	943.054	1077.4	1136.72	1122.59	1213.27	1329.19	1646.91	2012.72	2262.85	2104	2721.29	460.553	512.118	117.076	0	115.45	115.838	0	0	0
2000001	0203S	Lentejas (Secano)	S	0	502.21	167.403	585.912	837.017	837.017	544.061	669.613	669.613	585.912	920.718	549.083	418.508	0.5414	0.629713	0.644947	0.594483	0.609698	0.609097	0.718606	0.756694	0.800406	0.551626	0.464812	0.5955	231.338	104.355	244.568	485.182	473.943	307.759	352.379	396.548	396.083	763.137	495.882	357.739	144.673	0	0	0	0	0	24.8945	99.5551	86.0419
2000001	0204S	Garbanzos (Secano)	S	0.6	536.824	447.353	751.554	492.089	805.236	581.559	715.766	536.824	536.824	894.707	608.401	581.559	0.636873	0.574725	0.594708	0.649413	0.659244	0.672021	0.628918	0.64824	0.658732	0.667067	0.551682	0.5891	266.425	170.342	294.918	222.076	290.949	204.209	273.314	234.343	288.176	583.476	389.958	368.197	211.377	161.155	0	0	141.407	153.582	0	0	80.4031
2000001	0205S	Guisantes secos (Secano)	S	1	681.158	510.869	596.013	561.955	936.592	596.013	766.303	766.303	383.151	851.448	468.296	510.869	0.183	0.168498	0.164072	0.226191	0.218243	0.187869	0.2031	0.222072	0.268346	0.260067	0.255984	0.2289	169.145	115.016	129.625	102.531	239.525	127.981	177.331	181.42	115.505	282.754	149.262	167.615	245.306	186.54	95.1786	0	118.359	112.431	50.6398	54.7533	0
2000001	0206R	Veza	R	5.9	1296.02	1296.02	1296.02	1312.22	1458.02	1377.02	1296.02	1296.02	1296.02	1215.02	810.014	850.514	0.200506	0.212333	0.194385	0.248677	0.290256	0.255703	0.240136	0.216113	0.265426	0.309312	0.347277	0.388	226.142	258.917	208.122	204.131	221.559	209.044	196.554	195.019	197.721	184.632	123.392	128.861	0	293.733	0	0	0	0	0	0	0
2000001	0206S	Veza (Secano)	S	7.6	554.452	158.415	554.452	514.849	792.075	554.452	554.452	633.66	356.434	633.66	475.245	475.245	0.200506	0.212333	0.194385	0.248677	0.290256	0.255703	0.240136	0.216113	0.265426	0.309312	0.347277	0.388	123.555	39.0915	107.389	67.5727	101.55	71.015	115.073	80.447	45.8784	81.24	61.0805	60.7503	205.665	183.017	0	0	0	0	0	0	0
2000001	0303R	Patata	R	2	38611.6	37493.6	42068.7	39583	38645	43061.8	38165.2	41995.9	40507.3	39039.3	47134.4	34319.6	0.255555	0.189698	0.283946	0.251141	0.226568	0.150295	0.259555	0.211247	0.248208	0.348929	0.174342	0.2281	2761.71	2898.82	3443.32	3897.99	3599.99	4088.76	3638.98	4277.43	4807.95	4777.71	5594.91	4250.66	0	0	0	0	0	0	0	0	0
2000001	0402R	Remolacha	R	2	67895.8	76985.4	79733.4	80821.8	82531.1	87353.8	89644.5	86851.4	86581	70707.3	76868.5	90638.1	0.0700215	0.0607298	0.0463174	0.0360386	0.0372097	0.0371731	0.0358352	0.0309868	0.034739	0.0341005	0.034587	0.0381	1730.3	1945.42	2053.8	2370.97	2308.49	2379.41	2564.67	2924.77	3463.12	2840.18	2910.22	3756.02	0	6.56986	223.5	0	485.09	1443.1	1288.7	1123.75	982.056
2000001	0409R	Girasol	R	9	2010.14	1835.35	1922.74	1922.74	1931.48	2263.59	2359.73	2534.53	2184.94	2447.13	1747.95	1835.35	0.264769	0.278805	0.234343	0.404844	0.388245	0.225644	0.365759	0.377503	0.503866	0.340705	0.308668	0.364	295.676	304.525	251.525	532.529	372.241	411.695	539.037	646.527	734.261	903.514	679.627	828.277	273.084	149.528	65.8937	0	50.0776	57.2425	0	0	0
2000001	0409S	Girasol (Secano)	S	0.3	540.219	347.284	617.393	617.393	694.567	478.48	617.393	771.741	463.045	733.154	655.98	617.393	0.264769	0.278805	0.234343	0.404844	0.388245	0.225644	0.365759	0.377503	0.503866	0.340705	0.308668	0.364	98.6291	60.3896	114.418	104.098	152.669	92.2509	137.689	198.553	150.975	248.002	228.736	235.737	194.114	161.928	71.4688	0	63.5273	43.9063	0.650639	0	0
2000001	0602R	Maíz forrajero	R	13.4	68366.1	66656.9	68366.1	53285.4	68366.1	72638.9	64093.2	64093.2	64093.2	51274.5	51274.5	55547.4	0.0413174	0.0364542	0.0393728	0.0513487	0.0446405	0.0353342	0.0447485	0.0526814	0.0573758	0.0487857	0.0478587	0.0318	2161.4	2020.46	1989.16	1501.88	1882.3	1997.98	1761.19	1747.44	1771.65	1612.19	1185.59	1627.19	0	0	0	0	0	0	0	0	0
2000001	0606R	Alfalfa	R	293	36172.2	32153.1	36172.2	32153.1	38583.7	36976.1	36976.1	36976.1	32153.1	51846.9	25722.5	25722.5	0.136358	0.138243	0.117224	0.128445	0.167895	0.145286	0.116414	0.139242	0.167351	0.166491	0.148804	0.1513	420.581	437.288	467.721	413.05	697.993	1155.05	822.523	626.49	655.873	1307.51	158.526	718.796	0	0	0	0	16.0774	19.829	0	0	0
2000001	0606S	Alfalfa (Secano)	S	7	11464.8	7643.18	15286.4	11464.8	19107.9	7261.02	13757.7	13757.7	7643.18	16432.8	13757.7	6878.86	0.136358	0.138243	0.117224	0.128445	0.167895	0.145286	0.116414	0.139242	0.167351	0.166491	0.148804	0.1513	168.217	107.52	206.416	149.97	177.607	70.9413	182.141	177.083	105.81	293.045	896.691	127.707	0	0	0	0	107.286	100.508	0	0	0
2000001	0610R	Veza para forraje	R	1	20164.9	20164.9	16131.9	20164.9	24197.9	20971.5	20164.9	20164.9	16131.9	24278.5	13873.4	14115.4	0.12058	0.130403	0.109911	0.112223	0.12557	0.133963	0.0985969	0.103289	0.132008	0.12557	0.152524	0.1272	275.462	264.102	202.809	245.581	287.87	249.242	239.42	237.55	192.673	288.83	165.453	206.852	0	0	0	0	0	0	0	0	0
2000001	0610S	Veza para forraje (Secano)	S	2.5	11810	6298.67	11022.7	9448.01	13384.7	6298.67	11810	11810	5905	20313.2	9448.01	9448.01	0.12058	0.130403	0.109911	0.112223	0.12557	0.133963	0.0985969	0.103289	0.132008	0.12557	0.152524	0.1272	233.928	119.617	200.934	166.842	230.884	108.544	213.415	229.981	139.067	500.787	235.013	162.497	0	0	0	0	0	0	0	0	0
2000001	0701R	Col	R	0.4	35892.3	35892.3	36789.6	36341	39032.9	40019.9	39032.9	37686.9	36341	35892.3	34097.7	34097.7	0.290566	0.355545	0.318393	0.306995	0.300586	0.293176	0.250947	0.245312	0.304898	0.295672	0.271769	0.4429	3130.27	2332.28	2572.82	2964.65	3541.24	3821.51	3104.38	3639.63	2895.95	3776	3660.14	2709.2	0	0	0	0	0	0	0	0	0
2000001	0711R	Sandia	R	0	40000	40000	40000	42000	44500	40000	41000	35000	40000	38000	36000	36000	0.202463	0.218627	0.228832	0.24765	0.371897	0.231054	0.401795	0.241638	0.205413	0.272604	0.176353	0.2735	5105.26	4806.29	4845.38	8870.33	9180.63	6034.86	7873.88	4978.69	7524.95	6826.71	6715.89	3871.81	0	0	0	0	0	0	0	0	0
2000001	0717R	Tomate	R	0.8	16045.2	23838.6	20171.1	18337.4	17237.2	19529.3	24755.5	27322.7	28045.2	27506.1	27506.1	27506.1	0.474603	0.57627	0.394705	0.408232	0.373602	0.325039	0.378172	0.275008	0.302481	0.300486	0.291476	0.3256	1612.82	2297.37	1865.97	1643.27	1796.92	2072.04	3594.86	3138.64	3680.1	3581.79	3481.48	2400.71	0	0	0	0	0	0	765.352	0	0
2000001	0718R	Pimiento	R	0.4	14850	21176.5	17647.1	12352.9	19367.6	17647.1	19658.8	19676.5	18770.3	14382.4	11311.8	14117.6	0.994582	0.749295	0.732494	0.875194	0.850106	0.701278	0.838824	0.656881	0.615937	0.693745	0.654739	0.9148	3137.67	3575.91	3041.12	2326.94	5654.67	5182.73	3610.25	3585.28	3467.55	2646.46	2086.59	2590.09	0	0	0	0	0	0	0	0	0
2000001	0723R	Ajo	R	0	8967.39	9375	9211.96	7438.86	10190.2	9945.65	23885.9	9375	9782.61	9375	8152.17	9782.61	0.988823	1.13443	1.48269	1.35448	1.26403	1.20787	1.69567	1.86626	1.35089	1.17737	0.943399	1.3569	2203.55	1704.26	2192.58	2437.52	2971.21	2530.47	7018.88	3196.46	2977.09	4871.98	4039.97	3122.03	246.377	0	0	0	0	0	0	0	0
2000001	0724R	Cebolla	R	0	20651.3	22296.1	22838.5	17180.4	20158.4	20295.8	20731.1	20845.6	20818.1	20272.9	20158.4	19764.4	0.18634	0.175012	0.19873	0.251551	0.164084	0.139574	0.248044	0.173705	0.202694	0.263377	0.181481	0.2555	1683.81	1671.01	1990.46	943.275	1961.66	1648.62	1796.53	1979.34	1120.94	2563.42	2575.19	2938.48	0	0	0	0	0	0	0	0	0
2000001	0732R	Guisantes verdes	R	0	7500	9000	9000	9750	0	0	0	0	0	0	0	0	0.6796	0.661623	0.695398	0.746235	0.73276	0.612003	0.680769	0.598284	0.60325	0.655633	0.615728	0.5243	973.45	1119.97	1075.05	1128.21	0	0	0	0	0	0	0	0	0	0	0	0	0	0	0	0	0
2000001	1201R	Manzano	R	0	19758.2	19463.1	21048.6	18515.4	6611.69	18222.7	36353.9	33479.2	18484.9	29444.7	30669.2	34644	0.3622	0.279909	0.313305	0.388313	0.341306	0.261013	0.296591	0.302519	0.388573	0.418333	0.307462	0.3469	2542.68	2227.77	2042.5	6839	1527.14	4179.39	8481.89	7465.18	4828.72	8929.31	10737.3	8637.41	0	0	0	0	0	0	0	0	0
2000001	1202R	Peral	R	2	28304.4	26341.5	27708.2	27033.5	25018.4	30536.1	29444.5	31205.7	26812	27776.6	26962.6	26312.8	0.544509	0.432065	0.4247	0.635142	0.538588	0.477539	0.469161	0.394089	0.459763	0.572388	0.446815	0.5097	3867.07	3427.69	4051.68	11840.4	4150.4	6547.97	5318.35	7323.9	6832.61	6949.58	6305.31	5743	0	115.232	0	238.224	0	0	0	0	0
2000001	1218R	Almendro	R	46	0	2250	2925	2925	3000	3000	3000	3000	2325	2400	2400	2400	1.55314	1.60106	1.02979	0.91113	0.868761	0.617514	0.727415	0.6832	0.903617	1.49862	1.48392	1.8548	0	1335.13	1666.06	1613.95	307.874	642.994	1613.8	1601.2	1258.12	359.859	1296.78	1289.77	273.026	0	0	0	249.686	245.783	0	0	0
2000001	1302R	Vid	R	0	6184.7	6184.7	6397.84	5138.06	5138.06	5737.5	5375.93	6065.76	5518.66	5147.57	3996.27	4510.07	0.476906	0.557499	0.53334	0.563065	0.536381	0.568517	0.618308	0.596894	0.612917	0.619928	0.804649	0.7017	745.296	622.162	909.718	143.802	818.491	764.923	845.684	1234.08	1230.91	1445.25	921.619	967.173	0	0	0	0	0	56.1504	32.3418	0	6.49468
2000001	1302S	Vid (Secano)	S	0	2984.36	4076.37	3512.2	2549.37	2554.42	2775.44	2383.85	2926.83	2298.07	2230.45	1983.18	2148.7	0.476906	0.557499	0.53334	0.563065	0.536381	0.568517	0.618308	0.596894	0.612917	0.619928	0.804649	0.7017	1026.2	1757.4	1964.27	1041.1	713.962	912.694	943.406	1184.08	1121.78	1076.92	1021.17	1205.21	0	0	0	0	0	0	0	0	0
2000002	0101R	Trigo	R	434	4613.78	4613.78	4531.39	4860.95	4613.78	4531.39	4696.17	4654.98	4613.78	5272.89	5016.66	5272.89	0.162961	0.154143	0.147643	0.215924	0.219547	0.160616	0.174271	0.228528	0.249617	0.214031	0.21084	0.2024	482.448	523.374	780.052	810.608	533.687	592.204	663.108	711.933	933.504	1099.88	1082.64	1226.17	273.003	259.901	0	0	43.3779	51.0002	0	0	0
2000002	0101S	Trigo (Secano)	S	942	2124.43	1823.2	1664.66	2695.17	3012.25	1347.59	2298.82	2259.19	2338.46	2536.63	1664.66	2378.09	0.162961	0.154143	0.147643	0.215924	0.219547	0.160616	0.174271	0.228528	0.249617	0.214031	0.21084	0.2024	225.286	188.811	304.972	288.419	405.484	190.085	267.461	310.643	400.473	466.901	292.321	412.964	166.336	159.51	48.9778	0	40.8705	42.7841	0	0	0
2000002	0102R	Cebada	R	49	4692.23	4735.75	4608.59	4950.82	4949.97	4780.13	4779.28	4736.61	4437.9	4693.94	4437.9	4352.56	0.145456	0.146635	0.133229	0.18851	0.170202	0.124946	0.150448	0.193469	0.224847	0.181234	0.163886	0.174	478.883	437.642	385.562	762.018	482.267	560.671	674.435	708.247	878.589	971.994	907.933	1021.45	286.109	241.572	57.5417	0	58.1515	65.4687	0	0	0
2000002	0102S	Cebada (Secano)	S	49	2082.43	1999.13	1955.91	2740.94	3283.16	1483.63	2200.3	2436.05	2003.84	2750.37	1728.81	2128	0.145456	0.146635	0.133229	0.18851	0.170202	0.124946	0.150448	0.193469	0.224847	0.181234	0.163886	0.174	244.922	222.643	225.134	331.619	500.188	212.997	280.445	366.837	366.666	509.64	313.273	396.813	176.321	154.474	41.8553	0	40.8404	46.9423	0	0	0
2000002	0103R	Avena	R	535.9	2838.03	2956.29	2759.2	3232.21	3389.87	2956.29	2916.87	3035.12	2838.03	2838.03	2680.37	2798.62	0.143959	0.156241	0.135667	0.16243	0.171606	0.12715	0.139837	0.18026	0.218604	0.167795	0.160668	0.1821	354.24	353.783	316.956	359.676	368.483	321.035	316.443	360.854	309.719	308.498	292.079	303.316	0	0	0	0	0	0	0	0	0
2000002	0103S	Avena (Secano)	S	72.3	2241.93	2020.3	2045.87	2813.07	3154.05	895.068	2045.87	2045.87	1960.63	1960.63	1534.4	1619.65	0.143959	0.156241	0.135667	0.16243	0.171606	0.12715	0.139837	0.18026	0.218604	0.167795	0.160668	0.1821	410.806	220.281	224.246	459.545	378.991	101.85	277.163	332.601	414.745	422.358	327.228	335.182	0	149.517	19.8624	0	75.4525	50.389	0	0	0
2000002	0104R	Centeno	R	110.6	2140.47	0	0	2604.24	2541.81	1962.1	2229.66	2497.22	2140.47	2318.84	2229.66	2586.4	0.143037	0.144979	0.135667	0.182657	0.160774	0.12204	0.146644	0.182346	0.220718	0.170001	0.152223	0.1638	337.537	0	0	366.122	349.068	269.191	407.293	339.596	295.115	318.448	306.956	354.145	0	0	0	0	0	0	0	0	0
2000002	0104S	Centeno (Secano)	S	26.3	1538.42	1538.42	1346.12	1865.34	1826.88	1057.66	1442.27	1730.72	1490.35	1730.72	1538.42	2307.63	0.143037	0.144979	0.135667	0.182657	0.160774	0.12204	0.146644	0.182346	0.220718	0.170001	0.152223	0.1638	181.717	197.215	161.941	286.627	322.321	184.439	205.392	300.684	339.234	388.923	365.066	550.336	171.967	153.702	38.824	0	91.4396	62.7433	0	0	0
2000002	0105S	Triticale (Secano)	S	18.4	1608.94	1966.48	2055.86	2324.02	2860.33	1430.17	2502.79	2502.79	2502.79	1877.09	1877.09	1877.09	0.156166	0.159443	0.147961	0.188715	0.185346	0.154804	0.174972	0.204791	0.22092	0.198886	0.181481	0.1764	236.202	276.786	277.762	304.17	365.691	182.666	319.35	316.857	369.488	223.58	265.18	309.523	0	0	0	0	0	0	0	0	0
2000002	0108R	Maiz	R	2363	8716.96	8626.16	8716.96	7445.74	7808.94	8626.16	9261.77	9443.37	8626.16	9170.97	8989.36	10805.4	0.16895	0.149064	0.160998	0.209968	0.182538	0.144484	0.18298	0.215418	0.234614	0.199488	0.170622	0.1729	973.64	943.054	1077.4	1136.72	1122.59	1213.27	1329.19	1646.91	2012.72	2262.85	2104	2721.29	460.553	512.118	117.076	0	115.45	115.838	0	0	0
2000002	0203S	Lentejas (Secano)	S	0	502.21	167.403	585.912	837.017	837.017	544.061	669.613	669.613	585.912	920.718	549.083	418.508	0.5414	0.629713	0.644947	0.594483	0.609698	0.609097	0.718606	0.756694	0.800406	0.551626	0.464812	0.5955	231.338	104.355	244.568	485.182	473.943	307.759	352.379	396.548	396.083	763.137	495.882	357.739	144.673	0	0	0	0	0	24.8945	99.5551	86.0419
2000002	0204S	Garbanzos (Secano)	S	19.5	536.824	447.353	751.554	492.089	805.236	581.559	715.766	536.824	536.824	894.707	608.401	581.559	0.636873	0.574725	0.594708	0.649413	0.659244	0.672021	0.628918	0.64824	0.658732	0.667067	0.551682	0.5891	266.425	170.342	294.918	222.076	290.949	204.209	273.314	234.343	288.176	583.476	389.958	368.197	211.377	161.155	0	0	141.407	153.582	0	0	80.4031
2000002	0205R	Guisante seco	R	31.1	1546.06	1374.27	1631.95	1631.95	1631.95	1631.95	1546.06	1546.06	1460.17	1546.06	1288.38	1331.33	0.183	0.168498	0.164072	0.226191	0.218243	0.187869	0.2031	0.222072	0.268346	0.260067	0.255984	0.2289	247.015	231.047	267.39	253.908	248.027	284.695	389.25	232.679	222.797	234.973	196.294	201.741	354.829	263.037	125.174	0	0	167.83	55.1042	0	0
2000002	0205S	Guisantes secos (Secano)	S	9	681.158	510.869	596.013	561.955	936.592	596.013	766.303	766.303	383.151	851.448	468.296	510.869	0.183	0.168498	0.164072	0.226191	0.218243	0.187869	0.2031	0.222072	0.268346	0.260067	0.255984	0.2289	169.145	115.016	129.625	102.531	239.525	127.981	177.331	181.42	115.505	282.754	149.262	167.615	245.306	186.54	95.1786	0	118.359	112.431	50.6398	54.7533	0
2000002	0206R	Veza	R	58.8	1296.02	1296.02	1296.02	1312.22	1458.02	1377.02	1296.02	1296.02	1296.02	1215.02	810.014	850.514	0.200506	0.212333	0.194385	0.248677	0.290256	0.255703	0.240136	0.216113	0.265426	0.309312	0.347277	0.388	226.142	258.917	208.122	204.131	221.559	209.044	196.554	195.019	197.721	184.632	123.392	128.861	0	293.733	0	0	0	0	0	0	0
2000002	0206S	Veza (Secano)	S	72.5	554.452	158.415	554.452	514.849	792.075	554.452	554.452	633.66	356.434	633.66	475.245	475.245	0.200506	0.212333	0.194385	0.248677	0.290256	0.255703	0.240136	0.216113	0.265426	0.309312	0.347277	0.388	123.555	39.0915	107.389	67.5727	101.55	71.015	115.073	80.447	45.8784	81.24	61.0805	60.7503	205.665	183.017	0	0	0	0	0	0	0
2000002	0303R	Patata	R	2	38611.6	37493.6	42068.7	39583	38645	43061.8	38165.2	41995.9	40507.3	39039.3	47134.4	34319.6	0.255555	0.189698	0.283946	0.251141	0.226568	0.150295	0.259555	0.211247	0.248208	0.348929	0.174342	0.2281	2761.71	2898.82	3443.32	3897.99	3599.99	4088.76	3638.98	4277.43	4807.95	4777.71	5594.91	4250.66	0	0	0	0	0	0	0	0	0
2000002	0402R	Remolacha	R	240	67895.8	76985.4	79733.4	80821.8	82531.1	87353.8	89644.5	86851.4	86581	70707.3	76868.5	90638.1	0.0700215	0.0607298	0.0463174	0.0360386	0.0372097	0.0371731	0.0358352	0.0309868	0.034739	0.0341005	0.034587	0.0381	1730.3	1945.42	2053.8	2370.97	2308.49	2379.41	2564.67	2924.77	3463.12	2840.18	2910.22	3756.02	0	6.56986	223.5	0	485.09	1443.1	1288.7	1123.75	982.056
2000002	0409R	Girasol	R	167	2010.14	1835.35	1922.74	1922.74	1931.48	2263.59	2359.73	2534.53	2184.94	2447.13	1747.95	1835.35	0.264769	0.278805	0.234343	0.404844	0.388245	0.225644	0.365759	0.377503	0.503866	0.340705	0.308668	0.364	295.676	304.525	251.525	532.529	372.241	411.695	539.037	646.527	734.261	903.514	679.627	828.277	273.084	149.528	65.8937	0	50.0776	57.2425	0	0	0
2000002	0409S	Girasol (Secano)	S	30	540.219	347.284	617.393	617.393	694.567	478.48	617.393	771.741	463.045	733.154	655.98	617.393	0.264769	0.278805	0.234343	0.404844	0.388245	0.225644	0.365759	0.377503	0.503866	0.340705	0.308668	0.364	98.6291	60.3896	114.418	104.098	152.669	92.2509	137.689	198.553	150.975	248.002	228.736	235.737	194.114	161.928	71.4688	0	63.5273	43.9063	0.650639	0	0
2000002	0602R	Maíz forrajero	R	94.4	68366.1	66656.9	68366.1	53285.4	68366.1	72638.9	64093.2	64093.2	64093.2	51274.5	51274.5	55547.4	0.0413174	0.0364542	0.0393728	0.0513487	0.0446405	0.0353342	0.0447485	0.0526814	0.0573758	0.0487857	0.0478587	0.0318	2161.4	2020.46	1989.16	1501.88	1882.3	1997.98	1761.19	1747.44	1771.65	1612.19	1185.59	1627.19	0	0	0	0	0	0	0	0	0
2000002	0606R	Alfalfa	R	883	36172.2	32153.1	36172.2	32153.1	38583.7	36976.1	36976.1	36976.1	32153.1	51846.9	25722.5	25722.5	0.136358	0.138243	0.117224	0.128445	0.167895	0.145286	0.116414	0.139242	0.167351	0.166491	0.148804	0.1513	420.581	437.288	467.721	413.05	697.993	1155.05	822.523	626.49	655.873	1307.51	158.526	718.796	0	0	0	0	16.0774	19.829	0	0	0
2000002	0606S	Alfalfa (Secano)	S	111	11464.8	7643.18	15286.4	11464.8	19107.9	7261.02	13757.7	13757.7	7643.18	16432.8	13757.7	6878.86	0.136358	0.138243	0.117224	0.128445	0.167895	0.145286	0.116414	0.139242	0.167351	0.166491	0.148804	0.1513	168.217	107.52	206.416	149.97	177.607	70.9413	182.141	177.083	105.81	293.045	896.691	127.707	0	0	0	0	107.286	100.508	0	0	0
2000002	0610R	Veza para forraje	R	17.6	20164.9	20164.9	16131.9	20164.9	24197.9	20971.5	20164.9	20164.9	16131.9	24278.5	13873.4	14115.4	0.12058	0.130403	0.109911	0.112223	0.12557	0.133963	0.0985969	0.103289	0.132008	0.12557	0.152524	0.1272	275.462	264.102	202.809	245.581	287.87	249.242	239.42	237.55	192.673	288.83	165.453	206.852	0	0	0	0	0	0	0	0	0
2000002	0610S	Veza para forraje (Secano)	S	32.2	11810	6298.67	11022.7	9448.01	13384.7	6298.67	11810	11810	5905	20313.2	9448.01	9448.01	0.12058	0.130403	0.109911	0.112223	0.12557	0.133963	0.0985969	0.103289	0.132008	0.12557	0.152524	0.1272	233.928	119.617	200.934	166.842	230.884	108.544	213.415	229.981	139.067	500.787	235.013	162.497	0	0	0	0	0	0	0	0	0
2000002	0701R	Col	R	0	35892.3	35892.3	36789.6	36341	39032.9	40019.9	39032.9	37686.9	36341	35892.3	34097.7	34097.7	0.290566	0.355545	0.318393	0.306995	0.300586	0.293176	0.250947	0.245312	0.304898	0.295672	0.271769	0.4429	3130.27	2332.28	2572.82	2964.65	3541.24	3821.51	3104.38	3639.63	2895.95	3776	3660.14	2709.2	0	0	0	0	0	0	0	0	0
2000002	0711R	Sandia	R	0	40000	40000	40000	42000	44500	40000	41000	35000	40000	38000	36000	36000	0.202463	0.218627	0.228832	0.24765	0.371897	0.231054	0.401795	0.241638	0.205413	0.272604	0.176353	0.2735	5105.26	4806.29	4845.38	8870.33	9180.63	6034.86	7873.88	4978.69	7524.95	6826.71	6715.89	3871.81	0	0	0	0	0	0	0	0	0
2000002	0717R	Tomate	R	5.2	16045.2	23838.6	20171.1	18337.4	17237.2	19529.3	24755.5	27322.7	28045.2	27506.1	27506.1	27506.1	0.474603	0.57627	0.394705	0.408232	0.373602	0.325039	0.378172	0.275008	0.302481	0.300486	0.291476	0.3256	1612.82	2297.37	1865.97	1643.27	1796.92	2072.04	3594.86	3138.64	3680.1	3581.79	3481.48	2400.71	0	0	0	0	0	0	765.352	0	0
2000002	0723R	Ajo	R	0	8967.39	9375	9211.96	7438.86	10190.2	9945.65	23885.9	9375	9782.61	9375	8152.17	9782.61	0.988823	1.13443	1.48269	1.35448	1.26403	1.20787	1.69567	1.86626	1.35089	1.17737	0.943399	1.3569	2203.55	1704.26	2192.58	2437.52	2971.21	2530.47	7018.88	3196.46	2977.09	4871.98	4039.97	3122.03	246.377	0	0	0	0	0	0	0	0
2000002	0724R	Cebolla	R	0	20651.3	22296.1	22838.5	17180.4	20158.4	20295.8	20731.1	20845.6	20818.1	20272.9	20158.4	19764.4	0.18634	0.175012	0.19873	0.251551	0.164084	0.139574	0.248044	0.173705	0.202694	0.263377	0.181481	0.2555	1683.81	1671.01	1990.46	943.275	1961.66	1648.62	1796.53	1979.34	1120.94	2563.42	2575.19	2938.48	0	0	0	0	0	0	0	0	0
2000002	0732R	Guisantes verdes	R	0	7500	9000	9000	9750	0	0	0	0	0	0	0	0	0.6796	0.661623	0.695398	0.746235	0.73276	0.612003	0.680769	0.598284	0.60325	0.655633	0.615728	0.5243	973.45	1119.97	1075.05	1128.21	0	0	0	0	0	0	0	0	0	0	0	0	0	0	0	0	0
2000002	1201R	Manzano	R	0	19758.2	19463.1	21048.6	18515.4	6611.69	18222.7	36353.9	33479.2	18484.9	29444.7	30669.2	34644	0.3622	0.279909	0.313305	0.388313	0.341306	0.261013	0.296591	0.302519	0.388573	0.418333	0.307462	0.3469	2542.68	2227.77	2042.5	6839	1527.14	4179.39	8481.89	7465.18	4828.72	8929.31	10737.3	8637.41	0	0	0	0	0	0	0	0	0
2000002	1202R	Peral	R	2	28304.4	26341.5	27708.2	27033.5	25018.4	30536.1	29444.5	31205.7	26812	27776.6	26962.6	26312.8	0.544509	0.432065	0.4247	0.635142	0.538588	0.477539	0.469161	0.394089	0.459763	0.572388	0.446815	0.5097	3867.07	3427.69	4051.68	11840.4	4150.4	6547.97	5318.35	7323.9	6832.61	6949.58	6305.31	5743	0	115.232	0	238.224	0	0	0	0	0
2000002	1218R	Almendro	R	102	0	2250	2925	2925	3000	3000	3000	3000	2325	2400	2400	2400	1.55314	1.60106	1.02979	0.91113	0.868761	0.617514	0.727415	0.6832	0.903617	1.49862	1.48392	1.8548	0	1335.13	1666.06	1613.95	307.874	642.994	1613.8	1601.2	1258.12	359.859	1296.78	1289.77	273.026	0	0	0	249.686	245.783	0	0	0
2000002	1302R	Vid	R	0	6184.7	6184.7	6397.84	5138.06	5138.06	5737.5	5375.93	6065.76	5518.66	5147.57	3996.27	4510.07	0.476906	0.557499	0.53334	0.563065	0.536381	0.568517	0.618308	0.596894	0.612917	0.619928	0.804649	0.7017	745.296	622.162	909.718	143.802	818.491	764.923	845.684	1234.08	1230.91	1445.25	921.619	967.173	0	0	0	0	0	56.1504	32.3418	0	6.49468
2000002	1302S	Vid (Secano)	S	2	2984.36	4076.37	3512.2	2549.37	2554.42	2775.44	2383.85	2926.83	2298.07	2230.45	1983.18	2148.7	0.476906	0.557499	0.53334	0.563065	0.536381	0.568517	0.618308	0.596894	0.612917	0.619928	0.804649	0.7017	1026.2	1757.4	1964.27	1041.1	713.962	912.694	943.406	1184.08	1121.78	1076.92	1021.17	1205.21	0	0	0	0	0	0	0	0	0
2000003	0101R	Trigo	R	1253	6151.71	6151.71	6041.86	6481.27	6151.71	6041.86	6261.56	6206.64	6151.71	7030.53	6688.89	7030.53	0.162961	0.154143	0.147643	0.215924	0.219547	0.160616	0.174271	0.228528	0.249617	0.214031	0.21084	0.2024	643.264	697.832	1386.76	1441.08	711.583	789.605	884.144	949.243	1244.67	1466.51	1443.53	1634.9	273.003	259.901	0	0	43.3779	51.0002	0	0	0
2000003	0101S	Trigo (Secano)	S	35	2832.57	2430.94	2219.55	3593.56	4016.33	1796.78	3065.1	3012.25	3117.94	3382.17	2219.55	3170.79	0.162961	0.154143	0.147643	0.215924	0.219547	0.160616	0.174271	0.228528	0.249617	0.214031	0.21084	0.2024	300.381	251.748	406.629	512.746	540.645	253.446	356.615	414.19	533.964	622.535	389.761	550.619	166.336	159.51	48.9778	0	40.8705	42.7841	0	0	0
2000003	0102R	Cebada	R	23	6256.31	6314.34	6144.79	6601.1	6599.96	6373.51	6372.37	6315.48	5917.2	6258.58	5917.2	5803.41	0.145456	0.146635	0.133229	0.18851	0.170202	0.124946	0.150448	0.193469	0.224847	0.181234	0.163886	0.174	638.511	583.523	514.083	1354.7	643.023	747.561	899.246	944.33	1171.45	1295.99	1210.58	1361.93	286.109	241.572	57.5417	0	58.1515	65.4687	0	0	0
2000003	0102S	Cebada (Secano)	S	5	2776.57	2665.51	2607.88	3654.59	4377.55	1978.17	2933.73	3248.06	2671.79	3667.17	2305.08	2837.34	0.145456	0.146635	0.133229	0.18851	0.170202	0.124946	0.150448	0.193469	0.224847	0.181234	0.163886	0.174	326.562	296.857	300.178	589.544	666.917	283.997	373.927	489.116	488.888	679.52	417.697	529.083	176.321	154.474	41.8553	0	40.8404	46.9423	0	0	0
2000003	0103R	Avena	R	74.6	3784.05	3941.71	3678.93	4309.61	4519.83	3941.71	3889.16	4046.83	3784.05	3784.05	3573.82	3731.49	0.143959	0.156241	0.135667	0.16243	0.171606	0.12715	0.139837	0.18026	0.218604	0.167795	0.160668	0.1821	629.76	628.948	563.477	639.424	655.082	570.73	562.566	481.139	550.611	548.44	519.251	539.229	0	0	0	0	0	0	0	0	0
2000003	0103S	Avena (Secano)	S	6.2	2989.24	2693.73	2727.83	3750.76	4205.4	1193.42	2727.83	2727.83	2614.17	2614.17	2045.87	2159.53	0.143959	0.156241	0.135667	0.16243	0.171606	0.12715	0.139837	0.18026	0.218604	0.167795	0.160668	0.1821	730.322	293.708	298.994	816.969	505.322	135.8	369.551	443.469	552.994	563.144	436.304	446.909	0	149.517	19.8624	0	75.4525	50.389	0	0	0
2000003	0104R	Centeno	R	11.6	2853.96	0	0	3472.32	3389.08	2616.13	2972.88	3329.62	2853.96	3091.79	2972.88	3448.54	0.143037	0.144979	0.135667	0.182657	0.160774	0.12204	0.146644	0.182346	0.220718	0.170001	0.152223	0.1638	600.066	0	0	650.884	620.565	478.561	543.057	603.727	524.65	566.129	545.7	629.59	0	0	0	0	0	0	0	0	0
2000003	0104S	Centeno (Secano)	S	0.5	2051.23	2051.23	1794.82	2487.11	2435.83	1410.22	1923.03	2307.63	1987.13	2307.63	2051.23	3076.84	0.143037	0.144979	0.135667	0.182657	0.160774	0.12204	0.146644	0.182346	0.220718	0.170001	0.152223	0.1638	242.29	262.953	215.921	509.56	429.761	245.919	273.856	400.912	452.312	518.564	486.754	733.781	171.967	153.702	38.824	0	91.4396	62.7433	0	0	0
2000003	0105S	Triticale (Secano)	S	1.3	2145.25	2621.97	2741.15	3098.69	3813.78	1906.89	3337.05	3337.05	3337.05	2502.79	2502.79	2502.79	0.156166	0.159443	0.147961	0.188715	0.185346	0.154804	0.174972	0.204791	0.22092	0.198886	0.181481	0.1764	419.914	492.064	493.8	540.747	650.118	324.739	567.734	563.301	492.651	298.107	353.574	412.697	0	0	0	0	0	0	0	0	0
2000003	0108R	Maiz	R	5273	11622.6	11501.5	11622.6	9927.65	10411.9	11501.5	12349	12591.2	11501.5	12228	11985.8	14407.2	0.16895	0.149064	0.160998	0.209968	0.182538	0.144484	0.18298	0.215418	0.234614	0.199488	0.170622	0.1729	1298.19	1257.4	1436.53	2020.84	1496.78	1617.69	1772.25	2195.88	2683.62	3017.14	2805.33	3628.39	460.553	512.118	117.076	0	115.45	115.838	0	0	0
2000003	0203S	Lentejas (Secano)	S	1.2	669.613	223.204	781.215	1116.02	1116.02	725.414	892.818	892.818	781.215	1227.62	732.11	558.011	0.5414	0.629713	0.644947	0.594483	0.609698	0.609097	0.718606	0.756694	0.800406	0.551626	0.464812	0.5955	308.451	185.52	326.091	862.545	842.565	547.128	469.838	528.731	528.11	1017.52	661.175	476.985	144.673	0	0	0	0	0	24.8945	99.5551	86.0419
2000003	0204S	Garbanzos (Secano)	S	11.9	715.766	596.471	1002.07	656.118	1073.65	775.413	954.354	715.766	715.766	1192.94	811.201	775.413	0.636873	0.574725	0.594708	0.649413	0.659244	0.672021	0.628918	0.64824	0.658732	0.667067	0.551682	0.5891	355.234	227.123	393.224	394.802	387.932	272.278	364.419	416.61	384.234	777.968	519.944	490.929	211.377	161.155	0	0	141.407	153.582	0	0	80.4031
2000003	0205R	Guisante seco	R	32.3	2061.41	1832.37	2175.93	2175.93	2175.93	2175.93	2061.41	2061.41	1946.89	2061.41	1717.84	1775.1	0.183	0.168498	0.164072	0.226191	0.218243	0.187869	0.2031	0.222072	0.268346	0.260067	0.255984	0.2289	329.353	308.063	356.519	451.392	440.936	379.593	519	413.652	396.083	417.729	348.967	358.65	354.829	263.037	125.174	0	0	167.83	55.1042	0	0
2000003	0205S	Guisantes secos (Secano)	S	4	908.211	681.158	794.684	749.274	1248.79	794.684	1021.74	1021.74	510.869	1135.26	624.395	681.158	0.183	0.168498	0.164072	0.226191	0.218243	0.187869	0.2031	0.222072	0.268346	0.260067	0.255984	0.2289	225.526	153.354	172.833	182.277	319.367	170.641	236.442	241.894	154.007	377.006	199.016	223.487	245.306	186.54	95.1786	0	118.359	112.431	50.6398	54.7533	0
2000003	0206R	Veza	R	54.8	1728.03	1728.03	1728.03	1749.63	1944.03	1836.03	1728.03	1728.03	1728.03	1620.03	1080.02	1134.02	0.200506	0.212333	0.194385	0.248677	0.290256	0.255703	0.240136	0.216113	0.265426	0.309312	0.347277	0.388	402.031	345.223	369.994	362.9	393.882	371.633	349.429	346.7	351.503	328.235	219.364	229.087	0	293.733	0	0	0	0	0	0	0
2000003	0206S	Veza (Secano)	S	74.9	739.27	211.22	739.27	686.465	1056.1	739.27	739.27	844.88	475.245	844.88	633.66	633.66	0.200506	0.212333	0.194385	0.248677	0.290256	0.255703	0.240136	0.216113	0.265426	0.309312	0.347277	0.388	164.741	52.1219	143.186	120.129	180.533	126.249	153.43	143.017	81.5615	144.427	108.588	108.001	205.665	183.017	0	0	0	0	0	0	0
2000003	0303R	Patata	R	13	51482.1	49991.5	56091.6	52777.4	51526.7	57415.7	50886.9	55994.6	54009.7	52052.4	62845.9	45759.5	0.255555	0.189698	0.283946	0.251141	0.226568	0.150295	0.259555	0.211247	0.248208	0.348929	0.174342	0.2281	3682.28	3865.09	4591.1	6929.76	4799.99	5451.68	4851.98	5703.24	6410.6	6370.28	7459.88	5667.55	0	0	0	0	0	0	0	0	0
2000003	0402R	Remolacha	R	190	90527.7	102647	106311	107762	110042	116472	119526	115802	115441	94276.4	102491	120851	0.0700215	0.0607298	0.0463174	0.0360386	0.0372097	0.0371731	0.0358352	0.0309868	0.034739	0.0341005	0.034587	0.0381	2307.07	2593.89	2738.39	4215.06	3077.99	3172.55	3419.56	3899.7	4617.49	3786.9	3880.3	5008.02	0	6.56986	223.5	0	485.09	1443.1	1288.7	1123.75	982.056
2000003	0409R	Girasol	R	291	2680.19	2447.13	2563.66	2563.66	2575.31	3018.13	3146.31	3379.37	2913.25	3262.84	2330.6	2447.13	0.264769	0.278805	0.234343	0.404844	0.388245	0.225644	0.365759	0.377503	0.503866	0.340705	0.308668	0.364	394.234	406.033	335.366	946.719	496.321	548.927	718.716	862.036	979.014	1204.69	906.169	1104.37	273.084	149.528	65.8937	0	50.0776	57.2425	0	0	0
2000003	0409S	Girasol (Secano)	S	24	720.292	463.045	823.191	823.191	926.089	637.973	823.191	1028.99	617.393	977.539	874.64	823.191	0.264769	0.278805	0.234343	0.404844	0.388245	0.225644	0.365759	0.377503	0.503866	0.340705	0.308668	0.364	131.505	80.5195	152.557	185.062	203.559	123.001	183.585	264.737	201.3	330.67	304.982	314.315	194.114	161.928	71.4688	0	63.5273	43.9063	0.650639	0	0
2000003	0421R	Colza	R	6.9	0	2176.66	4353.31	4190.06	4353.31	3047.32	3482.65	2938.49	3264.98	3482.65	3591.48	3373.82	0	0	0	0	0	0	0	0	0	0.336994	0.327772	0	0	1117.62	2145.6	2000.54	2030.34	1419.84	1621.07	1357.1	1528.78	1392.49	1422.43	1337.5	0	0	0	0	0	0	0	0	0
2000003	0602R	Maíz forrajero	R	11	91154.8	88875.9	91154.8	71047.2	91154.8	96851.9	85457.6	85457.6	85457.6	68366.1	68366.1	74063.2	0.0413174	0.0364542	0.0393728	0.0513487	0.0446405	0.0353342	0.0447485	0.0526814	0.0573758	0.0487857	0.0478587	0.0318	3842.49	3591.94	3536.29	2670.01	3346.32	3551.96	3131	3106.55	3149.59	2149.59	1580.78	2169.59	0	0	0	0	0	0	0	0	0
2000003	0606R	Alfalfa	R	780	48229.7	42870.8	48229.7	42870.8	51445	49301.4	49301.4	49301.4	42870.8	69129.2	34296.6	34296.6	0.136358	0.138243	0.117224	0.128445	0.167895	0.145286	0.116414	0.139242	0.167351	0.166491	0.148804	0.1513	560.775	583.05	623.628	734.312	930.657	1540.06	1096.7	835.32	874.497	1743.35	211.367	958.395	0	0	0	0	16.0774	19.829	0	0	0
2000003	0606S	Alfalfa (Secano)	S	19	15286.4	10190.9	20381.8	15286.4	25477.3	9681.36	18343.6	18343.6	10190.9	21910.4	18343.6	9171.81	0.136358	0.138243	0.117224	0.128445	0.167895	0.145286	0.116414	0.139242	0.167351	0.166491	0.148804	0.1513	299.053	191.147	366.963	266.613	236.809	94.5884	242.855	236.111	141.081	390.727	1195.59	170.276	0	0	0	0	107.286	100.508	0	0	0
2000003	0610R	Veza para forraje	R	0.5	26886.5	26886.5	21509.2	26886.5	32263.8	27962	26886.5	26886.5	21509.2	32371.4	18497.9	18820.6	0.12058	0.130403	0.109911	0.112223	0.12557	0.133963	0.0985969	0.103289	0.132008	0.12557	0.152524	0.1272	489.71	469.515	360.549	436.588	511.77	443.097	425.635	422.312	342.53	513.475	294.139	275.803	0	0	0	0	0	0	0	0	0
2000003	0610S	Veza para forraje (Secano)	S	1.4	15746.7	8398.23	14696.9	12597.3	17846.2	8398.23	15746.7	15746.7	7873.34	27084.3	12597.3	12597.3	0.12058	0.130403	0.109911	0.112223	0.12557	0.133963	0.0985969	0.103289	0.132008	0.12557	0.152524	0.1272	415.872	212.652	357.217	296.608	410.461	192.968	284.553	306.641	185.423	667.716	313.351	288.883	0	0	0	0	0	0	0	0	0
2000003	0701R	Col	R	7.9	47856.4	47856.4	49052.8	48454.6	52043.9	53359.9	52043.9	50249.3	48454.6	47856.4	45463.6	45463.6	0.290566	0.355545	0.318393	0.306995	0.300586	0.293176	0.250947	0.245312	0.304898	0.295672	0.271769	0.4429	4173.7	3109.71	3430.42	5270.49	4721.65	5095.34	5518.89	4852.83	3861.27	5034.67	4880.18	4816.36	0	0	0	0	0	0	0	0	0
2000003	0705R	Lechuga	R	3	38242.6	34936	33890.4	30756.2	30357.1	33406.4	34551.7	34551.7	33769.7	30715.5	27894.1	27894.1	0.370262	0.564456	0.417599	0.432874	0.491449	0.377642	0.468861	0.29795	0.442041	0.418534	0.335916	0.2512	2477.16	1831.28	3222.96	2676.32	2822.65	3409.66	3536.08	3688.97	2881.84	2610.87	2376.9	2364.05	0	0	0	0	0	0	0	0	0
2000003	0711R	Sandia	R	0	53333.3	53333.3	53333.3	56000	59333.3	53333.3	54666.7	46666.7	53333.3	50666.7	48000	48000	0.202463	0.218627	0.228832	0.24765	0.371897	0.231054	0.401795	0.241638	0.205413	0.272604	0.176353	0.2735	6807.02	6408.38	6460.5	15769.5	16321.1	8046.48	10498.5	6638.26	10033.3	9102.28	8954.52	5162.42	0	0	0	0	0	0	0	0	0
2000003	0717R	Tomate	R	4.8	21393.6	31784.8	26894.9	24449.9	22982.9	26039.1	33007.3	36430.3	37393.6	36674.8	36674.8	36674.8	0.474603	0.57627	0.394705	0.408232	0.373602	0.325039	0.378172	0.275008	0.302481	0.300486	0.291476	0.3256	2867.23	4084.22	3317.28	2921.37	2395.89	2762.72	4793.14	4184.86	4906.8	4775.72	4641.98	4267.93	0	0	0	0	0	0	765.352	0	0
2000003	0718R	Pimiento	R	9.8	19800	28235.3	23529.4	16470.6	25823.5	23529.4	26211.8	26235.3	25027.1	19176.5	15082.4	18823.5	0.994582	0.749295	0.732494	0.875194	0.850106	0.701278	0.838824	0.656881	0.615937	0.693745	0.654739	0.9148	5578.08	4767.87	4054.83	4136.77	7539.56	6910.3	6418.23	6373.83	6164.53	4704.82	3709.5	4604.61	0	0	0	0	0	0	0	0	0
2000003	0722R	Coliflor	R	12.5	39308.9	39308.9	42453.6	40432	40432	40993.5	43200.4	40656.6	40432	38522.7	39308.9	39308.9	0.397787	0.492022	0.494971	0.451663	0.376109	0.403593	0.547638	0.323077	0.416566	0.514016	0.386187	0.3787	4014.16	3387.23	4212.89	6089.17	4179.79	5189.72	6342.89	4050.5	4241.8	4816.88	5049.81	5765.84	0	0	0	0	0	0	0	0	0
2000003	0723R	Ajo	R	2.1	11956.5	12500	12282.6	9918.48	13587	13260.9	31847.8	12500	13043.5	12500	10869.6	13043.5	0.988823	1.13443	1.48269	1.35448	1.26403	1.20787	1.69567	1.86626	1.35089	1.17737	0.943399	1.3569	2938.07	2272.34	2923.44	4333.38	3961.61	3373.96	9358.51	4261.95	3969.46	6495.97	5386.62	5550.27	246.377	0	0	0	0	0	0	0	0
2000003	0724R	Cebolla	R	2.2	27535.1	29728.1	30451.4	22907.2	26877.8	27061.1	27641.4	27794.1	27757.5	27030.5	26877.8	26352.5	0.18634	0.175012	0.19873	0.251551	0.164084	0.139574	0.248044	0.173705	0.202694	0.263377	0.181481	0.2555	2245.08	2228.02	2653.94	1676.93	2615.55	2198.16	2395.37	2639.12	1992.78	3417.9	3433.58	3917.98	0	0	0	0	0	0	0	0	0
2000003	0732R	Guisantes verdes	R	0	10000	12000	12000	13000	0	0	0	0	0	0	0	0	0.6796	0.661623	0.695398	0.746235	0.73276	0.612003	0.680769	0.598284	0.60325	0.655633	0.615728	0.5243	1730.58	1991.06	1911.21	2005.71	0	0	0	0	0	0	0	0	0	0	0	0	0	0	0	0	0
2000003	1201R	Manzano	R	0	26344.3	25950.8	28064.8	24687.2	8815.59	24296.9	48471.9	44639	24646.6	39259.5	40892.2	46192	0.3622	0.279909	0.313305	0.388313	0.341306	0.261013	0.296591	0.302519	0.388573	0.418333	0.307462	0.3469	3390.24	2970.36	2723.33	12158.2	2036.19	5572.52	11309.2	9953.58	6438.3	11905.8	14316.3	11516.5	0	0	0	0	0	0	0	0	0
2000003	1202R	Peral	R	9	37739.1	35122	36944.2	36044.7	33357.8	40714.8	39259.3	41607.7	35749.3	37035.5	35950.1	35083.8	0.544509	0.432065	0.4247	0.635142	0.538588	0.477539	0.469161	0.394089	0.459763	0.572388	0.446815	0.5097	5156.1	4570.26	5402.24	21049.6	5533.87	8730.63	7091.14	9765.2	9110.14	9266.11	8407.07	7657.34	0	115.232	0	238.224	0	0	0	0	0
2000003	1218R	Almendro	R	2	0	3000	3900	3900	4000	4000	4000	4000	3100	3200	3200	3200	1.55314	1.60106	1.02979	0.91113	0.868761	0.617514	0.727415	0.6832	0.903617	1.49862	1.48392	1.8548	0	2373.57	2961.89	2869.24	410.499	857.325	2868.98	2846.58	2236.66	479.812	2305.39	2292.93	273.026	0	0	0	249.686	245.783	0	0	0
2000003	1302R	Vid	R	0	8246.27	8246.27	8530.45	6850.75	6850.75	7650	7167.91	8087.69	7358.21	6863.43	5328.36	6013.43	0.476906	0.557499	0.53334	0.563065	0.536381	0.568517	0.618308	0.596894	0.612917	0.619928	0.804649	0.7017	993.728	829.55	1212.96	191.736	1091.32	1019.9	1127.58	1645.44	1641.21	1926.99	1228.83	1289.56	0	0	0	0	0	56.1504	32.3418	0	6.49468
2000003	1302S	Vid (Secano)	S	2	3979.14	5435.16	4682.93	3399.16	3405.89	3700.59	3178.47	3902.44	3064.09	2973.93	2644.24	2864.93	0.476906	0.557499	0.53334	0.563065	0.536381	0.568517	0.618308	0.596894	0.612917	0.619928	0.804649	0.7017	1368.26	2343.2	2619.03	1850.84	951.95	1216.93	1257.88	1578.77	1495.71	1435.89	1361.55	1606.94	0	0	0	0	0	0	0	0	0
2000004	0101R	Trigo	R	15	3691.03	3691.03	3625.11	3888.76	3691.03	3625.11	3756.94	3723.98	3691.03	4218.32	4013.33	4218.32	0.162961	0.154143	0.147643	0.215924	0.219547	0.160616	0.174271	0.228528	0.249617	0.214031	0.21084	0.2024	385.959	418.699	499.234	518.789	426.95	473.763	530.486	569.546	746.803	879.908	866.116	980.939	273.003	259.901	0	0	43.3779	51.0002	0	0	0
2000004	0101S	Trigo (Secano)	S	4	1699.54	1458.56	1331.73	2156.14	2409.8	1078.07	1839.06	1807.35	1870.77	2029.3	1331.73	1902.47	0.162961	0.154143	0.147643	0.215924	0.219547	0.160616	0.174271	0.228528	0.249617	0.214031	0.21084	0.2024	180.229	151.049	243.977	184.588	324.387	152.068	213.969	248.514	320.379	373.521	233.857	330.371	166.336	159.51	48.9778	0	40.8705	42.7841	0	0	0
2000004	0102R	Cebada	R	0.5	3753.78	3788.6	3686.87	3960.66	3959.97	3824.11	3823.42	3789.29	3550.32	3755.15	3550.32	3482.05	0.145456	0.146635	0.133229	0.18851	0.170202	0.124946	0.150448	0.193469	0.224847	0.181234	0.163886	0.174	383.107	350.114	308.45	487.692	385.814	448.537	539.548	566.598	702.871	777.595	726.346	817.158	286.109	241.572	57.5417	0	58.1515	65.4687	0	0	0
2000004	0102S	Cebada (Secano)	S	0	1665.94	1599.3	1564.73	2192.76	2626.53	1186.9	1760.24	1948.84	1603.08	2200.3	1383.05	1702.4	0.145456	0.146635	0.133229	0.18851	0.170202	0.124946	0.150448	0.193469	0.224847	0.181234	0.163886	0.174	195.937	178.114	180.107	212.236	400.15	170.398	224.356	293.47	293.333	407.712	250.618	317.45	176.321	154.474	41.8553	0	40.8404	46.9423	0	0	0
2000004	0103R	Avena	R	13.7	2270.43	2365.03	2207.36	2585.76	2711.9	2365.03	2333.5	2428.1	2270.43	2270.43	2144.29	2238.89	0.143959	0.156241	0.135667	0.16243	0.171606	0.12715	0.139837	0.18026	0.218604	0.167795	0.160668	0.1821	226.714	226.421	202.852	230.193	235.829	205.463	202.524	288.683	198.22	197.439	186.93	194.122	0	0	0	0	0	0	0	0	0
2000004	0103S	Avena (Secano)	S	12.9	1793.55	1616.24	1636.7	2250.46	2523.24	716.055	1636.7	1636.7	1568.5	1568.5	1227.52	1295.72	0.143959	0.156241	0.135667	0.16243	0.171606	0.12715	0.139837	0.18026	0.218604	0.167795	0.160668	0.1821	262.916	176.225	179.397	294.109	303.193	81.4801	221.731	266.081	331.796	337.887	261.783	268.146	0	149.517	19.8624	0	75.4525	50.389	0	0	0
2000004	0104R	Centeno	R	1.3	1712.38	0	0	2083.39	2033.45	1569.68	1783.73	1997.77	1712.38	1855.08	1783.73	2069.12	0.143037	0.144979	0.135667	0.182657	0.160774	0.12204	0.146644	0.182346	0.220718	0.170001	0.152223	0.1638	216.024	0	0	234.318	223.403	172.282	325.834	217.342	188.874	203.807	196.452	226.653	0	0	0	0	0	0	0	0	0
2000004	0104S	Centeno (Secano)	S	14.1	1230.74	1230.74	1076.89	1492.27	1461.5	846.132	1153.82	1384.58	1192.28	1384.58	1230.74	1846.11	0.143037	0.144979	0.135667	0.182657	0.160774	0.12204	0.146644	0.182346	0.220718	0.170001	0.152223	0.1638	145.374	157.772	129.553	183.442	257.857	147.551	164.314	240.547	271.387	311.138	292.053	440.269	171.967	153.702	38.824	0	91.4396	62.7433	0	0	0
2000004	0105S	Triticale (Secano)	S	0	1287.15	1573.18	1644.69	1859.22	2288.27	1144.13	2002.23	2002.23	2002.23	1501.67	1501.67	1501.67	0.156166	0.159443	0.147961	0.188715	0.185346	0.154804	0.174972	0.204791	0.22092	0.198886	0.181481	0.1764	151.169	177.143	177.768	194.669	234.042	116.906	204.384	202.788	295.59	178.864	212.144	247.618	0	0	0	0	0	0	0	0	0
2000004	0108R	Maiz	R	1	6973.57	6900.93	6973.57	5956.59	6247.15	6900.93	7409.42	7554.7	6900.93	7336.77	7191.49	8644.32	0.16895	0.149064	0.160998	0.209968	0.182538	0.144484	0.18298	0.215418	0.234614	0.199488	0.170622	0.1729	778.912	754.443	861.918	727.503	898.069	970.613	1063.35	1317.53	1610.17	1810.28	1683.2	2177.03	460.553	512.118	117.076	0	115.45	115.838	0	0	0
2000004	0203S	Lentejas (Secano)	S	0	401.768	133.923	468.729	669.613	669.613	435.249	535.691	535.691	468.729	736.575	439.266	334.807	0.5414	0.629713	0.644947	0.594483	0.609698	0.609097	0.718606	0.756694	0.800406	0.551626	0.464812	0.5955	185.07	66.7871	195.654	310.516	303.323	196.966	281.903	317.238	316.866	610.51	396.705	286.191	144.673	0	0	0	0	0	24.8945	99.5551	86.0419
2000004	0204S	Garbanzos (Secano)	S	0	429.459	357.883	601.243	393.671	644.189	465.248	572.612	429.459	429.459	715.766	486.721	465.248	0.636873	0.574725	0.594708	0.649413	0.659244	0.672021	0.628918	0.64824	0.658732	0.667067	0.551682	0.5891	213.14	136.274	235.934	142.129	232.759	163.367	218.651	149.979	230.541	466.781	311.966	294.557	211.377	161.155	0	0	141.407	153.582	0	0	80.4031
2000004	0205S	Guisantes secos (Secano)	S	0	544.926	408.695	476.811	449.564	749.274	476.811	613.042	613.042	306.521	681.158	374.637	408.695	0.183	0.168498	0.164072	0.226191	0.218243	0.187869	0.2031	0.222072	0.268346	0.260067	0.255984	0.2289	135.316	92.0126	103.7	65.6198	191.62	102.385	141.865	145.136	92.4042	226.203	119.409	134.092	245.306	186.54	95.1786	0	118.359	112.431	50.6398	54.7533	0
2000004	0206R	Veza	R	0.3	1036.82	1036.82	1036.82	1049.78	1166.42	1101.62	1036.82	1036.82	1036.82	972.016	648.011	680.411	0.200506	0.212333	0.194385	0.248677	0.290256	0.255703	0.240136	0.216113	0.265426	0.309312	0.347277	0.388	144.731	207.134	133.198	130.644	141.798	133.788	125.794	124.812	126.541	118.165	78.971	82.4714	0	293.733	0	0	0	0	0	0	0
2000004	0206S	Veza (Secano)	S	1.7	443.562	126.732	443.562	411.879	633.66	443.562	443.562	506.928	285.147	506.928	380.196	380.196	0.200506	0.212333	0.194385	0.248677	0.290256	0.255703	0.240136	0.216113	0.265426	0.309312	0.347277	0.388	98.8444	31.2732	85.9114	43.2465	64.992	45.4496	92.0581	51.4861	29.3622	51.9936	39.0915	38.8802	205.665	183.017	0	0	0	0	0	0	0
2000004	0303R	Patata	R	0	30889.3	29994.9	33655	31666.4	30916	34449.4	30532.1	33596.8	32405.8	31231.4	37707.6	27455.7	0.255555	0.189698	0.283946	0.251141	0.226568	0.150295	0.259555	0.211247	0.248208	0.348929	0.174342	0.2281	2209.37	2319.05	2754.66	2494.71	2879.99	3271.01	2911.19	3421.94	3846.36	3822.17	4475.93	3400.53	0	0	0	0	0	0	0	0	0
2000004	0402R	Remolacha	R	0	54316.6	61588.3	63786.7	64657.4	66024.9	69883	71715.6	69481.1	69264.8	56565.9	61494.8	72510.5	0.0700215	0.0607298	0.0463174	0.0360386	0.0372097	0.0371731	0.0358352	0.0309868	0.034739	0.0341005	0.034587	0.0381	1384.24	1556.34	1643.04	1517.42	1846.79	1903.53	2051.73	2339.82	2770.49	2272.14	2328.18	3004.81	0	6.56986	223.5	0	485.09	1443.1	1288.7	1123.75	982.056
2000004	0409R	Girasol	R	0	1608.11	1468.28	1538.2	1538.2	1545.19	1810.88	1887.79	2027.62	1747.95	1957.7	1398.36	1468.28	0.264769	0.278805	0.234343	0.404844	0.388245	0.225644	0.365759	0.377503	0.503866	0.340705	0.308668	0.364	236.541	243.62	201.22	340.819	297.793	329.356	431.23	517.221	587.409	722.811	543.701	662.622	273.084	149.528	65.8937	0	50.0776	57.2425	0	0	0
2000004	0409S	Girasol (Secano)	S	0	432.175	277.827	493.914	493.914	555.654	382.784	493.914	617.393	370.436	586.523	524.784	493.914	0.264769	0.278805	0.234343	0.404844	0.388245	0.225644	0.365759	0.377503	0.503866	0.340705	0.308668	0.364	78.9033	48.3117	91.5341	66.6224	122.135	73.8007	110.151	158.842	120.78	198.402	182.989	188.589	194.114	161.928	71.4688	0	63.5273	43.9063	0.650639	0	0
2000004	0602R	Maíz forrajero	R	1.5	54692.9	53325.5	54692.9	42628.3	54692.9	58111.2	51274.5	51274.5	51274.5	41019.6	41019.6	44437.9	0.0413174	0.0364542	0.0393728	0.0513487	0.0446405	0.0353342	0.0447485	0.0526814	0.0573758	0.0487857	0.0478587	0.0318	1383.3	1293.1	1273.07	961.204	1204.67	1278.71	1127.16	1118.36	1133.85	1289.75	948.47	1301.75	0	0	0	0	0	0	0	0	0
2000004	0606R	Alfalfa	R	112	28937.8	25722.5	28937.8	25722.5	30867	29580.9	29580.9	29580.9	25722.5	41477.5	20578	20578	0.136358	0.138243	0.117224	0.128445	0.167895	0.145286	0.116414	0.139242	0.167351	0.166491	0.148804	0.1513	336.465	349.83	374.177	264.352	558.394	924.038	658.018	501.192	524.698	1046.01	126.82	575.037	0	0	0	0	16.0774	19.829	0	0	0
2000004	0606S	Alfalfa (Secano)	S	9	9171.81	6114.54	12229.1	9171.81	15286.4	5808.81	11006.2	11006.2	6114.54	13146.3	11006.2	5503.09	0.136358	0.138243	0.117224	0.128445	0.167895	0.145286	0.116414	0.139242	0.167351	0.166491	0.148804	0.1513	107.659	68.8129	132.107	95.9805	142.086	56.753	145.713	141.667	84.6483	234.436	717.352	102.165	0	0	0	0	107.286	100.508	0	0	0
2000004	0610R	Veza para forraje	R	0.9	16131.9	16131.9	12905.5	16131.9	19358.3	16777.2	16131.9	16131.9	12905.5	19422.8	11098.7	11292.3	0.12058	0.130403	0.109911	0.112223	0.12557	0.133963	0.0985969	0.103289	0.132008	0.12557	0.152524	0.1272	176.295	169.026	129.798	157.172	184.237	159.515	153.229	152.032	123.311	184.851	105.89	165.482	0	0	0	0	0	0	0	0	0
2000004	0610S	Veza para forraje (Secano)	S	1.7	9448.01	5038.94	8818.14	7558.41	10707.7	5038.94	9448.01	9448.01	4724	16250.6	7558.41	7558.41	0.12058	0.130403	0.109911	0.112223	0.12557	0.133963	0.0985969	0.103289	0.132008	0.12557	0.152524	0.1272	149.714	76.5547	128.598	106.779	147.766	69.4684	170.732	183.985	111.254	400.629	188.011	103.998	0	0	0	0	0	0	0	0	0
2000004	0701R	Col	R	0	28713.9	28713.9	29431.7	29072.8	31226.3	32016	31226.3	30149.6	29072.8	28713.9	27278.2	27278.2	0.290566	0.355545	0.318393	0.306995	0.300586	0.293176	0.250947	0.245312	0.304898	0.295672	0.271769	0.4429	2504.22	1865.83	2058.25	1897.38	2832.99	3057.2	1986.8	2911.7	2316.76	3020.8	2928.11	1733.89	0	0	0	0	0	0	0	0	0
2000004	0711R	Sandia	R	0	32000	32000	32000	33600	35600	32000	32800	28000	32000	30400	28800	28800	0.202463	0.218627	0.228832	0.24765	0.371897	0.231054	0.401795	0.241638	0.205413	0.272604	0.176353	0.2735	4084.21	3845.03	3876.3	5677.01	5875.6	4827.89	6299.1	3982.95	6019.96	5461.37	5372.71	3097.45	0	0	0	0	0	0	0	0	0
2000004	0723R	Ajo	R	0	7173.91	7500	7369.57	5951.09	8152.17	7956.52	19108.7	7500	7826.09	7500	6521.74	7826.09	0.988823	1.13443	1.48269	1.35448	1.26403	1.20787	1.69567	1.86626	1.35089	1.17737	0.943399	1.3569	1762.84	1363.41	1754.06	1560.02	2376.97	2024.38	5615.11	2557.17	2381.67	3897.58	3231.97	1998.1	246.377	0	0	0	0	0	0	0	0
2000004	0724R	Cebolla	R	0	16521.1	17836.9	18270.8	13744.3	16126.7	16236.7	16584.8	16676.5	16654.5	16218.3	16126.7	15811.5	0.18634	0.175012	0.19873	0.251551	0.164084	0.139574	0.248044	0.173705	0.202694	0.263377	0.181481	0.2555	1347.05	1336.81	1592.37	603.696	1569.33	1318.9	1437.22	1583.47	717.402	2050.74	2060.15	2350.79	0	0	0	0	0	0	0	0	0
2000004	0732R	Guisantes verdes	R	0	6000	7200	7200	7800	0	0	0	0	0	0	0	0	0.6796	0.661623	0.695398	0.746235	0.73276	0.612003	0.680769	0.598284	0.60325	0.655633	0.615728	0.5243	623.008	716.781	688.035	722.055	0	0	0	0	0	0	0	0	0	0	0	0	0	0	0	0	0
2000004	1201R	Manzano	R	0	15806.6	15570.5	16838.9	14812.3	5289.35	14578.2	29083.2	26783.4	14787.9	23555.7	24535.3	27715.2	0.3622	0.279909	0.313305	0.388313	0.341306	0.261013	0.296591	0.302519	0.388573	0.418333	0.307462	0.3469	2034.15	1782.21	1634	4376.96	1221.71	3343.51	6785.51	5972.15	3862.98	7143.45	8589.81	6909.93	0	0	0	0	0	0	0	0	0
2000004	1202R	Peral	R	0	22643.5	21073.2	22166.5	21626.8	20014.7	24428.9	23555.6	24964.6	21449.6	22221.3	21570.1	21050.3	0.544509	0.432065	0.4247	0.635142	0.538588	0.477539	0.469161	0.394089	0.459763	0.572388	0.446815	0.5097	3093.66	2742.15	3241.35	7577.86	3320.32	5238.38	4254.68	5859.12	5466.08	5559.67	5044.24	4594.4	0	115.232	0	238.224	0	0	0	0	0
2000004	1218R	Almendro	R	21	0	1800	2340	2340	2400	2400	2400	2400	1860	1920	1920	1920	1.55314	1.60106	1.02979	0.91113	0.868761	0.617514	0.727415	0.6832	0.903617	1.49862	1.48392	1.8548	0	854.484	1066.28	1032.93	246.3	514.395	1032.83	1024.77	805.199	287.887	829.941	825.455	273.026	0	0	0	249.686	245.783	0	0	0
2000004	1302R	Vid	R	0	4947.76	4947.76	5118.27	4110.45	4110.45	4590	4300.75	4852.61	4414.93	4118.06	3197.01	3608.06	0.476906	0.557499	0.53334	0.563065	0.536381	0.568517	0.618308	0.596894	0.612917	0.619928	0.804649	0.7017	596.237	497.73	727.774	115.041	654.793	611.938	676.547	987.265	984.728	1156.2	737.295	773.739	0	0	0	0	0	56.1504	32.3418	0	6.49468
2000004	1302S	Vid (Secano)	S	0	2387.49	3261.09	2809.76	2039.5	2043.53	2220.35	1907.08	2341.46	1838.45	1784.36	1586.54	1718.96	0.476906	0.557499	0.53334	0.563065	0.536381	0.568517	0.618308	0.596894	0.612917	0.619928	0.804649	0.7017	820.958	1405.92	1571.42	666.304	571.17	730.155	754.725	947.265	897.425	861.533	816.933	964.166	0	0	0	0	0	0	0	0	0
2000005	0101R	Trigo	R	6	4613.78	4613.78	4531.39	4860.95	4613.78	4531.39	4696.17	4654.98	4613.78	5272.89	5016.66	5272.89	0.162961	0.154143	0.147643	0.215924	0.219547	0.160616	0.174271	0.228528	0.249617	0.214031	0.21084	0.2024	482.448	523.374	780.052	810.608	533.687	592.204	663.108	711.933	933.504	1099.88	1082.64	1226.17	273.003	259.901	0	0	43.3779	51.0002	0	0	0
2000005	0101S	Trigo (Secano)	S	0	2124.43	1823.2	1664.66	2695.17	3012.25	1347.59	2298.82	2259.19	2338.46	2536.63	1664.66	2378.09	0.162961	0.154143	0.147643	0.215924	0.219547	0.160616	0.174271	0.228528	0.249617	0.214031	0.21084	0.2024	225.286	188.811	304.972	288.419	405.484	190.085	267.461	310.643	400.473	466.901	292.321	412.964	166.336	159.51	48.9778	0	40.8705	42.7841	0	0	0
2000005	0102R	Cebada	R	0	4692.23	4735.75	4608.59	4950.82	4949.97	4780.13	4779.28	4736.61	4437.9	4693.94	4437.9	4352.56	0.145456	0.146635	0.133229	0.18851	0.170202	0.124946	0.150448	0.193469	0.224847	0.181234	0.163886	0.174	478.883	437.642	385.562	762.018	482.267	560.671	674.435	708.247	878.589	971.994	907.933	1021.45	286.109	241.572	57.5417	0	58.1515	65.4687	0	0	0
2000005	0102S	Cebada (Secano)	S	0	2082.43	1999.13	1955.91	2740.94	3283.16	1483.63	2200.3	2436.05	2003.84	2750.37	1728.81	2128	0.145456	0.146635	0.133229	0.18851	0.170202	0.124946	0.150448	0.193469	0.224847	0.181234	0.163886	0.174	244.922	222.643	225.134	331.619	500.188	212.997	280.445	366.837	366.666	509.64	313.273	396.813	176.321	154.474	41.8553	0	40.8404	46.9423	0	0	0
2000005	0103R	Avena	R	2.1	2838.03	2956.29	2759.2	3232.21	3389.87	2956.29	2916.87	3035.12	2838.03	2838.03	2680.37	2798.62	0.143959	0.156241	0.135667	0.16243	0.171606	0.12715	0.139837	0.18026	0.218604	0.167795	0.160668	0.1821	354.24	353.783	316.956	359.676	368.483	321.035	316.443	360.854	309.719	308.498	292.079	303.316	0	0	0	0	0	0	0	0	0
2000005	0103S	Avena (Secano)	S	11.3	2241.93	2020.3	2045.87	2813.07	3154.05	895.068	2045.87	2045.87	1960.63	1960.63	1534.4	1619.65	0.143959	0.156241	0.135667	0.16243	0.171606	0.12715	0.139837	0.18026	0.218604	0.167795	0.160668	0.1821	410.806	220.281	224.246	459.545	378.991	101.85	277.163	332.601	414.745	422.358	327.228	335.182	0	149.517	19.8624	0	75.4525	50.389	0	0	0
2000005	0104R	Centeno	R	1.9	2140.47	0	0	2604.24	2541.81	1962.1	2229.66	2497.22	2140.47	2318.84	2229.66	2586.4	0.143037	0.144979	0.135667	0.182657	0.160774	0.12204	0.146644	0.182346	0.220718	0.170001	0.152223	0.1638	337.537	0	0	366.122	349.068	269.191	407.293	339.596	295.115	318.448	306.956	354.145	0	0	0	0	0	0	0	0	0
2000005	0104S	Centeno (Secano)	S	16.6	1538.42	1538.42	1346.12	1865.34	1826.88	1057.66	1442.27	1730.72	1490.35	1730.72	1538.42	2307.63	0.143037	0.144979	0.135667	0.182657	0.160774	0.12204	0.146644	0.182346	0.220718	0.170001	0.152223	0.1638	181.717	197.215	161.941	286.627	322.321	184.439	205.392	300.684	339.234	388.923	365.066	550.336	171.967	153.702	38.824	0	91.4396	62.7433	0	0	0
2000005	0105S	Triticale (Secano)	S	0	1608.94	1966.48	2055.86	2324.02	2860.33	1430.17	2502.79	2502.79	2502.79	1877.09	1877.09	1877.09	0.156166	0.159443	0.147961	0.188715	0.185346	0.154804	0.174972	0.204791	0.22092	0.198886	0.181481	0.1764	236.202	276.786	277.762	304.17	365.691	182.666	319.35	316.857	369.488	223.58	265.18	309.523	0	0	0	0	0	0	0	0	0
2000005	0108R	Maiz	R	12	8716.96	8626.16	8716.96	7445.74	7808.94	8626.16	9261.77	9443.37	8626.16	9170.97	8989.36	10805.4	0.16895	0.149064	0.160998	0.209968	0.182538	0.144484	0.18298	0.215418	0.234614	0.199488	0.170622	0.1729	973.64	943.054	1077.4	1136.72	1122.59	1213.27	1329.19	1646.91	2012.72	2262.85	2104	2721.29	460.553	512.118	117.076	0	115.45	115.838	0	0	0
2000005	0203S	Lentejas (Secano)	S	0	502.21	167.403	585.912	837.017	837.017	544.061	669.613	669.613	585.912	920.718	549.083	418.508	0.5414	0.629713	0.644947	0.594483	0.609698	0.609097	0.718606	0.756694	0.800406	0.551626	0.464812	0.5955	231.338	104.355	244.568	485.182	473.943	307.759	352.379	396.548	396.083	763.137	495.882	357.739	144.673	0	0	0	0	0	24.8945	99.5551	86.0419
2000005	0204S	Garbanzos (Secano)	S	0	536.824	447.353	751.554	492.089	805.236	581.559	715.766	536.824	536.824	894.707	608.401	581.559	0.636873	0.574725	0.594708	0.649413	0.659244	0.672021	0.628918	0.64824	0.658732	0.667067	0.551682	0.5891	266.425	170.342	294.918	222.076	290.949	204.209	273.314	234.343	288.176	583.476	389.958	368.197	211.377	161.155	0	0	141.407	153.582	0	0	80.4031
2000005	0205S	Guisantes secos (Secano)	S	0	681.158	510.869	596.013	561.955	936.592	596.013	766.303	766.303	383.151	851.448	468.296	510.869	0.183	0.168498	0.164072	0.226191	0.218243	0.187869	0.2031	0.222072	0.268346	0.260067	0.255984	0.2289	169.145	115.016	129.625	102.531	239.525	127.981	177.331	181.42	115.505	282.754	149.262	167.615	245.306	186.54	95.1786	0	118.359	112.431	50.6398	54.7533	0
2000005	0206R	Veza	R	0.2	1296.02	1296.02	1296.02	1312.22	1458.02	1377.02	1296.02	1296.02	1296.02	1215.02	810.014	850.514	0.200506	0.212333	0.194385	0.248677	0.290256	0.255703	0.240136	0.216113	0.265426	0.309312	0.347277	0.388	226.142	258.917	208.122	204.131	221.559	209.044	196.554	195.019	197.721	184.632	123.392	128.861	0	293.733	0	0	0	0	0	0	0
2000005	0206S	Veza (Secano)	S	0.8	554.452	158.415	554.452	514.849	792.075	554.452	554.452	633.66	356.434	633.66	475.245	475.245	0.200506	0.212333	0.194385	0.248677	0.290256	0.255703	0.240136	0.216113	0.265426	0.309312	0.347277	0.388	123.555	39.0915	107.389	67.5727	101.55	71.015	115.073	80.447	45.8784	81.24	61.0805	60.7503	205.665	183.017	0	0	0	0	0	0	0
2000005	0303R	Patata	R	0	38611.6	37493.6	42068.7	39583	38645	43061.8	38165.2	41995.9	40507.3	39039.3	47134.4	34319.6	0.255555	0.189698	0.283946	0.251141	0.226568	0.150295	0.259555	0.211247	0.248208	0.348929	0.174342	0.2281	2761.71	2898.82	3443.32	3897.99	3599.99	4088.76	3638.98	4277.43	4807.95	4777.71	5594.91	4250.66	0	0	0	0	0	0	0	0	0
2000005	0402R	Remolacha	R	2	67895.8	76985.4	79733.4	80821.8	82531.1	87353.8	89644.5	86851.4	86581	70707.3	76868.5	90638.1	0.0700215	0.0607298	0.0463174	0.0360386	0.0372097	0.0371731	0.0358352	0.0309868	0.034739	0.0341005	0.034587	0.0381	1730.3	1945.42	2053.8	2370.97	2308.49	2379.41	2564.67	2924.77	3463.12	2840.18	2910.22	3756.02	0	6.56986	223.5	0	485.09	1443.1	1288.7	1123.75	982.056
2000005	0409R	Girasol	R	2	2010.14	1835.35	1922.74	1922.74	1931.48	2263.59	2359.73	2534.53	2184.94	2447.13	1747.95	1835.35	0.264769	0.278805	0.234343	0.404844	0.388245	0.225644	0.365759	0.377503	0.503866	0.340705	0.308668	0.364	295.676	304.525	251.525	532.529	372.241	411.695	539.037	646.527	734.261	903.514	679.627	828.277	273.084	149.528	65.8937	0	50.0776	57.2425	0	0	0
2000005	0409S	Girasol (Secano)	S	0	540.219	347.284	617.393	617.393	694.567	478.48	617.393	771.741	463.045	733.154	655.98	617.393	0.264769	0.278805	0.234343	0.404844	0.388245	0.225644	0.365759	0.377503	0.503866	0.340705	0.308668	0.364	98.6291	60.3896	114.418	104.098	152.669	92.2509	137.689	198.553	150.975	248.002	228.736	235.737	194.114	161.928	71.4688	0	63.5273	43.9063	0.650639	0	0
2000005	0602R	Maíz forrajero	R	2	68366.1	66656.9	68366.1	53285.4	68366.1	72638.9	64093.2	64093.2	64093.2	51274.5	51274.5	55547.4	0.0413174	0.0364542	0.0393728	0.0513487	0.0446405	0.0353342	0.0447485	0.0526814	0.0573758	0.0487857	0.0478587	0.0318	2161.4	2020.46	1989.16	1501.88	1882.3	1997.98	1761.19	1747.44	1771.65	1612.19	1185.59	1627.19	0	0	0	0	0	0	0	0	0
2000005	0606R	Alfalfa	R	197	36172.2	32153.1	36172.2	32153.1	38583.7	36976.1	36976.1	36976.1	32153.1	51846.9	25722.5	25722.5	0.136358	0.138243	0.117224	0.128445	0.167895	0.145286	0.116414	0.139242	0.167351	0.166491	0.148804	0.1513	420.581	437.288	467.721	413.05	697.993	1155.05	822.523	626.49	655.873	1307.51	158.526	718.796	0	0	0	0	16.0774	19.829	0	0	0
2000005	0606S	Alfalfa (Secano)	S	8	11464.8	7643.18	15286.4	11464.8	19107.9	7261.02	13757.7	13757.7	7643.18	16432.8	13757.7	6878.86	0.136358	0.138243	0.117224	0.128445	0.167895	0.145286	0.116414	0.139242	0.167351	0.166491	0.148804	0.1513	168.217	107.52	206.416	149.97	177.607	70.9413	182.141	177.083	105.81	293.045	896.691	127.707	0	0	0	0	107.286	100.508	0	0	0
2000005	0701R	Col	R	0	35892.3	35892.3	36789.6	36341	39032.9	40019.9	39032.9	37686.9	36341	35892.3	34097.7	34097.7	0.290566	0.355545	0.318393	0.306995	0.300586	0.293176	0.250947	0.245312	0.304898	0.295672	0.271769	0.4429	3130.27	2332.28	2572.82	2964.65	3541.24	3821.51	3104.38	3639.63	2895.95	3776	3660.14	2709.2	0	0	0	0	0	0	0	0	0
2000005	0711R	Sandia	R	0	40000	40000	40000	42000	44500	40000	41000	35000	40000	38000	36000	36000	0.202463	0.218627	0.228832	0.24765	0.371897	0.231054	0.401795	0.241638	0.205413	0.272604	0.176353	0.2735	5105.26	4806.29	4845.38	8870.33	9180.63	6034.86	7873.88	4978.69	7524.95	6826.71	6715.89	3871.81	0	0	0	0	0	0	0	0	0
2000005	0723R	Ajo	R	0.7	8967.39	9375	9211.96	7438.86	10190.2	9945.65	23885.9	9375	9782.61	9375	8152.17	9782.61	0.988823	1.13443	1.48269	1.35448	1.26403	1.20787	1.69567	1.86626	1.35089	1.17737	0.943399	1.3569	2203.55	1704.26	2192.58	2437.52	2971.21	2530.47	7018.88	3196.46	2977.09	4871.98	4039.97	3122.03	246.377	0	0	0	0	0	0	0	0
2000005	0724R	Cebolla	R	0.7	20651.3	22296.1	22838.5	17180.4	20158.4	20295.8	20731.1	20845.6	20818.1	20272.9	20158.4	19764.4	0.18634	0.175012	0.19873	0.251551	0.164084	0.139574	0.248044	0.173705	0.202694	0.263377	0.181481	0.2555	1683.81	1671.01	1990.46	943.275	1961.66	1648.62	1796.53	1979.34	1120.94	2563.42	2575.19	2938.48	0	0	0	0	0	0	0	0	0
2000005	0732R	Guisantes verdes	R	0	7500	9000	9000	9750	0	0	0	0	0	0	0	0	0.6796	0.661623	0.695398	0.746235	0.73276	0.612003	0.680769	0.598284	0.60325	0.655633	0.615728	0.5243	973.45	1119.97	1075.05	1128.21	0	0	0	0	0	0	0	0	0	0	0	0	0	0	0	0	0
2000005	1201R	Manzano	R	0.5	19758.2	19463.1	21048.6	18515.4	6611.69	18222.7	36353.9	33479.2	18484.9	29444.7	30669.2	34644	0.3622	0.279909	0.313305	0.388313	0.341306	0.261013	0.296591	0.302519	0.388573	0.418333	0.307462	0.3469	2542.68	2227.77	2042.5	6839	1527.14	4179.39	8481.89	7465.18	4828.72	8929.31	10737.3	8637.41	0	0	0	0	0	0	0	0	0
2000005	1202R	Peral	R	0	28304.4	26341.5	27708.2	27033.5	25018.4	30536.1	29444.5	31205.7	26812	27776.6	26962.6	26312.8	0.544509	0.432065	0.4247	0.635142	0.538588	0.477539	0.469161	0.394089	0.459763	0.572388	0.446815	0.5097	3867.07	3427.69	4051.68	11840.4	4150.4	6547.97	5318.35	7323.9	6832.61	6949.58	6305.31	5743	0	115.232	0	238.224	0	0	0	0	0
2000005	1218R	Almendro	R	83	0	2250	2925	2925	3000	3000	3000	3000	2325	2400	2400	2400	1.55314	1.60106	1.02979	0.91113	0.868761	0.617514	0.727415	0.6832	0.903617	1.49862	1.48392	1.8548	0	1335.13	1666.06	1613.95	307.874	642.994	1613.8	1601.2	1258.12	359.859	1296.78	1289.77	273.026	0	0	0	249.686	245.783	0	0	0
2000005	1302R	Vid	R	0	6184.7	6184.7	6397.84	5138.06	5138.06	5737.5	5375.93	6065.76	5518.66	5147.57	3996.27	4510.07	0.476906	0.557499	0.53334	0.563065	0.536381	0.568517	0.618308	0.596894	0.612917	0.619928	0.804649	0.7017	745.296	622.162	909.718	143.802	818.491	764.923	845.684	1234.08	1230.91	1445.25	921.619	967.173	0	0	0	0	0	56.1504	32.3418	0	6.49468
2000005	1302S	Vid (Secano)	S	0	2984.36	4076.37	3512.2	2549.37	2554.42	2775.44	2383.85	2926.83	2298.07	2230.45	1983.18	2148.7	0.476906	0.557499	0.53334	0.563065	0.536381	0.568517	0.618308	0.596894	0.612917	0.619928	0.804649	0.7017	1026.2	1757.4	1964.27	1041.1	713.962	912.694	943.406	1184.08	1121.78	1076.92	1021.17	1205.21	0	0	0	0	0	0	0	0	0
2000006	0101R	Trigo	R	275	6151.71	6151.71	6041.86	6481.27	6151.71	6041.86	6261.56	6206.64	6151.71	7030.53	6688.89	7030.53	0.162961	0.154143	0.147643	0.215924	0.219547	0.160616	0.174271	0.228528	0.249617	0.214031	0.21084	0.2024	643.264	697.832	1386.76	1441.08	711.583	789.605	884.144	949.243	1244.67	1466.51	1443.53	1634.9	273.003	259.901	0	0	43.3779	51.0002	0	0	0
2000006	0101S	Trigo (Secano)	S	38	2832.57	2430.94	2219.55	3593.56	4016.33	1796.78	3065.1	3012.25	3117.94	3382.17	2219.55	3170.79	0.162961	0.154143	0.147643	0.215924	0.219547	0.160616	0.174271	0.228528	0.249617	0.214031	0.21084	0.2024	300.381	251.748	406.629	512.746	540.645	253.446	356.615	414.19	533.964	622.535	389.761	550.619	166.336	159.51	48.9778	0	40.8705	42.7841	0	0	0
2000006	0102R	Cebada	R	7	6256.31	6314.34	6144.79	6601.1	6599.96	6373.51	6372.37	6315.48	5917.2	6258.58	5917.2	5803.41	0.145456	0.146635	0.133229	0.18851	0.170202	0.124946	0.150448	0.193469	0.224847	0.181234	0.163886	0.174	638.511	583.523	514.083	1354.7	643.023	747.561	899.246	944.33	1171.45	1295.99	1210.58	1361.93	286.109	241.572	57.5417	0	58.1515	65.4687	0	0	0
2000006	0102S	Cebada (Secano)	S	2	2776.57	2665.51	2607.88	3654.59	4377.55	1978.17	2933.73	3248.06	2671.79	3667.17	2305.08	2837.34	0.145456	0.146635	0.133229	0.18851	0.170202	0.124946	0.150448	0.193469	0.224847	0.181234	0.163886	0.174	326.562	296.857	300.178	589.544	666.917	283.997	373.927	489.116	488.888	679.52	417.697	529.083	176.321	154.474	41.8553	0	40.8404	46.9423	0	0	0
2000006	0103R	Avena	R	26.8	3784.05	3941.71	3678.93	4309.61	4519.83	3941.71	3889.16	4046.83	3784.05	3784.05	3573.82	3731.49	0.143959	0.156241	0.135667	0.16243	0.171606	0.12715	0.139837	0.18026	0.218604	0.167795	0.160668	0.1821	629.76	628.948	563.477	639.424	655.082	570.73	562.566	481.139	550.611	548.44	519.251	539.229	0	0	0	0	0	0	0	0	0
2000006	0103S	Avena (Secano)	S	6.5	2989.24	2693.73	2727.83	3750.76	4205.4	1193.42	2727.83	2727.83	2614.17	2614.17	2045.87	2159.53	0.143959	0.156241	0.135667	0.16243	0.171606	0.12715	0.139837	0.18026	0.218604	0.167795	0.160668	0.1821	730.322	293.708	298.994	816.969	505.322	135.8	369.551	443.469	552.994	563.144	436.304	446.909	0	149.517	19.8624	0	75.4525	50.389	0	0	0
2000006	0104S	Centeno (Secano)	S	4.8	2051.23	2051.23	1794.82	2487.11	2435.83	1410.22	1923.03	2307.63	1987.13	2307.63	2051.23	3076.84	0.143037	0.144979	0.135667	0.182657	0.160774	0.12204	0.146644	0.182346	0.220718	0.170001	0.152223	0.1638	242.29	262.953	215.921	509.56	429.761	245.919	273.856	400.912	452.312	518.564	486.754	733.781	171.967	153.702	38.824	0	91.4396	62.7433	0	0	0
2000006	0105S	Triticale (Secano)	S	0.8	2145.25	2621.97	2741.15	3098.69	3813.78	1906.89	3337.05	3337.05	3337.05	2502.79	2502.79	2502.79	0.156166	0.159443	0.147961	0.188715	0.185346	0.154804	0.174972	0.204791	0.22092	0.198886	0.181481	0.1764	419.914	492.064	493.8	540.747	650.118	324.739	567.734	563.301	492.651	298.107	353.574	412.697	0	0	0	0	0	0	0	0	0
2000006	0108R	Maiz	R	1568	11622.6	11501.5	11622.6	9927.65	10411.9	11501.5	12349	12591.2	11501.5	12228	11985.8	14407.2	0.16895	0.149064	0.160998	0.209968	0.182538	0.144484	0.18298	0.215418	0.234614	0.199488	0.170622	0.1729	1298.19	1257.4	1436.53	2020.84	1496.78	1617.69	1772.25	2195.88	2683.62	3017.14	2805.33	3628.39	460.553	512.118	117.076	0	115.45	115.838	0	0	0
2000006	0203S	Lentejas (Secano)	S	0	669.613	223.204	781.215	1116.02	1116.02	725.414	892.818	892.818	781.215	1227.62	732.11	558.011	0.5414	0.629713	0.644947	0.594483	0.609698	0.609097	0.718606	0.756694	0.800406	0.551626	0.464812	0.5955	308.451	185.52	326.091	862.545	842.565	547.128	469.838	528.731	528.11	1017.52	661.175	476.985	144.673	0	0	0	0	0	24.8945	99.5551	86.0419
2000006	0204S	Garbanzos (Secano)	S	4.8	715.766	596.471	1002.07	656.118	1073.65	775.413	954.354	715.766	715.766	1192.94	811.201	775.413	0.636873	0.574725	0.594708	0.649413	0.659244	0.672021	0.628918	0.64824	0.658732	0.667067	0.551682	0.5891	355.234	227.123	393.224	394.802	387.932	272.278	364.419	416.61	384.234	777.968	519.944	490.929	211.377	161.155	0	0	141.407	153.582	0	0	80.4031
2000006	0205S	Guisantes secos (Secano)	S	1	908.211	681.158	794.684	749.274	1248.79	794.684	1021.74	1021.74	510.869	1135.26	624.395	681.158	0.183	0.168498	0.164072	0.226191	0.218243	0.187869	0.2031	0.222072	0.268346	0.260067	0.255984	0.2289	225.526	153.354	172.833	182.277	319.367	170.641	236.442	241.894	154.007	377.006	199.016	223.487	245.306	186.54	95.1786	0	118.359	112.431	50.6398	54.7533	0
2000006	0206R	Veza	R	1.2	1728.03	1728.03	1728.03	1749.63	1944.03	1836.03	1728.03	1728.03	1728.03	1620.03	1080.02	1134.02	0.200506	0.212333	0.194385	0.248677	0.290256	0.255703	0.240136	0.216113	0.265426	0.309312	0.347277	0.388	402.031	345.223	369.994	362.9	393.882	371.633	349.429	346.7	351.503	328.235	219.364	229.087	0	293.733	0	0	0	0	0	0	0
2000006	0206S	Veza (Secano)	S	12.3	739.27	211.22	739.27	686.465	1056.1	739.27	739.27	844.88	475.245	844.88	633.66	633.66	0.200506	0.212333	0.194385	0.248677	0.290256	0.255703	0.240136	0.216113	0.265426	0.309312	0.347277	0.388	164.741	52.1219	143.186	120.129	180.533	126.249	153.43	143.017	81.5615	144.427	108.588	108.001	205.665	183.017	0	0	0	0	0	0	0
2000006	0303R	Patata	R	0	51482.1	49991.5	56091.6	52777.4	51526.7	57415.7	50886.9	55994.6	54009.7	52052.4	62845.9	45759.5	0.255555	0.189698	0.283946	0.251141	0.226568	0.150295	0.259555	0.211247	0.248208	0.348929	0.174342	0.2281	3682.28	3865.09	4591.1	6929.76	4799.99	5451.68	4851.98	5703.24	6410.6	6370.28	7459.88	5667.55	0	0	0	0	0	0	0	0	0
2000006	0402R	Remolacha	R	68	90527.7	102647	106311	107762	110042	116472	119526	115802	115441	94276.4	102491	120851	0.0700215	0.0607298	0.0463174	0.0360386	0.0372097	0.0371731	0.0358352	0.0309868	0.034739	0.0341005	0.034587	0.0381	2307.07	2593.89	2738.39	4215.06	3077.99	3172.55	3419.56	3899.7	4617.49	3786.9	3880.3	5008.02	0	6.56986	223.5	0	485.09	1443.1	1288.7	1123.75	982.056
2000006	0409R	Girasol	R	54	2680.19	2447.13	2563.66	2563.66	2575.31	3018.13	3146.31	3379.37	2913.25	3262.84	2330.6	2447.13	0.264769	0.278805	0.234343	0.404844	0.388245	0.225644	0.365759	0.377503	0.503866	0.340705	0.308668	0.364	394.234	406.033	335.366	946.719	496.321	548.927	718.716	862.036	979.014	1204.69	906.169	1104.37	273.084	149.528	65.8937	0	50.0776	57.2425	0	0	0
2000006	0409S	Girasol (Secano)	S	6	720.292	463.045	823.191	823.191	926.089	637.973	823.191	1028.99	617.393	977.539	874.64	823.191	0.264769	0.278805	0.234343	0.404844	0.388245	0.225644	0.365759	0.377503	0.503866	0.340705	0.308668	0.364	131.505	80.5195	152.557	185.062	203.559	123.001	183.585	264.737	201.3	330.67	304.982	314.315	194.114	161.928	71.4688	0	63.5273	43.9063	0.650639	0	0
2000006	0421R	Colza	R	6.4	0	2176.66	4353.31	4190.06	4353.31	3047.32	3482.65	2938.49	3264.98	3482.65	3591.48	3373.82	0	0	0	0	0	0	0	0	0	0.336994	0.327772	0	0	1117.62	2145.6	2000.54	2030.34	1419.84	1621.07	1357.1	1528.78	1392.49	1422.43	1337.5	0	0	0	0	0	0	0	0	0
2000006	0421S	Colza (Secano)	S	6.6	1224.8	0	2449.59	2878.27	2939.51	918.597	3429.43	2204.63	1592.23	2572.07	2327.11	1837.19	0	0	0	0	0	0	0	0	0	0.336994	0.327772	0	729.869	0	1343.42	1529.13	1525.5	476.248	1776.24	1132.95	829.581	1071.94	876.471	704.316	0	0	0	0	0	0	0	0	0
2000006	0602R	Maíz forrajero	R	5.5	91154.8	88875.9	91154.8	71047.2	91154.8	96851.9	85457.6	85457.6	85457.6	68366.1	68366.1	74063.2	0.0413174	0.0364542	0.0393728	0.0513487	0.0446405	0.0353342	0.0447485	0.0526814	0.0573758	0.0487857	0.0478587	0.0318	3842.49	3591.94	3536.29	2670.01	3346.32	3551.96	3131	3106.55	3149.59	2149.59	1580.78	2169.59	0	0	0	0	0	0	0	0	0
2000006	0606R	Alfalfa	R	421	48229.7	42870.8	48229.7	42870.8	51445	49301.4	49301.4	49301.4	42870.8	69129.2	34296.6	34296.6	0.136358	0.138243	0.117224	0.128445	0.167895	0.145286	0.116414	0.139242	0.167351	0.166491	0.148804	0.1513	560.775	583.05	623.628	734.312	930.657	1540.06	1096.7	835.32	874.497	1743.35	211.367	958.395	0	0	0	0	16.0774	19.829	0	0	0
2000006	0606S	Alfalfa (Secano)	S	10	15286.4	10190.9	20381.8	15286.4	25477.3	9681.36	18343.6	18343.6	10190.9	21910.4	18343.6	9171.81	0.136358	0.138243	0.117224	0.128445	0.167895	0.145286	0.116414	0.139242	0.167351	0.166491	0.148804	0.1513	299.053	191.147	366.963	266.613	236.809	94.5884	242.855	236.111	141.081	390.727	1195.59	170.276	0	0	0	0	107.286	100.508	0	0	0
2000006	0610S	Veza para forraje (Secano)	S	2.4	15746.7	8398.23	14696.9	12597.3	17846.2	8398.23	15746.7	15746.7	7873.34	27084.3	12597.3	12597.3	0.12058	0.130403	0.109911	0.112223	0.12557	0.133963	0.0985969	0.103289	0.132008	0.12557	0.152524	0.1272	415.872	212.652	357.217	296.608	410.461	192.968	284.553	306.641	185.423	667.716	313.351	288.883	0	0	0	0	0	0	0	0	0
2000006	0701R	Col	R	5.2	47856.4	47856.4	49052.8	48454.6	52043.9	53359.9	52043.9	50249.3	48454.6	47856.4	45463.6	45463.6	0.290566	0.355545	0.318393	0.306995	0.300586	0.293176	0.250947	0.245312	0.304898	0.295672	0.271769	0.4429	4173.7	3109.71	3430.42	5270.49	4721.65	5095.34	5518.89	4852.83	3861.27	5034.67	4880.18	4816.36	0	0	0	0	0	0	0	0	0
2000006	0711R	Sandia	R	0	53333.3	53333.3	53333.3	56000	59333.3	53333.3	54666.7	46666.7	53333.3	50666.7	48000	48000	0.202463	0.218627	0.228832	0.24765	0.371897	0.231054	0.401795	0.241638	0.205413	0.272604	0.176353	0.2735	6807.02	6408.38	6460.5	15769.5	16321.1	8046.48	10498.5	6638.26	10033.3	9102.28	8954.52	5162.42	0	0	0	0	0	0	0	0	0
2000006	0723R	Ajo	R	2.1	11956.5	12500	12282.6	9918.48	13587	13260.9	31847.8	12500	13043.5	12500	10869.6	13043.5	0.988823	1.13443	1.48269	1.35448	1.26403	1.20787	1.69567	1.86626	1.35089	1.17737	0.943399	1.3569	2938.07	2272.34	2923.44	4333.38	3961.61	3373.96	9358.51	4261.95	3969.46	6495.97	5386.62	5550.27	246.377	0	0	0	0	0	0	0	0
2000006	0724R	Cebolla	R	0	27535.1	29728.1	30451.4	22907.2	26877.8	27061.1	27641.4	27794.1	27757.5	27030.5	26877.8	26352.5	0.18634	0.175012	0.19873	0.251551	0.164084	0.139574	0.248044	0.173705	0.202694	0.263377	0.181481	0.2555	2245.08	2228.02	2653.94	1676.93	2615.55	2198.16	2395.37	2639.12	1992.78	3417.9	3433.58	3917.98	0	0	0	0	0	0	0	0	0
2000006	0732R	Guisantes verdes	R	0	10000	12000	12000	13000	0	0	0	0	0	0	0	0	0.6796	0.661623	0.695398	0.746235	0.73276	0.612003	0.680769	0.598284	0.60325	0.655633	0.615728	0.5243	1730.58	1991.06	1911.21	2005.71	0	0	0	0	0	0	0	0	0	0	0	0	0	0	0	0	0
2000006	1201R	Manzano	R	5	26344.3	25950.8	28064.8	24687.2	8815.59	24296.9	48471.9	44639	24646.6	39259.5	40892.2	46192	0.3622	0.279909	0.313305	0.388313	0.341306	0.261013	0.296591	0.302519	0.388573	0.418333	0.307462	0.3469	3390.24	2970.36	2723.33	12158.2	2036.19	5572.52	11309.2	9953.58	6438.3	11905.8	14316.3	11516.5	0	0	0	0	0	0	0	0	0
2000006	1202R	Peral	R	0	37739.1	35122	36944.2	36044.7	33357.8	40714.8	39259.3	41607.7	35749.3	37035.5	35950.1	35083.8	0.544509	0.432065	0.4247	0.635142	0.538588	0.477539	0.469161	0.394089	0.459763	0.572388	0.446815	0.5097	5156.1	4570.26	5402.24	21049.6	5533.87	8730.63	7091.14	9765.2	9110.14	9266.11	8407.07	7657.34	0	115.232	0	238.224	0	0	0	0	0
2000006	1218R	Almendro	R	14	0	3000	3900	3900	4000	4000	4000	4000	3100	3200	3200	3200	1.55314	1.60106	1.02979	0.91113	0.868761	0.617514	0.727415	0.6832	0.903617	1.49862	1.48392	1.8548	0	2373.57	2961.89	2869.24	410.499	857.325	2868.98	2846.58	2236.66	479.812	2305.39	2292.93	273.026	0	0	0	249.686	245.783	0	0	0
2000006	1302R	Vid	R	0	8246.27	8246.27	8530.45	6850.75	6850.75	7650	7167.91	8087.69	7358.21	6863.43	5328.36	6013.43	0.476906	0.557499	0.53334	0.563065	0.536381	0.568517	0.618308	0.596894	0.612917	0.619928	0.804649	0.7017	993.728	829.55	1212.96	191.736	1091.32	1019.9	1127.58	1645.44	1641.21	1926.99	1228.83	1289.56	0	0	0	0	0	56.1504	32.3418	0	6.49468
2000006	1302S	Vid (Secano)	S	0	3979.14	5435.16	4682.93	3399.16	3405.89	3700.59	3178.47	3902.44	3064.09	2973.93	2644.24	2864.93	0.476906	0.557499	0.53334	0.563065	0.536381	0.568517	0.618308	0.596894	0.612917	0.619928	0.804649	0.7017	1368.26	2343.2	2619.03	1850.84	951.95	1216.93	1257.88	1578.77	1495.71	1435.89	1361.55	1606.94	0	0	0	0	0	0	0	0	0
2000007	0101R	Trigo	R	40	4613.78	4613.78	4531.39	4860.95	4613.78	4531.39	4696.17	4654.98	4613.78	5272.89	5016.66	5272.89	0.162961	0.154143	0.147643	0.215924	0.219547	0.160616	0.174271	0.228528	0.249617	0.214031	0.21084	0.2024	482.448	523.374	780.052	810.608	533.687	592.204	663.108	711.933	933.504	1099.88	1082.64	1226.17	273.003	259.901	0	0	43.3779	51.0002	0	0	0
2000007	0101S	Trigo (Secano)	S	46	2124.43	1823.2	1664.66	2695.17	3012.25	1347.59	2298.82	2259.19	2338.46	2536.63	1664.66	2378.09	0.162961	0.154143	0.147643	0.215924	0.219547	0.160616	0.174271	0.228528	0.249617	0.214031	0.21084	0.2024	225.286	188.811	304.972	288.419	405.484	190.085	267.461	310.643	400.473	466.901	292.321	412.964	166.336	159.51	48.9778	0	40.8705	42.7841	0	0	0
2000007	0102R	Cebada	R	3	4692.23	4735.75	4608.59	4950.82	4949.97	4780.13	4779.28	4736.61	4437.9	4693.94	4437.9	4352.56	0.145456	0.146635	0.133229	0.18851	0.170202	0.124946	0.150448	0.193469	0.224847	0.181234	0.163886	0.174	478.883	437.642	385.562	762.018	482.267	560.671	674.435	708.247	878.589	971.994	907.933	1021.45	286.109	241.572	57.5417	0	58.1515	65.4687	0	0	0
2000007	0102S	Cebada (Secano)	S	3	2082.43	1999.13	1955.91	2740.94	3283.16	1483.63	2200.3	2436.05	2003.84	2750.37	1728.81	2128	0.145456	0.146635	0.133229	0.18851	0.170202	0.124946	0.150448	0.193469	0.224847	0.181234	0.163886	0.174	244.922	222.643	225.134	331.619	500.188	212.997	280.445	366.837	366.666	509.64	313.273	396.813	176.321	154.474	41.8553	0	40.8404	46.9423	0	0	0
2000007	0103R	Avena	R	36.4	2838.03	2956.29	2759.2	3232.21	3389.87	2956.29	2916.87	3035.12	2838.03	2838.03	2680.37	2798.62	0.143959	0.156241	0.135667	0.16243	0.171606	0.12715	0.139837	0.18026	0.218604	0.167795	0.160668	0.1821	354.24	353.783	316.956	359.676	368.483	321.035	316.443	360.854	309.719	308.498	292.079	303.316	0	0	0	0	0	0	0	0	0
2000007	0103S	Avena (Secano)	S	6.4	2241.93	2020.3	2045.87	2813.07	3154.05	895.068	2045.87	2045.87	1960.63	1960.63	1534.4	1619.65	0.143959	0.156241	0.135667	0.16243	0.171606	0.12715	0.139837	0.18026	0.218604	0.167795	0.160668	0.1821	410.806	220.281	224.246	459.545	378.991	101.85	277.163	332.601	414.745	422.358	327.228	335.182	0	149.517	19.8624	0	75.4525	50.389	0	0	0
2000007	0104R	Centeno	R	0	2140.47	0	0	2604.24	2541.81	1962.1	2229.66	2497.22	2140.47	2318.84	2229.66	2586.4	0.143037	0.144979	0.135667	0.182657	0.160774	0.12204	0.146644	0.182346	0.220718	0.170001	0.152223	0.1638	337.537	0	0	366.122	349.068	269.191	407.293	339.596	295.115	318.448	306.956	354.145	0	0	0	0	0	0	0	0	0
2000007	0104S	Centeno (Secano)	S	5.6	1538.42	1538.42	1346.12	1865.34	1826.88	1057.66	1442.27	1730.72	1490.35	1730.72	1538.42	2307.63	0.143037	0.144979	0.135667	0.182657	0.160774	0.12204	0.146644	0.182346	0.220718	0.170001	0.152223	0.1638	181.717	197.215	161.941	286.627	322.321	184.439	205.392	300.684	339.234	388.923	365.066	550.336	171.967	153.702	38.824	0	91.4396	62.7433	0	0	0
2000007	0105S	Triticale (Secano)	S	0	1608.94	1966.48	2055.86	2324.02	2860.33	1430.17	2502.79	2502.79	2502.79	1877.09	1877.09	1877.09	0.156166	0.159443	0.147961	0.188715	0.185346	0.154804	0.174972	0.204791	0.22092	0.198886	0.181481	0.1764	236.202	276.786	277.762	304.17	365.691	182.666	319.35	316.857	369.488	223.58	265.18	309.523	0	0	0	0	0	0	0	0	0
2000007	0108R	Maiz	R	0	8716.96	8626.16	8716.96	7445.74	7808.94	8626.16	9261.77	9443.37	8626.16	9170.97	8989.36	10805.4	0.16895	0.149064	0.160998	0.209968	0.182538	0.144484	0.18298	0.215418	0.234614	0.199488	0.170622	0.1729	973.64	943.054	1077.4	1136.72	1122.59	1213.27	1329.19	1646.91	2012.72	2262.85	2104	2721.29	460.553	512.118	117.076	0	115.45	115.838	0	0	0
2000007	0203S	Lentejas (Secano)	S	0	502.21	167.403	585.912	837.017	837.017	544.061	669.613	669.613	585.912	920.718	549.083	418.508	0.5414	0.629713	0.644947	0.594483	0.609698	0.609097	0.718606	0.756694	0.800406	0.551626	0.464812	0.5955	231.338	104.355	244.568	485.182	473.943	307.759	352.379	396.548	396.083	763.137	495.882	357.739	144.673	0	0	0	0	0	24.8945	99.5551	86.0419
2000007	0204S	Garbanzos (Secano)	S	0	536.824	447.353	751.554	492.089	805.236	581.559	715.766	536.824	536.824	894.707	608.401	581.559	0.636873	0.574725	0.594708	0.649413	0.659244	0.672021	0.628918	0.64824	0.658732	0.667067	0.551682	0.5891	266.425	170.342	294.918	222.076	290.949	204.209	273.314	234.343	288.176	583.476	389.958	368.197	211.377	161.155	0	0	141.407	153.582	0	0	80.4031
2000007	0205S	Guisantes secos (Secano)	S	0	681.158	510.869	596.013	561.955	936.592	596.013	766.303	766.303	383.151	851.448	468.296	510.869	0.183	0.168498	0.164072	0.226191	0.218243	0.187869	0.2031	0.222072	0.268346	0.260067	0.255984	0.2289	169.145	115.016	129.625	102.531	239.525	127.981	177.331	181.42	115.505	282.754	149.262	167.615	245.306	186.54	95.1786	0	118.359	112.431	50.6398	54.7533	0
2000007	0303R	Patata	R	0	38611.6	37493.6	42068.7	39583	38645	43061.8	38165.2	41995.9	40507.3	39039.3	47134.4	34319.6	0.255555	0.189698	0.283946	0.251141	0.226568	0.150295	0.259555	0.211247	0.248208	0.348929	0.174342	0.2281	2761.71	2898.82	3443.32	3897.99	3599.99	4088.76	3638.98	4277.43	4807.95	4777.71	5594.91	4250.66	0	0	0	0	0	0	0	0	0
2000007	0402R	Remolacha	R	0	67895.8	76985.4	79733.4	80821.8	82531.1	87353.8	89644.5	86851.4	86581	70707.3	76868.5	90638.1	0.0700215	0.0607298	0.0463174	0.0360386	0.0372097	0.0371731	0.0358352	0.0309868	0.034739	0.0341005	0.034587	0.0381	1730.3	1945.42	2053.8	2370.97	2308.49	2379.41	2564.67	2924.77	3463.12	2840.18	2910.22	3756.02	0	6.56986	223.5	0	485.09	1443.1	1288.7	1123.75	982.056
2000007	0409R	Girasol	R	0	2010.14	1835.35	1922.74	1922.74	1931.48	2263.59	2359.73	2534.53	2184.94	2447.13	1747.95	1835.35	0.264769	0.278805	0.234343	0.404844	0.388245	0.225644	0.365759	0.377503	0.503866	0.340705	0.308668	0.364	295.676	304.525	251.525	532.529	372.241	411.695	539.037	646.527	734.261	903.514	679.627	828.277	273.084	149.528	65.8937	0	50.0776	57.2425	0	0	0
2000007	0409S	Girasol (Secano)	S	0	540.219	347.284	617.393	617.393	694.567	478.48	617.393	771.741	463.045	733.154	655.98	617.393	0.264769	0.278805	0.234343	0.404844	0.388245	0.225644	0.365759	0.377503	0.503866	0.340705	0.308668	0.364	98.6291	60.3896	114.418	104.098	152.669	92.2509	137.689	198.553	150.975	248.002	228.736	235.737	194.114	161.928	71.4688	0	63.5273	43.9063	0.650639	0	0
2000007	0606R	Alfalfa	R	78	36172.2	32153.1	36172.2	32153.1	38583.7	36976.1	36976.1	36976.1	32153.1	51846.9	25722.5	25722.5	0.136358	0.138243	0.117224	0.128445	0.167895	0.145286	0.116414	0.139242	0.167351	0.166491	0.148804	0.1513	420.581	437.288	467.721	413.05	697.993	1155.05	822.523	626.49	655.873	1307.51	158.526	718.796	0	0	0	0	16.0774	19.829	0	0	0
2000007	0606S	Alfalfa (Secano)	S	25	11464.8	7643.18	15286.4	11464.8	19107.9	7261.02	13757.7	13757.7	7643.18	16432.8	13757.7	6878.86	0.136358	0.138243	0.117224	0.128445	0.167895	0.145286	0.116414	0.139242	0.167351	0.166491	0.148804	0.1513	168.217	107.52	206.416	149.97	177.607	70.9413	182.141	177.083	105.81	293.045	896.691	127.707	0	0	0	0	107.286	100.508	0	0	0
2000007	0610R	Veza para forraje	R	2.6	20164.9	20164.9	16131.9	20164.9	24197.9	20971.5	20164.9	20164.9	16131.9	24278.5	13873.4	14115.4	0.12058	0.130403	0.109911	0.112223	0.12557	0.133963	0.0985969	0.103289	0.132008	0.12557	0.152524	0.1272	275.462	264.102	202.809	245.581	287.87	249.242	239.42	237.55	192.673	288.83	165.453	206.852	0	0	0	0	0	0	0	0	0
2000007	0610S	Veza para forraje (Secano)	S	3.4	11810	6298.67	11022.7	9448.01	13384.7	6298.67	11810	11810	5905	20313.2	9448.01	9448.01	0.12058	0.130403	0.109911	0.112223	0.12557	0.133963	0.0985969	0.103289	0.132008	0.12557	0.152524	0.1272	233.928	119.617	200.934	166.842	230.884	108.544	213.415	229.981	139.067	500.787	235.013	162.497	0	0	0	0	0	0	0	0	0
2000007	0701R	Col	R	0	35892.3	35892.3	36789.6	36341	39032.9	40019.9	39032.9	37686.9	36341	35892.3	34097.7	34097.7	0.290566	0.355545	0.318393	0.306995	0.300586	0.293176	0.250947	0.245312	0.304898	0.295672	0.271769	0.4429	3130.27	2332.28	2572.82	2964.65	3541.24	3821.51	3104.38	3639.63	2895.95	3776	3660.14	2709.2	0	0	0	0	0	0	0	0	0
2000007	0711R	Sandia	R	0	40000	40000	40000	42000	44500	40000	41000	35000	40000	38000	36000	36000	0.202463	0.218627	0.228832	0.24765	0.371897	0.231054	0.401795	0.241638	0.205413	0.272604	0.176353	0.2735	5105.26	4806.29	4845.38	8870.33	9180.63	6034.86	7873.88	4978.69	7524.95	6826.71	6715.89	3871.81	0	0	0	0	0	0	0	0	0
2000007	0723R	Ajo	R	0	8967.39	9375	9211.96	7438.86	10190.2	9945.65	23885.9	9375	9782.61	9375	8152.17	9782.61	0.988823	1.13443	1.48269	1.35448	1.26403	1.20787	1.69567	1.86626	1.35089	1.17737	0.943399	1.3569	2203.55	1704.26	2192.58	2437.52	2971.21	2530.47	7018.88	3196.46	2977.09	4871.98	4039.97	3122.03	246.377	0	0	0	0	0	0	0	0
2000007	0724R	Cebolla	R	0	20651.3	22296.1	22838.5	17180.4	20158.4	20295.8	20731.1	20845.6	20818.1	20272.9	20158.4	19764.4	0.18634	0.175012	0.19873	0.251551	0.164084	0.139574	0.248044	0.173705	0.202694	0.263377	0.181481	0.2555	1683.81	1671.01	1990.46	943.275	1961.66	1648.62	1796.53	1979.34	1120.94	2563.42	2575.19	2938.48	0	0	0	0	0	0	0	0	0
2000007	0732R	Guisantes verdes	R	0	7500	9000	9000	9750	0	0	0	0	0	0	0	0	0.6796	0.661623	0.695398	0.746235	0.73276	0.612003	0.680769	0.598284	0.60325	0.655633	0.615728	0.5243	973.45	1119.97	1075.05	1128.21	0	0	0	0	0	0	0	0	0	0	0	0	0	0	0	0	0
2000007	1201R	Manzano	R	6	19758.2	19463.1	21048.6	18515.4	6611.69	18222.7	36353.9	33479.2	18484.9	29444.7	30669.2	34644	0.3622	0.279909	0.313305	0.388313	0.341306	0.261013	0.296591	0.302519	0.388573	0.418333	0.307462	0.3469	2542.68	2227.77	2042.5	6839	1527.14	4179.39	8481.89	7465.18	4828.72	8929.31	10737.3	8637.41	0	0	0	0	0	0	0	0	0
2000007	1202R	Peral	R	0	28304.4	26341.5	27708.2	27033.5	25018.4	30536.1	29444.5	31205.7	26812	27776.6	26962.6	26312.8	0.544509	0.432065	0.4247	0.635142	0.538588	0.477539	0.469161	0.394089	0.459763	0.572388	0.446815	0.5097	3867.07	3427.69	4051.68	11840.4	4150.4	6547.97	5318.35	7323.9	6832.61	6949.58	6305.31	5743	0	115.232	0	238.224	0	0	0	0	0
2000007	1218R	Almendro	R	235	0	2250	2925	2925	3000	3000	3000	3000	2325	2400	2400	2400	1.55314	1.60106	1.02979	0.91113	0.868761	0.617514	0.727415	0.6832	0.903617	1.49862	1.48392	1.8548	0	1335.13	1666.06	1613.95	307.874	642.994	1613.8	1601.2	1258.12	359.859	1296.78	1289.77	273.026	0	0	0	249.686	245.783	0	0	0
2000007	1302R	Vid	R	0	6184.7	6184.7	6397.84	5138.06	5138.06	5737.5	5375.93	6065.76	5518.66	5147.57	3996.27	4510.07	0.476906	0.557499	0.53334	0.563065	0.536381	0.568517	0.618308	0.596894	0.612917	0.619928	0.804649	0.7017	745.296	622.162	909.718	143.802	818.491	764.923	845.684	1234.08	1230.91	1445.25	921.619	967.173	0	0	0	0	0	56.1504	32.3418	0	6.49468
2000007	1302S	Vid (Secano)	S	0	2984.36	4076.37	3512.2	2549.37	2554.42	2775.44	2383.85	2926.83	2298.07	2230.45	1983.18	2148.7	0.476906	0.557499	0.53334	0.563065	0.536381	0.568517	0.618308	0.596894	0.612917	0.619928	0.804649	0.7017	1026.2	1757.4	1964.27	1041.1	713.962	912.694	943.406	1184.08	1121.78	1076.92	1021.17	1205.21	0	0	0	0	0	0	0	0	0
2000008	0101R	Trigo	R	63	4613.78	4613.78	4531.39	4860.95	4613.78	4531.39	4696.17	4654.98	4613.78	5272.89	5016.66	5272.89	0.162961	0.154143	0.147643	0.215924	0.219547	0.160616	0.174271	0.228528	0.249617	0.214031	0.21084	0.2024	482.448	523.374	780.052	810.608	533.687	592.204	663.108	711.933	933.504	1099.88	1082.64	1226.17	273.003	259.901	0	0	43.3779	51.0002	0	0	0
2000008	0101S	Trigo (Secano)	S	79	2124.43	1823.2	1664.66	2695.17	3012.25	1347.59	2298.82	2259.19	2338.46	2536.63	1664.66	2378.09	0.162961	0.154143	0.147643	0.215924	0.219547	0.160616	0.174271	0.228528	0.249617	0.214031	0.21084	0.2024	225.286	188.811	304.972	288.419	405.484	190.085	267.461	310.643	400.473	466.901	292.321	412.964	166.336	159.51	48.9778	0	40.8705	42.7841	0	0	0
2000008	0102R	Cebada	R	5	4692.23	4735.75	4608.59	4950.82	4949.97	4780.13	4779.28	4736.61	4437.9	4693.94	4437.9	4352.56	0.145456	0.146635	0.133229	0.18851	0.170202	0.124946	0.150448	0.193469	0.224847	0.181234	0.163886	0.174	478.883	437.642	385.562	762.018	482.267	560.671	674.435	708.247	878.589	971.994	907.933	1021.45	286.109	241.572	57.5417	0	58.1515	65.4687	0	0	0
2000008	0102S	Cebada (Secano)	S	23	2082.43	1999.13	1955.91	2740.94	3283.16	1483.63	2200.3	2436.05	2003.84	2750.37	1728.81	2128	0.145456	0.146635	0.133229	0.18851	0.170202	0.124946	0.150448	0.193469	0.224847	0.181234	0.163886	0.174	244.922	222.643	225.134	331.619	500.188	212.997	280.445	366.837	366.666	509.64	313.273	396.813	176.321	154.474	41.8553	0	40.8404	46.9423	0	0	0
2000008	0103R	Avena	R	79.3	2838.03	2956.29	2759.2	3232.21	3389.87	2956.29	2916.87	3035.12	2838.03	2838.03	2680.37	2798.62	0.143959	0.156241	0.135667	0.16243	0.171606	0.12715	0.139837	0.18026	0.218604	0.167795	0.160668	0.1821	354.24	353.783	316.956	359.676	368.483	321.035	316.443	360.854	309.719	308.498	292.079	303.316	0	0	0	0	0	0	0	0	0
2000008	0103S	Avena (Secano)	S	4.5	2241.93	2020.3	2045.87	2813.07	3154.05	895.068	2045.87	2045.87	1960.63	1960.63	1534.4	1619.65	0.143959	0.156241	0.135667	0.16243	0.171606	0.12715	0.139837	0.18026	0.218604	0.167795	0.160668	0.1821	410.806	220.281	224.246	459.545	378.991	101.85	277.163	332.601	414.745	422.358	327.228	335.182	0	149.517	19.8624	0	75.4525	50.389	0	0	0
2000008	0104R	Centeno	R	0	2140.47	0	0	2604.24	2541.81	1962.1	2229.66	2497.22	2140.47	2318.84	2229.66	2586.4	0.143037	0.144979	0.135667	0.182657	0.160774	0.12204	0.146644	0.182346	0.220718	0.170001	0.152223	0.1638	337.537	0	0	366.122	349.068	269.191	407.293	339.596	295.115	318.448	306.956	354.145	0	0	0	0	0	0	0	0	0
2000008	0104S	Centeno (Secano)	S	22.7	1538.42	1538.42	1346.12	1865.34	1826.88	1057.66	1442.27	1730.72	1490.35	1730.72	1538.42	2307.63	0.143037	0.144979	0.135667	0.182657	0.160774	0.12204	0.146644	0.182346	0.220718	0.170001	0.152223	0.1638	181.717	197.215	161.941	286.627	322.321	184.439	205.392	300.684	339.234	388.923	365.066	550.336	171.967	153.702	38.824	0	91.4396	62.7433	0	0	0
2000008	0105S	Triticale (Secano)	S	0.8	1608.94	1966.48	2055.86	2324.02	2860.33	1430.17	2502.79	2502.79	2502.79	1877.09	1877.09	1877.09	0.156166	0.159443	0.147961	0.188715	0.185346	0.154804	0.174972	0.204791	0.22092	0.198886	0.181481	0.1764	236.202	276.786	277.762	304.17	365.691	182.666	319.35	316.857	369.488	223.58	265.18	309.523	0	0	0	0	0	0	0	0	0
2000008	0108R	Maiz	R	51	8716.96	8626.16	8716.96	7445.74	7808.94	8626.16	9261.77	9443.37	8626.16	9170.97	8989.36	10805.4	0.16895	0.149064	0.160998	0.209968	0.182538	0.144484	0.18298	0.215418	0.234614	0.199488	0.170622	0.1729	973.64	943.054	1077.4	1136.72	1122.59	1213.27	1329.19	1646.91	2012.72	2262.85	2104	2721.29	460.553	512.118	117.076	0	115.45	115.838	0	0	0
2000079	1207S	Cerezo (Secano)	S	22.2	2637.66	2491.12	2442.28	1856.13	2735.35	2442.28	2442.28	2344.58	2344.58	1953.82	1543.52	2442.28	1.41529	1.6142	1.74618	2.10225	1.98927	2.09261	1.78085	1.84491	1.90309	2.48914	2.3679	1.7635	643.563	341.078	350.799	624.164	510.386	492.309	493.05	797.315	688.266	1035.83	992.309	856.274	0	0	0	0	0	0	0	0	0
2000008	0203S	Lentejas (Secano)	S	0	502.21	167.403	585.912	837.017	837.017	544.061	669.613	669.613	585.912	920.718	549.083	418.508	0.5414	0.629713	0.644947	0.594483	0.609698	0.609097	0.718606	0.756694	0.800406	0.551626	0.464812	0.5955	231.338	104.355	244.568	485.182	473.943	307.759	352.379	396.548	396.083	763.137	495.882	357.739	144.673	0	0	0	0	0	24.8945	99.5551	86.0419
2000008	0204S	Garbanzos (Secano)	S	0	536.824	447.353	751.554	492.089	805.236	581.559	715.766	536.824	536.824	894.707	608.401	581.559	0.636873	0.574725	0.594708	0.649413	0.659244	0.672021	0.628918	0.64824	0.658732	0.667067	0.551682	0.5891	266.425	170.342	294.918	222.076	290.949	204.209	273.314	234.343	288.176	583.476	389.958	368.197	211.377	161.155	0	0	141.407	153.582	0	0	80.4031
2000008	0205S	Guisantes secos (Secano)	S	3	681.158	510.869	596.013	561.955	936.592	596.013	766.303	766.303	383.151	851.448	468.296	510.869	0.183	0.168498	0.164072	0.226191	0.218243	0.187869	0.2031	0.222072	0.268346	0.260067	0.255984	0.2289	169.145	115.016	129.625	102.531	239.525	127.981	177.331	181.42	115.505	282.754	149.262	167.615	245.306	186.54	95.1786	0	118.359	112.431	50.6398	54.7533	0
2000008	0206R	Veza	R	4.4	1296.02	1296.02	1296.02	1312.22	1458.02	1377.02	1296.02	1296.02	1296.02	1215.02	810.014	850.514	0.200506	0.212333	0.194385	0.248677	0.290256	0.255703	0.240136	0.216113	0.265426	0.309312	0.347277	0.388	226.142	258.917	208.122	204.131	221.559	209.044	196.554	195.019	197.721	184.632	123.392	128.861	0	293.733	0	0	0	0	0	0	0
2000008	0206S	Veza (Secano)	S	4.4	554.452	158.415	554.452	514.849	792.075	554.452	554.452	633.66	356.434	633.66	475.245	475.245	0.200506	0.212333	0.194385	0.248677	0.290256	0.255703	0.240136	0.216113	0.265426	0.309312	0.347277	0.388	123.555	39.0915	107.389	67.5727	101.55	71.015	115.073	80.447	45.8784	81.24	61.0805	60.7503	205.665	183.017	0	0	0	0	0	0	0
2000008	0303R	Patata	R	6	38611.6	37493.6	42068.7	39583	38645	43061.8	38165.2	41995.9	40507.3	39039.3	47134.4	34319.6	0.255555	0.189698	0.283946	0.251141	0.226568	0.150295	0.259555	0.211247	0.248208	0.348929	0.174342	0.2281	2761.71	2898.82	3443.32	3897.99	3599.99	4088.76	3638.98	4277.43	4807.95	4777.71	5594.91	4250.66	0	0	0	0	0	0	0	0	0
2000008	0402R	Remolacha	R	1	67895.8	76985.4	79733.4	80821.8	82531.1	87353.8	89644.5	86851.4	86581	70707.3	76868.5	90638.1	0.0700215	0.0607298	0.0463174	0.0360386	0.0372097	0.0371731	0.0358352	0.0309868	0.034739	0.0341005	0.034587	0.0381	1730.3	1945.42	2053.8	2370.97	2308.49	2379.41	2564.67	2924.77	3463.12	2840.18	2910.22	3756.02	0	6.56986	223.5	0	485.09	1443.1	1288.7	1123.75	982.056
2000008	0409R	Girasol	R	6	2010.14	1835.35	1922.74	1922.74	1931.48	2263.59	2359.73	2534.53	2184.94	2447.13	1747.95	1835.35	0.264769	0.278805	0.234343	0.404844	0.388245	0.225644	0.365759	0.377503	0.503866	0.340705	0.308668	0.364	295.676	304.525	251.525	532.529	372.241	411.695	539.037	646.527	734.261	903.514	679.627	828.277	273.084	149.528	65.8937	0	50.0776	57.2425	0	0	0
2000008	0409S	Girasol (Secano)	S	1	540.219	347.284	617.393	617.393	694.567	478.48	617.393	771.741	463.045	733.154	655.98	617.393	0.264769	0.278805	0.234343	0.404844	0.388245	0.225644	0.365759	0.377503	0.503866	0.340705	0.308668	0.364	98.6291	60.3896	114.418	104.098	152.669	92.2509	137.689	198.553	150.975	248.002	228.736	235.737	194.114	161.928	71.4688	0	63.5273	43.9063	0.650639	0	0
2000008	0606R	Alfalfa	R	216	36172.2	32153.1	36172.2	32153.1	38583.7	36976.1	36976.1	36976.1	32153.1	51846.9	25722.5	25722.5	0.136358	0.138243	0.117224	0.128445	0.167895	0.145286	0.116414	0.139242	0.167351	0.166491	0.148804	0.1513	420.581	437.288	467.721	413.05	697.993	1155.05	822.523	626.49	655.873	1307.51	158.526	718.796	0	0	0	0	16.0774	19.829	0	0	0
2000008	0606S	Alfalfa (Secano)	S	48	11464.8	7643.18	15286.4	11464.8	19107.9	7261.02	13757.7	13757.7	7643.18	16432.8	13757.7	6878.86	0.136358	0.138243	0.117224	0.128445	0.167895	0.145286	0.116414	0.139242	0.167351	0.166491	0.148804	0.1513	168.217	107.52	206.416	149.97	177.607	70.9413	182.141	177.083	105.81	293.045	896.691	127.707	0	0	0	0	107.286	100.508	0	0	0
2000008	0610R	Veza para forraje	R	1.5	20164.9	20164.9	16131.9	20164.9	24197.9	20971.5	20164.9	20164.9	16131.9	24278.5	13873.4	14115.4	0.12058	0.130403	0.109911	0.112223	0.12557	0.133963	0.0985969	0.103289	0.132008	0.12557	0.152524	0.1272	275.462	264.102	202.809	245.581	287.87	249.242	239.42	237.55	192.673	288.83	165.453	206.852	0	0	0	0	0	0	0	0	0
2000008	0610S	Veza para forraje (Secano)	S	10.7	11810	6298.67	11022.7	9448.01	13384.7	6298.67	11810	11810	5905	20313.2	9448.01	9448.01	0.12058	0.130403	0.109911	0.112223	0.12557	0.133963	0.0985969	0.103289	0.132008	0.12557	0.152524	0.1272	233.928	119.617	200.934	166.842	230.884	108.544	213.415	229.981	139.067	500.787	235.013	162.497	0	0	0	0	0	0	0	0	0
2000008	0701R	Col	R	0	35892.3	35892.3	36789.6	36341	39032.9	40019.9	39032.9	37686.9	36341	35892.3	34097.7	34097.7	0.290566	0.355545	0.318393	0.306995	0.300586	0.293176	0.250947	0.245312	0.304898	0.295672	0.271769	0.4429	3130.27	2332.28	2572.82	2964.65	3541.24	3821.51	3104.38	3639.63	2895.95	3776	3660.14	2709.2	0	0	0	0	0	0	0	0	0
2000008	0705R	Lechuga	R	3.2	28682	26202	25417.8	23067.1	22767.9	25054.8	25913.8	25913.8	25327.3	23036.6	20920.6	20920.6	0.370262	0.564456	0.417599	0.432874	0.491449	0.377642	0.468861	0.29795	0.442041	0.418534	0.335916	0.2512	1857.87	1373.46	2417.22	1505.43	2116.98	2557.25	2652.06	2766.72	1621.03	1468.61	1337	1329.78	0	0	0	0	0	0	0	0	0
2000008	0711R	Sandia	R	0	40000	40000	40000	42000	44500	40000	41000	35000	40000	38000	36000	36000	0.202463	0.218627	0.228832	0.24765	0.371897	0.231054	0.401795	0.241638	0.205413	0.272604	0.176353	0.2735	5105.26	4806.29	4845.38	8870.33	9180.63	6034.86	7873.88	4978.69	7524.95	6826.71	6715.89	3871.81	0	0	0	0	0	0	0	0	0
2000008	0723R	Ajo	R	0	8967.39	9375	9211.96	7438.86	10190.2	9945.65	23885.9	9375	9782.61	9375	8152.17	9782.61	0.988823	1.13443	1.48269	1.35448	1.26403	1.20787	1.69567	1.86626	1.35089	1.17737	0.943399	1.3569	2203.55	1704.26	2192.58	2437.52	2971.21	2530.47	7018.88	3196.46	2977.09	4871.98	4039.97	3122.03	246.377	0	0	0	0	0	0	0	0
2000008	0724R	Cebolla	R	0	20651.3	22296.1	22838.5	17180.4	20158.4	20295.8	20731.1	20845.6	20818.1	20272.9	20158.4	19764.4	0.18634	0.175012	0.19873	0.251551	0.164084	0.139574	0.248044	0.173705	0.202694	0.263377	0.181481	0.2555	1683.81	1671.01	1990.46	943.275	1961.66	1648.62	1796.53	1979.34	1120.94	2563.42	2575.19	2938.48	0	0	0	0	0	0	0	0	0
2000008	0732R	Guisantes verdes	R	0	7500	9000	9000	9750	0	0	0	0	0	0	0	0	0.6796	0.661623	0.695398	0.746235	0.73276	0.612003	0.680769	0.598284	0.60325	0.655633	0.615728	0.5243	973.45	1119.97	1075.05	1128.21	0	0	0	0	0	0	0	0	0	0	0	0	0	0	0	0	0
2000008	1201R	Manzano	R	2.9	19758.2	19463.1	21048.6	18515.4	6611.69	18222.7	36353.9	33479.2	18484.9	29444.7	30669.2	34644	0.3622	0.279909	0.313305	0.388313	0.341306	0.261013	0.296591	0.302519	0.388573	0.418333	0.307462	0.3469	2542.68	2227.77	2042.5	6839	1527.14	4179.39	8481.89	7465.18	4828.72	8929.31	10737.3	8637.41	0	0	0	0	0	0	0	0	0
2000008	1202R	Peral	R	0	28304.4	26341.5	27708.2	27033.5	25018.4	30536.1	29444.5	31205.7	26812	27776.6	26962.6	26312.8	0.544509	0.432065	0.4247	0.635142	0.538588	0.477539	0.469161	0.394089	0.459763	0.572388	0.446815	0.5097	3867.07	3427.69	4051.68	11840.4	4150.4	6547.97	5318.35	7323.9	6832.61	6949.58	6305.31	5743	0	115.232	0	238.224	0	0	0	0	0
2000008	1218R	Almendro	R	67	0	2250	2925	2925	3000	3000	3000	3000	2325	2400	2400	2400	1.55314	1.60106	1.02979	0.91113	0.868761	0.617514	0.727415	0.6832	0.903617	1.49862	1.48392	1.8548	0	1335.13	1666.06	1613.95	307.874	642.994	1613.8	1601.2	1258.12	359.859	1296.78	1289.77	273.026	0	0	0	249.686	245.783	0	0	0
2000008	1302R	Vid	R	0	6184.7	6184.7	6397.84	5138.06	5138.06	5737.5	5375.93	6065.76	5518.66	5147.57	3996.27	4510.07	0.476906	0.557499	0.53334	0.563065	0.536381	0.568517	0.618308	0.596894	0.612917	0.619928	0.804649	0.7017	745.296	622.162	909.718	143.802	818.491	764.923	845.684	1234.08	1230.91	1445.25	921.619	967.173	0	0	0	0	0	56.1504	32.3418	0	6.49468
2000008	1302S	Vid (Secano)	S	1	2984.36	4076.37	3512.2	2549.37	2554.42	2775.44	2383.85	2926.83	2298.07	2230.45	1983.18	2148.7	0.476906	0.557499	0.53334	0.563065	0.536381	0.568517	0.618308	0.596894	0.612917	0.619928	0.804649	0.7017	1026.2	1757.4	1964.27	1041.1	713.962	912.694	943.406	1184.08	1121.78	1076.92	1021.17	1205.21	0	0	0	0	0	0	0	0	0
2000009	0101R	Trigo	R	1	4613.78	4613.78	4531.39	4860.95	4613.78	4531.39	4696.17	4654.98	4613.78	5272.89	5016.66	5272.89	0.162961	0.154143	0.147643	0.215924	0.219547	0.160616	0.174271	0.228528	0.249617	0.214031	0.21084	0.2024	482.448	523.374	780.052	810.608	533.687	592.204	663.108	711.933	933.504	1099.88	1082.64	1226.17	273.003	259.901	0	0	43.3779	51.0002	0	0	0
2000009	0101S	Trigo (Secano)	S	37	2124.43	1823.2	1664.66	2695.17	3012.25	1347.59	2298.82	2259.19	2338.46	2536.63	1664.66	2378.09	0.162961	0.154143	0.147643	0.215924	0.219547	0.160616	0.174271	0.228528	0.249617	0.214031	0.21084	0.2024	225.286	188.811	304.972	288.419	405.484	190.085	267.461	310.643	400.473	466.901	292.321	412.964	166.336	159.51	48.9778	0	40.8705	42.7841	0	0	0
2000009	0102R	Cebada	R	0	4692.23	4735.75	4608.59	4950.82	4949.97	4780.13	4779.28	4736.61	4437.9	4693.94	4437.9	4352.56	0.145456	0.146635	0.133229	0.18851	0.170202	0.124946	0.150448	0.193469	0.224847	0.181234	0.163886	0.174	478.883	437.642	385.562	762.018	482.267	560.671	674.435	708.247	878.589	971.994	907.933	1021.45	286.109	241.572	57.5417	0	58.1515	65.4687	0	0	0
2000009	0102S	Cebada (Secano)	S	1	2082.43	1999.13	1955.91	2740.94	3283.16	1483.63	2200.3	2436.05	2003.84	2750.37	1728.81	2128	0.145456	0.146635	0.133229	0.18851	0.170202	0.124946	0.150448	0.193469	0.224847	0.181234	0.163886	0.174	244.922	222.643	225.134	331.619	500.188	212.997	280.445	366.837	366.666	509.64	313.273	396.813	176.321	154.474	41.8553	0	40.8404	46.9423	0	0	0
2000009	0103R	Avena	R	3.9	2838.03	2956.29	2759.2	3232.21	3389.87	2956.29	2916.87	3035.12	2838.03	2838.03	2680.37	2798.62	0.143959	0.156241	0.135667	0.16243	0.171606	0.12715	0.139837	0.18026	0.218604	0.167795	0.160668	0.1821	354.24	353.783	316.956	359.676	368.483	321.035	316.443	360.854	309.719	308.498	292.079	303.316	0	0	0	0	0	0	0	0	0
2000009	0103S	Avena (Secano)	S	1.3	2241.93	2020.3	2045.87	2813.07	3154.05	895.068	2045.87	2045.87	1960.63	1960.63	1534.4	1619.65	0.143959	0.156241	0.135667	0.16243	0.171606	0.12715	0.139837	0.18026	0.218604	0.167795	0.160668	0.1821	410.806	220.281	224.246	459.545	378.991	101.85	277.163	332.601	414.745	422.358	327.228	335.182	0	149.517	19.8624	0	75.4525	50.389	0	0	0
2000009	0104R	Centeno	R	0.1	2140.47	0	0	2604.24	2541.81	1962.1	2229.66	2497.22	2140.47	2318.84	2229.66	2586.4	0.143037	0.144979	0.135667	0.182657	0.160774	0.12204	0.146644	0.182346	0.220718	0.170001	0.152223	0.1638	337.537	0	0	366.122	349.068	269.191	407.293	339.596	295.115	318.448	306.956	354.145	0	0	0	0	0	0	0	0	0
2000009	0104S	Centeno (Secano)	S	0.1	1538.42	1538.42	1346.12	1865.34	1826.88	1057.66	1442.27	1730.72	1490.35	1730.72	1538.42	2307.63	0.143037	0.144979	0.135667	0.182657	0.160774	0.12204	0.146644	0.182346	0.220718	0.170001	0.152223	0.1638	181.717	197.215	161.941	286.627	322.321	184.439	205.392	300.684	339.234	388.923	365.066	550.336	171.967	153.702	38.824	0	91.4396	62.7433	0	0	0
2000009	0105S	Triticale (Secano)	S	0.5	1608.94	1966.48	2055.86	2324.02	2860.33	1430.17	2502.79	2502.79	2502.79	1877.09	1877.09	1877.09	0.156166	0.159443	0.147961	0.188715	0.185346	0.154804	0.174972	0.204791	0.22092	0.198886	0.181481	0.1764	236.202	276.786	277.762	304.17	365.691	182.666	319.35	316.857	369.488	223.58	265.18	309.523	0	0	0	0	0	0	0	0	0
2000009	0108R	Maiz	R	63	8716.96	8626.16	8716.96	7445.74	7808.94	8626.16	9261.77	9443.37	8626.16	9170.97	8989.36	10805.4	0.16895	0.149064	0.160998	0.209968	0.182538	0.144484	0.18298	0.215418	0.234614	0.199488	0.170622	0.1729	973.64	943.054	1077.4	1136.72	1122.59	1213.27	1329.19	1646.91	2012.72	2262.85	2104	2721.29	460.553	512.118	117.076	0	115.45	115.838	0	0	0
2000009	0203S	Lentejas (Secano)	S	0	502.21	167.403	585.912	837.017	837.017	544.061	669.613	669.613	585.912	920.718	549.083	418.508	0.5414	0.629713	0.644947	0.594483	0.609698	0.609097	0.718606	0.756694	0.800406	0.551626	0.464812	0.5955	231.338	104.355	244.568	485.182	473.943	307.759	352.379	396.548	396.083	763.137	495.882	357.739	144.673	0	0	0	0	0	24.8945	99.5551	86.0419
2000009	0204S	Garbanzos (Secano)	S	1	536.824	447.353	751.554	492.089	805.236	581.559	715.766	536.824	536.824	894.707	608.401	581.559	0.636873	0.574725	0.594708	0.649413	0.659244	0.672021	0.628918	0.64824	0.658732	0.667067	0.551682	0.5891	266.425	170.342	294.918	222.076	290.949	204.209	273.314	234.343	288.176	583.476	389.958	368.197	211.377	161.155	0	0	141.407	153.582	0	0	80.4031
2000009	0205S	Guisantes secos (Secano)	S	0	681.158	510.869	596.013	561.955	936.592	596.013	766.303	766.303	383.151	851.448	468.296	510.869	0.183	0.168498	0.164072	0.226191	0.218243	0.187869	0.2031	0.222072	0.268346	0.260067	0.255984	0.2289	169.145	115.016	129.625	102.531	239.525	127.981	177.331	181.42	115.505	282.754	149.262	167.615	245.306	186.54	95.1786	0	118.359	112.431	50.6398	54.7533	0
2000009	0303R	Patata	R	0	38611.6	37493.6	42068.7	39583	38645	43061.8	38165.2	41995.9	40507.3	39039.3	47134.4	34319.6	0.255555	0.189698	0.283946	0.251141	0.226568	0.150295	0.259555	0.211247	0.248208	0.348929	0.174342	0.2281	2761.71	2898.82	3443.32	3897.99	3599.99	4088.76	3638.98	4277.43	4807.95	4777.71	5594.91	4250.66	0	0	0	0	0	0	0	0	0
2000009	0402R	Remolacha	R	0	67895.8	76985.4	79733.4	80821.8	82531.1	87353.8	89644.5	86851.4	86581	70707.3	76868.5	90638.1	0.0700215	0.0607298	0.0463174	0.0360386	0.0372097	0.0371731	0.0358352	0.0309868	0.034739	0.0341005	0.034587	0.0381	1730.3	1945.42	2053.8	2370.97	2308.49	2379.41	2564.67	2924.77	3463.12	2840.18	2910.22	3756.02	0	6.56986	223.5	0	485.09	1443.1	1288.7	1123.75	982.056
2000009	0409R	Girasol	R	9	2010.14	1835.35	1922.74	1922.74	1931.48	2263.59	2359.73	2534.53	2184.94	2447.13	1747.95	1835.35	0.264769	0.278805	0.234343	0.404844	0.388245	0.225644	0.365759	0.377503	0.503866	0.340705	0.308668	0.364	295.676	304.525	251.525	532.529	372.241	411.695	539.037	646.527	734.261	903.514	679.627	828.277	273.084	149.528	65.8937	0	50.0776	57.2425	0	0	0
2000009	0409S	Girasol (Secano)	S	1	540.219	347.284	617.393	617.393	694.567	478.48	617.393	771.741	463.045	733.154	655.98	617.393	0.264769	0.278805	0.234343	0.404844	0.388245	0.225644	0.365759	0.377503	0.503866	0.340705	0.308668	0.364	98.6291	60.3896	114.418	104.098	152.669	92.2509	137.689	198.553	150.975	248.002	228.736	235.737	194.114	161.928	71.4688	0	63.5273	43.9063	0.650639	0	0
2000009	0606R	Alfalfa	R	1	36172.2	32153.1	36172.2	32153.1	38583.7	36976.1	36976.1	36976.1	32153.1	51846.9	25722.5	25722.5	0.136358	0.138243	0.117224	0.128445	0.167895	0.145286	0.116414	0.139242	0.167351	0.166491	0.148804	0.1513	420.581	437.288	467.721	413.05	697.993	1155.05	822.523	626.49	655.873	1307.51	158.526	718.796	0	0	0	0	16.0774	19.829	0	0	0
2000009	0606S	Alfalfa (Secano)	S	6	11464.8	7643.18	15286.4	11464.8	19107.9	7261.02	13757.7	13757.7	7643.18	16432.8	13757.7	6878.86	0.136358	0.138243	0.117224	0.128445	0.167895	0.145286	0.116414	0.139242	0.167351	0.166491	0.148804	0.1513	168.217	107.52	206.416	149.97	177.607	70.9413	182.141	177.083	105.81	293.045	896.691	127.707	0	0	0	0	107.286	100.508	0	0	0
2000009	0610R	Veza para forraje	R	24.9	20164.9	20164.9	16131.9	20164.9	24197.9	20971.5	20164.9	20164.9	16131.9	24278.5	13873.4	14115.4	0.12058	0.130403	0.109911	0.112223	0.12557	0.133963	0.0985969	0.103289	0.132008	0.12557	0.152524	0.1272	275.462	264.102	202.809	245.581	287.87	249.242	239.42	237.55	192.673	288.83	165.453	206.852	0	0	0	0	0	0	0	0	0
2000009	0610S	Veza para forraje (Secano)	S	3.5	11810	6298.67	11022.7	9448.01	13384.7	6298.67	11810	11810	5905	20313.2	9448.01	9448.01	0.12058	0.130403	0.109911	0.112223	0.12557	0.133963	0.0985969	0.103289	0.132008	0.12557	0.152524	0.1272	233.928	119.617	200.934	166.842	230.884	108.544	213.415	229.981	139.067	500.787	235.013	162.497	0	0	0	0	0	0	0	0	0
2000009	0701R	Col	R	0	35892.3	35892.3	36789.6	36341	39032.9	40019.9	39032.9	37686.9	36341	35892.3	34097.7	34097.7	0.290566	0.355545	0.318393	0.306995	0.300586	0.293176	0.250947	0.245312	0.304898	0.295672	0.271769	0.4429	3130.27	2332.28	2572.82	2964.65	3541.24	3821.51	3104.38	3639.63	2895.95	3776	3660.14	2709.2	0	0	0	0	0	0	0	0	0
2000009	0711R	Sandia	R	0	40000	40000	40000	42000	44500	40000	41000	35000	40000	38000	36000	36000	0.202463	0.218627	0.228832	0.24765	0.371897	0.231054	0.401795	0.241638	0.205413	0.272604	0.176353	0.2735	5105.26	4806.29	4845.38	8870.33	9180.63	6034.86	7873.88	4978.69	7524.95	6826.71	6715.89	3871.81	0	0	0	0	0	0	0	0	0
2000009	0723R	Ajo	R	0	8967.39	9375	9211.96	7438.86	10190.2	9945.65	23885.9	9375	9782.61	9375	8152.17	9782.61	0.988823	1.13443	1.48269	1.35448	1.26403	1.20787	1.69567	1.86626	1.35089	1.17737	0.943399	1.3569	2203.55	1704.26	2192.58	2437.52	2971.21	2530.47	7018.88	3196.46	2977.09	4871.98	4039.97	3122.03	246.377	0	0	0	0	0	0	0	0
2000009	0724R	Cebolla	R	0	20651.3	22296.1	22838.5	17180.4	20158.4	20295.8	20731.1	20845.6	20818.1	20272.9	20158.4	19764.4	0.18634	0.175012	0.19873	0.251551	0.164084	0.139574	0.248044	0.173705	0.202694	0.263377	0.181481	0.2555	1683.81	1671.01	1990.46	943.275	1961.66	1648.62	1796.53	1979.34	1120.94	2563.42	2575.19	2938.48	0	0	0	0	0	0	0	0	0
2000009	0732R	Guisantes verdes	R	0	7500	9000	9000	9750	0	0	0	0	0	0	0	0	0.6796	0.661623	0.695398	0.746235	0.73276	0.612003	0.680769	0.598284	0.60325	0.655633	0.615728	0.5243	973.45	1119.97	1075.05	1128.21	0	0	0	0	0	0	0	0	0	0	0	0	0	0	0	0	0
2000009	1201R	Manzano	R	0.2	19758.2	19463.1	21048.6	18515.4	6611.69	18222.7	36353.9	33479.2	18484.9	29444.7	30669.2	34644	0.3622	0.279909	0.313305	0.388313	0.341306	0.261013	0.296591	0.302519	0.388573	0.418333	0.307462	0.3469	2542.68	2227.77	2042.5	6839	1527.14	4179.39	8481.89	7465.18	4828.72	8929.31	10737.3	8637.41	0	0	0	0	0	0	0	0	0
2000009	1202R	Peral	R	0	28304.4	26341.5	27708.2	27033.5	25018.4	30536.1	29444.5	31205.7	26812	27776.6	26962.6	26312.8	0.544509	0.432065	0.4247	0.635142	0.538588	0.477539	0.469161	0.394089	0.459763	0.572388	0.446815	0.5097	3867.07	3427.69	4051.68	11840.4	4150.4	6547.97	5318.35	7323.9	6832.61	6949.58	6305.31	5743	0	115.232	0	238.224	0	0	0	0	0
2000009	1218S	Almendro (Secano)	S	0.3	312.5	437.5	1250	1250	1250	1250	1250	1250	875	937.5	937.5	937.5	1.55314	1.60106	1.02979	0.91113	0.868761	0.617514	0.727415	0.6832	0.903617	1.49862	1.48392	1.8548	246.714	331.156	908.216	879.806	859.426	858.58	857.735	851.037	603.979	297.419	396.717	642.669	0	0	0	0	0	0	0	0	0
2000009	1302R	Vid	R	0	6184.7	6184.7	6397.84	5138.06	5138.06	5737.5	5375.93	6065.76	5518.66	5147.57	3996.27	4510.07	0.476906	0.557499	0.53334	0.563065	0.536381	0.568517	0.618308	0.596894	0.612917	0.619928	0.804649	0.7017	745.296	622.162	909.718	143.802	818.491	764.923	845.684	1234.08	1230.91	1445.25	921.619	967.173	0	0	0	0	0	56.1504	32.3418	0	6.49468
2000009	1302S	Vid (Secano)	S	0	2984.36	4076.37	3512.2	2549.37	2554.42	2775.44	2383.85	2926.83	2298.07	2230.45	1983.18	2148.7	0.476906	0.557499	0.53334	0.563065	0.536381	0.568517	0.618308	0.596894	0.612917	0.619928	0.804649	0.7017	1026.2	1757.4	1964.27	1041.1	713.962	912.694	943.406	1184.08	1121.78	1076.92	1021.17	1205.21	0	0	0	0	0	0	0	0	0
2000011	0101R	Trigo	R	229	6075.15	3442.01	4516.56	5700.83	5937.47	3775.46	5087.72	5378.14	4631.66	5516.9	4291.76	5776.12	0.162961	0.154143	0.147643	0.215924	0.219547	0.160616	0.174271	0.228528	0.249617	0.214031	0.21084	0.2024	635.259	390.452	860.412	1052.04	686.801	493.411	718.395	822.533	937.12	1150.78	926.202	1343.2	273.003	259.901	0	0	43.3779	51.0002	0	0	0
2000011	0101S	Trigo (Secano)	S	922	3420.36	1176.49	2029.97	3957.27	4492.03	1689.86	3101.64	3754.06	2381.85	4226.79	2802.17	2962.6	0.162961	0.154143	0.147643	0.215924	0.219547	0.160616	0.174271	0.228528	0.249617	0.214031	0.21084	0.2024	362.714	121.837	371.897	605.322	604.68	238.365	360.867	516.19	407.904	777.998	492.072	514.467	166.336	159.51	48.9778	0	40.8705	42.7841	0	0	0
2000011	0102R	Cebada	R	230	5650.03	3451.54	4488.4	5603.78	5840.4	3931.25	4829.36	5302.61	4413.11	5182.15	3721.51	5259.59	0.145456	0.146635	0.133229	0.18851	0.170202	0.124946	0.150448	0.193469	0.224847	0.181234	0.163886	0.174	576.635	318.965	375.507	955.961	569.021	461.103	681.502	792.88	873.68	1073.09	761.369	1234.31	286.109	241.572	57.5417	0	58.1515	65.4687	0	0	0
2000011	0102S	Cebada (Secano)	S	1035	3069.38	1277.68	2231.99	3802.49	4359.7	1704.28	3023.04	3111.51	2130.87	4053.18	2359.44	2601.71	0.145456	0.146635	0.133229	0.18851	0.170202	0.124946	0.150448	0.193469	0.224847	0.181234	0.163886	0.174	361.001	142.295	256.912	595.126	664.198	244.674	385.31	468.554	389.909	751.049	427.549	485.145	176.321	154.474	41.8553	0	40.8404	46.9423	0	0	0
2000011	0103R	Avena	R	32.8	3515.54	2450.23	2982.88	4101.46	4431.71	2471.53	3696.64	4279.37	3350.42	4458.34	1954.85	2759.17	0.143959	0.156241	0.135667	0.16243	0.171606	0.12715	0.139837	0.18026	0.218604	0.167795	0.160668	0.1821	520.527	347.831	406.465	541.406	571.449	318.379	475.727	508.787	433.731	574.883	252.692	354.733	0	0	0	0	0	0	0	0	0
2000011	0103S	Avena (Secano)	S	45	1301.65	833.059	1561.98	2551.24	3030.25	864.298	2020.17	2852.18	1502.63	2858.43	1249.59	1301.65	0.143959	0.156241	0.135667	0.16243	0.171606	0.12715	0.139837	0.18026	0.218604	0.167795	0.160668	0.1821	205.436	90.8316	171.208	358.975	364.115	98.3488	273.681	463.686	317.862	615.764	266.488	269.374	0	149.517	19.8624	0	75.4525	50.389	0	0	0
2000011	0104R	Centeno	R	2.9	3590.26	2611.1	1958.32	3916.65	4395.35	2524.06	4427.99	4351.83	4337.69	5153.66	3976.49	4547.66	0.143037	0.144979	0.135667	0.182657	0.160774	0.12204	0.146644	0.182346	0.220718	0.170001	0.152223	0.1638	987.545	688.597	495.736	960.458	1052.88	604.029	808.863	1032.28	1043.18	1234.53	954.897	1086.15	0	0	0	0	0	0	0	0	0
2000011	0104S	Centeno (Secano)	S	3.8	1191.38	704	1516.31	2610.21	2967.63	996.43	1700.43	3049.94	1914.88	3891.49	2220.31	2166.15	0.143037	0.144979	0.135667	0.182657	0.160774	0.12204	0.146644	0.182346	0.220718	0.170001	0.152223	0.1638	140.726	90.2479	182.415	472.028	523.588	173.761	242.156	529.877	435.867	874.484	526.876	516.595	171.967	153.702	38.824	0	91.4396	62.7433	0	0	0
2000011	0105S	Triticale (Secano)	S	5.2	1392.66	1285.53	1928.3	3213.83	3428.09	1285.53	2892.45	2678.19	2502.51	3428.09	2142.56	2142.56	0.156166	0.159443	0.147961	0.188715	0.185346	0.154804	0.174972	0.204791	0.22092	0.198886	0.181481	0.1764	233.801	206.917	297.928	481.014	501.197	187.764	422.053	387.738	369.446	408.319	302.683	353.296	0	0	0	0	0	0	0	0	0
2000011	0108R	Maiz	R	385	11566.9	10377.8	12431.7	11350.7	10810.2	10810.2	10810.2	11891.2	11891.2	11891.2	11891.2	12972.2	0.16895	0.149064	0.160998	0.209968	0.182538	0.144484	0.18298	0.215418	0.234614	0.199488	0.170622	0.1729	1291.97	1134.55	1536.54	2235.99	1554.04	1520.45	1551.41	2073.81	2774.55	2934.05	2783.19	3267	460.553	512.118	117.076	0	115.45	115.838	0	0	0
2000094	1207S	Cerezo (Secano)	S	7.7	2196.25	1757	2306.06	1976.62	0	2745.31	3843.43	3294.37	3294.37	3294.37	3294.37	3294.37	1.41529	1.6142	1.74618	2.10225	1.98927	2.09261	1.78085	1.84491	1.90309	2.48914	2.3679	1.7635	643.563	341.078	350.799	624.164	510.386	492.309	493.05	797.315	688.266	1035.83	992.309	856.274	0	0	0	0	0	0	0	0	0
2000011	0203S	Lentejas (Secano)	S	0.8	1087.2	434.881	744.734	424.009	1087.2	434.881	1087.2	1087.2	652.322	1848.24	326.161	434.881	0.5414	0.629713	0.644947	0.594483	0.609698	0.609097	0.718606	0.756694	0.800406	0.551626	0.464812	0.5955	500.809	392.326	310.863	355.692	890.903	356.01	572.132	643.847	440.977	1531.92	294.559	371.734	144.673	0	0	0	0	0	24.8945	99.5551	86.0419
2000011	0204S	Garbanzos (Secano)	S	18.5	949.215	421.873	764.645	210.937	775.192	632.81	843.747	1054.68	843.747	949.215	527.342	632.81	0.636873	0.574725	0.594708	0.649413	0.659244	0.672021	0.628918	0.64824	0.658732	0.667067	0.551682	0.5891	471.094	160.64	300.055	106.445	280.093	222.205	322.184	514.822	452.937	619.023	338.003	400.645	211.377	161.155	0	0	141.407	153.582	0	0	80.4031
2000011	0205R	Guisante seco	R	1.3	2187.37	1640.53	2734.22	858.544	2734.22	1968.64	3281.06	3281.06	2187.37	3281.06	2187.37	1640.53	0.183	0.168498	0.164072	0.226191	0.218243	0.187869	0.2031	0.222072	0.268346	0.260067	0.255984	0.2289	349.478	275.811	447.992	213.758	664.988	343.43	826.07	790.197	534.096	797.986	533.305	397.816	354.829	263.037	125.174	0	0	167.83	55.1042	0	0
2000011	0205S	Guisantes secos (Secano)	S	0	1510.55	323.69	1456.6	253.557	1402.66	431.586	1078.97	1618.45	863.173	1834.24	863.173	863.173	0.183	0.168498	0.164072	0.226191	0.218243	0.187869	0.2031	0.222072	0.268346	0.260067	0.255984	0.2289	375.099	72.8748	316.792	79.3318	358.717	92.6738	249.685	383.164	260.213	609.127	275.122	283.206	245.306	186.54	95.1786	0	118.359	112.431	50.6398	54.7533	0
2000011	0206R	Veza	R	8.9	2016.21	1379.51	2759.02	848.929	2865.14	1910.09	2652.9	2652.9	2122.32	2334.56	1591.74	1591.74	0.200506	0.212333	0.194385	0.248677	0.290256	0.255703	0.240136	0.216113	0.265426	0.309312	0.347277	0.388	557.303	275.596	701.853	209.199	689.693	459.343	637.348	632.371	512.906	561.972	384.109	382.033	0	293.733	0	0	0	0	0	0	0
2000011	0206S	Veza (Secano)	S	73.5	1441.26	308.841	1029.47	324.283	1338.31	308.841	1029.47	1338.31	720.629	1544.2	926.523	411.788	0.200506	0.212333	0.194385	0.248677	0.290256	0.255703	0.240136	0.216113	0.265426	0.309312	0.347277	0.388	321.173	76.2115	199.393	71.4165	287.907	66.3747	213.659	285.097	155.641	332.201	199.813	88.3257	205.665	183.017	0	0	0	0	0	0	0
2000011	0303R	Patata	R	9	45963.4	44508.8	43563.3	45488	41104.6	55290.3	46680.9	54989.6	50132.9	50943.8	55823.3	50381.5	0.255555	0.189698	0.283946	0.251141	0.226568	0.150295	0.259555	0.211247	0.248208	0.348929	0.174342	0.2281	3287.55	3441.2	3565.66	5435.57	3829.11	5249.86	4450.95	5600.87	5950.45	6234.61	6626.29	6240	0	0	0	0	0	0	0	0	0
2000011	0402R	Remolacha	R	50	86783.2	91805.5	90012.6	102628	99366	97205.9	89645.4	116083	100898	89579.5	115508	108159	0.0700215	0.0607298	0.0463174	0.0360386	0.0372097	0.0371731	0.0358352	0.0309868	0.034739	0.0341005	0.034587	0.0381	2211.64	2319.93	2318.57	3774.51	2779.38	2647.78	2564.69	3909.17	4035.76	3598.24	4373.08	4482.07	0	6.56986	223.5	0	485.09	1443.1	1288.7	1123.75	982.056
2000011	0409R	Girasol	R	157	2121.49	1697.19	2333.64	2545.79	2757.94	2651.86	3182.23	2651.86	2121.49	2651.86	2333.64	2121.49	0.264769	0.278805	0.234343	0.404844	0.388245	0.225644	0.365759	0.377503	0.503866	0.340705	0.308668	0.364	312.054	281.602	305.276	776.5	531.517	482.312	726.923	676.457	712.939	979.103	907.35	957.411	273.084	149.528	65.8937	0	50.0776	57.2425	0	0	0
2000011	0409S	Girasol (Secano)	S	359	723.712	465.243	878.793	961.503	1137.26	413.55	1240.65	1240.65	599.647	1344.04	827.099	827.099	0.264769	0.278805	0.234343	0.404844	0.388245	0.225644	0.365759	0.377503	0.503866	0.340705	0.308668	0.364	132.13	80.9018	162.861	225.585	249.975	79.7324	276.685	319.193	195.514	454.644	288.405	315.808	194.114	161.928	71.4688	0	63.5273	43.9063	0.650639	0	0
2000011	0421R	Colza	R	19.9	2057.34	1949.06	2273.9	3540.79	3681.56	2707.03	3248.43	4331.25	2490.47	4872.65	3248.43	4331.25	0	0	0	0	0	0	0	0	0	0.336994	0.327772	0	1177.63	1069.65	1197.87	1806.91	1835.23	1348.1	1616.13	2138.02	1246.39	1948.26	1286.56	1717.06	0	0	0	0	0	0	0	0	0
2000011	0421S	Colza (Secano)	S	28.1	1227.64	960.76	1174.26	2412.58	2775.53	640.507	1281.01	1921.52	1067.51	3202.53	1067.51	1281.01	0	0	0	0	0	0	0	0	0	0.336994	0.327772	0	593.027	444.969	522.041	1039.01	1167.63	269.187	537.845	800.467	450.865	1334.69	402.062	491.096	0	0	0	0	0	0	0	0	0
2000011	0602R	Maíz forrajero	R	8.8	61140	52706.9	69046	66410.7	66410.7	0	73789.7	73789.7	66410.7	57977.6	57977.6	79060.4	0.0413174	0.0364542	0.0393728	0.0513487	0.0446405	0.0353342	0.0447485	0.0526814	0.0573758	0.0487857	0.0478587	0.0318	2089.52	1727.03	2171.67	2023.44	1976.57	0	2191.87	2174.75	1984.4	1822.95	1340.58	2315.97	0	0	0	0	0	0	0	0	0
2000011	0606R	Alfalfa	R	238	42341.5	39165.9	42341.5	40891.3	40224.4	37048.8	42341.5	38107.4	38107.4	37048.8	52926.9	52926.9	0.136358	0.138243	0.117224	0.128445	0.167895	0.145286	0.116414	0.139242	0.167351	0.166491	0.148804	0.1513	492.312	532.663	547.492	662.889	727.674	1157.32	941.876	645.658	777.33	934.322	326.184	1479	0	0	0	0	16.0774	19.829	0	0	0
2000011	0606S	Alfalfa (Secano)	S	375	10125.1	7087.57	14175.1	14175.1	14175.1	9112.59	15187.6	8606.33	8606.33	15187.6	10125.1	10125.1	0.136358	0.138243	0.117224	0.128445	0.167895	0.145286	0.116414	0.139242	0.167351	0.166491	0.148804	0.1513	152.13	102.1	196.01	189.879	131.757	89.0314	201.073	110.777	119.144	270.84	659.926	187.974	0	0	0	0	107.286	100.508	0	0	0
2000011	0610R	Veza para forraje	R	18.1	24439.7	23377.1	40378.6	25236.7	25502.3	10626	25502.3	21251.9	21251.9	26564.9	26564.9	23377.1	0.12058	0.130403	0.109911	0.112223	0.12557	0.133963	0.0985969	0.103289	0.132008	0.12557	0.152524	0.1272	432.415	396.558	657.494	398.079	392.951	163.569	392.178	324.263	328.756	409.324	410.336	342.577	0	0	0	0	0	0	0	0	0
2000011	0610S	Veza para forraje (Secano)	S	324.2	14411.5	9264.57	18529.1	13382.1	13382.1	1801.44	12352.8	7205.77	7205.77	10294	10294	10294	0.12058	0.130403	0.109911	0.112223	0.12557	0.133963	0.0985969	0.103289	0.132008	0.12557	0.152524	0.1272	339.408	209.193	401.607	280.977	274.468	36.9112	223.222	140.321	169.701	253.78	256.056	210.507	0	0	0	0	0	0	0	0	0
2000011	0701R	Col	R	0	39600	42900	44000	39121.5	52895.7	52800	52250	49500	49500	44000	66000	55000	0.290566	0.355545	0.318393	0.306995	0.300586	0.293176	0.250947	0.245312	0.304898	0.295672	0.271769	0.4429	3453.63	2787.64	3077.06	4333.86	4798.93	5041.87	5643.02	4780.48	3944.57	4628.96	7084.61	5934.19	0	0	0	0	0	0	0	0	0
2000011	0711R	Sandia	R	0	17600	20900	25300	26400	26400	26400	26400	35200	67100	67100	67100	67100	0.202463	0.218627	0.228832	0.24765	0.371897	0.231054	0.401795	0.241638	0.205413	0.272604	0.176353	0.2735	2246.32	2511.29	3064.7	5658.54	5527.47	3983.01	5070.01	5007.14	12623.1	12054.5	12517.7	7216.63	0	0	0	0	0	0	0	0	0
2000011	0712R	Melón	R	0	19105.3	19105.3	22289.5	23350.9	23350.9	23881.6	33294.1	22289.5	24412.3	24412.3	24412.3	24412.3	0.342507	0.28532	0.328674	0.355663	0.421844	0.301493	0.370564	0.258124	0.275395	0.336392	0.26463	0.4248	3336.45	3596.68	3726.42	4717.67	3867.4	4800.02	5875.62	3479.97	3906.85	4030.53	4322.12	5413.77	59.3455	0	0	0	0	32.8045	0	0	0
2000011	0723R	Ajo	R	0	10724.1	8579.28	12868.9	10724.1	11796.5	11796.5	12064.6	12332.7	8579.28	12868.9	11796.5	11796.5	0.988823	1.13443	1.48269	1.35448	1.26403	1.20787	1.69567	1.86626	1.35089	1.17737	0.943399	1.3569	2635.23	1559.6	3062.99	4015.86	3439.56	3001.39	3545.19	4204.91	2610.89	6687.69	5845.99	4302.4	246.377	0	0	0	0	0	0	0	0
2000011	0724R	Cebolla	R	0	49323.6	52611.8	60284.4	55516.4	60284.4	42747.1	41651	42747.1	49323.6	49323.6	49323.6	38362.8	0.18634	0.175012	0.19873	0.251551	0.164084	0.139574	0.248044	0.173705	0.202694	0.263377	0.181481	0.2555	4021.6	3943.07	5254	6883.45	5866.42	3472.33	3609.43	4058.95	5997.59	6236.76	6300.98	5703.62	0	0	0	0	0	0	0	0	0
2000011	0732R	Guisantes verdes	R	0	8709.3	8164.97	8709.3	3048.26	7620.64	7620.64	6046.43	7620.64	7620.64	7620.64	7832.93	6531.98	0.6796	0.661623	0.695398	0.746235	0.73276	0.612003	0.680769	0.598284	0.60325	0.655633	0.615728	0.5243	1028.01	924.015	946.088	320.773	783.355	782.584	620.314	775.709	786.456	783.355	807.167	581.134	0	0	0	0	0	0	0	0	0
2000011	1201R	Manzano	R	1	13505.8	9265.3	13090	17121.5	15812.5	13750	12875.5	12650	13750	13750	6002.7	6002.7	0.3622	0.279909	0.313305	0.388313	0.341306	0.261013	0.296591	0.302519	0.388573	0.418333	0.307462	0.3469	1738.06	1060.52	1270.22	3308.91	3652.3	3153.57	3004.04	2820.69	3591.84	4169.79	2101.54	1496.59	0	0	0	0	0	0	0	0	0
2000011	1202R	Peral	R	0	19360	9999	19250	19800	17424	33000	27896	27500	31240	31108	0	0	0.544509	0.432065	0.4247	0.635142	0.538588	0.477539	0.469161	0.394089	0.459763	0.572388	0.446815	0.5097	2645.05	1301.12	2814.87	6247.45	2890.54	7076.32	5038.66	6454.17	7961.02	7783.08	0	0	0	115.232	0	238.224	0	0	0	0	0
2000011	1218S	Almendro (Secano)	S	1.6	838.095	628.571	1466.67	1236.19	1257.14	2095.24	2189.52	2095.24	1396.48	1396.48	1745.33	1745.33	1.55314	1.60106	1.02979	0.91113	0.868761	0.617514	0.727415	0.6832	0.903617	1.49862	1.48392	1.8548	758.412	545.353	1221.46	997.31	990.72	1649.57	1722.11	1635.08	1104.88	443.028	738.564	1371.39	0	0	0	0	0	0	0	0	0
2000011	1302R	Vid	R	0	8846.23	6976.69	8284.82	7369.13	5450.54	4360.43	12007.5	9814.24	9810.97	13847.6	10554.4	9643.1	0.476906	0.557499	0.53334	0.563065	0.536381	0.568517	0.618308	0.596894	0.612917	0.619928	0.804649	0.7017	1066.03	701.834	1178.03	206.244	868.269	581.332	1888.9	1996.71	2188.29	3887.9	2434.06	2067.94	0	0	0	0	0	56.1504	32.3418	0	6.49468
2000011	1302S	Vid (Secano)	S	52	5097.88	3687.83	4555.55	3931.88	2928.57	2332.01	7375.66	4661.85	5287.7	6312.7	6724.86	5965.61	0.476906	0.557499	0.53334	0.563065	0.536381	0.568517	0.618308	0.596894	0.612917	0.619928	0.804649	0.7017	1752.95	1589.89	2547.79	2812.52	818.539	766.873	2918.91	1886	2581.14	3047.93	3462.72	3346.12	0	0	0	0	0	0	0	0	0
2000011	1402R	Olivar	R	0	1516.7	541.679	5335.53	4116.76	2708.39	3791.75	6608.48	1950.04	1920.79	3791.75	2987.9	3352.99	2.71019	3.28732	3.45681	2.54235	2.37026	1.95638	1.88335	1.77595	1.90863	2.52672	2.16219	3.19687	531.378	181.952	1720.35	1285.85	826.361	1155.77	2012.35	589.173	588.375	1137.82	956.871	854.78	0	0	0	0	0	0	0	0	0
2000011	1402S	Olivar (Secano)	S	0	1760	880	1870	1650	2860	2860	10901	0	0	6050	0	0	2.71019	3.28732	3.45681	2.54235	2.37026	1.95638	1.88335	1.77595	1.90863	2.52672	2.16219	3.19687	195.394	97.2335	243.548	706.225	446.901	431.505	1400.98	0	0	1882.34	0	0	139.79	210.147	152.583	0	74.0082	79.2558	3.9639	0	6.89745
2000012	0101R	Trigo	R	266	3931.68	3570.43	4911.69	4378.76	4814.23	3129.61	4018.41	4323.33	4459.24	4462.82	3129.61	4469.97	0.162961	0.154143	0.147643	0.215924	0.219547	0.160616	0.174271	0.228528	0.249617	0.214031	0.21084	0.2024	411.123	405.019	734.58	634.391	556.873	409.005	567.407	661.21	902.235	930.909	675.399	1039.46	273.003	259.901	0	0	43.3779	51.0002	0	0	0
2000012	0101S	Trigo (Secano)	S	80	1874.24	1216.24	2091.24	2698.49	3499.98	922.245	1749.12	2708.11	2355.49	3305.73	1946.86	2162.99	0.162961	0.154143	0.147643	0.215924	0.219547	0.160616	0.174271	0.228528	0.249617	0.214031	0.21084	0.2024	198.755	125.954	383.122	309.275	471.138	130.088	203.504	372.37	403.39	608.465	341.876	375.611	166.336	159.51	48.9778	0	40.8705	42.7841	0	0	0
2000012	0102R	Cebada	R	52	4360.92	3380.56	4648.27	4378.67	5070.84	2957.99	3617.2	3858.07	4228.24	4225.7	2957.99	4225.7	0.145456	0.146635	0.133229	0.18851	0.170202	0.124946	0.150448	0.193469	0.224847	0.181234	0.163886	0.174	445.071	312.406	388.882	596.289	494.044	346.948	510.446	576.882	837.081	875.034	605.163	991.677	286.109	241.572	57.5417	0	58.1515	65.4687	0	0	0
2000012	0102S	Cebada (Secano)	S	30	2094.42	1435.69	2195.77	2550.47	3631.46	760.073	1781.95	2297.11	1909.47	3155.15	1435.69	1885.82	0.145456	0.146635	0.133229	0.18851	0.170202	0.124946	0.150448	0.193469	0.224847	0.181234	0.163886	0.174	246.333	159.893	252.742	296.926	553.251	109.12	227.123	345.915	349.397	584.644	260.158	351.653	176.321	154.474	41.8553	0	40.8404	46.9423	0	0	0
2000012	0103R	Avena	R	7.8	2495.69	2673.96	3387.01	2852.22	3565.28	2406.56	3297.88	3563.49	3558.15	3565.28	3119.62	3565.28	0.143959	0.156241	0.135667	0.16243	0.171606	0.12715	0.139837	0.18026	0.218604	0.167795	0.160668	0.1821	342.802	352.141	428.158	349.275	426.481	287.591	393.718	423.674	427.312	426.481	374.092	425.223	0	0	0	0	0	0	0	0	0
2000012	0103S	Avena (Secano)	S	0.8	1515.44	1136.58	1704.87	1989.01	2841.44	568.289	1704.87	1989.01	1465.24	2792.19	1139.42	1407.46	0.143959	0.156241	0.135667	0.16243	0.171606	0.12715	0.139837	0.18026	0.218604	0.167795	0.160668	0.1821	221.02	123.925	186.869	258.621	341.428	64.6658	230.966	323.358	309.952	601.494	242.994	291.271	0	149.517	19.8624	0	75.4525	50.389	0	0	0
2000012	0104R	Centeno	R	4.7	2083.41	2500.1	2500.1	2666.77	2916.78	2083.41	2083.41	3333.46	2909.28	3333.46	2916.78	2916.78	0.143037	0.144979	0.135667	0.182657	0.160774	0.12204	0.146644	0.182346	0.220718	0.170001	0.152223	0.1638	374.381	430.731	413.457	427.225	456.453	325.717	380.578	516.569	457.081	521.661	457.581	455.107	0	0	0	0	0	0	0	0	0
2000012	0104S	Centeno (Secano)	S	0.9	1409.1	874.615	1166.15	971.794	2429.48	777.435	1360.51	1797.82	1370.23	3022.28	1382.86	1698.7	0.143037	0.144979	0.135667	0.182657	0.160774	0.12204	0.146644	0.182346	0.220718	0.170001	0.152223	0.1638	166.442	112.12	140.291	132.288	428.641	135.572	193.749	312.341	311.893	679.157	328.152	405.114	171.967	153.702	38.824	0	91.4396	62.7433	0	0	0
2000012	0105S	Triticale (Secano)	S	2.3	1278.48	730.559	913.199	913.199	2283	730.559	1278.48	1643.76	1369.8	1378.02	1643.76	1095.84	0.156166	0.159443	0.147961	0.188715	0.185346	0.154804	0.174972	0.204791	0.22092	0.198886	0.181481	0.1764	121.992	66.8351	80.1934	77.6849	189.713	60.6485	106.03	135.26	202.224	164.135	232.217	180.698	0	0	0	0	0	0	0	0	0
2000012	0108R	Maiz	R	414	8855.98	7681.21	9036.71	9036.71	9940.38	8584.88	9940.38	10844.1	9945.81	10416.6	10573	11747.7	0.16895	0.149064	0.160998	0.209968	0.182538	0.144484	0.18298	0.215418	0.234614	0.199488	0.170622	0.1729	989.168	839.747	1116.92	1516.41	1428.99	1207.46	1426.58	1891.19	2320.63	2570.2	2474.64	2958.61	460.553	512.118	117.076	0	115.45	115.838	0	0	0
2000012	0203S	Lentejas (Secano)	S	0	656.911	246.341	492.683	656.911	739.024	328.455	492.683	492.683	492.683	541.13	492.683	615.854	0.5414	0.629713	0.644947	0.594483	0.609698	0.609097	0.718606	0.756694	0.800406	0.551626	0.464812	0.5955	302.599	152.42	205.653	377.949	415.344	184.416	259.27	291.769	333.059	448.516	444.946	526.429	144.673	0	0	0	0	0	24.8945	99.5551	86.0419
2000012	0204S	Garbanzos (Secano)	S	0	619.696	413.131	495.757	330.504	206.565	413.131	661.009	578.383	413.131	247.878	495.757	289.191	0.636873	0.574725	0.594708	0.649413	0.659244	0.672021	0.628918	0.64824	0.658732	0.667067	0.551682	0.5891	307.554	157.311	194.54	103.07	74.6364	145.067	252.405	174.474	221.775	161.652	317.758	183.093	211.377	161.155	0	0	141.407	153.582	0	0	80.4031
2000012	0205R	Guisante seco	R	0.2	1408.18	1822.35	1739.52	1905.19	1656.68	1242.51	1325.35	2070.85	1944.95	2485.03	2485.03	2153.69	0.183	0.168498	0.164072	0.226191	0.218243	0.187869	0.2031	0.222072	0.268346	0.260067	0.255984	0.2289	224.986	306.38	285.014	351.57	298.631	216.757	333.682	369.646	351.981	447.947	449.054	387.076	354.829	263.037	125.174	0	0	167.83	55.1042	0	0
2000012	0205S	Guisantes secos (Secano)	S	1	666.906	166.727	666.906	916.996	833.633	333.453	291.771	1000.36	708.588	1231.28	833.633	666.906	0.183	0.168498	0.164072	0.226191	0.218243	0.187869	0.2031	0.222072	0.268346	0.260067	0.255984	0.2289	165.606	37.5364	145.043	182.6	213.194	71.6018	67.5192	236.832	213.612	408.89	265.707	218.811	245.306	186.54	95.1786	0	118.359	112.431	50.6398	54.7533	0
2000012	0206S	Veza (Secano)	S	9.8	677.37	169.343	846.713	677.37	846.713	254.014	762.041	592.699	592.699	578.305	508.028	423.356	0.200506	0.212333	0.194385	0.248677	0.290256	0.255703	0.240136	0.216113	0.265426	0.309312	0.347277	0.388	150.947	41.788	163.996	99.7714	121.825	36.5116	158.156	84.4454	85.6153	83.2067	73.2758	60.7331	205.665	183.017	0	0	0	0	0	0	0
2000012	0303R	Patata	R	5	41631.1	35929.8	36835.1	34665.6	36508.2	39958.4	39510.1	38860.7	41348.4	39876.9	39939.4	43355.8	0.255555	0.189698	0.283946	0.251141	0.226568	0.150295	0.259555	0.211247	0.248208	0.348929	0.174342	0.2281	2977.68	2777.91	3014.95	3268.41	3400.93	3794.09	3767.22	3958.09	4907.79	4880.22	4740.85	5369.83	0	0	0	0	0	0	0	0	0
2000012	0402R	Remolacha	R	62	68085.7	75842.3	72388	68947.5	77565.9	77565.9	71533	95595.7	85619	75716.4	88869.9	88878.5	0.0700215	0.0607298	0.0463174	0.0360386	0.0372097	0.0371731	0.0358352	0.0309868	0.034739	0.0341005	0.034587	0.0381	1735.14	1916.53	1864.59	1979.05	2169.61	2112.81	2046.51	3219.24	3424.64	3041.38	3364.59	3683.1	0	6.56986	223.5	0	485.09	1443.1	1288.7	1123.75	982.056
2000012	0409R	Girasol	R	62	1444.8	1699.76	2124.7	2294.68	2124.7	2124.7	2549.65	2549.65	2549.65	2549.65	2549.65	2549.65	0.264769	0.278805	0.234343	0.404844	0.388245	0.225644	0.365759	0.377503	0.503866	0.340705	0.308668	0.364	212.518	282.029	277.944	656.97	409.479	386.434	582.42	650.383	856.823	941.364	991.337	1150.63	273.084	149.528	65.8937	0	50.0776	57.2425	0	0	0
2000012	0409S	Girasol (Secano)	S	9	786.432	248.347	662.258	993.387	910.605	372.52	827.823	993.387	413.911	745.041	662.258	662.258	0.264769	0.278805	0.234343	0.404844	0.388245	0.225644	0.365759	0.377503	0.503866	0.340705	0.308668	0.364	143.581	43.1854	122.732	192.72	200.155	71.8219	184.618	255.578	134.955	252.023	230.926	252.867	194.114	161.928	71.4688	0	63.5273	43.9063	0.650639	0	0
2000012	0421S	Colza (Secano)	S	8.3	0	834.053	667.243	917.459	1668.11	417.027	1251.08	1834.92	1251.08	2502.16	2085.13	1668.11	0	0	0	0	0	0	0	0	0	0.336994	0.327772	0	0	311.449	239.167	318.567	565.796	141.31	423.512	616.301	426.027	1042.8	785.333	639.494	0	0	0	0	0	0	0	0	0
2000012	0610S	Veza para forraje (Secano)	S	1.6	21209.9	1272.59	18664.7	8483.95	16967.9	12725.9	12725.9	10180.7	8483.95	8404.21	7211.36	5302.47	0.12058	0.130403	0.109911	0.112223	0.12557	0.133963	0.0985969	0.103289	0.132008	0.12557	0.152524	0.1272	514.697	29.6083	416.84	183.546	358.588	268.676	229.966	198.254	199.803	207.191	179.378	111.728	0	0	0	0	0	0	0	0	0
2000012	0610S	Veza para forraje (Secano)	S	1.4	21209.9	1272.59	18664.7	8483.95	16967.9	12725.9	12725.9	10180.7	8483.95	8404.21	7211.36	5302.47	0.12058	0.130403	0.109911	0.112223	0.12557	0.133963	0.0985969	0.103289	0.132008	0.12557	0.152524	0.1272	514.697	29.6083	416.84	183.546	358.588	268.676	229.966	198.254	199.803	207.191	179.378	111.728	0	0	0	0	0	0	0	0	0
2000012	0701R	Col	R	0	30000	30000	40000	40000	35000	35000	35000	35000	35000	37300	37300	35000	0.290566	0.355545	0.318393	0.306995	0.300586	0.293176	0.250947	0.245312	0.304898	0.295672	0.271769	0.4429	2616.39	1949.4	2797.33	3096.63	3175.35	3342.15	2641.58	3380.13	2789.09	3924.1	4003.88	2638.99	0	0	0	0	0	0	0	0	0
2000012	0711R	Sandia	R	0	0	0	30000	30000	30000	30000	36000	48000	48000	48000	48000	48000	0.202463	0.218627	0.228832	0.24765	0.371897	0.231054	0.401795	0.241638	0.205413	0.272604	0.176353	0.2735	0	0	3634.03	6522.24	6371.16	4526.15	6913.65	6827.92	9029.94	8623.21	8954.52	5162.42	0	0	0	0	0	0	0	0	0
2000012	0712R	Melón	R	0	0	0	17777.8	13333.3	17777.8	17777.8	17777.8	26666.7	31111.1	26666.7	31111.1	31111.1	0.342507	0.28532	0.328674	0.355663	0.421844	0.301493	0.370564	0.258124	0.275395	0.336392	0.26463	0.4248	0	0	2972.14	2761.25	2944.37	3573.2	3137.36	4163.37	4978.91	4402.73	5508.13	6899.33	59.3455	0	0	0	0	32.8045	0	0	0
2000012	0723R	Ajo	R	0	8181.82	7363.64	7363.64	8181.82	7363.64	8181.82	8181.82	6545.45	6545.45	9818.18	9818.18	7895.45	0.988823	1.13443	1.48269	1.35448	1.26403	1.20787	1.69567	1.86626	1.35089	1.17737	0.943399	1.3569	2010.51	1338.62	1752.65	2067.57	2147.05	2081.7	2404.23	2231.71	1991.94	5102.29	4865.59	1943.24	246.377	0	0	0	0	0	0	0	0
2000012	0724R	Cebolla	R	0	39794.9	32820.5	32113.2	32338.1	36923.1	29629.5	32527.6	32820.5	38608.4	32820.5	32000	32000	0.18634	0.175012	0.19873	0.251551	0.164084	0.139574	0.248044	0.173705	0.202694	0.263377	0.181481	0.2555	3244.68	2459.78	2798.78	3085.93	3593.07	2406.79	2818.8	3116.39	3613.2	4150.02	4087.93	4757.62	0	0	0	0	0	0	0	0	0
2000012	0732R	Guisantes verdes	R	0	0	4090.91	6545.45	5727.27	6545.45	6136.36	3272.73	5072.73	7240.91	7240.91	7240.91	7240.91	0.6796	0.661623	0.695398	0.746235	0.73276	0.612003	0.680769	0.598284	0.60325	0.655633	0.615728	0.5243	0	368.239	565.554	479.38	535.172	501.23	267.06	410.71	594.378	592.034	593.497	644.206	0	0	0	0	0	0	0	0	0
2000012	1201R	Manzano	R	1.3	17821.8	22277.2	31188.1	33861.4	31188.1	19604	3118.81	15972.8	15955	33517.4	33517.4	33517.4	0.3622	0.279909	0.313305	0.388313	0.341306	0.261013	0.296591	0.302519	0.388573	0.418333	0.307462	0.3469	2293.48	2549.88	3026.4	12891.2	7203.69	4496.18	727.663	3561.6	4167.83	10164.4	11734.4	8356.53	0	0	0	0	0	0	0	0	0
2000012	1202R	Peral	R	0.7	21531.1	13812.6	27559.8	20669.9	22257.1	17224.9	3272.73	8250.72	8515.12	10595	10595	10595	0.544509	0.432065	0.4247	0.635142	0.538588	0.477539	0.469161	0.394089	0.459763	0.572388	0.446815	0.5097	2941.68	1797.37	4029.99	4747.94	3692.33	3693.6	591.13	1936.42	2169.94	2650.83	2477.69	2312.45	0	115.232	0	238.224	0	0	0	0	0
2000012	1218S	Almendro (Secano)	S	0	426.236	468.86	1875.44	852.473	596.731	852.473	980.344	1449.2	383.613	511.484	562.632	562.632	1.55314	1.60106	1.02979	0.91113	0.868761	0.617514	0.727415	0.6832	0.903617	1.49862	1.48392	1.8548	285.749	301.362	1157.11	509.504	348.392	497.212	571.231	837.835	224.853	162.267	238.086	327.515	0	0	0	0	0	0	0	0	0
2000012	1302R	Vid	R	0	13500	14400	15300	14400	14670	15120	7200	0	0	0	0	0	0.476906	0.557499	0.53334	0.563065	0.536381	0.568517	0.618308	0.596894	0.612917	0.619928	0.804649	0.7017	1626.84	1448.6	2175.53	403.021	2336.93	2015.8	1132.63	0	0	0	0	0	0	0	0	0	0	56.1504	32.3418	0	6.49468
2000012	1302S	Vid (Secano)	S	0	3636.95	2929.33	3249.73	1922.38	2792.02	3368.73	2288.54	2495.43	2586.97	3249.73	3609.49	3132.56	0.476906	0.557499	0.53334	0.563065	0.536381	0.568517	0.618308	0.596894	0.612917	0.619928	0.804649	0.7017	1250.6	1262.89	1817.48	806.262	780.373	1107.8	905.688	1009.55	1262.81	1569.05	1858.58	1757.06	0	0	0	0	0	0	0	0	0
2000012	1402R	Olivar	R	0	0	0	0	0	0	0	3272.73	1636.36	1636.36	2659.09	2659.09	2659.09	2.71019	3.28732	3.45681	2.54235	2.37026	1.95638	1.88335	1.77595	1.90863	2.52672	2.16219	3.19687	0	0	0	0	0	0	839.151	416.299	422.067	797.937	851.57	677.884	0	0	0	0	0	0	0	0	0
2000012	1402S	Olivar (Secano)	S	0	1431.64	688.379	2803.62	799.33	2001.91	400.858	2386.06	569.076	178.955	2863.27	2487.47	1813.41	2.71019	3.28732	3.45681	2.54235	2.37026	1.95638	1.88335	1.77595	1.90863	2.52672	2.16219	3.19687	158.939	76.0608	365.142	308.188	312.816	60.4799	306.654	156.778	49.874	890.85	661.091	366.494	139.79	210.147	152.583	0	74.0082	79.2558	3.9639	0	6.89745
2000019	0101R	Trigo	R	740	4613.78	4613.78	4531.39	4860.95	4613.78	4531.39	4696.17	4654.98	4613.78	5272.89	5016.66	5272.89	0.162961	0.154143	0.147643	0.215924	0.219547	0.160616	0.174271	0.228528	0.249617	0.214031	0.21084	0.2024	482.448	523.374	780.052	810.608	533.687	592.204	663.108	711.933	933.504	1099.88	1082.64	1226.17	273.003	259.901	0	0	43.3779	51.0002	0	0	0
2000019	0101S	Trigo (Secano)	S	293	2124.43	1823.2	1664.66	2695.17	3012.25	1347.59	2298.82	2259.19	2338.46	2536.63	1664.66	2378.09	0.162961	0.154143	0.147643	0.215924	0.219547	0.160616	0.174271	0.228528	0.249617	0.214031	0.21084	0.2024	225.286	188.811	304.972	288.419	405.484	190.085	267.461	310.643	400.473	466.901	292.321	412.964	166.336	159.51	48.9778	0	40.8705	42.7841	0	0	0
2000019	0102R	Cebada	R	169	4692.23	4735.75	4608.59	4950.82	4949.97	4780.13	4779.28	4736.61	4437.9	4693.94	4437.9	4352.56	0.145456	0.146635	0.133229	0.18851	0.170202	0.124946	0.150448	0.193469	0.224847	0.181234	0.163886	0.174	478.883	437.642	385.562	762.018	482.267	560.671	674.435	708.247	878.589	971.994	907.933	1021.45	286.109	241.572	57.5417	0	58.1515	65.4687	0	0	0
2000019	0102S	Cebada (Secano)	S	100	2082.43	1999.13	1955.91	2740.94	3283.16	1483.63	2200.3	2436.05	2003.84	2750.37	1728.81	2128	0.145456	0.146635	0.133229	0.18851	0.170202	0.124946	0.150448	0.193469	0.224847	0.181234	0.163886	0.174	244.922	222.643	225.134	331.619	500.188	212.997	280.445	366.837	366.666	509.64	313.273	396.813	176.321	154.474	41.8553	0	40.8404	46.9423	0	0	0
2000019	0103R	Avena	R	70.5	2838.03	2956.29	2759.2	3232.21	3389.87	2956.29	2916.87	3035.12	2838.03	2838.03	2680.37	2798.62	0.143959	0.156241	0.135667	0.16243	0.171606	0.12715	0.139837	0.18026	0.218604	0.167795	0.160668	0.1821	354.24	353.783	316.956	359.676	368.483	321.035	316.443	360.854	309.719	308.498	292.079	303.316	0	0	0	0	0	0	0	0	0
2000019	0103S	Avena (Secano)	S	68.7	2241.93	2020.3	2045.87	2813.07	3154.05	895.068	2045.87	2045.87	1960.63	1960.63	1534.4	1619.65	0.143959	0.156241	0.135667	0.16243	0.171606	0.12715	0.139837	0.18026	0.218604	0.167795	0.160668	0.1821	410.806	220.281	224.246	459.545	378.991	101.85	277.163	332.601	414.745	422.358	327.228	335.182	0	149.517	19.8624	0	75.4525	50.389	0	0	0
2000019	0104R	Centeno	R	61.2	2140.47	0	0	2604.24	2541.81	1962.1	2229.66	2497.22	2140.47	2318.84	2229.66	2586.4	0.143037	0.144979	0.135667	0.182657	0.160774	0.12204	0.146644	0.182346	0.220718	0.170001	0.152223	0.1638	337.537	0	0	366.122	349.068	269.191	407.293	339.596	295.115	318.448	306.956	354.145	0	0	0	0	0	0	0	0	0
2000019	0104S	Centeno (Secano)	S	11.1	1538.42	1538.42	1346.12	1865.34	1826.88	1057.66	1442.27	1730.72	1490.35	1730.72	1538.42	2307.63	0.143037	0.144979	0.135667	0.182657	0.160774	0.12204	0.146644	0.182346	0.220718	0.170001	0.152223	0.1638	181.717	197.215	161.941	286.627	322.321	184.439	205.392	300.684	339.234	388.923	365.066	550.336	171.967	153.702	38.824	0	91.4396	62.7433	0	0	0
2000019	0105S	Triticale (Secano)	S	10	1608.94	1966.48	2055.86	2324.02	2860.33	1430.17	2502.79	2502.79	2502.79	1877.09	1877.09	1877.09	0.156166	0.159443	0.147961	0.188715	0.185346	0.154804	0.174972	0.204791	0.22092	0.198886	0.181481	0.1764	236.202	276.786	277.762	304.17	365.691	182.666	319.35	316.857	369.488	223.58	265.18	309.523	0	0	0	0	0	0	0	0	0
2000019	0108R	Maiz	R	16642	8716.96	8626.16	8716.96	7445.74	7808.94	8626.16	9261.77	9443.37	8626.16	9170.97	8989.36	10805.4	0.16895	0.149064	0.160998	0.209968	0.182538	0.144484	0.18298	0.215418	0.234614	0.199488	0.170622	0.1729	973.64	943.054	1077.4	1136.72	1122.59	1213.27	1329.19	1646.91	2012.72	2262.85	2104	2721.29	460.553	512.118	117.076	0	115.45	115.838	0	0	0
2000163	1207S	Cerezo (Secano)	S	0.3	2637.66	2491.12	2442.28	1856.13	2735.35	2442.28	2442.28	2344.58	2344.58	1953.82	1543.52	2442.28	1.41529	1.6142	1.74618	2.10225	1.98927	2.09261	1.78085	1.84491	1.90309	2.48914	2.3679	1.7635	643.563	341.078	350.799	624.164	510.386	492.309	493.05	797.315	688.266	1035.83	992.309	856.274	0	0	0	0	0	0	0	0	0
2000019	0203S	Lentejas (Secano)	S	2.1	502.21	167.403	585.912	837.017	837.017	544.061	669.613	669.613	585.912	920.718	549.083	418.508	0.5414	0.629713	0.644947	0.594483	0.609698	0.609097	0.718606	0.756694	0.800406	0.551626	0.464812	0.5955	231.338	104.355	244.568	485.182	473.943	307.759	352.379	396.548	396.083	763.137	495.882	357.739	144.673	0	0	0	0	0	24.8945	99.5551	86.0419
2000019	0204S	Garbanzos (Secano)	S	16.6	536.824	447.353	751.554	492.089	805.236	581.559	715.766	536.824	536.824	894.707	608.401	581.559	0.636873	0.574725	0.594708	0.649413	0.659244	0.672021	0.628918	0.64824	0.658732	0.667067	0.551682	0.5891	266.425	170.342	294.918	222.076	290.949	204.209	273.314	234.343	288.176	583.476	389.958	368.197	211.377	161.155	0	0	141.407	153.582	0	0	80.4031
2000019	0205R	Guisante seco	R	53.6	1546.06	1374.27	1631.95	1631.95	1631.95	1631.95	1546.06	1546.06	1460.17	1546.06	1288.38	1331.33	0.183	0.168498	0.164072	0.226191	0.218243	0.187869	0.2031	0.222072	0.268346	0.260067	0.255984	0.2289	247.015	231.047	267.39	253.908	248.027	284.695	389.25	232.679	222.797	234.973	196.294	201.741	354.829	263.037	125.174	0	0	167.83	55.1042	0	0
2000019	0205S	Guisantes secos (Secano)	S	8	681.158	510.869	596.013	561.955	936.592	596.013	766.303	766.303	383.151	851.448	468.296	510.869	0.183	0.168498	0.164072	0.226191	0.218243	0.187869	0.2031	0.222072	0.268346	0.260067	0.255984	0.2289	169.145	115.016	129.625	102.531	239.525	127.981	177.331	181.42	115.505	282.754	149.262	167.615	245.306	186.54	95.1786	0	118.359	112.431	50.6398	54.7533	0
2000019	0206R	Veza	R	104.3	1296.02	1296.02	1296.02	1312.22	1458.02	1377.02	1296.02	1296.02	1296.02	1215.02	810.014	850.514	0.200506	0.212333	0.194385	0.248677	0.290256	0.255703	0.240136	0.216113	0.265426	0.309312	0.347277	0.388	226.142	258.917	208.122	204.131	221.559	209.044	196.554	195.019	197.721	184.632	123.392	128.861	0	293.733	0	0	0	0	0	0	0
2000019	0206S	Veza (Secano)	S	225.9	554.452	158.415	554.452	514.849	792.075	554.452	554.452	633.66	356.434	633.66	475.245	475.245	0.200506	0.212333	0.194385	0.248677	0.290256	0.255703	0.240136	0.216113	0.265426	0.309312	0.347277	0.388	123.555	39.0915	107.389	67.5727	101.55	71.015	115.073	80.447	45.8784	81.24	61.0805	60.7503	205.665	183.017	0	0	0	0	0	0	0
2000019	0303R	Patata	R	33	38611.6	37493.6	42068.7	39583	38645	43061.8	38165.2	41995.9	40507.3	39039.3	47134.4	34319.6	0.255555	0.189698	0.283946	0.251141	0.226568	0.150295	0.259555	0.211247	0.248208	0.348929	0.174342	0.2281	2761.71	2898.82	3443.32	3897.99	3599.99	4088.76	3638.98	4277.43	4807.95	4777.71	5594.91	4250.66	0	0	0	0	0	0	0	0	0
2000019	0402R	Remolacha	R	1276	67895.8	76985.4	79733.4	80821.8	82531.1	87353.8	89644.5	86851.4	86581	70707.3	76868.5	90638.1	0.0700215	0.0607298	0.0463174	0.0360386	0.0372097	0.0371731	0.0358352	0.0309868	0.034739	0.0341005	0.034587	0.0381	1730.3	1945.42	2053.8	2370.97	2308.49	2379.41	2564.67	2924.77	3463.12	2840.18	2910.22	3756.02	0	6.56986	223.5	0	485.09	1443.1	1288.7	1123.75	982.056
2000019	0409R	Girasol	R	686	2010.14	1835.35	1922.74	1922.74	1931.48	2263.59	2359.73	2534.53	2184.94	2447.13	1747.95	1835.35	0.264769	0.278805	0.234343	0.404844	0.388245	0.225644	0.365759	0.377503	0.503866	0.340705	0.308668	0.364	295.676	304.525	251.525	532.529	372.241	411.695	539.037	646.527	734.261	903.514	679.627	828.277	273.084	149.528	65.8937	0	50.0776	57.2425	0	0	0
2000019	0409S	Girasol (Secano)	S	81	540.219	347.284	617.393	617.393	694.567	478.48	617.393	771.741	463.045	733.154	655.98	617.393	0.264769	0.278805	0.234343	0.404844	0.388245	0.225644	0.365759	0.377503	0.503866	0.340705	0.308668	0.364	98.6291	60.3896	114.418	104.098	152.669	92.2509	137.689	198.553	150.975	248.002	228.736	235.737	194.114	161.928	71.4688	0	63.5273	43.9063	0.650639	0	0
2000019	0421R	Colza	R	4	0	1632.49	3264.98	3142.55	3264.98	2285.49	2611.99	2203.86	2448.74	2611.99	2693.61	2530.36	0	0	0	0	0	0	0	0	0	0.336994	0.327772	0	0	628.663	1206.9	1125.3	1142.07	798.658	911.855	763.369	859.94	1044.37	1066.82	1003.13	0	0	0	0	0	0	0	0	0
2000019	0421S	Colza (Secano)	S	18	918.597	0	1837.19	2158.7	2204.63	688.948	2572.07	1653.47	1194.18	1929.05	1745.33	1377.9	0	0	0	0	0	0	0	0	0	0.336994	0.327772	0	410.551	0	755.671	860.138	858.091	267.889	999.136	637.286	466.639	803.953	657.353	528.237	0	0	0	0	0	0	0	0	0
2000019	0602R	Maíz forrajero	R	60.9	68366.1	66656.9	68366.1	53285.4	68366.1	72638.9	64093.2	64093.2	64093.2	51274.5	51274.5	55547.4	0.0413174	0.0364542	0.0393728	0.0513487	0.0446405	0.0353342	0.0447485	0.0526814	0.0573758	0.0487857	0.0478587	0.0318	2161.4	2020.46	1989.16	1501.88	1882.3	1997.98	1761.19	1747.44	1771.65	1612.19	1185.59	1627.19	0	0	0	0	0	0	0	0	0
2000019	0606R	Alfalfa	R	305	36172.2	32153.1	36172.2	32153.1	38583.7	36976.1	36976.1	36976.1	32153.1	51846.9	25722.5	25722.5	0.136358	0.138243	0.117224	0.128445	0.167895	0.145286	0.116414	0.139242	0.167351	0.166491	0.148804	0.1513	420.581	437.288	467.721	413.05	697.993	1155.05	822.523	626.49	655.873	1307.51	158.526	718.796	0	0	0	0	16.0774	19.829	0	0	0
2000019	0606S	Alfalfa (Secano)	S	92	11464.8	7643.18	15286.4	11464.8	19107.9	7261.02	13757.7	13757.7	7643.18	16432.8	13757.7	6878.86	0.136358	0.138243	0.117224	0.128445	0.167895	0.145286	0.116414	0.139242	0.167351	0.166491	0.148804	0.1513	168.217	107.52	206.416	149.97	177.607	70.9413	182.141	177.083	105.81	293.045	896.691	127.707	0	0	0	0	107.286	100.508	0	0	0
2000019	0610R	Veza para forraje	R	24.8	20164.9	20164.9	16131.9	20164.9	24197.9	20971.5	20164.9	20164.9	16131.9	24278.5	13873.4	14115.4	0.12058	0.130403	0.109911	0.112223	0.12557	0.133963	0.0985969	0.103289	0.132008	0.12557	0.152524	0.1272	275.462	264.102	202.809	245.581	287.87	249.242	239.42	237.55	192.673	288.83	165.453	206.852	0	0	0	0	0	0	0	0	0
2000019	0610S	Veza para forraje (Secano)	S	32.7	11810	6298.67	11022.7	9448.01	13384.7	6298.67	11810	11810	5905	20313.2	9448.01	9448.01	0.12058	0.130403	0.109911	0.112223	0.12557	0.133963	0.0985969	0.103289	0.132008	0.12557	0.152524	0.1272	233.928	119.617	200.934	166.842	230.884	108.544	213.415	229.981	139.067	500.787	235.013	162.497	0	0	0	0	0	0	0	0	0
2000019	0701R	Col	R	1	35892.3	35892.3	36789.6	36341	39032.9	40019.9	39032.9	37686.9	36341	35892.3	34097.7	34097.7	0.290566	0.355545	0.318393	0.306995	0.300586	0.293176	0.250947	0.245312	0.304898	0.295672	0.271769	0.4429	3130.27	2332.28	2572.82	2964.65	3541.24	3821.51	3104.38	3639.63	2895.95	3776	3660.14	2709.2	0	0	0	0	0	0	0	0	0
2000019	0705R	Lechuga	R	0.3	28682	26202	25417.8	23067.1	22767.9	25054.8	25913.8	25913.8	25327.3	23036.6	20920.6	20920.6	0.370262	0.564456	0.417599	0.432874	0.491449	0.377642	0.468861	0.29795	0.442041	0.418534	0.335916	0.2512	1857.87	1373.46	2417.22	1505.43	2116.98	2557.25	2652.06	2766.72	1621.03	1468.61	1337	1329.78	0	0	0	0	0	0	0	0	0
2000019	0711R	Sandia	R	0.6	40000	40000	40000	42000	44500	40000	41000	35000	40000	38000	36000	36000	0.202463	0.218627	0.228832	0.24765	0.371897	0.231054	0.401795	0.241638	0.205413	0.272604	0.176353	0.2735	5105.26	4806.29	4845.38	8870.33	9180.63	6034.86	7873.88	4978.69	7524.95	6826.71	6715.89	3871.81	0	0	0	0	0	0	0	0	0
2000019	0718R	Pimiento	R	0.7	14850	21176.5	17647.1	12352.9	19367.6	17647.1	19658.8	19676.5	18770.3	14382.4	11311.8	14117.6	0.994582	0.749295	0.732494	0.875194	0.850106	0.701278	0.838824	0.656881	0.615937	0.693745	0.654739	0.9148	3137.67	3575.91	3041.12	2326.94	5654.67	5182.73	3610.25	3585.28	3467.55	2646.46	2086.59	2590.09	0	0	0	0	0	0	0	0	0
2000019	0722R	Coliflor	R	1.6	29481.6	29481.6	31840.2	30324	30324	30745.1	32400.3	30492.4	30324	28892	29481.6	29481.6	0.397787	0.492022	0.494971	0.451663	0.376109	0.403593	0.547638	0.323077	0.416566	0.514016	0.386187	0.3787	3010.62	2540.42	3159.66	3425.16	3134.84	3892.29	3567.88	3037.87	3181.35	3612.66	3787.36	3243.29	0	0	0	0	0	0	0	0	0
2000019	0723R	Ajo	R	0	8967.39	9375	9211.96	7438.86	10190.2	9945.65	23885.9	9375	9782.61	9375	8152.17	9782.61	0.988823	1.13443	1.48269	1.35448	1.26403	1.20787	1.69567	1.86626	1.35089	1.17737	0.943399	1.3569	2203.55	1704.26	2192.58	2437.52	2971.21	2530.47	7018.88	3196.46	2977.09	4871.98	4039.97	3122.03	246.377	0	0	0	0	0	0	0	0
2000019	0724R	Cebolla	R	0	20651.3	22296.1	22838.5	17180.4	20158.4	20295.8	20731.1	20845.6	20818.1	20272.9	20158.4	19764.4	0.18634	0.175012	0.19873	0.251551	0.164084	0.139574	0.248044	0.173705	0.202694	0.263377	0.181481	0.2555	1683.81	1671.01	1990.46	943.275	1961.66	1648.62	1796.53	1979.34	1120.94	2563.42	2575.19	2938.48	0	0	0	0	0	0	0	0	0
2000019	0732R	Guisantes verdes	R	0	7500	9000	9000	9750	0	0	0	0	0	0	0	0	0.6796	0.661623	0.695398	0.746235	0.73276	0.612003	0.680769	0.598284	0.60325	0.655633	0.615728	0.5243	973.45	1119.97	1075.05	1128.21	0	0	0	0	0	0	0	0	0	0	0	0	0	0	0	0	0
2000019	1201R	Manzano	R	11.1	19758.2	19463.1	21048.6	18515.4	6611.69	18222.7	36353.9	33479.2	18484.9	29444.7	30669.2	34644	0.3622	0.279909	0.313305	0.388313	0.341306	0.261013	0.296591	0.302519	0.388573	0.418333	0.307462	0.3469	2542.68	2227.77	2042.5	6839	1527.14	4179.39	8481.89	7465.18	4828.72	8929.31	10737.3	8637.41	0	0	0	0	0	0	0	0	0
2000017	1207S	Cerezo (Secano)	S	1.4	6712.71	6849.45	7344.2	6476.52	3938.12	7310.64	14792.8	15608.3	6491.44	7932.18	7932.18	8328.73	0.3622	0.279909	0.313305	0.388313	0.341306	0.261013	0.296591	0.302519	0.388573	0.418333	0.307462	0.3469	717.859	775.87	689.656	1613.86	486.974	2080.49	2420.48	2477.3	2220.4	377.22	3451.12	1655.24	0	0	0	0	0	0	0	0	0
2000019	1202R	Peral	R	4	28304.4	26341.5	27708.2	27033.5	25018.4	30536.1	29444.5	31205.7	26812	27776.6	26962.6	26312.8	0.544509	0.432065	0.4247	0.635142	0.538588	0.477539	0.469161	0.394089	0.459763	0.572388	0.446815	0.5097	3867.07	3427.69	4051.68	11840.4	4150.4	6547.97	5318.35	7323.9	6832.61	6949.58	6305.31	5743	0	115.232	0	238.224	0	0	0	0	0
2000038	1207S	Cerezo (Secano)	S	0.5	7625	6825	7875	7650	8625	8937.5	12250	15000	12500	12875	12787.5	12987.5	0.544509	0.432065	0.4247	0.635142	0.538588	0.477539	0.469161	0.394089	0.459763	0.572388	0.446815	0.5097	1532.09	382.89	524.811	2823.94	605.3	2872.17	2353.44	2006.36	4407.14	3188.74	2580.93	1930.64	0	0	0	0	0	0	0	0	0
2000019	1218S	Almendro (Secano)	S	3	312.5	437.5	1250	1250	1250	1250	1250	1250	875	937.5	937.5	937.5	1.55314	1.60106	1.02979	0.91113	0.868761	0.617514	0.727415	0.6832	0.903617	1.49862	1.48392	1.8548	246.714	331.156	908.216	879.806	859.426	858.58	857.735	851.037	603.979	297.419	396.717	642.669	0	0	0	0	0	0	0	0	0
2000019	1302R	Vid	R	0	6184.7	6184.7	6397.84	5138.06	5138.06	5737.5	5375.93	6065.76	5518.66	5147.57	3996.27	4510.07	0.476906	0.557499	0.53334	0.563065	0.536381	0.568517	0.618308	0.596894	0.612917	0.619928	0.804649	0.7017	745.296	622.162	909.718	143.802	818.491	764.923	845.684	1234.08	1230.91	1445.25	921.619	967.173	0	0	0	0	0	56.1504	32.3418	0	6.49468
2000019	1302S	Vid (Secano)	S	190	2984.36	4076.37	3512.2	2549.37	2554.42	2775.44	2383.85	2926.83	2298.07	2230.45	1983.18	2148.7	0.476906	0.557499	0.53334	0.563065	0.536381	0.568517	0.618308	0.596894	0.612917	0.619928	0.804649	0.7017	1026.2	1757.4	1964.27	1041.1	713.962	912.694	943.406	1184.08	1121.78	1076.92	1021.17	1205.21	0	0	0	0	0	0	0	0	0
2000033	0101R	Trigo	R	102	6151.71	6151.71	6041.86	6481.27	6151.71	6041.86	6261.56	6206.64	6151.71	7030.53	6688.89	7030.53	0.162961	0.154143	0.147643	0.215924	0.219547	0.160616	0.174271	0.228528	0.249617	0.214031	0.21084	0.2024	643.264	697.832	1386.76	1441.08	711.583	789.605	884.144	949.243	1244.67	1466.51	1443.53	1634.9	273.003	259.901	0	0	43.3779	51.0002	0	0	0
2000033	0101S	Trigo (Secano)	S	366	2832.57	2430.94	2219.55	3593.56	4016.33	1796.78	3065.1	3012.25	3117.94	3382.17	2219.55	3170.79	0.162961	0.154143	0.147643	0.215924	0.219547	0.160616	0.174271	0.228528	0.249617	0.214031	0.21084	0.2024	300.381	251.748	406.629	512.746	540.645	253.446	356.615	414.19	533.964	622.535	389.761	550.619	166.336	159.51	48.9778	0	40.8705	42.7841	0	0	0
2000033	0102R	Cebada	R	51	6256.31	6314.34	6144.79	6601.1	6599.96	6373.51	6372.37	6315.48	5917.2	6258.58	5917.2	5803.41	0.145456	0.146635	0.133229	0.18851	0.170202	0.124946	0.150448	0.193469	0.224847	0.181234	0.163886	0.174	638.511	583.523	514.083	1354.7	643.023	747.561	899.246	944.33	1171.45	1295.99	1210.58	1361.93	286.109	241.572	57.5417	0	58.1515	65.4687	0	0	0
2000033	0102S	Cebada (Secano)	S	320	2776.57	2665.51	2607.88	3654.59	4377.55	1978.17	2933.73	3248.06	2671.79	3667.17	2305.08	2837.34	0.145456	0.146635	0.133229	0.18851	0.170202	0.124946	0.150448	0.193469	0.224847	0.181234	0.163886	0.174	326.562	296.857	300.178	589.544	666.917	283.997	373.927	489.116	488.888	679.52	417.697	529.083	176.321	154.474	41.8553	0	40.8404	46.9423	0	0	0
2000033	0103R	Avena	R	18	3784.05	3941.71	3678.93	4309.61	4519.83	3941.71	3889.16	4046.83	3784.05	3784.05	3573.82	3731.49	0.143959	0.156241	0.135667	0.16243	0.171606	0.12715	0.139837	0.18026	0.218604	0.167795	0.160668	0.1821	629.76	628.948	563.477	639.424	655.082	570.73	562.566	481.139	550.611	548.44	519.251	539.229	0	0	0	0	0	0	0	0	0
2000033	0103S	Avena (Secano)	S	10.4	2989.24	2693.73	2727.83	3750.76	4205.4	1193.42	2727.83	2727.83	2614.17	2614.17	2045.87	2159.53	0.143959	0.156241	0.135667	0.16243	0.171606	0.12715	0.139837	0.18026	0.218604	0.167795	0.160668	0.1821	730.322	293.708	298.994	816.969	505.322	135.8	369.551	443.469	552.994	563.144	436.304	446.909	0	149.517	19.8624	0	75.4525	50.389	0	0	0
2000033	0104R	Centeno	R	2	2853.96	0	0	3472.32	3389.08	2616.13	2972.88	3329.62	2853.96	3091.79	2972.88	3448.54	0.143037	0.144979	0.135667	0.182657	0.160774	0.12204	0.146644	0.182346	0.220718	0.170001	0.152223	0.1638	600.066	0	0	650.884	620.565	478.561	543.057	603.727	524.65	566.129	545.7	629.59	0	0	0	0	0	0	0	0	0
2000033	0104S	Centeno (Secano)	S	3	2051.23	2051.23	1794.82	2487.11	2435.83	1410.22	1923.03	2307.63	1987.13	2307.63	2051.23	3076.84	0.143037	0.144979	0.135667	0.182657	0.160774	0.12204	0.146644	0.182346	0.220718	0.170001	0.152223	0.1638	242.29	262.953	215.921	509.56	429.761	245.919	273.856	400.912	452.312	518.564	486.754	733.781	171.967	153.702	38.824	0	91.4396	62.7433	0	0	0
2000033	0105S	Triticale (Secano)	S	0.5	2145.25	2621.97	2741.15	3098.69	3813.78	1906.89	3337.05	3337.05	3337.05	2502.79	2502.79	2502.79	0.156166	0.159443	0.147961	0.188715	0.185346	0.154804	0.174972	0.204791	0.22092	0.198886	0.181481	0.1764	419.914	492.064	493.8	540.747	650.118	324.739	567.734	563.301	492.651	298.107	353.574	412.697	0	0	0	0	0	0	0	0	0
2000033	0108R	Maiz	R	6	11622.6	11501.5	11622.6	9927.65	10411.9	11501.5	12349	12591.2	11501.5	12228	11985.8	14407.2	0.16895	0.149064	0.160998	0.209968	0.182538	0.144484	0.18298	0.215418	0.234614	0.199488	0.170622	0.1729	1298.19	1257.4	1436.53	2020.84	1496.78	1617.69	1772.25	2195.88	2683.62	3017.14	2805.33	3628.39	460.553	512.118	117.076	0	115.45	115.838	0	0	0
2000033	0203S	Lentejas (Secano)	S	0	669.613	223.204	781.215	1116.02	1116.02	725.414	892.818	892.818	781.215	1227.62	732.11	558.011	0.5414	0.629713	0.644947	0.594483	0.609698	0.609097	0.718606	0.756694	0.800406	0.551626	0.464812	0.5955	308.451	185.52	326.091	862.545	842.565	547.128	469.838	528.731	528.11	1017.52	661.175	476.985	144.673	0	0	0	0	0	24.8945	99.5551	86.0419
2000033	0206R	Veza	R	1.8	1728.03	1728.03	1728.03	1749.63	1944.03	1836.03	1728.03	1728.03	1728.03	1620.03	1080.02	1134.02	0.200506	0.212333	0.194385	0.248677	0.290256	0.255703	0.240136	0.216113	0.265426	0.309312	0.347277	0.388	402.031	345.223	369.994	362.9	393.882	371.633	349.429	346.7	351.503	328.235	219.364	229.087	0	293.733	0	0	0	0	0	0	0
2000033	0206S	Veza (Secano)	S	11.2	739.27	211.22	739.27	686.465	1056.1	739.27	739.27	844.88	475.245	844.88	633.66	633.66	0.200506	0.212333	0.194385	0.248677	0.290256	0.255703	0.240136	0.216113	0.265426	0.309312	0.347277	0.388	164.741	52.1219	143.186	120.129	180.533	126.249	153.43	143.017	81.5615	144.427	108.588	108.001	205.665	183.017	0	0	0	0	0	0	0
2000033	0303R	Patata	R	0	51482.1	49991.5	56091.6	52777.4	51526.7	57415.7	50886.9	55994.6	54009.7	52052.4	62845.9	45759.5	0.255555	0.189698	0.283946	0.251141	0.226568	0.150295	0.259555	0.211247	0.248208	0.348929	0.174342	0.2281	3682.28	3865.09	4591.1	6929.76	4799.99	5451.68	4851.98	5703.24	6410.6	6370.28	7459.88	5667.55	0	0	0	0	0	0	0	0	0
2000033	0402R	Remolacha	R	0	90527.7	102647	106311	107762	110042	116472	119526	115802	115441	94276.4	102491	120851	0.0700215	0.0607298	0.0463174	0.0360386	0.0372097	0.0371731	0.0358352	0.0309868	0.034739	0.0341005	0.034587	0.0381	2307.07	2593.89	2738.39	4215.06	3077.99	3172.55	3419.56	3899.7	4617.49	3786.9	3880.3	5008.02	0	6.56986	223.5	0	485.09	1443.1	1288.7	1123.75	982.056
2000033	0409R	Girasol	R	13	2680.19	2447.13	2563.66	2563.66	2575.31	3018.13	3146.31	3379.37	2913.25	3262.84	2330.6	2447.13	0.264769	0.278805	0.234343	0.404844	0.388245	0.225644	0.365759	0.377503	0.503866	0.340705	0.308668	0.364	394.234	406.033	335.366	946.719	496.321	548.927	718.716	862.036	979.014	1204.69	906.169	1104.37	273.084	149.528	65.8937	0	50.0776	57.2425	0	0	0
2000033	0409S	Girasol (Secano)	S	32	720.292	463.045	823.191	823.191	926.089	637.973	823.191	1028.99	617.393	977.539	874.64	823.191	0.264769	0.278805	0.234343	0.404844	0.388245	0.225644	0.365759	0.377503	0.503866	0.340705	0.308668	0.364	131.505	80.5195	152.557	185.062	203.559	123.001	183.585	264.737	201.3	330.67	304.982	314.315	194.114	161.928	71.4688	0	63.5273	43.9063	0.650639	0	0
2000033	0602R	Maíz forrajero	R	4.8	91154.8	88875.9	91154.8	71047.2	91154.8	96851.9	85457.6	85457.6	85457.6	68366.1	68366.1	74063.2	0.0413174	0.0364542	0.0393728	0.0513487	0.0446405	0.0353342	0.0447485	0.0526814	0.0573758	0.0487857	0.0478587	0.0318	3842.49	3591.94	3536.29	2670.01	3346.32	3551.96	3131	3106.55	3149.59	2149.59	1580.78	2169.59	0	0	0	0	0	0	0	0	0
2000033	0606R	Alfalfa	R	29	48229.7	42870.8	48229.7	42870.8	51445	49301.4	49301.4	49301.4	42870.8	69129.2	34296.6	34296.6	0.136358	0.138243	0.117224	0.128445	0.167895	0.145286	0.116414	0.139242	0.167351	0.166491	0.148804	0.1513	560.775	583.05	623.628	734.312	930.657	1540.06	1096.7	835.32	874.497	1743.35	211.367	958.395	0	0	0	0	16.0774	19.829	0	0	0
2000033	0606S	Alfalfa (Secano)	S	35	15286.4	10190.9	20381.8	15286.4	25477.3	9681.36	18343.6	18343.6	10190.9	21910.4	18343.6	9171.81	0.136358	0.138243	0.117224	0.128445	0.167895	0.145286	0.116414	0.139242	0.167351	0.166491	0.148804	0.1513	299.053	191.147	366.963	266.613	236.809	94.5884	242.855	236.111	141.081	390.727	1195.59	170.276	0	0	0	0	107.286	100.508	0	0	0
2000033	0610R	Veza para forraje	R	4.6	26886.5	26886.5	21509.2	26886.5	32263.8	27962	26886.5	26886.5	21509.2	32371.4	18497.9	18820.6	0.12058	0.130403	0.109911	0.112223	0.12557	0.133963	0.0985969	0.103289	0.132008	0.12557	0.152524	0.1272	489.71	469.515	360.549	436.588	511.77	443.097	425.635	422.312	342.53	513.475	294.139	275.803	0	0	0	0	0	0	0	0	0
2000033	0610S	Veza para forraje (Secano)	S	74	15746.7	8398.23	14696.9	12597.3	17846.2	8398.23	15746.7	15746.7	7873.34	27084.3	12597.3	12597.3	0.12058	0.130403	0.109911	0.112223	0.12557	0.133963	0.0985969	0.103289	0.132008	0.12557	0.152524	0.1272	415.872	212.652	357.217	296.608	410.461	192.968	284.553	306.641	185.423	667.716	313.351	288.883	0	0	0	0	0	0	0	0	0
2000033	1201R	Manzano	R	0	26344.3	25950.8	28064.8	24687.2	8815.59	24296.9	48471.9	44639	24646.6	39259.5	40892.2	46192	0.3622	0.279909	0.313305	0.388313	0.341306	0.261013	0.296591	0.302519	0.388573	0.418333	0.307462	0.3469	3390.24	2970.36	2723.33	12158.2	2036.19	5572.52	11309.2	9953.58	6438.3	11905.8	14316.3	11516.5	0	0	0	0	0	0	0	0	0
2000033	1202R	Peral	R	0	37739.1	35122	36944.2	36044.7	33357.8	40714.8	39259.3	41607.7	35749.3	37035.5	35950.1	35083.8	0.544509	0.432065	0.4247	0.635142	0.538588	0.477539	0.469161	0.394089	0.459763	0.572388	0.446815	0.5097	5156.1	4570.26	5402.24	21049.6	5533.87	8730.63	7091.14	9765.2	9110.14	9266.11	8407.07	7657.34	0	115.232	0	238.224	0	0	0	0	0
2000033	1218S	Almendro (Secano)	S	0	416.667	583.333	1666.67	1666.67	1666.67	1666.67	1666.67	1666.67	1166.67	1250	1250	1250	1.55314	1.60106	1.02979	0.91113	0.868761	0.617514	0.727415	0.6832	0.903617	1.49862	1.48392	1.8548	438.603	588.723	1614.61	1564.1	1527.87	1526.36	1524.86	1512.95	1073.74	396.559	528.956	1142.52	0	0	0	0	0	0	0	0	0
2000033	1302R	Vid	R	0	8246.27	8246.27	8530.45	6850.75	6850.75	7650	7167.91	8087.69	7358.21	6863.43	5328.36	6013.43	0.476906	0.557499	0.53334	0.563065	0.536381	0.568517	0.618308	0.596894	0.612917	0.619928	0.804649	0.7017	993.728	829.55	1212.96	191.736	1091.32	1019.9	1127.58	1645.44	1641.21	1926.99	1228.83	1289.56	0	0	0	0	0	56.1504	32.3418	0	6.49468
2000033	1302S	Vid (Secano)	S	0	3979.14	5435.16	4682.93	3399.16	3405.89	3700.59	3178.47	3902.44	3064.09	2973.93	2644.24	2864.93	0.476906	0.557499	0.53334	0.563065	0.536381	0.568517	0.618308	0.596894	0.612917	0.619928	0.804649	0.7017	1368.26	2343.2	2619.03	1850.84	951.95	1216.93	1257.88	1578.77	1495.71	1435.89	1361.55	1606.94	0	0	0	0	0	0	0	0	0
2000034	0101R	Trigo	R	637	6151.71	6151.71	6041.86	6481.27	6151.71	6041.86	6261.56	6206.64	6151.71	7030.53	6688.89	7030.53	0.162961	0.154143	0.147643	0.215924	0.219547	0.160616	0.174271	0.228528	0.249617	0.214031	0.21084	0.2024	643.264	697.832	1386.76	1441.08	711.583	789.605	884.144	949.243	1244.67	1466.51	1443.53	1634.9	273.003	259.901	0	0	43.3779	51.0002	0	0	0
2000034	0101S	Trigo (Secano)	S	613	2832.57	2430.94	2219.55	3593.56	4016.33	1796.78	3065.1	3012.25	3117.94	3382.17	2219.55	3170.79	0.162961	0.154143	0.147643	0.215924	0.219547	0.160616	0.174271	0.228528	0.249617	0.214031	0.21084	0.2024	300.381	251.748	406.629	512.746	540.645	253.446	356.615	414.19	533.964	622.535	389.761	550.619	166.336	159.51	48.9778	0	40.8705	42.7841	0	0	0
2000034	0102R	Cebada	R	176	6256.31	6314.34	6144.79	6601.1	6599.96	6373.51	6372.37	6315.48	5917.2	6258.58	5917.2	5803.41	0.145456	0.146635	0.133229	0.18851	0.170202	0.124946	0.150448	0.193469	0.224847	0.181234	0.163886	0.174	638.511	583.523	514.083	1354.7	643.023	747.561	899.246	944.33	1171.45	1295.99	1210.58	1361.93	286.109	241.572	57.5417	0	58.1515	65.4687	0	0	0
2000034	0102S	Cebada (Secano)	S	293	2776.57	2665.51	2607.88	3654.59	4377.55	1978.17	2933.73	3248.06	2671.79	3667.17	2305.08	2837.34	0.145456	0.146635	0.133229	0.18851	0.170202	0.124946	0.150448	0.193469	0.224847	0.181234	0.163886	0.174	326.562	296.857	300.178	589.544	666.917	283.997	373.927	489.116	488.888	679.52	417.697	529.083	176.321	154.474	41.8553	0	40.8404	46.9423	0	0	0
2000034	0103R	Avena	R	105	3784.05	3941.71	3678.93	4309.61	4519.83	3941.71	3889.16	4046.83	3784.05	3784.05	3573.82	3731.49	0.143959	0.156241	0.135667	0.16243	0.171606	0.12715	0.139837	0.18026	0.218604	0.167795	0.160668	0.1821	629.76	628.948	563.477	639.424	655.082	570.73	562.566	481.139	550.611	548.44	519.251	539.229	0	0	0	0	0	0	0	0	0
2000034	0103S	Avena (Secano)	S	20.3	2989.24	2693.73	2727.83	3750.76	4205.4	1193.42	2727.83	2727.83	2614.17	2614.17	2045.87	2159.53	0.143959	0.156241	0.135667	0.16243	0.171606	0.12715	0.139837	0.18026	0.218604	0.167795	0.160668	0.1821	730.322	293.708	298.994	816.969	505.322	135.8	369.551	443.469	552.994	563.144	436.304	446.909	0	149.517	19.8624	0	75.4525	50.389	0	0	0
2000034	0104R	Centeno	R	6.5	2853.96	0	0	3472.32	3389.08	2616.13	2972.88	3329.62	2853.96	3091.79	2972.88	3448.54	0.143037	0.144979	0.135667	0.182657	0.160774	0.12204	0.146644	0.182346	0.220718	0.170001	0.152223	0.1638	600.066	0	0	650.884	620.565	478.561	543.057	603.727	524.65	566.129	545.7	629.59	0	0	0	0	0	0	0	0	0
2000034	0104S	Centeno (Secano)	S	0.5	2051.23	2051.23	1794.82	2487.11	2435.83	1410.22	1923.03	2307.63	1987.13	2307.63	2051.23	3076.84	0.143037	0.144979	0.135667	0.182657	0.160774	0.12204	0.146644	0.182346	0.220718	0.170001	0.152223	0.1638	242.29	262.953	215.921	509.56	429.761	245.919	273.856	400.912	452.312	518.564	486.754	733.781	171.967	153.702	38.824	0	91.4396	62.7433	0	0	0
2000034	0105S	Triticale (Secano)	S	3.2	2145.25	2621.97	2741.15	3098.69	3813.78	1906.89	3337.05	3337.05	3337.05	2502.79	2502.79	2502.79	0.156166	0.159443	0.147961	0.188715	0.185346	0.154804	0.174972	0.204791	0.22092	0.198886	0.181481	0.1764	419.914	492.064	493.8	540.747	650.118	324.739	567.734	563.301	492.651	298.107	353.574	412.697	0	0	0	0	0	0	0	0	0
2000034	0108R	Maiz	R	3346	11622.6	11501.5	11622.6	9927.65	10411.9	11501.5	12349	12591.2	11501.5	12228	11985.8	14407.2	0.16895	0.149064	0.160998	0.209968	0.182538	0.144484	0.18298	0.215418	0.234614	0.199488	0.170622	0.1729	1298.19	1257.4	1436.53	2020.84	1496.78	1617.69	1772.25	2195.88	2683.62	3017.14	2805.33	3628.39	460.553	512.118	117.076	0	115.45	115.838	0	0	0
2000045	1207S	Cerezo (Secano)	S	2	3516.88	3321.49	3256.37	2474.84	3647.13	3256.37	3256.37	3126.11	3126.11	2605.09	2058.02	3256.37	1.41529	1.6142	1.74618	2.10225	1.98927	2.09261	1.78085	1.84491	1.90309	2.48914	2.3679	1.7635	643.563	341.078	350.799	624.164	510.386	492.309	493.05	797.315	688.266	1035.83	992.309	856.274	0	0	0	0	0	0	0	0	0
2000034	0203S	Lentejas (Secano)	S	2.5	669.613	223.204	781.215	1116.02	1116.02	725.414	892.818	892.818	781.215	1227.62	732.11	558.011	0.5414	0.629713	0.644947	0.594483	0.609698	0.609097	0.718606	0.756694	0.800406	0.551626	0.464812	0.5955	308.451	185.52	326.091	862.545	842.565	547.128	469.838	528.731	528.11	1017.52	661.175	476.985	144.673	0	0	0	0	0	24.8945	99.5551	86.0419
2000034	0204S	Garbanzos (Secano)	S	17.7	715.766	596.471	1002.07	656.118	1073.65	775.413	954.354	715.766	715.766	1192.94	811.201	775.413	0.636873	0.574725	0.594708	0.649413	0.659244	0.672021	0.628918	0.64824	0.658732	0.667067	0.551682	0.5891	355.234	227.123	393.224	394.802	387.932	272.278	364.419	416.61	384.234	777.968	519.944	490.929	211.377	161.155	0	0	141.407	153.582	0	0	80.4031
2000034	0205S	Guisantes secos (Secano)	S	5	908.211	681.158	794.684	749.274	1248.79	794.684	1021.74	1021.74	510.869	1135.26	624.395	681.158	0.183	0.168498	0.164072	0.226191	0.218243	0.187869	0.2031	0.222072	0.268346	0.260067	0.255984	0.2289	225.526	153.354	172.833	182.277	319.367	170.641	236.442	241.894	154.007	377.006	199.016	223.487	245.306	186.54	95.1786	0	118.359	112.431	50.6398	54.7533	0
2000034	0206R	Veza	R	26.3	1728.03	1728.03	1728.03	1749.63	1944.03	1836.03	1728.03	1728.03	1728.03	1620.03	1080.02	1134.02	0.200506	0.212333	0.194385	0.248677	0.290256	0.255703	0.240136	0.216113	0.265426	0.309312	0.347277	0.388	402.031	345.223	369.994	362.9	393.882	371.633	349.429	346.7	351.503	328.235	219.364	229.087	0	293.733	0	0	0	0	0	0	0
2000034	0206S	Veza (Secano)	S	208.4	739.27	211.22	739.27	686.465	1056.1	739.27	739.27	844.88	475.245	844.88	633.66	633.66	0.200506	0.212333	0.194385	0.248677	0.290256	0.255703	0.240136	0.216113	0.265426	0.309312	0.347277	0.388	164.741	52.1219	143.186	120.129	180.533	126.249	153.43	143.017	81.5615	144.427	108.588	108.001	205.665	183.017	0	0	0	0	0	0	0
2000034	0303R	Patata	R	12	51482.1	49991.5	56091.6	52777.4	51526.7	57415.7	50886.9	55994.6	54009.7	52052.4	62845.9	45759.5	0.255555	0.189698	0.283946	0.251141	0.226568	0.150295	0.259555	0.211247	0.248208	0.348929	0.174342	0.2281	3682.28	3865.09	4591.1	6929.76	4799.99	5451.68	4851.98	5703.24	6410.6	6370.28	7459.88	5667.55	0	0	0	0	0	0	0	0	0
2000034	0402R	Remolacha	R	401	90527.7	102647	106311	107762	110042	116472	119526	115802	115441	94276.4	102491	120851	0.0700215	0.0607298	0.0463174	0.0360386	0.0372097	0.0371731	0.0358352	0.0309868	0.034739	0.0341005	0.034587	0.0381	2307.07	2593.89	2738.39	4215.06	3077.99	3172.55	3419.56	3899.7	4617.49	3786.9	3880.3	5008.02	0	6.56986	223.5	0	485.09	1443.1	1288.7	1123.75	982.056
2000034	0409R	Girasol	R	332	2680.19	2447.13	2563.66	2563.66	2575.31	3018.13	3146.31	3379.37	2913.25	3262.84	2330.6	2447.13	0.264769	0.278805	0.234343	0.404844	0.388245	0.225644	0.365759	0.377503	0.503866	0.340705	0.308668	0.364	394.234	406.033	335.366	946.719	496.321	548.927	718.716	862.036	979.014	1204.69	906.169	1104.37	273.084	149.528	65.8937	0	50.0776	57.2425	0	0	0
2000034	0409S	Girasol (Secano)	S	125	720.292	463.045	823.191	823.191	926.089	637.973	823.191	1028.99	617.393	977.539	874.64	823.191	0.264769	0.278805	0.234343	0.404844	0.388245	0.225644	0.365759	0.377503	0.503866	0.340705	0.308668	0.364	131.505	80.5195	152.557	185.062	203.559	123.001	183.585	264.737	201.3	330.67	304.982	314.315	194.114	161.928	71.4688	0	63.5273	43.9063	0.650639	0	0
2000034	0421R	Colza	R	15.4	0	2176.66	4353.31	4190.06	4353.31	3047.32	3482.65	2938.49	3264.98	3482.65	3591.48	3373.82	0	0	0	0	0	0	0	0.333804	0.444357	0.445012	0.496283	0.4763	0	1117.62	2145.6	2000.54	2030.34	1419.84	1621.07	1357.1	1528.78	1392.49	1422.43	1337.5	0	0	0	0	0	0	0	0	0
2000034	0421S	Colza (Secano)	S	14.6	1224.8	0	2449.59	2878.27	2939.51	918.597	3429.43	2204.63	1592.23	2572.07	2327.11	1837.19	0	0	0	0	0	0	0	0.333804	0.444357	0.445012	0.496283	0.4763	729.869	0	1343.42	1529.13	1525.5	476.248	1776.24	1132.95	829.581	1071.94	876.471	704.316	0	0	0	0	0	0	0	0	0
2000034	0602R	Maíz forrajero	R	49.2	91154.8	88875.9	91154.8	71047.2	91154.8	96851.9	85457.6	85457.6	85457.6	68366.1	68366.1	74063.2	0.0413174	0.0364542	0.0393728	0.0513487	0.0446405	0.0353342	0.0447485	0.0526814	0.0573758	0.0487857	0.0478587	0.0318	3842.49	3591.94	3536.29	2670.01	3346.32	3551.96	3131	3106.55	3149.59	2149.59	1580.78	2169.59	0	0	0	0	0	0	0	0	0
2000034	0606R	Alfalfa	R	600	48229.7	42870.8	48229.7	42870.8	51445	49301.4	49301.4	49301.4	42870.8	69129.2	34296.6	34296.6	0.136358	0.138243	0.117224	0.128445	0.167895	0.145286	0.116414	0.139242	0.167351	0.166491	0.148804	0.1513	560.775	583.05	623.628	734.312	930.657	1540.06	1096.7	835.32	874.497	1743.35	211.367	958.395	0	0	0	0	16.0774	19.829	0	0	0
2000034	0606S	Alfalfa (Secano)	S	89	15286.4	10190.9	20381.8	15286.4	25477.3	9681.36	18343.6	18343.6	10190.9	21910.4	18343.6	9171.81	0.136358	0.138243	0.117224	0.128445	0.167895	0.145286	0.116414	0.139242	0.167351	0.166491	0.148804	0.1513	299.053	191.147	366.963	266.613	236.809	94.5884	242.855	236.111	141.081	390.727	1195.59	170.276	0	0	0	0	107.286	100.508	0	0	0
2000034	0610R	Veza para forraje	R	32.2	26886.5	26886.5	21509.2	26886.5	32263.8	27962	26886.5	26886.5	21509.2	32371.4	18497.9	18820.6	0.12058	0.130403	0.109911	0.112223	0.12557	0.133963	0.0985969	0.103289	0.132008	0.12557	0.152524	0.1272	489.71	469.515	360.549	436.588	511.77	443.097	425.635	422.312	342.53	513.475	294.139	275.803	0	0	0	0	0	0	0	0	0
2000034	0610S	Veza para forraje (Secano)	S	168.5	15746.7	8398.23	14696.9	12597.3	17846.2	8398.23	15746.7	15746.7	7873.34	27084.3	12597.3	12597.3	0.12058	0.130403	0.109911	0.112223	0.12557	0.133963	0.0985969	0.103289	0.132008	0.12557	0.152524	0.1272	415.872	212.652	357.217	296.608	410.461	192.968	284.553	306.641	185.423	667.716	313.351	288.883	0	0	0	0	0	0	0	0	0
2000034	0701R	Col	R	12.9	47856.4	47856.4	49052.8	48454.6	52043.9	53359.9	52043.9	50249.3	48454.6	47856.4	45463.6	45463.6	0.290566	0.355545	0.318393	0.306995	0.300586	0.293176	0.250947	0.245312	0.304898	0.295672	0.271769	0.4429	4173.7	3109.71	3430.42	5270.49	4721.65	5095.34	5518.89	4852.83	3861.27	5034.67	4880.18	4816.36	0	0	0	0	0	0	0	0	0
2000034	0705R	Lechuga	R	4.2	38242.6	34936	33890.4	30756.2	30357.1	33406.4	34551.7	34551.7	33769.7	30715.5	27894.1	27894.1	0.370262	0.564456	0.417599	0.432874	0.491449	0.377642	0.468861	0.29795	0.442041	0.418534	0.335916	0.2512	2477.16	1831.28	3222.96	2676.32	2822.65	3409.66	3536.08	3688.97	2881.84	2610.87	2376.9	2364.05	0	0	0	0	0	0	0	0	0
2000034	0717R	Tomate	R	3.6	21393.6	31784.8	26894.9	24449.9	22982.9	26039.1	33007.3	36430.3	37393.6	36674.8	36674.8	36674.8	0.474603	0.57627	0.394705	0.408232	0.373602	0.325039	0.378172	0.275008	0.302481	0.300486	0.291476	0.3256	2867.23	4084.22	3317.28	2921.37	2395.89	2762.72	4793.14	4184.86	4906.8	4775.72	4641.98	4267.93	0	0	0	0	0	0	765.352	0	0
2000034	0718R	Pimiento	R	40.5	19800	28235.3	23529.4	16470.6	25823.5	23529.4	26211.8	26235.3	25027.1	19176.5	15082.4	18823.5	0.994582	0.749295	0.732494	0.875194	0.850106	0.701278	0.838824	0.656881	0.615937	0.693745	0.654739	0.9148	5578.08	4767.87	4054.83	4136.77	7539.56	6910.3	6418.23	6373.83	6164.53	4704.82	3709.5	4604.61	0	0	0	0	0	0	0	0	0
2000034	0722R	Coliflor	R	18.6	39308.9	39308.9	42453.6	40432	40432	40993.5	43200.4	40656.6	40432	38522.7	39308.9	39308.9	0.397787	0.492022	0.494971	0.451663	0.376109	0.403593	0.547638	0.323077	0.416566	0.514016	0.386187	0.3787	4014.16	3387.23	4212.89	6089.17	4179.79	5189.72	6342.89	4050.5	4241.8	4816.88	5049.81	5765.84	0	0	0	0	0	0	0	0	0
2000034	0723R	Ajo	R	15.5	11956.5	12500	12282.6	9918.48	13587	13260.9	31847.8	12500	13043.5	12500	10869.6	13043.5	0.988823	1.13443	1.48269	1.35448	1.26403	1.20787	1.69567	1.86626	1.35089	1.17737	0.943399	1.3569	2938.07	2272.34	2923.44	4333.38	3961.61	3373.96	9358.51	4261.95	3969.46	6495.97	5386.62	5550.27	246.377	0	0	0	0	0	0	0	0
2000034	0724R	Cebolla	R	6.3	27535.1	29728.1	30451.4	22907.2	26877.8	27061.1	27641.4	27794.1	27757.5	27030.5	26877.8	26352.5	0.18634	0.175012	0.19873	0.251551	0.164084	0.139574	0.248044	0.173705	0.202694	0.263377	0.181481	0.2555	2245.08	2228.02	2653.94	1676.93	2615.55	2198.16	2395.37	2639.12	1992.78	3417.9	3433.58	3917.98	0	0	0	0	0	0	0	0	0
2000034	1201R	Manzano	R	11.6	26344.3	25950.8	28064.8	24687.2	8815.59	24296.9	48471.9	44639	24646.6	39259.5	40892.2	46192	0.3622	0.279909	0.313305	0.388313	0.341306	0.261013	0.296591	0.302519	0.388573	0.418333	0.307462	0.3469	3390.24	2970.36	2723.33	12158.2	2036.19	5572.52	11309.2	9953.58	6438.3	11905.8	14316.3	11516.5	0	0	0	0	0	0	0	0	0
2000034	1302R	Vid	R	1	8246.27	8246.27	8530.45	6850.75	6850.75	7650	7167.91	8087.69	7358.21	6863.43	5328.36	6013.43	0.476906	0.557499	0.53334	0.563065	0.536381	0.568517	0.618308	0.596894	0.612917	0.619928	0.804649	0.7017	993.728	829.55	1212.96	191.736	1091.32	1019.9	1127.58	1645.44	1641.21	1926.99	1228.83	1289.56	0	0	0	0	0	56.1504	32.3418	0	6.49468
2000034	1302S	Vid (Secano)	S	47	3979.14	5435.16	4682.93	3399.16	3405.89	3700.59	3178.47	3902.44	3064.09	2973.93	2644.24	2864.93	0.476906	0.557499	0.53334	0.563065	0.536381	0.568517	0.618308	0.596894	0.612917	0.619928	0.804649	0.7017	1368.26	2343.2	2619.03	1850.84	951.95	1216.93	1257.88	1578.77	1495.71	1435.89	1361.55	1606.94	0	0	0	0	0	0	0	0	0
2000035	0101R	Trigo	R	84	6151.71	6151.71	6041.86	6481.27	6151.71	6041.86	6261.56	6206.64	6151.71	7030.53	6688.89	7030.53	0.162961	0.154143	0.147643	0.215924	0.219547	0.160616	0.174271	0.228528	0.249617	0.214031	0.21084	0.2024	643.264	697.832	1386.76	1441.08	711.583	789.605	884.144	949.243	1244.67	1466.51	1443.53	1634.9	273.003	259.901	0	0	43.3779	51.0002	0	0	0
2000035	0101S	Trigo (Secano)	S	23	2832.57	2430.94	2219.55	3593.56	4016.33	1796.78	3065.1	3012.25	3117.94	3382.17	2219.55	3170.79	0.162961	0.154143	0.147643	0.215924	0.219547	0.160616	0.174271	0.228528	0.249617	0.214031	0.21084	0.2024	300.381	251.748	406.629	512.746	540.645	253.446	356.615	414.19	533.964	622.535	389.761	550.619	166.336	159.51	48.9778	0	40.8705	42.7841	0	0	0
2000035	0102R	Cebada	R	6	6256.31	6314.34	6144.79	6601.1	6599.96	6373.51	6372.37	6315.48	5917.2	6258.58	5917.2	5803.41	0.145456	0.146635	0.133229	0.18851	0.170202	0.124946	0.150448	0.193469	0.224847	0.181234	0.163886	0.174	638.511	583.523	514.083	1354.7	643.023	747.561	899.246	944.33	1171.45	1295.99	1210.58	1361.93	286.109	241.572	57.5417	0	58.1515	65.4687	0	0	0
2000035	0102S	Cebada (Secano)	S	5	2776.57	2665.51	2607.88	3654.59	4377.55	1978.17	2933.73	3248.06	2671.79	3667.17	2305.08	2837.34	0.145456	0.146635	0.133229	0.18851	0.170202	0.124946	0.150448	0.193469	0.224847	0.181234	0.163886	0.174	326.562	296.857	300.178	589.544	666.917	283.997	373.927	489.116	488.888	679.52	417.697	529.083	176.321	154.474	41.8553	0	40.8404	46.9423	0	0	0
2000035	0103R	Avena	R	36.7	3784.05	3941.71	3678.93	4309.61	4519.83	3941.71	3889.16	4046.83	3784.05	3784.05	3573.82	3731.49	0.143959	0.156241	0.135667	0.16243	0.171606	0.12715	0.139837	0.18026	0.218604	0.167795	0.160668	0.1821	629.76	628.948	563.477	639.424	655.082	570.73	562.566	481.139	550.611	548.44	519.251	539.229	0	0	0	0	0	0	0	0	0
2000035	0103S	Avena (Secano)	S	9	2989.24	2693.73	2727.83	3750.76	4205.4	1193.42	2727.83	2727.83	2614.17	2614.17	2045.87	2159.53	0.143959	0.156241	0.135667	0.16243	0.171606	0.12715	0.139837	0.18026	0.218604	0.167795	0.160668	0.1821	730.322	293.708	298.994	816.969	505.322	135.8	369.551	443.469	552.994	563.144	436.304	446.909	0	149.517	19.8624	0	75.4525	50.389	0	0	0
2000035	0104S	Centeno (Secano)	S	0.2	2051.23	2051.23	1794.82	2487.11	2435.83	1410.22	1923.03	2307.63	1987.13	2307.63	2051.23	3076.84	0.143037	0.144979	0.135667	0.182657	0.160774	0.12204	0.146644	0.182346	0.220718	0.170001	0.152223	0.1638	242.29	262.953	215.921	509.56	429.761	245.919	273.856	400.912	452.312	518.564	486.754	733.781	171.967	153.702	38.824	0	91.4396	62.7433	0	0	0
2000035	0105S	Triticale (Secano)	S	1.8	2145.25	2621.97	2741.15	3098.69	3813.78	1906.89	3337.05	3337.05	3337.05	2502.79	2502.79	2502.79	0.156166	0.159443	0.147961	0.188715	0.185346	0.154804	0.174972	0.204791	0.22092	0.198886	0.181481	0.1764	419.914	492.064	493.8	540.747	650.118	324.739	567.734	563.301	492.651	298.107	353.574	412.697	0	0	0	0	0	0	0	0	0
2000035	0108R	Maiz	R	72	11622.6	11501.5	11622.6	9927.65	10411.9	11501.5	12349	12591.2	11501.5	12228	11985.8	14407.2	0.16895	0.149064	0.160998	0.209968	0.182538	0.144484	0.18298	0.215418	0.234614	0.199488	0.170622	0.1729	1298.19	1257.4	1436.53	2020.84	1496.78	1617.69	1772.25	2195.88	2683.62	3017.14	2805.33	3628.39	460.553	512.118	117.076	0	115.45	115.838	0	0	0
2000025	1207S	Cerezo (Secano)	S	13.5	3516.88	3321.49	3256.37	2474.84	3647.13	3256.37	3256.37	3126.11	3126.11	2605.09	2058.02	3256.37	1.41529	1.6142	1.74618	2.10225	1.98927	2.09261	1.78085	1.84491	1.90309	2.48914	2.3679	1.7635	643.563	341.078	350.799	624.164	510.386	492.309	493.05	797.315	688.266	1035.83	992.309	856.274	0	0	0	0	0	0	0	0	0
2000035	0204S	Garbanzos (Secano)	S	0	715.766	596.471	1002.07	656.118	1073.65	775.413	954.354	715.766	715.766	1192.94	811.201	775.413	0.636873	0.574725	0.594708	0.649413	0.659244	0.672021	0.628918	0.64824	0.658732	0.667067	0.551682	0.5891	355.234	227.123	393.224	394.802	387.932	272.278	364.419	416.61	384.234	777.968	519.944	490.929	211.377	161.155	0	0	141.407	153.582	0	0	80.4031
2000035	0205S	Guisantes secos (Secano)	S	0	908.211	681.158	794.684	749.274	1248.79	794.684	1021.74	1021.74	510.869	1135.26	624.395	681.158	0.183	0.168498	0.164072	0.226191	0.218243	0.187869	0.2031	0.222072	0.268346	0.260067	0.255984	0.2289	225.526	153.354	172.833	182.277	319.367	170.641	236.442	241.894	154.007	377.006	199.016	223.487	245.306	186.54	95.1786	0	118.359	112.431	50.6398	54.7533	0
2000035	0206R	Veza	R	2	1728.03	1728.03	1728.03	1749.63	1944.03	1836.03	1728.03	1728.03	1728.03	1620.03	1080.02	1134.02	0.200506	0.212333	0.194385	0.248677	0.290256	0.255703	0.240136	0.216113	0.265426	0.309312	0.347277	0.388	402.031	345.223	369.994	362.9	393.882	371.633	349.429	346.7	351.503	328.235	219.364	229.087	0	293.733	0	0	0	0	0	0	0
2000035	0402R	Remolacha	R	0	90527.7	102647	106311	107762	110042	116472	119526	115802	115441	94276.4	102491	120851	0.0700215	0.0607298	0.0463174	0.0360386	0.0372097	0.0371731	0.0358352	0.0309868	0.034739	0.0341005	0.034587	0.0381	2307.07	2593.89	2738.39	4215.06	3077.99	3172.55	3419.56	3899.7	4617.49	3786.9	3880.3	5008.02	0	6.56986	223.5	0	485.09	1443.1	1288.7	1123.75	982.056
2000035	0409R	Girasol	R	6	2680.19	2447.13	2563.66	2563.66	2575.31	3018.13	3146.31	3379.37	2913.25	3262.84	2330.6	2447.13	0.264769	0.278805	0.234343	0.404844	0.388245	0.225644	0.365759	0.377503	0.503866	0.340705	0.308668	0.364	394.234	406.033	335.366	946.719	496.321	548.927	718.716	862.036	979.014	1204.69	906.169	1104.37	273.084	149.528	65.8937	0	50.0776	57.2425	0	0	0
2000035	0409S	Girasol (Secano)	S	0	720.292	463.045	823.191	823.191	926.089	637.973	823.191	1028.99	617.393	977.539	874.64	823.191	0.264769	0.278805	0.234343	0.404844	0.388245	0.225644	0.365759	0.377503	0.503866	0.340705	0.308668	0.364	131.505	80.5195	152.557	185.062	203.559	123.001	183.585	264.737	201.3	330.67	304.982	314.315	194.114	161.928	71.4688	0	63.5273	43.9063	0.650639	0	0
2000035	0421R	Colza	R	5.2	0	2176.66	4353.31	4190.06	4353.31	3047.32	3482.65	2938.49	3264.98	3482.65	3591.48	3373.82	0	0	0	0	0	0	0	0	0	0.336994	0.327772	0	0	1117.62	2145.6	2000.54	2030.34	1419.84	1621.07	1357.1	1528.78	1392.49	1422.43	1337.5	0	0	0	0	0	0	0	0	0
2000035	0606R	Alfalfa	R	74	48229.7	42870.8	48229.7	42870.8	51445	49301.4	49301.4	49301.4	42870.8	69129.2	34296.6	34296.6	0.136358	0.138243	0.117224	0.128445	0.167895	0.145286	0.116414	0.139242	0.167351	0.166491	0.148804	0.1513	560.775	583.05	623.628	734.312	930.657	1540.06	1096.7	835.32	874.497	1743.35	211.367	958.395	0	0	0	0	16.0774	19.829	0	0	0
2000035	0606S	Alfalfa (Secano)	S	6	15286.4	10190.9	20381.8	15286.4	25477.3	9681.36	18343.6	18343.6	10190.9	21910.4	18343.6	9171.81	0.136358	0.138243	0.117224	0.128445	0.167895	0.145286	0.116414	0.139242	0.167351	0.166491	0.148804	0.1513	299.053	191.147	366.963	266.613	236.809	94.5884	242.855	236.111	141.081	390.727	1195.59	170.276	0	0	0	0	107.286	100.508	0	0	0
2000035	0610S	Veza para forraje (Secano)	S	1.5	15746.7	8398.23	14696.9	12597.3	17846.2	8398.23	15746.7	15746.7	7873.34	27084.3	12597.3	12597.3	0.12058	0.130403	0.109911	0.112223	0.12557	0.133963	0.0985969	0.103289	0.132008	0.12557	0.152524	0.1272	415.872	212.652	357.217	296.608	410.461	192.968	284.553	306.641	185.423	667.716	313.351	288.883	0	0	0	0	0	0	0	0	0
2000035	0701R	Col	R	0	47856.4	47856.4	49052.8	48454.6	52043.9	53359.9	52043.9	50249.3	48454.6	47856.4	45463.6	45463.6	0.290566	0.355545	0.318393	0.306995	0.300586	0.293176	0.250947	0.245312	0.304898	0.295672	0.271769	0.4429	4173.7	3109.71	3430.42	5270.49	4721.65	5095.34	5518.89	4852.83	3861.27	5034.67	4880.18	4816.36	0	0	0	0	0	0	0	0	0
2000035	0711R	Sandia	R	0	53333.3	53333.3	53333.3	56000	59333.3	53333.3	54666.7	46666.7	53333.3	50666.7	48000	48000	0.202463	0.218627	0.228832	0.24765	0.371897	0.231054	0.401795	0.241638	0.205413	0.272604	0.176353	0.2735	6807.02	6408.38	6460.5	15769.5	16321.1	8046.48	10498.5	6638.26	10033.3	9102.28	8954.52	5162.42	0	0	0	0	0	0	0	0	0
2000035	0723R	Ajo	R	0	11956.5	12500	12282.6	9918.48	13587	13260.9	31847.8	12500	13043.5	12500	10869.6	13043.5	0.988823	1.13443	1.48269	1.35448	1.26403	1.20787	1.69567	1.86626	1.35089	1.17737	0.943399	1.3569	2938.07	2272.34	2923.44	4333.38	3961.61	3373.96	9358.51	4261.95	3969.46	6495.97	5386.62	5550.27	246.377	0	0	0	0	0	0	0	0
2000035	0724R	Cebolla	R	0	27535.1	29728.1	30451.4	22907.2	26877.8	27061.1	27641.4	27794.1	27757.5	27030.5	26877.8	26352.5	0.18634	0.175012	0.19873	0.251551	0.164084	0.139574	0.248044	0.173705	0.202694	0.263377	0.181481	0.2555	2245.08	2228.02	2653.94	1676.93	2615.55	2198.16	2395.37	2639.12	1992.78	3417.9	3433.58	3917.98	0	0	0	0	0	0	0	0	0
2000035	0732R	Guisantes verdes	R	0	10000	12000	12000	13000	0	0	0	0	0	0	0	0	0.6796	0.661623	0.695398	0.746235	0.73276	0.612003	0.680769	0.598284	0.60325	0.655633	0.615728	0.5243	1730.58	1991.06	1911.21	2005.71	0	0	0	0	0	0	0	0	0	0	0	0	0	0	0	0	0
2000035	1201R	Manzano	R	1	26344.3	25950.8	28064.8	24687.2	8815.59	24296.9	48471.9	44639	24646.6	39259.5	40892.2	46192	0.3622	0.279909	0.313305	0.388313	0.341306	0.261013	0.296591	0.302519	0.388573	0.418333	0.307462	0.3469	3390.24	2970.36	2723.33	12158.2	2036.19	5572.52	11309.2	9953.58	6438.3	11905.8	14316.3	11516.5	0	0	0	0	0	0	0	0	0
2000035	1202R	Peral	R	0	37739.1	35122	36944.2	36044.7	33357.8	40714.8	39259.3	41607.7	35749.3	37035.5	35950.1	35083.8	0.544509	0.432065	0.4247	0.635142	0.538588	0.477539	0.469161	0.394089	0.459763	0.572388	0.446815	0.5097	5156.1	4570.26	5402.24	21049.6	5533.87	8730.63	7091.14	9765.2	9110.14	9266.11	8407.07	7657.34	0	115.232	0	238.224	0	0	0	0	0
2000035	1218S	Almendro (Secano)	S	0	416.667	583.333	1666.67	1666.67	1666.67	1666.67	1666.67	1666.67	1166.67	1250	1250	1250	1.55314	1.60106	1.02979	0.91113	0.868761	0.617514	0.727415	0.6832	0.903617	1.49862	1.48392	1.8548	438.603	588.723	1614.61	1564.1	1527.87	1526.36	1524.86	1512.95	1073.74	396.559	528.956	1142.52	0	0	0	0	0	0	0	0	0
2000035	1302R	Vid	R	0	8246.27	8246.27	8530.45	6850.75	6850.75	7650	7167.91	8087.69	7358.21	6863.43	5328.36	6013.43	0.476906	0.557499	0.53334	0.563065	0.536381	0.568517	0.618308	0.596894	0.612917	0.619928	0.804649	0.7017	993.728	829.55	1212.96	191.736	1091.32	1019.9	1127.58	1645.44	1641.21	1926.99	1228.83	1289.56	0	0	0	0	0	56.1504	32.3418	0	6.49468
2000035	1302S	Vid (Secano)	S	0	3979.14	5435.16	4682.93	3399.16	3405.89	3700.59	3178.47	3902.44	3064.09	2973.93	2644.24	2864.93	0.476906	0.557499	0.53334	0.563065	0.536381	0.568517	0.618308	0.596894	0.612917	0.619928	0.804649	0.7017	1368.26	2343.2	2619.03	1850.84	951.95	1216.93	1257.88	1578.77	1495.71	1435.89	1361.55	1606.94	0	0	0	0	0	0	0	0	0
2000040	0101R	Trigo	R	63	4613.78	4613.78	4531.39	4860.95	4613.78	4531.39	4696.17	4654.98	4613.78	5272.89	5016.66	5272.89	0.162961	0.154143	0.147643	0.215924	0.219547	0.160616	0.174271	0.228528	0.249617	0.214031	0.21084	0.2024	482.448	523.374	780.052	810.608	533.687	592.204	663.108	711.933	933.504	1099.88	1082.64	1226.17	273.003	259.901	0	0	43.3779	51.0002	0	0	0
2000040	0101S	Trigo (Secano)	S	175	2124.43	1823.2	1664.66	2695.17	3012.25	1347.59	2298.82	2259.19	2338.46	2536.63	1664.66	2378.09	0.162961	0.154143	0.147643	0.215924	0.219547	0.160616	0.174271	0.228528	0.249617	0.214031	0.21084	0.2024	225.286	188.811	304.972	288.419	405.484	190.085	267.461	310.643	400.473	466.901	292.321	412.964	166.336	159.51	48.9778	0	40.8705	42.7841	0	0	0
2000040	0102R	Cebada	R	5	4692.23	4735.75	4608.59	4950.82	4949.97	4780.13	4779.28	4736.61	4437.9	4693.94	4437.9	4352.56	0.145456	0.146635	0.133229	0.18851	0.170202	0.124946	0.150448	0.193469	0.224847	0.181234	0.163886	0.174	478.883	437.642	385.562	762.018	482.267	560.671	674.435	708.247	878.589	971.994	907.933	1021.45	286.109	241.572	57.5417	0	58.1515	65.4687	0	0	0
2000040	0102S	Cebada (Secano)	S	9	2082.43	1999.13	1955.91	2740.94	3283.16	1483.63	2200.3	2436.05	2003.84	2750.37	1728.81	2128	0.145456	0.146635	0.133229	0.18851	0.170202	0.124946	0.150448	0.193469	0.224847	0.181234	0.163886	0.174	244.922	222.643	225.134	331.619	500.188	212.997	280.445	366.837	366.666	509.64	313.273	396.813	176.321	154.474	41.8553	0	40.8404	46.9423	0	0	0
2000040	0103R	Avena	R	33.4	2838.03	2956.29	2759.2	3232.21	3389.87	2956.29	2916.87	3035.12	2838.03	2838.03	2680.37	2798.62	0.143959	0.156241	0.135667	0.16243	0.171606	0.12715	0.139837	0.18026	0.218604	0.167795	0.160668	0.1821	354.24	353.783	316.956	359.676	368.483	321.035	316.443	360.854	309.719	308.498	292.079	303.316	0	0	0	0	0	0	0	0	0
2000040	0103S	Avena (Secano)	S	93.1	2241.93	2020.3	2045.87	2813.07	3154.05	895.068	2045.87	2045.87	1960.63	1960.63	1534.4	1619.65	0.143959	0.156241	0.135667	0.16243	0.171606	0.12715	0.139837	0.18026	0.218604	0.167795	0.160668	0.1821	410.806	220.281	224.246	459.545	378.991	101.85	277.163	332.601	414.745	422.358	327.228	335.182	0	149.517	19.8624	0	75.4525	50.389	0	0	0
2000040	0104R	Centeno	R	4.5	2140.47	0	0	2604.24	2541.81	1962.1	2229.66	2497.22	2140.47	2318.84	2229.66	2586.4	0.143037	0.144979	0.135667	0.182657	0.160774	0.12204	0.146644	0.182346	0.220718	0.170001	0.152223	0.1638	337.537	0	0	366.122	349.068	269.191	407.293	339.596	295.115	318.448	306.956	354.145	0	0	0	0	0	0	0	0	0
2000040	0104S	Centeno (Secano)	S	125.2	1538.42	1538.42	1346.12	1865.34	1826.88	1057.66	1442.27	1730.72	1490.35	1730.72	1538.42	2307.63	0.143037	0.144979	0.135667	0.182657	0.160774	0.12204	0.146644	0.182346	0.220718	0.170001	0.152223	0.1638	181.717	197.215	161.941	286.627	322.321	184.439	205.392	300.684	339.234	388.923	365.066	550.336	171.967	153.702	38.824	0	91.4396	62.7433	0	0	0
2000040	0105S	Triticale (Secano)	S	79.7	1608.94	1966.48	2055.86	2324.02	2860.33	1430.17	2502.79	2502.79	2502.79	1877.09	1877.09	1877.09	0.156166	0.159443	0.147961	0.188715	0.185346	0.154804	0.174972	0.204791	0.22092	0.198886	0.181481	0.1764	236.202	276.786	277.762	304.17	365.691	182.666	319.35	316.857	369.488	223.58	265.18	309.523	0	0	0	0	0	0	0	0	0
2000040	0108R	Maiz	R	0	8716.96	8626.16	8716.96	7445.74	7808.94	8626.16	9261.77	9443.37	8626.16	9170.97	8989.36	10805.4	0.16895	0.149064	0.160998	0.209968	0.182538	0.144484	0.18298	0.215418	0.234614	0.199488	0.170622	0.1729	973.64	943.054	1077.4	1136.72	1122.59	1213.27	1329.19	1646.91	2012.72	2262.85	2104	2721.29	460.553	512.118	117.076	0	115.45	115.838	0	0	0
2000040	0203S	Lentejas (Secano)	S	0	502.21	167.403	585.912	837.017	837.017	544.061	669.613	669.613	585.912	920.718	549.083	418.508	0.5414	0.629713	0.644947	0.594483	0.609698	0.609097	0.718606	0.756694	0.800406	0.551626	0.464812	0.5955	231.338	104.355	244.568	485.182	473.943	307.759	352.379	396.548	396.083	763.137	495.882	357.739	144.673	0	0	0	0	0	24.8945	99.5551	86.0419
2000040	0204S	Garbanzos (Secano)	S	1.1	536.824	447.353	751.554	492.089	805.236	581.559	715.766	536.824	536.824	894.707	608.401	581.559	0.636873	0.574725	0.594708	0.649413	0.659244	0.672021	0.628918	0.64824	0.658732	0.667067	0.551682	0.5891	266.425	170.342	294.918	222.076	290.949	204.209	273.314	234.343	288.176	583.476	389.958	368.197	211.377	161.155	0	0	141.407	153.582	0	0	80.4031
2000040	0206R	Veza	R	10.4	1296.02	1296.02	1296.02	1312.22	1458.02	1377.02	1296.02	1296.02	1296.02	1215.02	810.014	850.514	0.200506	0.212333	0.194385	0.248677	0.290256	0.255703	0.240136	0.216113	0.265426	0.309312	0.347277	0.388	226.142	258.917	208.122	204.131	221.559	209.044	196.554	195.019	197.721	184.632	123.392	128.861	0	293.733	0	0	0	0	0	0	0
2000040	0206S	Veza (Secano)	S	33.4	554.452	158.415	554.452	514.849	792.075	554.452	554.452	633.66	356.434	633.66	475.245	475.245	0.200506	0.212333	0.194385	0.248677	0.290256	0.255703	0.240136	0.216113	0.265426	0.309312	0.347277	0.388	123.555	39.0915	107.389	67.5727	101.55	71.015	115.073	80.447	45.8784	81.24	61.0805	60.7503	205.665	183.017	0	0	0	0	0	0	0
2000040	0303R	Patata	R	1	38611.6	37493.6	42068.7	39583	38645	43061.8	38165.2	41995.9	40507.3	39039.3	47134.4	34319.6	0.255555	0.189698	0.283946	0.251141	0.226568	0.150295	0.259555	0.211247	0.248208	0.348929	0.174342	0.2281	2761.71	2898.82	3443.32	3897.99	3599.99	4088.76	3638.98	4277.43	4807.95	4777.71	5594.91	4250.66	0	0	0	0	0	0	0	0	0
2000040	0402R	Remolacha	R	0	67895.8	76985.4	79733.4	80821.8	82531.1	87353.8	89644.5	86851.4	86581	70707.3	76868.5	90638.1	0.0700215	0.0607298	0.0463174	0.0360386	0.0372097	0.0371731	0.0358352	0.0309868	0.034739	0.0341005	0.034587	0.0381	1730.3	1945.42	2053.8	2370.97	2308.49	2379.41	2564.67	2924.77	3463.12	2840.18	2910.22	3756.02	0	6.56986	223.5	0	485.09	1443.1	1288.7	1123.75	982.056
2000040	0409R	Girasol	R	0	2010.14	1835.35	1922.74	1922.74	1931.48	2263.59	2359.73	2534.53	2184.94	2447.13	1747.95	1835.35	0.264769	0.278805	0.234343	0.404844	0.388245	0.225644	0.365759	0.377503	0.503866	0.340705	0.308668	0.364	295.676	304.525	251.525	532.529	372.241	411.695	539.037	646.527	734.261	903.514	679.627	828.277	273.084	149.528	65.8937	0	50.0776	57.2425	0	0	0
2000040	0409S	Girasol (Secano)	S	0	540.219	347.284	617.393	617.393	694.567	478.48	617.393	771.741	463.045	733.154	655.98	617.393	0.264769	0.278805	0.234343	0.404844	0.388245	0.225644	0.365759	0.377503	0.503866	0.340705	0.308668	0.364	98.6291	60.3896	114.418	104.098	152.669	92.2509	137.689	198.553	150.975	248.002	228.736	235.737	194.114	161.928	71.4688	0	63.5273	43.9063	0.650639	0	0
2000040	0606R	Alfalfa	R	11	36172.2	32153.1	36172.2	32153.1	38583.7	36976.1	36976.1	36976.1	32153.1	51846.9	25722.5	25722.5	0.136358	0.138243	0.117224	0.128445	0.167895	0.145286	0.116414	0.139242	0.167351	0.166491	0.148804	0.1513	420.581	437.288	467.721	413.05	697.993	1155.05	822.523	626.49	655.873	1307.51	158.526	718.796	0	0	0	0	16.0774	19.829	0	0	0
2000040	0606S	Alfalfa (Secano)	S	12	11464.8	7643.18	15286.4	11464.8	19107.9	7261.02	13757.7	13757.7	7643.18	16432.8	13757.7	6878.86	0.136358	0.138243	0.117224	0.128445	0.167895	0.145286	0.116414	0.139242	0.167351	0.166491	0.148804	0.1513	168.217	107.52	206.416	149.97	177.607	70.9413	182.141	177.083	105.81	293.045	896.691	127.707	0	0	0	0	107.286	100.508	0	0	0
2000040	0610S	Veza para forraje (Secano)	S	57.4	11810	6298.67	11022.7	9448.01	13384.7	6298.67	11810	11810	5905	20313.2	9448.01	9448.01	0.12058	0.130403	0.109911	0.112223	0.12557	0.133963	0.0985969	0.103289	0.132008	0.12557	0.152524	0.1272	233.928	119.617	200.934	166.842	230.884	108.544	213.415	229.981	139.067	500.787	235.013	162.497	0	0	0	0	0	0	0	0	0
2000040	0701R	Col	R	0	35892.3	35892.3	36789.6	36341	39032.9	40019.9	39032.9	37686.9	36341	35892.3	34097.7	34097.7	0.290566	0.355545	0.318393	0.306995	0.300586	0.293176	0.250947	0.245312	0.304898	0.295672	0.271769	0.4429	3130.27	2332.28	2572.82	2964.65	3541.24	3821.51	3104.38	3639.63	2895.95	3776	3660.14	2709.2	0	0	0	0	0	0	0	0	0
2000040	0711R	Sandia	R	0	40000	40000	40000	42000	44500	40000	41000	35000	40000	38000	36000	36000	0.202463	0.218627	0.228832	0.24765	0.371897	0.231054	0.401795	0.241638	0.205413	0.272604	0.176353	0.2735	5105.26	4806.29	4845.38	8870.33	9180.63	6034.86	7873.88	4978.69	7524.95	6826.71	6715.89	3871.81	0	0	0	0	0	0	0	0	0
2000040	0723R	Ajo	R	0	8967.39	9375	9211.96	7438.86	10190.2	9945.65	23885.9	9375	9782.61	9375	8152.17	9782.61	0.988823	1.13443	1.48269	1.35448	1.26403	1.20787	1.69567	1.86626	1.35089	1.17737	0.943399	1.3569	2203.55	1704.26	2192.58	2437.52	2971.21	2530.47	7018.88	3196.46	2977.09	4871.98	4039.97	3122.03	246.377	0	0	0	0	0	0	0	0
2000040	0724R	Cebolla	R	0	20651.3	22296.1	22838.5	17180.4	20158.4	20295.8	20731.1	20845.6	20818.1	20272.9	20158.4	19764.4	0.18634	0.175012	0.19873	0.251551	0.164084	0.139574	0.248044	0.173705	0.202694	0.263377	0.181481	0.2555	1683.81	1671.01	1990.46	943.275	1961.66	1648.62	1796.53	1979.34	1120.94	2563.42	2575.19	2938.48	0	0	0	0	0	0	0	0	0
2000040	0732R	Guisantes verdes	R	0	7500	9000	9000	9750	0	0	0	0	0	0	0	0	0.6796	0.661623	0.695398	0.746235	0.73276	0.612003	0.680769	0.598284	0.60325	0.655633	0.615728	0.5243	973.45	1119.97	1075.05	1128.21	0	0	0	0	0	0	0	0	0	0	0	0	0	0	0	0	0
2000040	1201R	Manzano	R	0.4	19758.2	19463.1	21048.6	18515.4	6611.69	18222.7	36353.9	33479.2	18484.9	29444.7	30669.2	34644	0.3622	0.279909	0.313305	0.388313	0.341306	0.261013	0.296591	0.302519	0.388573	0.418333	0.307462	0.3469	2542.68	2227.77	2042.5	6839	1527.14	4179.39	8481.89	7465.18	4828.72	8929.31	10737.3	8637.41	0	0	0	0	0	0	0	0	0
2000040	1202R	Peral	R	0	28304.4	26341.5	27708.2	27033.5	25018.4	30536.1	29444.5	31205.7	26812	27776.6	26962.6	26312.8	0.544509	0.432065	0.4247	0.635142	0.538588	0.477539	0.469161	0.394089	0.459763	0.572388	0.446815	0.5097	3867.07	3427.69	4051.68	11840.4	4150.4	6547.97	5318.35	7323.9	6832.61	6949.58	6305.31	5743	0	115.232	0	238.224	0	0	0	0	0
2000040	1218S	Almendro (Secano)	S	12	312.5	437.5	1250	1250	1250	1250	1250	1250	875	937.5	937.5	937.5	1.55314	1.60106	1.02979	0.91113	0.868761	0.617514	0.727415	0.6832	0.903617	1.49862	1.48392	1.8548	246.714	331.156	908.216	879.806	859.426	858.58	857.735	851.037	603.979	297.419	396.717	642.669	0	0	0	0	0	0	0	0	0
2000040	1302R	Vid	R	0	6184.7	6184.7	6397.84	5138.06	5138.06	5737.5	5375.93	6065.76	5518.66	5147.57	3996.27	4510.07	0.476906	0.557499	0.53334	0.563065	0.536381	0.568517	0.618308	0.596894	0.612917	0.619928	0.804649	0.7017	745.296	622.162	909.718	143.802	818.491	764.923	845.684	1234.08	1230.91	1445.25	921.619	967.173	0	0	0	0	0	56.1504	32.3418	0	6.49468
2000040	1302S	Vid (Secano)	S	0.4	2984.36	4076.37	3512.2	2549.37	2554.42	2775.44	2383.85	2926.83	2298.07	2230.45	1983.18	2148.7	0.476906	0.557499	0.53334	0.563065	0.536381	0.568517	0.618308	0.596894	0.612917	0.619928	0.804649	0.7017	1026.2	1757.4	1964.27	1041.1	713.962	912.694	943.406	1184.08	1121.78	1076.92	1021.17	1205.21	0	0	0	0	0	0	0	0	0
2000042	0101R	Trigo	R	47	3276.4	2975.36	4093.08	3648.97	4011.86	2608	3348.68	3602.77	3716.03	3719.01	2608	3724.98	0.162961	0.154143	0.147643	0.215924	0.219547	0.160616	0.174271	0.228528	0.249617	0.214031	0.21084	0.2024	342.602	337.516	510.125	440.549	464.061	340.838	472.839	551.008	751.863	775.758	562.832	866.216	273.003	259.901	0	0	43.3779	51.0002	0	0	0
2000042	0101S	Trigo (Secano)	S	798	1561.87	1013.54	1742.7	2248.74	2916.65	768.537	1457.6	2256.76	1962.91	2754.78	1622.39	1802.49	0.162961	0.154143	0.147643	0.215924	0.219547	0.160616	0.174271	0.228528	0.249617	0.214031	0.21084	0.2024	165.629	104.962	319.268	214.774	392.615	108.407	169.587	310.309	336.158	507.054	284.897	313.009	166.336	159.51	48.9778	0	40.8705	42.7841	0	0	0
2000042	0102R	Cebada	R	17	3634.1	2817.13	3873.56	3648.89	4225.7	2464.99	3014.33	3215.05	3523.53	3521.42	2464.99	3521.42	0.145456	0.146635	0.133229	0.18851	0.170202	0.124946	0.150448	0.193469	0.224847	0.181234	0.163886	0.174	370.892	260.338	324.068	414.09	411.703	289.124	425.372	480.735	697.567	729.195	504.303	826.397	286.109	241.572	57.5417	0	58.1515	65.4687	0	0	0
2000042	0102S	Cebada (Secano)	S	82	1745.35	1196.41	1829.8	2125.39	3026.22	633.394	1484.96	1914.26	1591.23	2629.29	1196.41	1571.52	0.145456	0.146635	0.133229	0.18851	0.170202	0.124946	0.150448	0.193469	0.224847	0.181234	0.163886	0.174	205.277	133.244	210.619	206.199	461.042	90.9332	189.269	288.263	291.164	487.203	216.799	293.044	176.321	154.474	41.8553	0	40.8404	46.9423	0	0	0
2000042	0103R	Avena	R	45.8	2079.75	2228.3	2822.51	2376.85	2971.06	2005.47	2748.23	2969.58	2965.12	2971.06	2599.68	2971.06	0.143959	0.156241	0.135667	0.16243	0.171606	0.12715	0.139837	0.18026	0.218604	0.167795	0.160668	0.1821	238.057	244.543	297.332	242.552	296.167	199.716	273.416	353.062	296.745	296.167	259.786	295.294	0	0	0	0	0	0	0	0	0
2000042	0103S	Avena (Secano)	S	29	1262.86	947.148	1420.72	1657.51	2367.87	473.574	1420.72	1657.51	1221.03	2326.83	949.516	1172.88	0.143959	0.156241	0.135667	0.16243	0.171606	0.12715	0.139837	0.18026	0.218604	0.167795	0.160668	0.1821	153.486	103.271	155.724	179.598	284.524	53.8881	192.472	269.465	258.293	501.245	202.495	242.726	0	149.517	19.8624	0	75.4525	50.389	0	0	0
2000042	0104R	Centeno	R	0	1736.18	2083.41	2083.41	2222.31	2430.65	1736.18	1736.18	2777.89	2424.4	2777.89	2430.65	2430.65	0.143037	0.144979	0.135667	0.182657	0.160774	0.12204	0.146644	0.182346	0.220718	0.170001	0.152223	0.1638	259.987	299.119	287.123	296.684	316.981	226.192	317.148	358.728	317.418	362.264	317.764	316.047	0	0	0	0	0	0	0	0	0
2000042	0104S	Centeno (Secano)	S	14.6	1174.25	728.845	971.794	809.828	2024.57	647.863	1133.76	1498.18	1141.86	2518.57	1152.39	1415.58	0.143037	0.144979	0.135667	0.182657	0.160774	0.12204	0.146644	0.182346	0.220718	0.170001	0.152223	0.1638	138.702	93.433	116.909	91.8669	357.201	112.976	161.457	260.284	259.911	565.964	273.46	337.595	171.967	153.702	38.824	0	91.4396	62.7433	0	0	0
2000042	0105S	Triticale (Secano)	S	15.4	1065.4	608.799	760.999	760.999	1902.5	608.799	1065.4	1369.8	1141.5	1148.35	1369.8	913.199	0.156166	0.159443	0.147961	0.188715	0.185346	0.154804	0.174972	0.204791	0.22092	0.198886	0.181481	0.1764	84.7167	46.4133	55.6899	53.9478	131.745	42.117	73.6323	93.9308	168.52	136.779	193.514	150.582	0	0	0	0	0	0	0	0	0
2000042	0108R	Maiz	R	227	7379.98	6401.01	7530.59	7530.59	8283.65	7154.06	8283.65	9036.71	8288.17	8680.52	8810.8	9789.77	0.16895	0.149064	0.160998	0.209968	0.182538	0.144484	0.18298	0.215418	0.234614	0.199488	0.170622	0.1729	824.306	699.789	930.765	1053.06	1190.83	1006.22	1188.82	1575.99	1933.86	2141.84	2062.2	2465.51	460.553	512.118	117.076	0	115.45	115.838	0	0	0
2000042	0204S	Garbanzos (Secano)	S	0.8	516.413	344.275	413.131	275.42	172.138	344.275	550.841	481.986	344.275	206.565	413.131	240.993	0.636873	0.574725	0.594708	0.649413	0.659244	0.672021	0.628918	0.64824	0.658732	0.667067	0.551682	0.5891	256.295	131.093	162.117	71.5764	62.197	120.889	210.338	121.163	184.813	134.71	264.798	152.577	211.377	161.155	0	0	141.407	153.582	0	0	80.4031
2000042	0205S	Guisantes secos (Secano)	S	5	555.755	138.939	555.755	764.163	694.694	277.878	243.143	833.633	590.49	1026.06	694.694	555.755	0.183	0.168498	0.164072	0.226191	0.218243	0.187869	0.2031	0.222072	0.268346	0.260067	0.255984	0.2289	138.005	31.2803	120.869	126.806	177.662	59.6682	56.266	197.36	178.01	340.742	221.422	182.342	245.306	186.54	95.1786	0	118.359	112.431	50.6398	54.7533	0
2000042	0206S	Veza (Secano)	S	20.9	564.475	141.119	705.594	564.475	705.594	211.678	635.034	493.916	493.916	481.921	423.356	352.797	0.200506	0.212333	0.194385	0.248677	0.290256	0.255703	0.240136	0.216113	0.265426	0.309312	0.347277	0.388	125.789	34.8233	136.663	69.2857	84.601	25.3553	131.797	58.6426	59.4551	57.7825	50.886	42.1758	205.665	183.017	0	0	0	0	0	0	0
2000042	0303R	Patata	R	0	34692.6	29941.5	30695.9	28888	30423.5	33298.7	32925.1	32383.9	34457	33230.8	33282.8	36129.8	0.255555	0.189698	0.283946	0.251141	0.226568	0.150295	0.259555	0.211247	0.248208	0.348929	0.174342	0.2281	2481.4	2314.93	2512.46	2269.73	2834.11	3161.74	3139.35	3298.41	4089.82	4066.85	3950.71	4474.86	0	0	0	0	0	0	0	0	0
2000042	0402R	Remolacha	R	182	56738.1	63201.9	60323.3	57456.3	64638.3	64638.3	59610.9	79663.1	71349.2	63097	74058.2	74065.4	0.0700215	0.0607298	0.0463174	0.0360386	0.0372097	0.0371731	0.0358352	0.0309868	0.034739	0.0341005	0.034587	0.0381	1445.95	1597.11	1553.82	1374.34	1808.01	1760.67	1705.43	2682.7	2853.87	2534.49	2803.82	3069.25	0	6.56986	223.5	0	485.09	1443.1	1288.7	1123.75	982.056
2000042	0409R	Girasol	R	62	1204	1416.47	1770.59	1912.23	1770.59	1770.59	2124.7	2124.7	2124.7	2124.7	2124.7	2124.7	0.264769	0.278805	0.234343	0.404844	0.388245	0.225644	0.365759	0.377503	0.503866	0.340705	0.308668	0.364	177.099	235.024	231.62	456.229	341.232	322.029	485.35	541.986	714.019	784.47	826.114	958.862	273.084	149.528	65.8937	0	50.0776	57.2425	0	0	0
2000042	0409S	Girasol (Secano)	S	40	655.36	206.956	551.882	827.823	758.838	310.434	689.852	827.823	344.926	620.867	551.882	551.882	0.264769	0.278805	0.234343	0.404844	0.388245	0.225644	0.365759	0.377503	0.503866	0.340705	0.308668	0.364	119.651	35.9878	102.277	133.834	166.796	59.8516	153.849	212.982	112.463	210.019	192.438	210.723	194.114	161.928	71.4688	0	63.5273	43.9063	0.650639	0	0
2000042	0421R	Colza	R	11.9	0	0	1398.28	1538.11	2097.42	2097.42	1747.85	2446.99	2446.99	2446.99	2377.08	2307.17	0	0	0	0	0	0	0	0	0	0.336994	0.327772	0	0	0	479.079	510.502	680.013	679.344	565.563	785.605	796.489	978.396	941.456	914.642	0	0	0	0	0	0	0	0	0
2000042	0421S	Colza (Secano)	S	31.1	0	695.044	556.036	764.549	1390.09	347.522	1042.57	1529.1	1042.57	2085.13	1737.61	1390.09	0	0	0	0	0	0	0	0	0	0.336994	0.327772	0	0	216.284	166.088	221.227	392.914	98.1318	294.106	427.987	295.852	869.001	654.444	532.911	0	0	0	0	0	0	0	0	0
2000042	0602R	Maíz forrajero	R	1.4	53806.3	59345.2	59345.2	55388.9	55388.9	47476.2	55388.9	51432.5	51432.5	51432.5	51432.5	51432.5	0.0413174	0.0364542	0.0393728	0.0513487	0.0446405	0.0353342	0.0447485	0.0526814	0.0573758	0.0487857	0.0478587	0.0318	1445.86	1528.94	1467.63	1326.94	1296.2	1109.93	1293.65	1191.86	1208.38	1617.16	1189.24	1506.65	0	0	0	0	0	0	0	0	0
2000042	0606R	Alfalfa	R	267	40942.3	40942.3	40942.3	37220.3	40942.3	40942.3	40942.3	40942.3	40942.3	40942.3	44664.3	40942.3	0.136358	0.138243	0.117224	0.128445	0.167895	0.145286	0.116414	0.139242	0.167351	0.166491	0.148804	0.1513	476.043	556.822	529.4	547.648	740.66	1278.94	910.751	693.69	835.158	1032.51	275.263	1144.1	0	0	0	0	16.0774	19.829	0	0	0
2000042	0606S	Alfalfa (Secano)	S	52	12583.3	3495.35	15379.6	13981.4	17476.8	12583.3	12583.3	10486.1	6990.71	8439.88	7187.85	1048.61	0.136358	0.138243	0.117224	0.128445	0.167895	0.145286	0.116414	0.139242	0.167351	0.166491	0.148804	0.1513	161.07	42.8966	181.176	159.553	162.445	122.941	166.593	134.972	96.7778	150.508	468.484	19.4675	0	0	0	0	107.286	100.508	0	0	0
2000042	0610R	Veza para forraje	R	27	29063.6	21797.7	25430.6	21797.7	29063.6	25430.6	21797.7	21797.7	18164.7	21797.7	21797.7	21797.7	0.12058	0.130403	0.109911	0.112223	0.12557	0.133963	0.0985969	0.103289	0.132008	0.12557	0.152524	0.1272	488.268	351.1	393.189	326.477	425.219	371.7	318.287	315.802	266.814	318.914	319.702	319.431	0	0	0	0	0	0	0	0	0
2000042	0610S	Veza para forraje (Secano)	S	18.6	17674.9	1060.49	15553.9	7069.96	14139.9	10604.9	10604.9	8483.95	7069.96	7003.5	6009.47	4418.73	0.12058	0.130403	0.109911	0.112223	0.12557	0.133963	0.0985969	0.103289	0.132008	0.12557	0.152524	0.1272	357.428	20.5613	289.472	127.462	249.019	186.581	191.638	165.212	166.503	172.659	149.482	77.5891	0	0	0	0	0	0	0	0	0
2000042	0701R	Col	R	0	25000	25000	33333.3	33333.3	29166.7	29166.7	29166.7	29166.7	29166.7	31083.3	31083.3	29166.7	0.290566	0.355545	0.318393	0.306995	0.300586	0.293176	0.250947	0.245312	0.304898	0.295672	0.271769	0.4429	2180.32	1624.5	2331.11	2150.44	2646.13	2785.13	1834.43	2816.78	2324.24	3270.08	3336.57	1832.63	0	0	0	0	0	0	0	0	0
2000042	0711R	Sandia	R	2.5	0	0	25000	25000	25000	25000	30000	40000	40000	40000	40000	40000	0.202463	0.218627	0.228832	0.24765	0.371897	0.231054	0.401795	0.241638	0.205413	0.272604	0.176353	0.2735	0	0	3028.36	4529.33	4424.42	3771.79	5761.37	5689.94	7524.95	7186.01	7462.1	4302.01	0	0	0	0	0	0	0	0	0
2000042	0712R	Melón	R	2.5	0	0	14814.8	11111.1	14814.8	14814.8	14814.8	22222.2	25925.9	22222.2	25925.9	25925.9	0.342507	0.28532	0.328674	0.355663	0.421844	0.301493	0.370564	0.258124	0.275395	0.336392	0.26463	0.4248	0	0	2476.78	1917.54	2453.64	2977.67	2614.47	3469.47	4149.09	3668.94	4590.11	5749.45	59.3455	0	0	0	0	32.8045	0	0	0
2000042	0723R	Ajo	R	0	6818.18	6136.36	6136.36	6818.18	6136.36	6818.18	6818.18	5454.55	5454.55	8181.82	8181.82	6579.55	0.988823	1.13443	1.48269	1.35448	1.26403	1.20787	1.69567	1.86626	1.35089	1.17737	0.943399	1.3569	1675.43	1115.51	1460.54	1435.81	1789.21	1734.75	2003.53	1859.76	1659.95	4251.91	4054.66	1349.47	246.377	0	0	0	0	0	0	0	0
2000042	0724R	Cebolla	R	0	33162.4	27350.4	26761	26948.4	30769.2	24691.3	27106.3	27350.4	32173.7	27350.4	26666.7	26666.7	0.18634	0.175012	0.19873	0.251551	0.164084	0.139574	0.248044	0.173705	0.202694	0.263377	0.181481	0.2555	2703.9	2049.82	2332.32	2143.01	2994.23	2005.66	2349	2596.99	2509.16	3458.35	3406.61	3964.69	0	0	0	0	0	0	0	0	0
2000042	0732R	Guisantes verdes	R	0	0	3409.09	5454.55	4772.73	5454.55	5113.64	2727.27	4227.27	6034.09	6034.09	6034.09	6034.09	0.6796	0.661623	0.695398	0.746235	0.73276	0.612003	0.680769	0.598284	0.60325	0.655633	0.615728	0.5243	0	255.722	392.746	332.903	371.647	348.076	185.458	285.215	412.762	411.135	412.151	536.839	0	0	0	0	0	0	0	0	0
2000042	1201R	Manzano	R	0	14851.5	18564.4	25990.1	28217.8	25990.1	16336.6	2599.01	13310.6	13295.8	27931.2	27931.2	27931.2	0.3622	0.279909	0.313305	0.388313	0.341306	0.261013	0.296591	0.302519	0.388573	0.418333	0.307462	0.3469	1911.23	2124.9	2522	8952.19	6003.08	3746.81	606.386	2968	3473.19	8470.34	9778.69	6963.78	0	0	0	0	0	0	0	0	0
2000042	1202R	Peral	R	0	17942.6	11510.5	22966.5	17224.9	18547.6	14354.1	2727.27	6875.6	7095.93	8829.19	8829.19	8829.19	0.544509	0.432065	0.4247	0.635142	0.538588	0.477539	0.469161	0.394089	0.459763	0.572388	0.446815	0.5097	2451.4	1497.81	3358.33	3297.18	3076.94	3078	492.608	1613.68	1808.29	2209.02	2064.74	1927.05	0	115.232	0	238.224	0	0	0	0	0
2000042	1218S	Almendro (Secano)	S	1	355.197	390.717	1562.87	710.394	497.276	710.394	816.953	1207.67	319.677	426.236	468.86	468.86	1.55314	1.60106	1.02979	0.91113	0.868761	0.617514	0.727415	0.6832	0.903617	1.49862	1.48392	1.8548	198.437	209.279	803.546	353.822	241.939	345.286	396.688	581.83	156.148	135.222	198.405	227.441	0	0	0	0	0	0	0	0	0
2000042	1302R	Vid	R	0	11250	12000	12750	12000	12225	12600	6000	0	0	0	0	0	0.476906	0.557499	0.53334	0.563065	0.536381	0.568517	0.618308	0.596894	0.612917	0.619928	0.804649	0.7017	1355.7	1207.16	1812.94	335.85	1947.44	1679.83	943.855	0	0	0	0	0	0	0	0	0	0	56.1504	32.3418	0	6.49468
2000042	1302S	Vid (Secano)	S	6	3030.79	2441.11	2708.11	1601.98	2326.68	2807.28	1907.12	2079.52	2155.81	2708.11	3007.91	2610.46	0.476906	0.557499	0.53334	0.563065	0.536381	0.568517	0.618308	0.596894	0.612917	0.619928	0.804649	0.7017	1042.16	1052.41	1514.57	559.904	650.311	923.164	754.74	841.293	1052.34	1307.54	1548.81	1464.21	0	0	0	0	0	0	0	0	0
2000042	1402R	Olivar	R	0	0	0	0	0	0	0	2727.27	1363.64	1363.64	2215.91	2215.91	2215.91	2.71019	3.28732	3.45681	2.54235	2.37026	1.95638	1.88335	1.77595	1.90863	2.52672	2.16219	3.19687	0	0	0	0	0	0	582.743	289.096	293.102	664.947	709.642	564.903	0	0	0	0	0	0	0	0	0
2000042	1402S	Olivar (Secano)	S	0	1193.03	573.649	2336.35	666.109	1668.25	334.049	1988.38	474.23	149.129	2386.06	2072.89	1511.17	2.71019	3.28732	3.45681	2.54235	2.37026	1.95638	1.88335	1.77595	1.90863	2.52672	2.16219	3.19687	132.449	63.384	304.285	214.02	260.68	50.3999	255.545	130.649	41.5617	742.375	550.909	305.412	139.79	210.147	152.583	0	74.0082	79.2558	3.9639	0	6.89745
2000047	0101R	Trigo	R	5	6075.15	3442.01	4516.56	5700.83	5937.47	3775.46	5087.72	5378.14	4631.66	5516.9	4291.76	5776.12	0.162961	0.154143	0.147643	0.215924	0.219547	0.160616	0.174271	0.228528	0.249617	0.214031	0.21084	0.2024	635.259	390.452	860.412	1052.04	686.801	493.411	718.395	822.533	937.12	1150.78	926.202	1343.2	273.003	259.901	0	0	43.3779	51.0002	0	0	0
2000047	0101S	Trigo (Secano)	S	28	3420.36	1176.49	2029.97	3957.27	4492.03	1689.86	3101.64	3754.06	2381.85	4226.79	2802.17	2962.6	0.162961	0.154143	0.147643	0.215924	0.219547	0.160616	0.174271	0.228528	0.249617	0.214031	0.21084	0.2024	362.714	121.837	371.897	605.322	604.68	238.365	360.867	516.19	407.904	777.998	492.072	514.467	166.336	159.51	48.9778	0	40.8705	42.7841	0	0	0
2000047	0102R	Cebada	R	1	5650.03	3451.54	4488.4	5603.78	5840.4	3931.25	4829.36	5302.61	4413.11	5182.15	3721.51	5259.59	0.145456	0.146635	0.133229	0.18851	0.170202	0.124946	0.150448	0.193469	0.224847	0.181234	0.163886	0.174	576.635	318.965	375.507	955.961	569.021	461.103	681.502	792.88	873.68	1073.09	761.369	1234.31	286.109	241.572	57.5417	0	58.1515	65.4687	0	0	0
2000047	0102S	Cebada (Secano)	S	273	3069.38	1277.68	2231.99	3802.49	4359.7	1704.28	3023.04	3111.51	2130.87	4053.18	2359.44	2601.71	0.145456	0.146635	0.133229	0.18851	0.170202	0.124946	0.150448	0.193469	0.224847	0.181234	0.163886	0.174	361.001	142.295	256.912	595.126	664.198	244.674	385.31	468.554	389.909	751.049	427.549	485.145	176.321	154.474	41.8553	0	40.8404	46.9423	0	0	0
2000047	0103R	Avena	R	0	3515.54	2450.23	2982.88	4101.46	4431.71	2471.53	3696.64	4279.37	3350.42	4458.34	1954.85	2759.17	0.143959	0.156241	0.135667	0.16243	0.171606	0.12715	0.139837	0.18026	0.218604	0.167795	0.160668	0.1821	520.527	347.831	406.465	541.406	571.449	318.379	475.727	508.787	433.731	574.883	252.692	354.733	0	0	0	0	0	0	0	0	0
2000047	0103S	Avena (Secano)	S	0	1301.65	833.059	1561.98	2551.24	3030.25	864.298	2020.17	2852.18	1502.63	2858.43	1249.59	1301.65	0.143959	0.156241	0.135667	0.16243	0.171606	0.12715	0.139837	0.18026	0.218604	0.167795	0.160668	0.1821	205.436	90.8316	171.208	358.975	364.115	98.3488	273.681	463.686	317.862	615.764	266.488	269.374	0	149.517	19.8624	0	75.4525	50.389	0	0	0
2000047	0104S	Centeno (Secano)	S	0	1191.38	704	1516.31	2610.21	2967.63	996.43	1700.43	3049.94	1914.88	3891.49	2220.31	2166.15	0.143037	0.144979	0.135667	0.182657	0.160774	0.12204	0.146644	0.182346	0.220718	0.170001	0.152223	0.1638	140.726	90.2479	182.415	472.028	523.588	173.761	242.156	529.877	435.867	874.484	526.876	516.595	171.967	153.702	38.824	0	91.4396	62.7433	0	0	0
2000047	0105S	Triticale (Secano)	S	0	1392.66	1285.53	1928.3	3213.83	3428.09	1285.53	2892.45	2678.19	2502.51	3428.09	2142.56	2142.56	0.156166	0.159443	0.147961	0.188715	0.185346	0.154804	0.174972	0.204791	0.22092	0.198886	0.181481	0.1764	233.801	206.917	297.928	481.014	501.197	187.764	422.053	387.738	369.446	408.319	302.683	353.296	0	0	0	0	0	0	0	0	0
2000047	0108R	Maiz	R	0	11566.9	10377.8	12431.7	11350.7	10810.2	10810.2	10810.2	11891.2	11891.2	11891.2	11891.2	12972.2	0.16895	0.149064	0.160998	0.209968	0.182538	0.144484	0.18298	0.215418	0.234614	0.199488	0.170622	0.1729	1291.97	1134.55	1536.54	2235.99	1554.04	1520.45	1551.41	2073.81	2774.55	2934.05	2783.19	3267	460.553	512.118	117.076	0	115.45	115.838	0	0	0
2000047	0203S	Lentejas (Secano)	S	0	1087.2	434.881	744.734	424.009	1087.2	434.881	1087.2	1087.2	652.322	1848.24	326.161	434.881	0.5414	0.629713	0.644947	0.594483	0.609698	0.609097	0.718606	0.756694	0.800406	0.551626	0.464812	0.5955	500.809	392.326	310.863	355.692	890.903	356.01	572.132	643.847	440.977	1531.92	294.559	371.734	144.673	0	0	0	0	0	24.8945	99.5551	86.0419
2000047	0204S	Garbanzos (Secano)	S	1.3	949.215	421.873	764.645	210.937	775.192	632.81	843.747	1054.68	843.747	949.215	527.342	632.81	0.636873	0.574725	0.594708	0.649413	0.659244	0.672021	0.628918	0.64824	0.658732	0.667067	0.551682	0.5891	471.094	160.64	300.055	106.445	280.093	222.205	322.184	514.822	452.937	619.023	338.003	400.645	211.377	161.155	0	0	141.407	153.582	0	0	80.4031
2000047	0205S	Guisantes secos (Secano)	S	26	1510.55	323.69	1456.6	253.557	1402.66	431.586	1078.97	1618.45	863.173	1834.24	863.173	863.173	0.183	0.168498	0.164072	0.226191	0.218243	0.187869	0.2031	0.222072	0.268346	0.260067	0.255984	0.2289	375.099	72.8748	316.792	79.3318	358.717	92.6738	249.685	383.164	260.213	609.127	275.122	283.206	245.306	186.54	95.1786	0	118.359	112.431	50.6398	54.7533	0
2000047	0206S	Veza (Secano)	S	3.7	1441.26	308.841	1029.47	324.283	1338.31	308.841	1029.47	1338.31	720.629	1544.2	926.523	411.788	0.200506	0.212333	0.194385	0.248677	0.290256	0.255703	0.240136	0.216113	0.265426	0.309312	0.347277	0.388	321.173	76.2115	199.393	71.4165	287.907	66.3747	213.659	285.097	155.641	332.201	199.813	88.3257	205.665	183.017	0	0	0	0	0	0	0
2000047	0303R	Patata	R	0	45963.4	44508.8	43563.3	45488	41104.6	55290.3	46680.9	54989.6	50132.9	50943.8	55823.3	50381.5	0.255555	0.189698	0.283946	0.251141	0.226568	0.150295	0.259555	0.211247	0.248208	0.348929	0.174342	0.2281	3287.55	3441.2	3565.66	5435.57	3829.11	5249.86	4450.95	5600.87	5950.45	6234.61	6626.29	6240	0	0	0	0	0	0	0	0	0
2000047	0402R	Remolacha	R	11	86783.2	91805.5	90012.6	102628	99366	97205.9	89645.4	116083	100898	89579.5	115508	108159	0.0700215	0.0607298	0.0463174	0.0360386	0.0372097	0.0371731	0.0358352	0.0309868	0.034739	0.0341005	0.034587	0.0381	2211.64	2319.93	2318.57	3774.51	2779.38	2647.78	2564.69	3909.17	4035.76	3598.24	4373.08	4482.07	0	6.56986	223.5	0	485.09	1443.1	1288.7	1123.75	982.056
2000047	0409R	Girasol	R	2	2121.49	1697.19	2333.64	2545.79	2757.94	2651.86	3182.23	2651.86	2121.49	2651.86	2333.64	2121.49	0.264769	0.278805	0.234343	0.404844	0.388245	0.225644	0.365759	0.377503	0.503866	0.340705	0.308668	0.364	312.054	281.602	305.276	776.5	531.517	482.312	726.923	676.457	712.939	979.103	907.35	957.411	273.084	149.528	65.8937	0	50.0776	57.2425	0	0	0
2000047	0409S	Girasol (Secano)	S	24	723.712	465.243	878.793	961.503	1137.26	413.55	1240.65	1240.65	599.647	1344.04	827.099	827.099	0.264769	0.278805	0.234343	0.404844	0.388245	0.225644	0.365759	0.377503	0.503866	0.340705	0.308668	0.364	132.13	80.9018	162.861	225.585	249.975	79.7324	276.685	319.193	195.514	454.644	288.405	315.808	194.114	161.928	71.4688	0	63.5273	43.9063	0.650639	0	0
2000047	0606R	Alfalfa	R	5	42341.5	39165.9	42341.5	40891.3	40224.4	37048.8	42341.5	38107.4	38107.4	37048.8	52926.9	52926.9	0.136358	0.138243	0.117224	0.128445	0.167895	0.145286	0.116414	0.139242	0.167351	0.166491	0.148804	0.1513	492.312	532.663	547.492	662.889	727.674	1157.32	941.876	645.658	777.33	934.322	326.184	1479	0	0	0	0	16.0774	19.829	0	0	0
2000047	0606S	Alfalfa (Secano)	S	38	10125.1	7087.57	14175.1	14175.1	14175.1	9112.59	15187.6	8606.33	8606.33	15187.6	10125.1	10125.1	0.136358	0.138243	0.117224	0.128445	0.167895	0.145286	0.116414	0.139242	0.167351	0.166491	0.148804	0.1513	152.13	102.1	196.01	189.879	131.757	89.0314	201.073	110.777	119.144	270.84	659.926	187.974	0	0	0	0	107.286	100.508	0	0	0
2000047	0610S	Veza para forraje (Secano)	S	9.3	14411.5	9264.57	18529.1	13382.1	13382.1	1801.44	12352.8	7205.77	7205.77	10294	10294	10294	0.12058	0.130403	0.109911	0.112223	0.12557	0.133963	0.0985969	0.103289	0.132008	0.12557	0.152524	0.1272	339.408	209.193	401.607	280.977	274.468	36.9112	223.222	140.321	169.701	253.78	256.056	210.507	0	0	0	0	0	0	0	0	0
2000047	0701R	Col	R	0	39600	42900	44000	39121.5	52895.7	52800	52250	49500	49500	44000	66000	55000	0.290566	0.355545	0.318393	0.306995	0.300586	0.293176	0.250947	0.245312	0.304898	0.295672	0.271769	0.4429	3453.63	2787.64	3077.06	4333.86	4798.93	5041.87	5643.02	4780.48	3944.57	4628.96	7084.61	5934.19	0	0	0	0	0	0	0	0	0
2000047	0711R	Sandia	R	0	17600	20900	25300	26400	26400	26400	26400	35200	67100	67100	67100	67100	0.202463	0.218627	0.228832	0.24765	0.371897	0.231054	0.401795	0.241638	0.205413	0.272604	0.176353	0.2735	2246.32	2511.29	3064.7	5658.54	5527.47	3983.01	5070.01	5007.14	12623.1	12054.5	12517.7	7216.63	0	0	0	0	0	0	0	0	0
2000047	0712R	Melón	R	0	19105.3	19105.3	22289.5	23350.9	23350.9	23881.6	33294.1	22289.5	24412.3	24412.3	24412.3	24412.3	0.342507	0.28532	0.328674	0.355663	0.421844	0.301493	0.370564	0.258124	0.275395	0.336392	0.26463	0.4248	3336.45	3596.68	3726.42	4717.67	3867.4	4800.02	5875.62	3479.97	3906.85	4030.53	4322.12	5413.77	59.3455	0	0	0	0	32.8045	0	0	0
2000047	0723R	Ajo	R	0	10724.1	8579.28	12868.9	10724.1	11796.5	11796.5	12064.6	12332.7	8579.28	12868.9	11796.5	11796.5	0.988823	1.13443	1.48269	1.35448	1.26403	1.20787	1.69567	1.86626	1.35089	1.17737	0.943399	1.3569	2635.23	1559.6	3062.99	4015.86	3439.56	3001.39	3545.19	4204.91	2610.89	6687.69	5845.99	4302.4	246.377	0	0	0	0	0	0	0	0
2000047	0724R	Cebolla	R	0	49323.6	52611.8	60284.4	55516.4	60284.4	42747.1	41651	42747.1	49323.6	49323.6	49323.6	38362.8	0.18634	0.175012	0.19873	0.251551	0.164084	0.139574	0.248044	0.173705	0.202694	0.263377	0.181481	0.2555	4021.6	3943.07	5254	6883.45	5866.42	3472.33	3609.43	4058.95	5997.59	6236.76	6300.98	5703.62	0	0	0	0	0	0	0	0	0
2000047	0732R	Guisantes verdes	R	0	8709.3	8164.97	8709.3	3048.26	7620.64	7620.64	6046.43	7620.64	7620.64	7620.64	7832.93	6531.98	0.6796	0.661623	0.695398	0.746235	0.73276	0.612003	0.680769	0.598284	0.60325	0.655633	0.615728	0.5243	1028.01	924.015	946.088	320.773	783.355	782.584	620.314	775.709	786.456	783.355	807.167	581.134	0	0	0	0	0	0	0	0	0
2000047	1201R	Manzano	R	10	13505.8	9265.3	13090	17121.5	15812.5	13750	12875.5	12650	13750	13750	6002.7	6002.7	0.3622	0.279909	0.313305	0.388313	0.341306	0.261013	0.296591	0.302519	0.388573	0.418333	0.307462	0.3469	1738.06	1060.52	1270.22	3308.91	3652.3	3153.57	3004.04	2820.69	3591.84	4169.79	2101.54	1496.59	0	0	0	0	0	0	0	0	0
2000047	1202R	Peral	R	0	19360	9999	19250	19800	17424	33000	27896	27500	31240	31108	0	0	0.544509	0.432065	0.4247	0.635142	0.538588	0.477539	0.469161	0.394089	0.459763	0.572388	0.446815	0.5097	2645.05	1301.12	2814.87	6247.45	2890.54	7076.32	5038.66	6454.17	7961.02	7783.08	0	0	0	115.232	0	238.224	0	0	0	0	0
2000047	1218S	Almendro (Secano)	S	1	838.095	628.571	1466.67	1236.19	1257.14	2095.24	2189.52	2095.24	1396.48	1396.48	1745.33	1745.33	1.55314	1.60106	1.02979	0.91113	0.868761	0.617514	0.727415	0.6832	0.903617	1.49862	1.48392	1.8548	758.412	545.353	1221.46	997.31	990.72	1649.57	1722.11	1635.08	1104.88	443.028	738.564	1371.39	0	0	0	0	0	0	0	0	0
2000047	1302R	Vid	R	0	8846.23	6976.69	8284.82	7369.13	5450.54	4360.43	12007.5	9814.24	9810.97	13847.6	10554.4	9643.1	0.476906	0.557499	0.53334	0.563065	0.536381	0.568517	0.618308	0.596894	0.612917	0.619928	0.804649	0.7017	1066.03	701.834	1178.03	206.244	868.269	581.332	1888.9	1996.71	2188.29	3887.9	2434.06	2067.94	0	0	0	0	0	56.1504	32.3418	0	6.49468
2000047	1302S	Vid (Secano)	S	0	5097.88	3687.83	4555.55	3931.88	2928.57	2332.01	7375.66	4661.85	5287.7	6312.7	6724.86	5965.61	0.476906	0.557499	0.53334	0.563065	0.536381	0.568517	0.618308	0.596894	0.612917	0.619928	0.804649	0.7017	1752.95	1589.89	2547.79	2812.52	818.539	766.873	2918.91	1886	2581.14	3047.93	3462.72	3346.12	0	0	0	0	0	0	0	0	0
2000047	1402R	Olivar	R	0	1516.7	541.679	5335.53	4116.76	2708.39	3791.75	6608.48	1950.04	1920.79	3791.75	2987.9	3352.99	2.71019	3.28732	3.45681	2.54235	2.37026	1.95638	1.88335	1.77595	1.90863	2.52672	2.16219	3.19687	531.378	181.952	1720.35	1285.85	826.361	1155.77	2012.35	589.173	588.375	1137.82	956.871	854.78	0	0	0	0	0	0	0	0	0
2000047	1402S	Olivar (Secano)	S	0	1760	880	1870	1650	2860	2860	10901	0	0	6050	0	0	2.71019	3.28732	3.45681	2.54235	2.37026	1.95638	1.88335	1.77595	1.90863	2.52672	2.16219	3.19687	195.394	97.2335	243.548	706.225	446.901	431.505	1400.98	0	0	1882.34	0	0	139.79	210.147	152.583	0	74.0082	79.2558	3.9639	0	6.89745
2000055	0101R	Trigo	R	0	6151.71	6151.71	6041.86	6481.27	6151.71	6041.86	6261.56	6206.64	6151.71	7030.53	6688.89	7030.53	0.162961	0.154143	0.147643	0.215924	0.219547	0.160616	0.174271	0.228528	0.249617	0.214031	0.21084	0.2024	643.264	697.832	1386.76	1441.08	711.583	789.605	884.144	949.243	1244.67	1466.51	1443.53	1634.9	273.003	259.901	0	0	43.3779	51.0002	0	0	0
2000055	0101S	Trigo (Secano)	S	30	2832.57	2430.94	2219.55	3593.56	4016.33	1796.78	3065.1	3012.25	3117.94	3382.17	2219.55	3170.79	0.162961	0.154143	0.147643	0.215924	0.219547	0.160616	0.174271	0.228528	0.249617	0.214031	0.21084	0.2024	300.381	251.748	406.629	512.746	540.645	253.446	356.615	414.19	533.964	622.535	389.761	550.619	166.336	159.51	48.9778	0	40.8705	42.7841	0	0	0
2000055	0102R	Cebada	R	0	6256.31	6314.34	6144.79	6601.1	6599.96	6373.51	6372.37	6315.48	5917.2	6258.58	5917.2	5803.41	0.145456	0.146635	0.133229	0.18851	0.170202	0.124946	0.150448	0.193469	0.224847	0.181234	0.163886	0.174	638.511	583.523	514.083	1354.7	643.023	747.561	899.246	944.33	1171.45	1295.99	1210.58	1361.93	286.109	241.572	57.5417	0	58.1515	65.4687	0	0	0
2000055	0102S	Cebada (Secano)	S	5	2776.57	2665.51	2607.88	3654.59	4377.55	1978.17	2933.73	3248.06	2671.79	3667.17	2305.08	2837.34	0.145456	0.146635	0.133229	0.18851	0.170202	0.124946	0.150448	0.193469	0.224847	0.181234	0.163886	0.174	326.562	296.857	300.178	589.544	666.917	283.997	373.927	489.116	488.888	679.52	417.697	529.083	176.321	154.474	41.8553	0	40.8404	46.9423	0	0	0
2000055	0103R	Avena	R	0.5	3784.05	3941.71	3678.93	4309.61	4519.83	3941.71	3889.16	4046.83	3784.05	3784.05	3573.82	3731.49	0.143959	0.156241	0.135667	0.16243	0.171606	0.12715	0.139837	0.18026	0.218604	0.167795	0.160668	0.1821	629.76	628.948	563.477	639.424	655.082	570.73	562.566	481.139	550.611	548.44	519.251	539.229	0	0	0	0	0	0	0	0	0
2000055	0103S	Avena (Secano)	S	0	2989.24	2693.73	2727.83	3750.76	4205.4	1193.42	2727.83	2727.83	2614.17	2614.17	2045.87	2159.53	0.143959	0.156241	0.135667	0.16243	0.171606	0.12715	0.139837	0.18026	0.218604	0.167795	0.160668	0.1821	730.322	293.708	298.994	816.969	505.322	135.8	369.551	443.469	552.994	563.144	436.304	446.909	0	149.517	19.8624	0	75.4525	50.389	0	0	0
2000055	0104S	Centeno (Secano)	S	0	2051.23	2051.23	1794.82	2487.11	2435.83	1410.22	1923.03	2307.63	1987.13	2307.63	2051.23	3076.84	0.143037	0.144979	0.135667	0.182657	0.160774	0.12204	0.146644	0.182346	0.220718	0.170001	0.152223	0.1638	242.29	262.953	215.921	509.56	429.761	245.919	273.856	400.912	452.312	518.564	486.754	733.781	171.967	153.702	38.824	0	91.4396	62.7433	0	0	0
2000055	0105S	Triticale (Secano)	S	0	2145.25	2621.97	2741.15	3098.69	3813.78	1906.89	3337.05	3337.05	3337.05	2502.79	2502.79	2502.79	0.156166	0.159443	0.147961	0.188715	0.185346	0.154804	0.174972	0.204791	0.22092	0.198886	0.181481	0.1764	419.914	492.064	493.8	540.747	650.118	324.739	567.734	563.301	492.651	298.107	353.574	412.697	0	0	0	0	0	0	0	0	0
2000055	0108R	Maiz	R	0	11622.6	11501.5	11622.6	9927.65	10411.9	11501.5	12349	12591.2	11501.5	12228	11985.8	14407.2	0.16895	0.149064	0.160998	0.209968	0.182538	0.144484	0.18298	0.215418	0.234614	0.199488	0.170622	0.1729	1298.19	1257.4	1436.53	2020.84	1496.78	1617.69	1772.25	2195.88	2683.62	3017.14	2805.33	3628.39	460.553	512.118	117.076	0	115.45	115.838	0	0	0
2000055	0203S	Lentejas (Secano)	S	0	669.613	223.204	781.215	1116.02	1116.02	725.414	892.818	892.818	781.215	1227.62	732.11	558.011	0.5414	0.629713	0.644947	0.594483	0.609698	0.609097	0.718606	0.756694	0.800406	0.551626	0.464812	0.5955	308.451	185.52	326.091	862.545	842.565	547.128	469.838	528.731	528.11	1017.52	661.175	476.985	144.673	0	0	0	0	0	24.8945	99.5551	86.0419
2000055	0204S	Garbanzos (Secano)	S	0	715.766	596.471	1002.07	656.118	1073.65	775.413	954.354	715.766	715.766	1192.94	811.201	775.413	0.636873	0.574725	0.594708	0.649413	0.659244	0.672021	0.628918	0.64824	0.658732	0.667067	0.551682	0.5891	355.234	227.123	393.224	394.802	387.932	272.278	364.419	416.61	384.234	777.968	519.944	490.929	211.377	161.155	0	0	141.407	153.582	0	0	80.4031
2000055	0206S	Veza (Secano)	S	0.3	739.27	211.22	739.27	686.465	1056.1	739.27	739.27	844.88	475.245	844.88	633.66	633.66	0.200506	0.212333	0.194385	0.248677	0.290256	0.255703	0.240136	0.216113	0.265426	0.309312	0.347277	0.388	164.741	52.1219	143.186	120.129	180.533	126.249	153.43	143.017	81.5615	144.427	108.588	108.001	205.665	183.017	0	0	0	0	0	0	0
2000055	0303R	Patata	R	0	51482.1	49991.5	56091.6	52777.4	51526.7	57415.7	50886.9	55994.6	54009.7	52052.4	62845.9	45759.5	0.255555	0.189698	0.283946	0.251141	0.226568	0.150295	0.259555	0.211247	0.248208	0.348929	0.174342	0.2281	3682.28	3865.09	4591.1	6929.76	4799.99	5451.68	4851.98	5703.24	6410.6	6370.28	7459.88	5667.55	0	0	0	0	0	0	0	0	0
2000055	0402R	Remolacha	R	0	90527.7	102647	106311	107762	110042	116472	119526	115802	115441	94276.4	102491	120851	0.0700215	0.0607298	0.0463174	0.0360386	0.0372097	0.0371731	0.0358352	0.0309868	0.034739	0.0341005	0.034587	0.0381	2307.07	2593.89	2738.39	4215.06	3077.99	3172.55	3419.56	3899.7	4617.49	3786.9	3880.3	5008.02	0	6.56986	223.5	0	485.09	1443.1	1288.7	1123.75	982.056
2000055	0409R	Girasol	R	0	2680.19	2447.13	2563.66	2563.66	2575.31	3018.13	3146.31	3379.37	2913.25	3262.84	2330.6	2447.13	0.264769	0.278805	0.234343	0.404844	0.388245	0.225644	0.365759	0.377503	0.503866	0.340705	0.308668	0.364	394.234	406.033	335.366	946.719	496.321	548.927	718.716	862.036	979.014	1204.69	906.169	1104.37	273.084	149.528	65.8937	0	50.0776	57.2425	0	0	0
2000055	0409S	Girasol (Secano)	S	5	720.292	463.045	823.191	823.191	926.089	637.973	823.191	1028.99	617.393	977.539	874.64	823.191	0.264769	0.278805	0.234343	0.404844	0.388245	0.225644	0.365759	0.377503	0.503866	0.340705	0.308668	0.364	131.505	80.5195	152.557	185.062	203.559	123.001	183.585	264.737	201.3	330.67	304.982	314.315	194.114	161.928	71.4688	0	63.5273	43.9063	0.650639	0	0
2000055	0606R	Alfalfa	R	0.2	48229.7	42870.8	48229.7	42870.8	51445	49301.4	49301.4	49301.4	42870.8	69129.2	34296.6	34296.6	0.136358	0.138243	0.117224	0.128445	0.167895	0.145286	0.116414	0.139242	0.167351	0.166491	0.148804	0.1513	560.775	583.05	623.628	734.312	930.657	1540.06	1096.7	835.32	874.497	1743.35	211.367	958.395	0	0	0	0	16.0774	19.829	0	0	0
2000055	0606S	Alfalfa (Secano)	S	3	15286.4	10190.9	20381.8	15286.4	25477.3	9681.36	18343.6	18343.6	10190.9	21910.4	18343.6	9171.81	0.136358	0.138243	0.117224	0.128445	0.167895	0.145286	0.116414	0.139242	0.167351	0.166491	0.148804	0.1513	299.053	191.147	366.963	266.613	236.809	94.5884	242.855	236.111	141.081	390.727	1195.59	170.276	0	0	0	0	107.286	100.508	0	0	0
2000055	0610R	Veza para forraje	R	2.4	26886.5	26886.5	21509.2	26886.5	32263.8	27962	26886.5	26886.5	21509.2	32371.4	18497.9	18820.6	0.12058	0.130403	0.109911	0.112223	0.12557	0.133963	0.0985969	0.103289	0.132008	0.12557	0.152524	0.1272	489.71	469.515	360.549	436.588	511.77	443.097	425.635	422.312	342.53	513.475	294.139	275.803	0	0	0	0	0	0	0	0	0
2000055	0610S	Veza para forraje (Secano)	S	6.8	15746.7	8398.23	14696.9	12597.3	17846.2	8398.23	15746.7	15746.7	7873.34	27084.3	12597.3	12597.3	0.12058	0.130403	0.109911	0.112223	0.12557	0.133963	0.0985969	0.103289	0.132008	0.12557	0.152524	0.1272	415.872	212.652	357.217	296.608	410.461	192.968	284.553	306.641	185.423	667.716	313.351	288.883	0	0	0	0	0	0	0	0	0
2000055	0701R	Col	R	0	47856.4	47856.4	49052.8	48454.6	52043.9	53359.9	52043.9	50249.3	48454.6	47856.4	45463.6	45463.6	0.290566	0.355545	0.318393	0.306995	0.300586	0.293176	0.250947	0.245312	0.304898	0.295672	0.271769	0.4429	4173.7	3109.71	3430.42	5270.49	4721.65	5095.34	5518.89	4852.83	3861.27	5034.67	4880.18	4816.36	0	0	0	0	0	0	0	0	0
2000055	0711R	Sandia	R	0	53333.3	53333.3	53333.3	56000	59333.3	53333.3	54666.7	46666.7	53333.3	50666.7	48000	48000	0.202463	0.218627	0.228832	0.24765	0.371897	0.231054	0.401795	0.241638	0.205413	0.272604	0.176353	0.2735	6807.02	6408.38	6460.5	15769.5	16321.1	8046.48	10498.5	6638.26	10033.3	9102.28	8954.52	5162.42	0	0	0	0	0	0	0	0	0
2000055	0723R	Ajo	R	0	11956.5	12500	12282.6	9918.48	13587	13260.9	31847.8	12500	13043.5	12500	10869.6	13043.5	0.988823	1.13443	1.48269	1.35448	1.26403	1.20787	1.69567	1.86626	1.35089	1.17737	0.943399	1.3569	2938.07	2272.34	2923.44	4333.38	3961.61	3373.96	9358.51	4261.95	3969.46	6495.97	5386.62	5550.27	246.377	0	0	0	0	0	0	0	0
2000055	0724R	Cebolla	R	0	27535.1	29728.1	30451.4	22907.2	26877.8	27061.1	27641.4	27794.1	27757.5	27030.5	26877.8	26352.5	0.18634	0.175012	0.19873	0.251551	0.164084	0.139574	0.248044	0.173705	0.202694	0.263377	0.181481	0.2555	2245.08	2228.02	2653.94	1676.93	2615.55	2198.16	2395.37	2639.12	1992.78	3417.9	3433.58	3917.98	0	0	0	0	0	0	0	0	0
2000055	0732R	Guisantes verdes	R	0	10000	12000	12000	13000	0	0	0	0	0	0	0	0	0.6796	0.661623	0.695398	0.746235	0.73276	0.612003	0.680769	0.598284	0.60325	0.655633	0.615728	0.5243	1730.58	1991.06	1911.21	2005.71	0	0	0	0	0	0	0	0	0	0	0	0	0	0	0	0	0
2000055	1201R	Manzano	R	0	26344.3	25950.8	28064.8	24687.2	8815.59	24296.9	48471.9	44639	24646.6	39259.5	40892.2	46192	0.3622	0.279909	0.313305	0.388313	0.341306	0.261013	0.296591	0.302519	0.388573	0.418333	0.307462	0.3469	3390.24	2970.36	2723.33	12158.2	2036.19	5572.52	11309.2	9953.58	6438.3	11905.8	14316.3	11516.5	0	0	0	0	0	0	0	0	0
2000055	1202R	Peral	R	0	37739.1	35122	36944.2	36044.7	33357.8	40714.8	39259.3	41607.7	35749.3	37035.5	35950.1	35083.8	0.544509	0.432065	0.4247	0.635142	0.538588	0.477539	0.469161	0.394089	0.459763	0.572388	0.446815	0.5097	5156.1	4570.26	5402.24	21049.6	5533.87	8730.63	7091.14	9765.2	9110.14	9266.11	8407.07	7657.34	0	115.232	0	238.224	0	0	0	0	0
2000055	1218S	Almendro (Secano)	S	0	416.667	583.333	1666.67	1666.67	1666.67	1666.67	1666.67	1666.67	1166.67	1250	1250	1250	1.55314	1.60106	1.02979	0.91113	0.868761	0.617514	0.727415	0.6832	0.903617	1.49862	1.48392	1.8548	438.603	588.723	1614.61	1564.1	1527.87	1526.36	1524.86	1512.95	1073.74	396.559	528.956	1142.52	0	0	0	0	0	0	0	0	0
2000055	1302R	Vid	R	0	8246.27	8246.27	8530.45	6850.75	6850.75	7650	7167.91	8087.69	7358.21	6863.43	5328.36	6013.43	0.476906	0.557499	0.53334	0.563065	0.536381	0.568517	0.618308	0.596894	0.612917	0.619928	0.804649	0.7017	993.728	829.55	1212.96	191.736	1091.32	1019.9	1127.58	1645.44	1641.21	1926.99	1228.83	1289.56	0	0	0	0	0	56.1504	32.3418	0	6.49468
2000055	1302S	Vid (Secano)	S	0	3979.14	5435.16	4682.93	3399.16	3405.89	3700.59	3178.47	3902.44	3064.09	2973.93	2644.24	2864.93	0.476906	0.557499	0.53334	0.563065	0.536381	0.568517	0.618308	0.596894	0.612917	0.619928	0.804649	0.7017	1368.26	2343.2	2619.03	1850.84	951.95	1216.93	1257.88	1578.77	1495.71	1435.89	1361.55	1606.94	0	0	0	0	0	0	0	0	0
2000057	0101R	Trigo	R	243	6151.71	6151.71	6041.86	6481.27	6151.71	6041.86	6261.56	6206.64	6151.71	7030.53	6688.89	7030.53	0.162961	0.154143	0.147643	0.215924	0.219547	0.160616	0.174271	0.228528	0.249617	0.214031	0.21084	0.2024	643.264	697.832	1386.76	1441.08	711.583	789.605	884.144	949.243	1244.67	1466.51	1443.53	1634.9	273.003	259.901	0	0	43.3779	51.0002	0	0	0
2000057	0101S	Trigo (Secano)	S	2222	2832.57	2430.94	2219.55	3593.56	4016.33	1796.78	3065.1	3012.25	3117.94	3382.17	2219.55	3170.79	0.162961	0.154143	0.147643	0.215924	0.219547	0.160616	0.174271	0.228528	0.249617	0.214031	0.21084	0.2024	300.381	251.748	406.629	512.746	540.645	253.446	356.615	414.19	533.964	622.535	389.761	550.619	166.336	159.51	48.9778	0	40.8705	42.7841	0	0	0
2000057	0102R	Cebada	R	25	6256.31	6314.34	6144.79	6601.1	6599.96	6373.51	6372.37	6315.48	5917.2	6258.58	5917.2	5803.41	0.145456	0.146635	0.133229	0.18851	0.170202	0.124946	0.150448	0.193469	0.224847	0.181234	0.163886	0.174	638.511	583.523	514.083	1354.7	643.023	747.561	899.246	944.33	1171.45	1295.99	1210.58	1361.93	286.109	241.572	57.5417	0	58.1515	65.4687	0	0	0
2000057	0102S	Cebada (Secano)	S	122	2776.57	2665.51	2607.88	3654.59	4377.55	1978.17	2933.73	3248.06	2671.79	3667.17	2305.08	2837.34	0.145456	0.146635	0.133229	0.18851	0.170202	0.124946	0.150448	0.193469	0.224847	0.181234	0.163886	0.174	326.562	296.857	300.178	589.544	666.917	283.997	373.927	489.116	488.888	679.52	417.697	529.083	176.321	154.474	41.8553	0	40.8404	46.9423	0	0	0
2000057	0103R	Avena	R	43.9	3784.05	3941.71	3678.93	4309.61	4519.83	3941.71	3889.16	4046.83	3784.05	3784.05	3573.82	3731.49	0.143959	0.156241	0.135667	0.16243	0.171606	0.12715	0.139837	0.18026	0.218604	0.167795	0.160668	0.1821	629.76	628.948	563.477	639.424	655.082	570.73	562.566	481.139	550.611	548.44	519.251	539.229	0	0	0	0	0	0	0	0	0
2000057	0103S	Avena (Secano)	S	128.9	2989.24	2693.73	2727.83	3750.76	4205.4	1193.42	2727.83	2727.83	2614.17	2614.17	2045.87	2159.53	0.143959	0.156241	0.135667	0.16243	0.171606	0.12715	0.139837	0.18026	0.218604	0.167795	0.160668	0.1821	730.322	293.708	298.994	816.969	505.322	135.8	369.551	443.469	552.994	563.144	436.304	446.909	0	149.517	19.8624	0	75.4525	50.389	0	0	0
2000057	0104R	Centeno	R	4	2853.96	0	0	3472.32	3389.08	2616.13	2972.88	3329.62	2853.96	3091.79	2972.88	3448.54	0.143037	0.144979	0.135667	0.182657	0.160774	0.12204	0.146644	0.182346	0.220718	0.170001	0.152223	0.1638	600.066	0	0	650.884	620.565	478.561	543.057	603.727	524.65	566.129	545.7	629.59	0	0	0	0	0	0	0	0	0
2000057	0104S	Centeno (Secano)	S	38.7	2051.23	2051.23	1794.82	2487.11	2435.83	1410.22	1923.03	2307.63	1987.13	2307.63	2051.23	3076.84	0.143037	0.144979	0.135667	0.182657	0.160774	0.12204	0.146644	0.182346	0.220718	0.170001	0.152223	0.1638	242.29	262.953	215.921	509.56	429.761	245.919	273.856	400.912	452.312	518.564	486.754	733.781	171.967	153.702	38.824	0	91.4396	62.7433	0	0	0
2000057	0105S	Triticale (Secano)	S	23.4	2145.25	2621.97	2741.15	3098.69	3813.78	1906.89	3337.05	3337.05	3337.05	2502.79	2502.79	2502.79	0.156166	0.159443	0.147961	0.188715	0.185346	0.154804	0.174972	0.204791	0.22092	0.198886	0.181481	0.1764	419.914	492.064	493.8	540.747	650.118	324.739	567.734	563.301	492.651	298.107	353.574	412.697	0	0	0	0	0	0	0	0	0
2000057	0108R	Maiz	R	318	11622.6	11501.5	11622.6	9927.65	10411.9	11501.5	12349	12591.2	11501.5	12228	11985.8	14407.2	0.16895	0.149064	0.160998	0.209968	0.182538	0.144484	0.18298	0.215418	0.234614	0.199488	0.170622	0.1729	1298.19	1257.4	1436.53	2020.84	1496.78	1617.69	1772.25	2195.88	2683.62	3017.14	2805.33	3628.39	460.553	512.118	117.076	0	115.45	115.838	0	0	0
2000008	0201R	Judia seca	R	6.8	3516.88	3321.49	3256.37	2474.84	3647.13	3256.37	3256.37	3126.11	3126.11	2605.09	2058.02	3256.37	1.41529	1.6142	1.74618	2.10225	1.98927	2.09261	1.78085	1.84491	1.90309	2.48914	2.3679	1.7635	643.563	341.078	350.799	624.164	510.386	492.309	493.05	797.315	688.266	1035.83	992.309	856.274	0	0	0	0	0	0	0	0	0
2000057	0203S	Lentejas (Secano)	S	3.3	669.613	223.204	781.215	1116.02	1116.02	725.414	892.818	892.818	781.215	1227.62	732.11	558.011	0.5414	0.629713	0.644947	0.594483	0.609698	0.609097	0.718606	0.756694	0.800406	0.551626	0.464812	0.5955	308.451	185.52	326.091	862.545	842.565	547.128	469.838	528.731	528.11	1017.52	661.175	476.985	144.673	0	0	0	0	0	24.8945	99.5551	86.0419
2000057	0204S	Garbanzos (Secano)	S	6.2	715.766	596.471	1002.07	656.118	1073.65	775.413	954.354	715.766	715.766	1192.94	811.201	775.413	0.636873	0.574725	0.594708	0.649413	0.659244	0.672021	0.628918	0.64824	0.658732	0.667067	0.551682	0.5891	355.234	227.123	393.224	394.802	387.932	272.278	364.419	416.61	384.234	777.968	519.944	490.929	211.377	161.155	0	0	141.407	153.582	0	0	80.4031
2000057	0205R	Guisante seco	R	8	2061.41	1832.37	2175.93	2175.93	2175.93	2175.93	2061.41	2061.41	1946.89	2061.41	1717.84	1775.1	0.183	0.168498	0.164072	0.226191	0.218243	0.187869	0.2031	0.222072	0.268346	0.260067	0.255984	0.2289	329.353	308.063	356.519	451.392	440.936	379.593	519	413.652	396.083	417.729	348.967	358.65	354.829	263.037	125.174	0	0	167.83	55.1042	0	0
2000057	0205S	Guisantes secos (Secano)	S	0	908.211	681.158	794.684	749.274	1248.79	794.684	1021.74	1021.74	510.869	1135.26	624.395	681.158	0.183	0.168498	0.164072	0.226191	0.218243	0.187869	0.2031	0.222072	0.268346	0.260067	0.255984	0.2289	225.526	153.354	172.833	182.277	319.367	170.641	236.442	241.894	154.007	377.006	199.016	223.487	245.306	186.54	95.1786	0	118.359	112.431	50.6398	54.7533	0
2000057	0206R	Veza	R	24.7	1728.03	1728.03	1728.03	1749.63	1944.03	1836.03	1728.03	1728.03	1728.03	1620.03	1080.02	1134.02	0.200506	0.212333	0.194385	0.248677	0.290256	0.255703	0.240136	0.216113	0.265426	0.309312	0.347277	0.388	402.031	345.223	369.994	362.9	393.882	371.633	349.429	346.7	351.503	328.235	219.364	229.087	0	293.733	0	0	0	0	0	0	0
2000057	0206S	Veza (Secano)	S	46.6	739.27	211.22	739.27	686.465	1056.1	739.27	739.27	844.88	475.245	844.88	633.66	633.66	0.200506	0.212333	0.194385	0.248677	0.290256	0.255703	0.240136	0.216113	0.265426	0.309312	0.347277	0.388	164.741	52.1219	143.186	120.129	180.533	126.249	153.43	143.017	81.5615	144.427	108.588	108.001	205.665	183.017	0	0	0	0	0	0	0
2000057	0303R	Patata	R	0	51482.1	49991.5	56091.6	52777.4	51526.7	57415.7	50886.9	55994.6	54009.7	52052.4	62845.9	45759.5	0.255555	0.189698	0.283946	0.251141	0.226568	0.150295	0.259555	0.211247	0.248208	0.348929	0.174342	0.2281	3682.28	3865.09	4591.1	6929.76	4799.99	5451.68	4851.98	5703.24	6410.6	6370.28	7459.88	5667.55	0	0	0	0	0	0	0	0	0
2000057	0402R	Remolacha	R	21	90527.7	102647	106311	107762	110042	116472	119526	115802	115441	94276.4	102491	120851	0.0700215	0.0607298	0.0463174	0.0360386	0.0372097	0.0371731	0.0358352	0.0309868	0.034739	0.0341005	0.034587	0.0381	2307.07	2593.89	2738.39	4215.06	3077.99	3172.55	3419.56	3899.7	4617.49	3786.9	3880.3	5008.02	0	6.56986	223.5	0	485.09	1443.1	1288.7	1123.75	982.056
2000057	0409R	Girasol	R	34	2680.19	2447.13	2563.66	2563.66	2575.31	3018.13	3146.31	3379.37	2913.25	3262.84	2330.6	2447.13	0.264769	0.278805	0.234343	0.404844	0.388245	0.225644	0.365759	0.377503	0.503866	0.340705	0.308668	0.364	394.234	406.033	335.366	946.719	496.321	548.927	718.716	862.036	979.014	1204.69	906.169	1104.37	273.084	149.528	65.8937	0	50.0776	57.2425	0	0	0
2000057	0409S	Girasol (Secano)	S	17	720.292	463.045	823.191	823.191	926.089	637.973	823.191	1028.99	617.393	977.539	874.64	823.191	0.264769	0.278805	0.234343	0.404844	0.388245	0.225644	0.365759	0.377503	0.503866	0.340705	0.308668	0.364	131.505	80.5195	152.557	185.062	203.559	123.001	183.585	264.737	201.3	330.67	304.982	314.315	194.114	161.928	71.4688	0	63.5273	43.9063	0.650639	0	0
2000057	0421R	Colza	R	18	0	2176.66	4353.31	4190.06	4353.31	3047.32	3482.65	2938.49	3264.98	3482.65	3591.48	3373.82	0	0	0	0	0	0	0	0	0	0.336994	0.327772	0	0	1117.62	2145.6	2000.54	2030.34	1419.84	1621.07	1357.1	1528.78	1392.49	1422.43	1337.5	0	0	0	0	0	0	0	0	0
2000057	0602R	Maíz forrajero	R	30.8	91154.8	88875.9	91154.8	71047.2	91154.8	96851.9	85457.6	85457.6	85457.6	68366.1	68366.1	74063.2	0.0413174	0.0364542	0.0393728	0.0513487	0.0446405	0.0353342	0.0447485	0.0526814	0.0573758	0.0487857	0.0478587	0.0318	3842.49	3591.94	3536.29	2670.01	3346.32	3551.96	3131	3106.55	3149.59	2149.59	1580.78	2169.59	0	0	0	0	0	0	0	0	0
2000057	0606R	Alfalfa	R	121	48229.7	42870.8	48229.7	42870.8	51445	49301.4	49301.4	49301.4	42870.8	69129.2	34296.6	34296.6	0.136358	0.138243	0.117224	0.128445	0.167895	0.145286	0.116414	0.139242	0.167351	0.166491	0.148804	0.1513	560.775	583.05	623.628	734.312	930.657	1540.06	1096.7	835.32	874.497	1743.35	211.367	958.395	0	0	0	0	16.0774	19.829	0	0	0
2000057	0606S	Alfalfa (Secano)	S	173	15286.4	10190.9	20381.8	15286.4	25477.3	9681.36	18343.6	18343.6	10190.9	21910.4	18343.6	9171.81	0.136358	0.138243	0.117224	0.128445	0.167895	0.145286	0.116414	0.139242	0.167351	0.166491	0.148804	0.1513	299.053	191.147	366.963	266.613	236.809	94.5884	242.855	236.111	141.081	390.727	1195.59	170.276	0	0	0	0	107.286	100.508	0	0	0
2000057	0610R	Veza para forraje	R	33.3	26886.5	26886.5	21509.2	26886.5	32263.8	27962	26886.5	26886.5	21509.2	32371.4	18497.9	18820.6	0.12058	0.130403	0.109911	0.112223	0.12557	0.133963	0.0985969	0.103289	0.132008	0.12557	0.152524	0.1272	489.71	469.515	360.549	436.588	511.77	443.097	425.635	422.312	342.53	513.475	294.139	275.803	0	0	0	0	0	0	0	0	0
2000057	0610S	Veza para forraje (Secano)	S	141.2	15746.7	8398.23	14696.9	12597.3	17846.2	8398.23	15746.7	15746.7	7873.34	27084.3	12597.3	12597.3	0.12058	0.130403	0.109911	0.112223	0.12557	0.133963	0.0985969	0.103289	0.132008	0.12557	0.152524	0.1272	415.872	212.652	357.217	296.608	410.461	192.968	284.553	306.641	185.423	667.716	313.351	288.883	0	0	0	0	0	0	0	0	0
2000057	0701R	Col	R	1	47856.4	47856.4	49052.8	48454.6	52043.9	53359.9	52043.9	50249.3	48454.6	47856.4	45463.6	45463.6	0.290566	0.355545	0.318393	0.306995	0.300586	0.293176	0.250947	0.245312	0.304898	0.295672	0.271769	0.4429	4173.7	3109.71	3430.42	5270.49	4721.65	5095.34	5518.89	4852.83	3861.27	5034.67	4880.18	4816.36	0	0	0	0	0	0	0	0	0
2000057	0711R	Sandia	R	0	53333.3	53333.3	53333.3	56000	59333.3	53333.3	54666.7	46666.7	53333.3	50666.7	48000	48000	0.202463	0.218627	0.228832	0.24765	0.371897	0.231054	0.401795	0.241638	0.205413	0.272604	0.176353	0.2735	6807.02	6408.38	6460.5	15769.5	16321.1	8046.48	10498.5	6638.26	10033.3	9102.28	8954.52	5162.42	0	0	0	0	0	0	0	0	0
2000057	0723R	Ajo	R	0	11956.5	12500	12282.6	9918.48	13587	13260.9	31847.8	12500	13043.5	12500	10869.6	13043.5	0.988823	1.13443	1.48269	1.35448	1.26403	1.20787	1.69567	1.86626	1.35089	1.17737	0.943399	1.3569	2938.07	2272.34	2923.44	4333.38	3961.61	3373.96	9358.51	4261.95	3969.46	6495.97	5386.62	5550.27	246.377	0	0	0	0	0	0	0	0
2000057	0724R	Cebolla	R	0	27535.1	29728.1	30451.4	22907.2	26877.8	27061.1	27641.4	27794.1	27757.5	27030.5	26877.8	26352.5	0.18634	0.175012	0.19873	0.251551	0.164084	0.139574	0.248044	0.173705	0.202694	0.263377	0.181481	0.2555	2245.08	2228.02	2653.94	1676.93	2615.55	2198.16	2395.37	2639.12	1992.78	3417.9	3433.58	3917.98	0	0	0	0	0	0	0	0	0
2000057	0732R	Guisantes verdes	R	0	10000	12000	12000	13000	0	0	0	0	0	0	0	0	0.6796	0.661623	0.695398	0.746235	0.73276	0.612003	0.680769	0.598284	0.60325	0.655633	0.615728	0.5243	1730.58	1991.06	1911.21	2005.71	0	0	0	0	0	0	0	0	0	0	0	0	0	0	0	0	0
2000057	1201R	Manzano	R	0	26344.3	25950.8	28064.8	24687.2	8815.59	24296.9	48471.9	44639	24646.6	39259.5	40892.2	46192	0.3622	0.279909	0.313305	0.388313	0.341306	0.261013	0.296591	0.302519	0.388573	0.418333	0.307462	0.3469	3390.24	2970.36	2723.33	12158.2	2036.19	5572.52	11309.2	9953.58	6438.3	11905.8	14316.3	11516.5	0	0	0	0	0	0	0	0	0
2000057	1202R	Peral	R	0	37739.1	35122	36944.2	36044.7	33357.8	40714.8	39259.3	41607.7	35749.3	37035.5	35950.1	35083.8	0.544509	0.432065	0.4247	0.635142	0.538588	0.477539	0.469161	0.394089	0.459763	0.572388	0.446815	0.5097	5156.1	4570.26	5402.24	21049.6	5533.87	8730.63	7091.14	9765.2	9110.14	9266.11	8407.07	7657.34	0	115.232	0	238.224	0	0	0	0	0
2000057	1218S	Almendro (Secano)	S	1	416.667	583.333	1666.67	1666.67	1666.67	1666.67	1666.67	1666.67	1166.67	1250	1250	1250	1.55314	1.60106	1.02979	0.91113	0.868761	0.617514	0.727415	0.6832	0.903617	1.49862	1.48392	1.8548	438.603	588.723	1614.61	1564.1	1527.87	1526.36	1524.86	1512.95	1073.74	396.559	528.956	1142.52	0	0	0	0	0	0	0	0	0
2000057	1302R	Vid	R	0	8246.27	8246.27	8530.45	6850.75	6850.75	7650	7167.91	8087.69	7358.21	6863.43	5328.36	6013.43	0.476906	0.557499	0.53334	0.563065	0.536381	0.568517	0.618308	0.596894	0.612917	0.619928	0.804649	0.7017	993.728	829.55	1212.96	191.736	1091.32	1019.9	1127.58	1645.44	1641.21	1926.99	1228.83	1289.56	0	0	0	0	0	56.1504	32.3418	0	6.49468
2000057	1302S	Vid (Secano)	S	6	3979.14	5435.16	4682.93	3399.16	3405.89	3700.59	3178.47	3902.44	3064.09	2973.93	2644.24	2864.93	0.476906	0.557499	0.53334	0.563065	0.536381	0.568517	0.618308	0.596894	0.612917	0.619928	0.804649	0.7017	1368.26	2343.2	2619.03	1850.84	951.95	1216.93	1257.88	1578.77	1495.71	1435.89	1361.55	1606.94	0	0	0	0	0	0	0	0	0
2000280	0101R	Trigo	R	151	6151.71	6151.71	6041.86	6481.27	6151.71	6041.86	6261.56	6206.64	6151.71	7030.53	6688.89	7030.53	0.162961	0.154143	0.147643	0.215924	0.219547	0.160616	0.174271	0.228528	0.249617	0.214031	0.21084	0.2024	643.264	697.832	1386.76	1441.08	711.583	789.605	884.144	949.243	1244.67	1466.51	1443.53	1634.9	273.003	259.901	0	0	43.3779	51.0002	0	0	0
2000280	0101S	Trigo (Secano)	S	2723	2832.57	2430.94	2219.55	3593.56	4016.33	1796.78	3065.1	3012.25	3117.94	3382.17	2219.55	3170.79	0.162961	0.154143	0.147643	0.215924	0.219547	0.160616	0.174271	0.228528	0.249617	0.214031	0.21084	0.2024	300.381	251.748	406.629	512.746	540.645	253.446	356.615	414.19	533.964	622.535	389.761	550.619	166.336	159.51	48.9778	0	40.8705	42.7841	0	0	0
2000280	0102R	Cebada	R	48	6256.31	6314.34	6144.79	6601.1	6599.96	6373.51	6372.37	6315.48	5917.2	6258.58	5917.2	5803.41	0.145456	0.146635	0.133229	0.18851	0.170202	0.124946	0.150448	0.193469	0.224847	0.181234	0.163886	0.174	638.511	583.523	514.083	1354.7	643.023	747.561	899.246	944.33	1171.45	1295.99	1210.58	1361.93	286.109	241.572	57.5417	0	58.1515	65.4687	0	0	0
2000280	0102S	Cebada (Secano)	S	292	2776.57	2665.51	2607.88	3654.59	4377.55	1978.17	2933.73	3248.06	2671.79	3667.17	2305.08	2837.34	0.145456	0.146635	0.133229	0.18851	0.170202	0.124946	0.150448	0.193469	0.224847	0.181234	0.163886	0.174	326.562	296.857	300.178	589.544	666.917	283.997	373.927	489.116	488.888	679.52	417.697	529.083	176.321	154.474	41.8553	0	40.8404	46.9423	0	0	0
2000280	0103R	Avena	R	35	3784.05	3941.71	3678.93	4309.61	4519.83	3941.71	3889.16	4046.83	3784.05	3784.05	3573.82	3731.49	0.143959	0.156241	0.135667	0.16243	0.171606	0.12715	0.139837	0.18026	0.218604	0.167795	0.160668	0.1821	629.76	628.948	563.477	639.424	655.082	570.73	562.566	481.139	550.611	548.44	519.251	539.229	0	0	0	0	0	0	0	0	0
2000280	0103S	Avena (Secano)	S	70	2989.24	2693.73	2727.83	3750.76	4205.4	1193.42	2727.83	2727.83	2614.17	2614.17	2045.87	2159.53	0.143959	0.156241	0.135667	0.16243	0.171606	0.12715	0.139837	0.18026	0.218604	0.167795	0.160668	0.1821	730.322	293.708	298.994	816.969	505.322	135.8	369.551	443.469	552.994	563.144	436.304	446.909	0	149.517	19.8624	0	75.4525	50.389	0	0	0
2000280	0104R	Centeno	R	12	2853.96	0	0	3472.32	3389.08	2616.13	2972.88	3329.62	2853.96	3091.79	2972.88	3448.54	0.143037	0.144979	0.135667	0.182657	0.160774	0.12204	0.146644	0.182346	0.220718	0.170001	0.152223	0.1638	600.066	0	0	650.884	620.565	478.561	543.057	603.727	524.65	566.129	545.7	629.59	0	0	0	0	0	0	0	0	0
2000280	0104S	Centeno (Secano)	S	52	2051.23	2051.23	1794.82	2487.11	2435.83	1410.22	1923.03	2307.63	1987.13	2307.63	2051.23	3076.84	0.143037	0.144979	0.135667	0.182657	0.160774	0.12204	0.146644	0.182346	0.220718	0.170001	0.152223	0.1638	242.29	262.953	215.921	509.56	429.761	245.919	273.856	400.912	452.312	518.564	486.754	733.781	171.967	153.702	38.824	0	91.4396	62.7433	0	0	0
2000280	0105S	Triticale (Secano)	S	44	2145.25	2621.97	2741.15	3098.69	3813.78	1906.89	3337.05	3337.05	3337.05	2502.79	2502.79	2502.79	0.156166	0.159443	0.147961	0.188715	0.185346	0.154804	0.174972	0.204791	0.22092	0.198886	0.181481	0.1764	419.914	492.064	493.8	540.747	650.118	324.739	567.734	563.301	492.651	298.107	353.574	412.697	0	0	0	0	0	0	0	0	0
2000280	0108R	Maiz	R	588	11622.6	11501.5	11622.6	9927.65	10411.9	11501.5	12349	12591.2	11501.5	12228	11985.8	14407.2	0.16895	0.149064	0.160998	0.209968	0.182538	0.144484	0.18298	0.215418	0.234614	0.199488	0.170622	0.1729	1298.19	1257.4	1436.53	2020.84	1496.78	1617.69	1772.25	2195.88	2683.62	3017.14	2805.33	3628.39	460.553	512.118	117.076	0	115.45	115.838	0	0	0
2000280	0203S	Lentejas (Secano)	S	20	669.613	223.204	781.215	1116.02	1116.02	725.414	892.818	892.818	781.215	1227.62	732.11	558.011	0.5414	0.629713	0.644947	0.594483	0.609698	0.609097	0.718606	0.756694	0.800406	0.551626	0.464812	0.5955	308.451	185.52	326.091	862.545	842.565	547.128	469.838	528.731	528.11	1017.52	661.175	476.985	144.673	0	0	0	0	0	24.8945	99.5551	86.0419
2000280	0204S	Garbanzos (Secano)	S	70	715.766	596.471	1002.07	656.118	1073.65	775.413	954.354	715.766	715.766	1192.94	811.201	775.413	0.636873	0.574725	0.594708	0.649413	0.659244	0.672021	0.628918	0.64824	0.658732	0.667067	0.551682	0.5891	355.234	227.123	393.224	394.802	387.932	272.278	364.419	416.61	384.234	777.968	519.944	490.929	211.377	161.155	0	0	141.407	153.582	0	0	80.4031
2000280	0205S	Guisantes secos (Secano)	S	3	908.211	681.158	794.684	749.274	1248.79	794.684	1021.74	1021.74	510.869	1135.26	624.395	681.158	0.183	0.168498	0.164072	0.226191	0.218243	0.187869	0.2031	0.222072	0.268346	0.260067	0.255984	0.2289	225.526	153.354	172.833	182.277	319.367	170.641	236.442	241.894	154.007	377.006	199.016	223.487	245.306	186.54	95.1786	0	118.359	112.431	50.6398	54.7533	0
2000280	0206S	Veza (Secano)	S	98	739.27	211.22	739.27	686.465	1056.1	739.27	739.27	844.88	475.245	844.88	633.66	633.66	0.200506	0.212333	0.194385	0.248677	0.290256	0.255703	0.240136	0.216113	0.265426	0.309312	0.347277	0.388	164.741	52.1219	143.186	120.129	180.533	126.249	153.43	143.017	81.5615	144.427	108.588	108.001	205.665	183.017	0	0	0	0	0	0	0
2000280	0303R	Patata	R	3	51482.1	49991.5	56091.6	52777.4	51526.7	57415.7	50886.9	55994.6	54009.7	52052.4	62845.9	45759.5	0.255555	0.189698	0.283946	0.251141	0.226568	0.150295	0.259555	0.211247	0.248208	0.348929	0.174342	0.2281	3682.28	3865.09	4591.1	6929.76	4799.99	5451.68	4851.98	5703.24	6410.6	6370.28	7459.88	5667.55	0	0	0	0	0	0	0	0	0
2000280	0402R	Remolacha	R	27	90527.7	102647	106311	107762	110042	116472	119526	115802	115441	94276.4	102491	120851	0.0700215	0.0607298	0.0463174	0.0360386	0.0372097	0.0371731	0.0358352	0.0309868	0.034739	0.0341005	0.034587	0.0381	2307.07	2593.89	2738.39	4215.06	3077.99	3172.55	3419.56	3899.7	4617.49	3786.9	3880.3	5008.02	0	6.56986	223.5	0	485.09	1443.1	1288.7	1123.75	982.056
2000280	0409R	Girasol	R	88	2680.19	2447.13	2563.66	2563.66	2575.31	3018.13	3146.31	3379.37	2913.25	3262.84	2330.6	2447.13	0.264769	0.278805	0.234343	0.404844	0.388245	0.225644	0.365759	0.377503	0.503866	0.340705	0.308668	0.364	394.234	406.033	335.366	946.719	496.321	548.927	718.716	862.036	979.014	1204.69	906.169	1104.37	273.084	149.528	65.8937	0	50.0776	57.2425	0	0	0
2000280	0409S	Girasol (Secano)	S	744	720.292	463.045	823.191	823.191	926.089	637.973	823.191	1028.99	617.393	977.539	874.64	823.191	0.264769	0.278805	0.234343	0.404844	0.388245	0.225644	0.365759	0.377503	0.503866	0.340705	0.308668	0.364	131.505	80.5195	152.557	185.062	203.559	123.001	183.585	264.737	201.3	330.67	304.982	314.315	194.114	161.928	71.4688	0	63.5273	43.9063	0.650639	0	0
2000280	0421S	Colza (Secano)	S	162	1224.8	0	2449.59	2878.27	2939.51	918.597	3429.43	2204.63	1592.23	2572.07	2327.11	1837.19	0	0	0	0	0	0	0	0.333804	0.444357	0.445012	0.496283	0.4763	729.869	0	1343.42	1529.13	1525.5	476.248	1776.24	1132.95	829.581	1071.94	876.471	704.316	0	0	0	0	0	0	0	0	0
2000280	0602R	Maíz forrajero	R	91	91154.8	88875.9	91154.8	71047.2	91154.8	96851.9	85457.6	85457.6	85457.6	68366.1	68366.1	74063.2	0.0413174	0.0364542	0.0393728	0.0513487	0.0446405	0.0353342	0.0447485	0.0526814	0.0573758	0.0487857	0.0478587	0.0318	3842.49	3591.94	3536.29	2670.01	3346.32	3551.96	3131	3106.55	3149.59	2149.59	1580.78	2169.59	0	0	0	0	0	0	0	0	0
2000280	0606R	Alfalfa	R	359	48229.7	42870.8	48229.7	42870.8	51445	49301.4	49301.4	49301.4	42870.8	69129.2	34296.6	34296.6	0.136358	0.138243	0.117224	0.128445	0.167895	0.145286	0.116414	0.139242	0.167351	0.166491	0.148804	0.1513	560.775	583.05	623.628	734.312	930.657	1540.06	1096.7	835.32	874.497	1743.35	211.367	958.395	0	0	0	0	16.0774	19.829	0	0	0
2000280	0606S	Alfalfa (Secano)	S	477	15286.4	10190.9	20381.8	15286.4	25477.3	9681.36	18343.6	18343.6	10190.9	21910.4	18343.6	9171.81	0.136358	0.138243	0.117224	0.128445	0.167895	0.145286	0.116414	0.139242	0.167351	0.166491	0.148804	0.1513	299.053	191.147	366.963	266.613	236.809	94.5884	242.855	236.111	141.081	390.727	1195.59	170.276	0	0	0	0	107.286	100.508	0	0	0
2000280	0610R	Veza para forraje	R	148	26886.5	26886.5	21509.2	26886.5	32263.8	27962	26886.5	26886.5	21509.2	32371.4	18497.9	18820.6	0.12058	0.130403	0.109911	0.112223	0.12557	0.133963	0.0985969	0.103289	0.132008	0.12557	0.152524	0.1272	489.71	469.515	360.549	436.588	511.77	443.097	425.635	422.312	342.53	513.475	294.139	275.803	0	0	0	0	0	0	0	0	0
2000280	0610S	Veza para forraje (Secano)	S	99	15746.7	8398.23	14696.9	12597.3	17846.2	8398.23	15746.7	15746.7	7873.34	27084.3	12597.3	12597.3	0.12058	0.130403	0.109911	0.112223	0.12557	0.133963	0.0985969	0.103289	0.132008	0.12557	0.152524	0.1272	415.872	212.652	357.217	296.608	410.461	192.968	284.553	306.641	185.423	667.716	313.351	288.883	0	0	0	0	0	0	0	0	0
2000280	0701R	Col	R	0	47856.4	47856.4	49052.8	48454.6	52043.9	53359.9	52043.9	50249.3	48454.6	47856.4	45463.6	45463.6	0.290566	0.355545	0.318393	0.306995	0.300586	0.293176	0.250947	0.245312	0.304898	0.295672	0.271769	0.4429	4173.7	3109.71	3430.42	5270.49	4721.65	5095.34	5518.89	4852.83	3861.27	5034.67	4880.18	4816.36	0	0	0	0	0	0	0	0	0
2000280	0711R	Sandia	R	0	53333.3	53333.3	53333.3	56000	59333.3	53333.3	54666.7	46666.7	53333.3	50666.7	48000	48000	0.202463	0.218627	0.228832	0.24765	0.371897	0.231054	0.401795	0.241638	0.205413	0.272604	0.176353	0.2735	6807.02	6408.38	6460.5	15769.5	16321.1	8046.48	10498.5	6638.26	10033.3	9102.28	8954.52	5162.42	0	0	0	0	0	0	0	0	0
2000280	0723R	Ajo	R	0	11956.5	12500	12282.6	9918.48	13587	13260.9	31847.8	12500	13043.5	12500	10869.6	13043.5	0.988823	1.13443	1.48269	1.35448	1.26403	1.20787	1.69567	1.86626	1.35089	1.17737	0.943399	1.3569	2938.07	2272.34	2923.44	4333.38	3961.61	3373.96	9358.51	4261.95	3969.46	6495.97	5386.62	5550.27	246.377	0	0	0	0	0	0	0	0
2000280	0724R	Cebolla	R	0	27535.1	29728.1	30451.4	22907.2	26877.8	27061.1	27641.4	27794.1	27757.5	27030.5	26877.8	26352.5	0.18634	0.175012	0.19873	0.251551	0.164084	0.139574	0.248044	0.173705	0.202694	0.263377	0.181481	0.2555	2245.08	2228.02	2653.94	1676.93	2615.55	2198.16	2395.37	2639.12	1992.78	3417.9	3433.58	3917.98	0	0	0	0	0	0	0	0	0
2000280	0732R	Guisantes verdes	R	4	10000	12000	12000	13000	0	0	0	0	0	0	0	0	0.6796	0.661623	0.695398	0.746235	0.73276	0.612003	0.680769	0.598284	0.60325	0.655633	0.615728	0.5243	1730.58	1991.06	1911.21	2005.71	0	0	0	0	0	0	0	0	0	0	0	0	0	0	0	0	0
2000280	1201R	Manzano	R	0	26344.3	25950.8	28064.8	24687.2	8815.59	24296.9	48471.9	44639	24646.6	39259.5	40892.2	46192	0.3622	0.279909	0.313305	0.388313	0.341306	0.261013	0.296591	0.302519	0.388573	0.418333	0.307462	0.3469	3390.24	2970.36	2723.33	12158.2	2036.19	5572.52	11309.2	9953.58	6438.3	11905.8	14316.3	11516.5	0	0	0	0	0	0	0	0	0
2000280	1202R	Peral	R	0	37739.1	35122	36944.2	36044.7	33357.8	40714.8	39259.3	41607.7	35749.3	37035.5	35950.1	35083.8	0.544509	0.432065	0.4247	0.635142	0.538588	0.477539	0.469161	0.394089	0.459763	0.572388	0.446815	0.5097	5156.1	4570.26	5402.24	21049.6	5533.87	8730.63	7091.14	9765.2	9110.14	9266.11	8407.07	7657.34	0	115.232	0	238.224	0	0	0	0	0
2000280	1218S	Almendro (Secano)	S	18	416.667	583.333	1666.67	1666.67	1666.67	1666.67	1666.67	1666.67	1166.67	1250	1250	1250	1.55314	1.60106	1.02979	0.91113	0.868761	0.617514	0.727415	0.6832	0.903617	1.49862	1.48392	1.8548	438.603	588.723	1614.61	1564.1	1527.87	1526.36	1524.86	1512.95	1073.74	396.559	528.956	1142.52	0	0	0	0	0	0	0	0	0
2000280	1302R	Vid	R	0	8246.27	8246.27	8530.45	6850.75	6850.75	7650	7167.91	8087.69	7358.21	6863.43	5328.36	6013.43	0.476906	0.557499	0.53334	0.563065	0.536381	0.568517	0.618308	0.596894	0.612917	0.619928	0.804649	0.7017	993.728	829.55	1212.96	191.736	1091.32	1019.9	1127.58	1645.44	1641.21	1926.99	1228.83	1289.56	0	0	0	0	0	56.1504	32.3418	0	6.49468
2000280	1302S	Vid (Secano)	S	100	3979.14	5435.16	4682.93	3399.16	3405.89	3700.59	3178.47	3902.44	3064.09	2973.93	2644.24	2864.93	0.476906	0.557499	0.53334	0.563065	0.536381	0.568517	0.618308	0.596894	0.612917	0.619928	0.804649	0.7017	1368.26	2343.2	2619.03	1850.84	951.95	1216.93	1257.88	1578.77	1495.71	1435.89	1361.55	1606.94	0	0	0	0	0	0	0	0	0
2000306	0101R	Trigo	R	109	6151.71	6151.71	6041.86	6481.27	6151.71	6041.86	6261.56	6206.64	6151.71	7030.53	6688.89	7030.53	0.162961	0.154143	0.147643	0.215924	0.219547	0.160616	0.174271	0.228528	0.249617	0.214031	0.21084	0.2024	643.264	697.832	1386.76	1441.08	711.583	789.605	884.144	949.243	1244.67	1466.51	1443.53	1634.9	273.003	259.901	0	0	43.3779	51.0002	0	0	0
2000306	0101S	Trigo (Secano)	S	22	2832.57	2430.94	2219.55	3593.56	4016.33	1796.78	3065.1	3012.25	3117.94	3382.17	2219.55	3170.79	0.162961	0.154143	0.147643	0.215924	0.219547	0.160616	0.174271	0.228528	0.249617	0.214031	0.21084	0.2024	300.381	251.748	406.629	512.746	540.645	253.446	356.615	414.19	533.964	622.535	389.761	550.619	166.336	159.51	48.9778	0	40.8705	42.7841	0	0	0
2000306	0102R	Cebada	R	2	6256.31	6314.34	6144.79	6601.1	6599.96	6373.51	6372.37	6315.48	5917.2	6258.58	5917.2	5803.41	0.145456	0.146635	0.133229	0.18851	0.170202	0.124946	0.150448	0.193469	0.224847	0.181234	0.163886	0.174	638.511	583.523	514.083	1354.7	643.023	747.561	899.246	944.33	1171.45	1295.99	1210.58	1361.93	286.109	241.572	57.5417	0	58.1515	65.4687	0	0	0
2000306	0102S	Cebada (Secano)	S	75	2776.57	2665.51	2607.88	3654.59	4377.55	1978.17	2933.73	3248.06	2671.79	3667.17	2305.08	2837.34	0.145456	0.146635	0.133229	0.18851	0.170202	0.124946	0.150448	0.193469	0.224847	0.181234	0.163886	0.174	326.562	296.857	300.178	589.544	666.917	283.997	373.927	489.116	488.888	679.52	417.697	529.083	176.321	154.474	41.8553	0	40.8404	46.9423	0	0	0
2000306	0103R	Avena	R	0	3784.05	3941.71	3678.93	4309.61	4519.83	3941.71	3889.16	4046.83	3784.05	3784.05	3573.82	3731.49	0.143959	0.156241	0.135667	0.16243	0.171606	0.12715	0.139837	0.18026	0.218604	0.167795	0.160668	0.1821	629.76	628.948	563.477	639.424	655.082	570.73	562.566	481.139	550.611	548.44	519.251	539.229	0	0	0	0	0	0	0	0	0
2000306	0103S	Avena (Secano)	S	0	2989.24	2693.73	2727.83	3750.76	4205.4	1193.42	2727.83	2727.83	2614.17	2614.17	2045.87	2159.53	0.143959	0.156241	0.135667	0.16243	0.171606	0.12715	0.139837	0.18026	0.218604	0.167795	0.160668	0.1821	730.322	293.708	298.994	816.969	505.322	135.8	369.551	443.469	552.994	563.144	436.304	446.909	0	149.517	19.8624	0	75.4525	50.389	0	0	0
2000306	0104S	Centeno (Secano)	S	2	2051.23	2051.23	1794.82	2487.11	2435.83	1410.22	1923.03	2307.63	1987.13	2307.63	2051.23	3076.84	0.143037	0.144979	0.135667	0.182657	0.160774	0.12204	0.146644	0.182346	0.220718	0.170001	0.152223	0.1638	242.29	262.953	215.921	509.56	429.761	245.919	273.856	400.912	452.312	518.564	486.754	733.781	171.967	153.702	38.824	0	91.4396	62.7433	0	0	0
2000306	0105S	Triticale (Secano)	S	2	2145.25	2621.97	2741.15	3098.69	3813.78	1906.89	3337.05	3337.05	3337.05	2502.79	2502.79	2502.79	0.156166	0.159443	0.147961	0.188715	0.185346	0.154804	0.174972	0.204791	0.22092	0.198886	0.181481	0.1764	419.914	492.064	493.8	540.747	650.118	324.739	567.734	563.301	492.651	298.107	353.574	412.697	0	0	0	0	0	0	0	0	0
2000306	0108R	Maiz	R	0	11622.6	11501.5	11622.6	9927.65	10411.9	11501.5	12349	12591.2	11501.5	12228	11985.8	14407.2	0.16895	0.149064	0.160998	0.209968	0.182538	0.144484	0.18298	0.215418	0.234614	0.199488	0.170622	0.1729	1298.19	1257.4	1436.53	2020.84	1496.78	1617.69	1772.25	2195.88	2683.62	3017.14	2805.33	3628.39	460.553	512.118	117.076	0	115.45	115.838	0	0	0
2000306	0203S	Lentejas (Secano)	S	0	669.613	223.204	781.215	1116.02	1116.02	725.414	892.818	892.818	781.215	1227.62	732.11	558.011	0.5414	0.629713	0.644947	0.594483	0.609698	0.609097	0.718606	0.756694	0.800406	0.551626	0.464812	0.5955	308.451	185.52	326.091	862.545	842.565	547.128	469.838	528.731	528.11	1017.52	661.175	476.985	144.673	0	0	0	0	0	24.8945	99.5551	86.0419
2000306	0204S	Garbanzos (Secano)	S	0	715.766	596.471	1002.07	656.118	1073.65	775.413	954.354	715.766	715.766	1192.94	811.201	775.413	0.636873	0.574725	0.594708	0.649413	0.659244	0.672021	0.628918	0.64824	0.658732	0.667067	0.551682	0.5891	355.234	227.123	393.224	394.802	387.932	272.278	364.419	416.61	384.234	777.968	519.944	490.929	211.377	161.155	0	0	141.407	153.582	0	0	80.4031
2000306	0205S	Guisantes secos (Secano)	S	0	908.211	681.158	794.684	749.274	1248.79	794.684	1021.74	1021.74	510.869	1135.26	624.395	681.158	0.183	0.168498	0.164072	0.226191	0.218243	0.187869	0.2031	0.222072	0.268346	0.260067	0.255984	0.2289	225.526	153.354	172.833	182.277	319.367	170.641	236.442	241.894	154.007	377.006	199.016	223.487	245.306	186.54	95.1786	0	118.359	112.431	50.6398	54.7533	0
2000306	0303R	Patata	R	0	51482.1	49991.5	56091.6	52777.4	51526.7	57415.7	50886.9	55994.6	54009.7	52052.4	62845.9	45759.5	0.255555	0.189698	0.283946	0.251141	0.226568	0.150295	0.259555	0.211247	0.248208	0.348929	0.174342	0.2281	3682.28	3865.09	4591.1	6929.76	4799.99	5451.68	4851.98	5703.24	6410.6	6370.28	7459.88	5667.55	0	0	0	0	0	0	0	0	0
2000306	0402R	Remolacha	R	0	90527.7	102647	106311	107762	110042	116472	119526	115802	115441	94276.4	102491	120851	0.0700215	0.0607298	0.0463174	0.0360386	0.0372097	0.0371731	0.0358352	0.0309868	0.034739	0.0341005	0.034587	0.0381	2307.07	2593.89	2738.39	4215.06	3077.99	3172.55	3419.56	3899.7	4617.49	3786.9	3880.3	5008.02	0	6.56986	223.5	0	485.09	1443.1	1288.7	1123.75	982.056
2000306	0409R	Girasol	R	5	2680.19	2447.13	2563.66	2563.66	2575.31	3018.13	3146.31	3379.37	2913.25	3262.84	2330.6	2447.13	0.264769	0.278805	0.234343	0.404844	0.388245	0.225644	0.365759	0.377503	0.503866	0.340705	0.308668	0.364	394.234	406.033	335.366	946.719	496.321	548.927	718.716	862.036	979.014	1204.69	906.169	1104.37	273.084	149.528	65.8937	0	50.0776	57.2425	0	0	0
2000306	0409S	Girasol (Secano)	S	21	720.292	463.045	823.191	823.191	926.089	637.973	823.191	1028.99	617.393	977.539	874.64	823.191	0.264769	0.278805	0.234343	0.404844	0.388245	0.225644	0.365759	0.377503	0.503866	0.340705	0.308668	0.364	131.505	80.5195	152.557	185.062	203.559	123.001	183.585	264.737	201.3	330.67	304.982	314.315	194.114	161.928	71.4688	0	63.5273	43.9063	0.650639	0	0
2000306	0602R	Maíz forrajero	R	2	91154.8	88875.9	91154.8	71047.2	91154.8	96851.9	85457.6	85457.6	85457.6	68366.1	68366.1	74063.2	0.0413174	0.0364542	0.0393728	0.0513487	0.0446405	0.0353342	0.0447485	0.0526814	0.0573758	0.0487857	0.0478587	0.0318	3842.49	3591.94	3536.29	2670.01	3346.32	3551.96	3131	3106.55	3149.59	2149.59	1580.78	2169.59	0	0	0	0	0	0	0	0	0
2000306	0606R	Alfalfa	R	39	48229.7	42870.8	48229.7	42870.8	51445	49301.4	49301.4	49301.4	42870.8	69129.2	34296.6	34296.6	0.136358	0.138243	0.117224	0.128445	0.167895	0.145286	0.116414	0.139242	0.167351	0.166491	0.148804	0.1513	560.775	583.05	623.628	734.312	930.657	1540.06	1096.7	835.32	874.497	1743.35	211.367	958.395	0	0	0	0	16.0774	19.829	0	0	0
2000306	0606S	Alfalfa (Secano)	S	5	15286.4	10190.9	20381.8	15286.4	25477.3	9681.36	18343.6	18343.6	10190.9	21910.4	18343.6	9171.81	0.136358	0.138243	0.117224	0.128445	0.167895	0.145286	0.116414	0.139242	0.167351	0.166491	0.148804	0.1513	299.053	191.147	366.963	266.613	236.809	94.5884	242.855	236.111	141.081	390.727	1195.59	170.276	0	0	0	0	107.286	100.508	0	0	0
2000306	0610S	Veza para forraje (Secano)	S	5	15746.7	8398.23	14696.9	12597.3	17846.2	8398.23	15746.7	15746.7	7873.34	27084.3	12597.3	12597.3	0.12058	0.130403	0.109911	0.112223	0.12557	0.133963	0.0985969	0.103289	0.132008	0.12557	0.152524	0.1272	415.872	212.652	357.217	296.608	410.461	192.968	284.553	306.641	185.423	667.716	313.351	288.883	0	0	0	0	0	0	0	0	0
2000306	0701R	Col	R	0	47856.4	47856.4	49052.8	48454.6	52043.9	53359.9	52043.9	50249.3	48454.6	47856.4	45463.6	45463.6	0.290566	0.355545	0.318393	0.306995	0.300586	0.293176	0.250947	0.245312	0.304898	0.295672	0.271769	0.4429	4173.7	3109.71	3430.42	5270.49	4721.65	5095.34	5518.89	4852.83	3861.27	5034.67	4880.18	4816.36	0	0	0	0	0	0	0	0	0
2000306	0711R	Sandia	R	0	53333.3	53333.3	53333.3	56000	59333.3	53333.3	54666.7	46666.7	53333.3	50666.7	48000	48000	0.202463	0.218627	0.228832	0.24765	0.371897	0.231054	0.401795	0.241638	0.205413	0.272604	0.176353	0.2735	6807.02	6408.38	6460.5	15769.5	16321.1	8046.48	10498.5	6638.26	10033.3	9102.28	8954.52	5162.42	0	0	0	0	0	0	0	0	0
2000306	0723R	Ajo	R	0	11956.5	12500	12282.6	9918.48	13587	13260.9	31847.8	12500	13043.5	12500	10869.6	13043.5	0.988823	1.13443	1.48269	1.35448	1.26403	1.20787	1.69567	1.86626	1.35089	1.17737	0.943399	1.3569	2938.07	2272.34	2923.44	4333.38	3961.61	3373.96	9358.51	4261.95	3969.46	6495.97	5386.62	5550.27	246.377	0	0	0	0	0	0	0	0
2000306	0724R	Cebolla	R	0	27535.1	29728.1	30451.4	22907.2	26877.8	27061.1	27641.4	27794.1	27757.5	27030.5	26877.8	26352.5	0.18634	0.175012	0.19873	0.251551	0.164084	0.139574	0.248044	0.173705	0.202694	0.263377	0.181481	0.2555	2245.08	2228.02	2653.94	1676.93	2615.55	2198.16	2395.37	2639.12	1992.78	3417.9	3433.58	3917.98	0	0	0	0	0	0	0	0	0
2000306	0732R	Guisantes verdes	R	0	10000	12000	12000	13000	0	0	0	0	0	0	0	0	0.6796	0.661623	0.695398	0.746235	0.73276	0.612003	0.680769	0.598284	0.60325	0.655633	0.615728	0.5243	1730.58	1991.06	1911.21	2005.71	0	0	0	0	0	0	0	0	0	0	0	0	0	0	0	0	0
2000306	1201R	Manzano	R	0	26344.3	25950.8	28064.8	24687.2	8815.59	24296.9	48471.9	44639	24646.6	39259.5	40892.2	46192	0.3622	0.279909	0.313305	0.388313	0.341306	0.261013	0.296591	0.302519	0.388573	0.418333	0.307462	0.3469	3390.24	2970.36	2723.33	12158.2	2036.19	5572.52	11309.2	9953.58	6438.3	11905.8	14316.3	11516.5	0	0	0	0	0	0	0	0	0
2000306	1202R	Peral	R	0	37739.1	35122	36944.2	36044.7	33357.8	40714.8	39259.3	41607.7	35749.3	37035.5	35950.1	35083.8	0.544509	0.432065	0.4247	0.635142	0.538588	0.477539	0.469161	0.394089	0.459763	0.572388	0.446815	0.5097	5156.1	4570.26	5402.24	21049.6	5533.87	8730.63	7091.14	9765.2	9110.14	9266.11	8407.07	7657.34	0	115.232	0	238.224	0	0	0	0	0
2000306	1218S	Almendro (Secano)	S	0	416.667	583.333	1666.67	1666.67	1666.67	1666.67	1666.67	1666.67	1166.67	1250	1250	1250	1.55314	1.60106	1.02979	0.91113	0.868761	0.617514	0.727415	0.6832	0.903617	1.49862	1.48392	1.8548	438.603	588.723	1614.61	1564.1	1527.87	1526.36	1524.86	1512.95	1073.74	396.559	528.956	1142.52	0	0	0	0	0	0	0	0	0
2000306	1302R	Vid	R	0	8246.27	8246.27	8530.45	6850.75	6850.75	7650	7167.91	8087.69	7358.21	6863.43	5328.36	6013.43	0.476906	0.557499	0.53334	0.563065	0.536381	0.568517	0.618308	0.596894	0.612917	0.619928	0.804649	0.7017	993.728	829.55	1212.96	191.736	1091.32	1019.9	1127.58	1645.44	1641.21	1926.99	1228.83	1289.56	0	0	0	0	0	56.1504	32.3418	0	6.49468
2000306	1302S	Vid (Secano)	S	0	3979.14	5435.16	4682.93	3399.16	3405.89	3700.59	3178.47	3902.44	3064.09	2973.93	2644.24	2864.93	0.476906	0.557499	0.53334	0.563065	0.536381	0.568517	0.618308	0.596894	0.612917	0.619928	0.804649	0.7017	1368.26	2343.2	2619.03	1850.84	951.95	1216.93	1257.88	1578.77	1495.71	1435.89	1361.55	1606.94	0	0	0	0	0	0	0	0	0
2000335	0101R	Trigo	R	70	4613.78	4613.78	4531.39	4860.95	4613.78	4531.39	4696.17	4654.98	4613.78	5272.89	5016.66	5272.89	0.162961	0.154143	0.147643	0.215924	0.219547	0.160616	0.174271	0.228528	0.249617	0.214031	0.21084	0.2024	482.448	523.374	780.052	810.608	533.687	592.204	663.108	711.933	933.504	1099.88	1082.64	1226.17	273.003	259.901	0	0	43.3779	51.0002	0	0	0
2000335	0101S	Trigo (Secano)	S	0	2124.43	1823.2	1664.66	2695.17	3012.25	1347.59	2298.82	2259.19	2338.46	2536.63	1664.66	2378.09	0.162961	0.154143	0.147643	0.215924	0.219547	0.160616	0.174271	0.228528	0.249617	0.214031	0.21084	0.2024	225.286	188.811	304.972	288.419	405.484	190.085	267.461	310.643	400.473	466.901	292.321	412.964	166.336	159.51	48.9778	0	40.8705	42.7841	0	0	0
2000335	0102R	Cebada	R	2	4692.23	4735.75	4608.59	4950.82	4949.97	4780.13	4779.28	4736.61	4437.9	4693.94	4437.9	4352.56	0.145456	0.146635	0.133229	0.18851	0.170202	0.124946	0.150448	0.193469	0.224847	0.181234	0.163886	0.174	478.883	437.642	385.562	762.018	482.267	560.671	674.435	708.247	878.589	971.994	907.933	1021.45	286.109	241.572	57.5417	0	58.1515	65.4687	0	0	0
2000335	0102S	Cebada (Secano)	S	0	2082.43	1999.13	1955.91	2740.94	3283.16	1483.63	2200.3	2436.05	2003.84	2750.37	1728.81	2128	0.145456	0.146635	0.133229	0.18851	0.170202	0.124946	0.150448	0.193469	0.224847	0.181234	0.163886	0.174	244.922	222.643	225.134	331.619	500.188	212.997	280.445	366.837	366.666	509.64	313.273	396.813	176.321	154.474	41.8553	0	40.8404	46.9423	0	0	0
2000335	0103R	Avena	R	3	2838.03	2956.29	2759.2	3232.21	3389.87	2956.29	2916.87	3035.12	2838.03	2838.03	2680.37	2798.62	0.143959	0.156241	0.135667	0.16243	0.171606	0.12715	0.139837	0.18026	0.218604	0.167795	0.160668	0.1821	354.24	353.783	316.956	359.676	368.483	321.035	316.443	360.854	309.719	308.498	292.079	303.316	0	0	0	0	0	0	0	0	0
2000335	0103S	Avena (Secano)	S	10	2241.93	2020.3	2045.87	2813.07	3154.05	895.068	2045.87	2045.87	1960.63	1960.63	1534.4	1619.65	0.143959	0.156241	0.135667	0.16243	0.171606	0.12715	0.139837	0.18026	0.218604	0.167795	0.160668	0.1821	410.806	220.281	224.246	459.545	378.991	101.85	277.163	332.601	414.745	422.358	327.228	335.182	0	149.517	19.8624	0	75.4525	50.389	0	0	0
2000335	0104R	Centeno	R	5	2140.47	0	0	2604.24	2541.81	1962.1	2229.66	2497.22	2140.47	2318.84	2229.66	2586.4	0.143037	0.144979	0.135667	0.182657	0.160774	0.12204	0.146644	0.182346	0.220718	0.170001	0.152223	0.1638	337.537	0	0	366.122	349.068	269.191	407.293	339.596	295.115	318.448	306.956	354.145	0	0	0	0	0	0	0	0	0
2000335	0104S	Centeno (Secano)	S	10	1538.42	1538.42	1346.12	1865.34	1826.88	1057.66	1442.27	1730.72	1490.35	1730.72	1538.42	2307.63	0.143037	0.144979	0.135667	0.182657	0.160774	0.12204	0.146644	0.182346	0.220718	0.170001	0.152223	0.1638	181.717	197.215	161.941	286.627	322.321	184.439	205.392	300.684	339.234	388.923	365.066	550.336	171.967	153.702	38.824	0	91.4396	62.7433	0	0	0
2000335	0105S	Triticale (Secano)	S	3	1608.94	1966.48	2055.86	2324.02	2860.33	1430.17	2502.79	2502.79	2502.79	1877.09	1877.09	1877.09	0.156166	0.159443	0.147961	0.188715	0.185346	0.154804	0.174972	0.204791	0.22092	0.198886	0.181481	0.1764	236.202	276.786	277.762	304.17	365.691	182.666	319.35	316.857	369.488	223.58	265.18	309.523	0	0	0	0	0	0	0	0	0
2000335	0108R	Maiz	R	586	8716.96	8626.16	8716.96	7445.74	7808.94	8626.16	9261.77	9443.37	8626.16	9170.97	8989.36	10805.4	0.16895	0.149064	0.160998	0.209968	0.182538	0.144484	0.18298	0.215418	0.234614	0.199488	0.170622	0.1729	973.64	943.054	1077.4	1136.72	1122.59	1213.27	1329.19	1646.91	2012.72	2262.85	2104	2721.29	460.553	512.118	117.076	0	115.45	115.838	0	0	0
2000335	0203S	Lentejas (Secano)	S	2	502.21	167.403	585.912	837.017	837.017	544.061	669.613	669.613	585.912	920.718	549.083	418.508	0.5414	0.629713	0.644947	0.594483	0.609698	0.609097	0.718606	0.756694	0.800406	0.551626	0.464812	0.5955	231.338	104.355	244.568	485.182	473.943	307.759	352.379	396.548	396.083	763.137	495.882	357.739	144.673	0	0	0	0	0	24.8945	99.5551	86.0419
2000335	0204S	Garbanzos (Secano)	S	3	536.824	447.353	751.554	492.089	805.236	581.559	715.766	536.824	536.824	894.707	608.401	581.559	0.636873	0.574725	0.594708	0.649413	0.659244	0.672021	0.628918	0.64824	0.658732	0.667067	0.551682	0.5891	266.425	170.342	294.918	222.076	290.949	204.209	273.314	234.343	288.176	583.476	389.958	368.197	211.377	161.155	0	0	141.407	153.582	0	0	80.4031
2000335	0205S	Guisantes secos (Secano)	S	0	681.158	510.869	596.013	561.955	936.592	596.013	766.303	766.303	383.151	851.448	468.296	510.869	0.183	0.168498	0.164072	0.226191	0.218243	0.187869	0.2031	0.222072	0.268346	0.260067	0.255984	0.2289	169.145	115.016	129.625	102.531	239.525	127.981	177.331	181.42	115.505	282.754	149.262	167.615	245.306	186.54	95.1786	0	118.359	112.431	50.6398	54.7533	0
2000335	0303R	Patata	R	1	38611.6	37493.6	42068.7	39583	38645	43061.8	38165.2	41995.9	40507.3	39039.3	47134.4	34319.6	0.255555	0.189698	0.283946	0.251141	0.226568	0.150295	0.259555	0.211247	0.248208	0.348929	0.174342	0.2281	2761.71	2898.82	3443.32	3897.99	3599.99	4088.76	3638.98	4277.43	4807.95	4777.71	5594.91	4250.66	0	0	0	0	0	0	0	0	0
2000335	0402R	Remolacha	R	10	67895.8	76985.4	79733.4	80821.8	82531.1	87353.8	89644.5	86851.4	86581	70707.3	76868.5	90638.1	0.0700215	0.0607298	0.0463174	0.0360386	0.0372097	0.0371731	0.0358352	0.0309868	0.034739	0.0341005	0.034587	0.0381	1730.3	1945.42	2053.8	2370.97	2308.49	2379.41	2564.67	2924.77	3463.12	2840.18	2910.22	3756.02	0	6.56986	223.5	0	485.09	1443.1	1288.7	1123.75	982.056
2000335	0409R	Girasol	R	6	2010.14	1835.35	1922.74	1922.74	1931.48	2263.59	2359.73	2534.53	2184.94	2447.13	1747.95	1835.35	0.264769	0.278805	0.234343	0.404844	0.388245	0.225644	0.365759	0.377503	0.503866	0.340705	0.308668	0.364	295.676	304.525	251.525	532.529	372.241	411.695	539.037	646.527	734.261	903.514	679.627	828.277	273.084	149.528	65.8937	0	50.0776	57.2425	0	0	0
2000335	0409S	Girasol (Secano)	S	0	540.219	347.284	617.393	617.393	694.567	478.48	617.393	771.741	463.045	733.154	655.98	617.393	0.264769	0.278805	0.234343	0.404844	0.388245	0.225644	0.365759	0.377503	0.503866	0.340705	0.308668	0.364	98.6291	60.3896	114.418	104.098	152.669	92.2509	137.689	198.553	150.975	248.002	228.736	235.737	194.114	161.928	71.4688	0	63.5273	43.9063	0.650639	0	0
2000335	0606R	Alfalfa	R	218	36172.2	32153.1	36172.2	32153.1	38583.7	36976.1	36976.1	36976.1	32153.1	51846.9	25722.5	25722.5	0.136358	0.138243	0.117224	0.128445	0.167895	0.145286	0.116414	0.139242	0.167351	0.166491	0.148804	0.1513	420.581	437.288	467.721	413.05	697.993	1155.05	822.523	626.49	655.873	1307.51	158.526	718.796	0	0	0	0	16.0774	19.829	0	0	0
2000335	0606S	Alfalfa (Secano)	S	3	11464.8	7643.18	15286.4	11464.8	19107.9	7261.02	13757.7	13757.7	7643.18	16432.8	13757.7	6878.86	0.136358	0.138243	0.117224	0.128445	0.167895	0.145286	0.116414	0.139242	0.167351	0.166491	0.148804	0.1513	168.217	107.52	206.416	149.97	177.607	70.9413	182.141	177.083	105.81	293.045	896.691	127.707	0	0	0	0	107.286	100.508	0	0	0
2000335	0701R	Col	R	0	35892.3	35892.3	36789.6	36341	39032.9	40019.9	39032.9	37686.9	36341	35892.3	34097.7	34097.7	0.290566	0.355545	0.318393	0.306995	0.300586	0.293176	0.250947	0.245312	0.304898	0.295672	0.271769	0.4429	3130.27	2332.28	2572.82	2964.65	3541.24	3821.51	3104.38	3639.63	2895.95	3776	3660.14	2709.2	0	0	0	0	0	0	0	0	0
2000335	0711R	Sandia	R	0	40000	40000	40000	42000	44500	40000	41000	35000	40000	38000	36000	36000	0.202463	0.218627	0.228832	0.24765	0.371897	0.231054	0.401795	0.241638	0.205413	0.272604	0.176353	0.2735	5105.26	4806.29	4845.38	8870.33	9180.63	6034.86	7873.88	4978.69	7524.95	6826.71	6715.89	3871.81	0	0	0	0	0	0	0	0	0
2000335	0723R	Ajo	R	0	8967.39	9375	9211.96	7438.86	10190.2	9945.65	23885.9	9375	9782.61	9375	8152.17	9782.61	0.988823	1.13443	1.48269	1.35448	1.26403	1.20787	1.69567	1.86626	1.35089	1.17737	0.943399	1.3569	2203.55	1704.26	2192.58	2437.52	2971.21	2530.47	7018.88	3196.46	2977.09	4871.98	4039.97	3122.03	246.377	0	0	0	0	0	0	0	0
2000335	0724R	Cebolla	R	0	20651.3	22296.1	22838.5	17180.4	20158.4	20295.8	20731.1	20845.6	20818.1	20272.9	20158.4	19764.4	0.18634	0.175012	0.19873	0.251551	0.164084	0.139574	0.248044	0.173705	0.202694	0.263377	0.181481	0.2555	1683.81	1671.01	1990.46	943.275	1961.66	1648.62	1796.53	1979.34	1120.94	2563.42	2575.19	2938.48	0	0	0	0	0	0	0	0	0
2000335	0732R	Guisantes verdes	R	4	7500	9000	9000	9750	0	0	0	0	0	0	0	0	0.6796	0.661623	0.695398	0.746235	0.73276	0.612003	0.680769	0.598284	0.60325	0.655633	0.615728	0.5243	973.45	1119.97	1075.05	1128.21	0	0	0	0	0	0	0	0	0	0	0	0	0	0	0	0	0
2000335	1201R	Manzano	R	2	19758.2	19463.1	21048.6	18515.4	6611.69	18222.7	36353.9	33479.2	18484.9	29444.7	30669.2	34644	0.3622	0.279909	0.313305	0.388313	0.341306	0.261013	0.296591	0.302519	0.388573	0.418333	0.307462	0.3469	2542.68	2227.77	2042.5	6839	1527.14	4179.39	8481.89	7465.18	4828.72	8929.31	10737.3	8637.41	0	0	0	0	0	0	0	0	0
2000335	1202R	Peral	R	0	28304.4	26341.5	27708.2	27033.5	25018.4	30536.1	29444.5	31205.7	26812	27776.6	26962.6	26312.8	0.544509	0.432065	0.4247	0.635142	0.538588	0.477539	0.469161	0.394089	0.459763	0.572388	0.446815	0.5097	3867.07	3427.69	4051.68	11840.4	4150.4	6547.97	5318.35	7323.9	6832.61	6949.58	6305.31	5743	0	115.232	0	238.224	0	0	0	0	0
2000335	1218S	Almendro (Secano)	S	44	312.5	437.5	1250	1250	1250	1250	1250	1250	875	937.5	937.5	937.5	1.55314	1.60106	1.02979	0.91113	0.868761	0.617514	0.727415	0.6832	0.903617	1.49862	1.48392	1.8548	246.714	331.156	908.216	879.806	859.426	858.58	857.735	851.037	603.979	297.419	396.717	642.669	0	0	0	0	0	0	0	0	0
2000335	1302R	Vid	R	0	6184.7	6184.7	6397.84	5138.06	5138.06	5737.5	5375.93	6065.76	5518.66	5147.57	3996.27	4510.07	0.476906	0.557499	0.53334	0.563065	0.536381	0.568517	0.618308	0.596894	0.612917	0.619928	0.804649	0.7017	745.296	622.162	909.718	143.802	818.491	764.923	845.684	1234.08	1230.91	1445.25	921.619	967.173	0	0	0	0	0	56.1504	32.3418	0	6.49468
2000335	1302S	Vid (Secano)	S	0	2984.36	4076.37	3512.2	2549.37	2554.42	2775.44	2383.85	2926.83	2298.07	2230.45	1983.18	2148.7	0.476906	0.557499	0.53334	0.563065	0.536381	0.568517	0.618308	0.596894	0.612917	0.619928	0.804649	0.7017	1026.2	1757.4	1964.27	1041.1	713.962	912.694	943.406	1184.08	1121.78	1076.92	1021.17	1205.21	0	0	0	0	0	0	0	0	0
2000199	0101R	Trigo	R	1	2819.68	1516.85	2281.84	3456.25	3521.15	2136.85	2471.71	3140.72	2787.23	2898.39	1920.06	2720.26	0.162961	0.154143	0.147643	0.215924	0.219547	0.160616	0.174271	0.228528	0.249617	0.214031	0.21084	0.2024	294.845	172.068	220.198	323.096	407.299	279.263	349.009	480.343	563.938	604.581	414.368	632.576	273.003	259.901	0	0	43.3779	51.0002	0	0	0
2000199	0101S	Trigo (Secano)	S	98	2455.36	1093.7	1674.87	2948.18	3000.75	1438.32	2011.45	2597.73	1870.54	2478.72	1728.9	1890.98	0.162961	0.154143	0.147643	0.215924	0.219547	0.160616	0.174271	0.228528	0.249617	0.214031	0.21084	0.2024	260.38	113.264	306.842	317.881	403.936	202.883	234.026	357.193	320.34	456.242	303.601	328.376	166.336	159.51	48.9778	0	40.8705	42.7841	0	0	0
2000199	0102R	Cebada	R	0	2781.36	1560.65	1652.26	3138.95	3257.01	1906.71	2035.63	2438.69	1948.78	2278.55	1696.36	2293.48	0.145456	0.146635	0.133229	0.18851	0.170202	0.124946	0.150448	0.193469	0.224847	0.181234	0.163886	0.174	283.862	144.224	138.231	248.915	317.326	223.642	287.261	364.648	385.808	471.83	347.052	538.228	286.109	241.572	57.5417	0	58.1515	65.4687	0	0	0
2000199	0102S	Cebada (Secano)	S	2	2237.74	1172.68	1427.91	2704.75	2931.69	1034.72	1765.91	1832.83	1659.68	1857.66	1295.46	1765.91	0.145456	0.146635	0.133229	0.18851	0.170202	0.124946	0.150448	0.193469	0.224847	0.181234	0.163886	0.174	263.189	130.601	164.358	276.57	446.642	148.549	225.08	276	303.691	344.221	234.748	329.293	176.321	154.474	41.8553	0	40.8404	46.9423	0	0	0
2000199	0103R	Avena	R	3	2477.06	1486.24	1733.94	2741.28	3633.03	1948.62	2155.05	2039.45	1843.76	1998.99	1568.81	1886.7	0.143959	0.156241	0.135667	0.16243	0.171606	0.12715	0.139837	0.18026	0.218604	0.167795	0.160668	0.1821	241.915	139.163	155.846	238.678	308.993	165.569	182.928	242.476	157.434	170.016	133.758	159.992	0	0	0	0	0	0	0	0	0
2000199	0103S	Avena (Secano)	S	70	2118.34	1186.27	1440.47	2499.64	2508.12	949.017	1885.32	1847.19	1620.11	2001.41	1304.9	1494.7	0.143959	0.156241	0.135667	0.16243	0.171606	0.12715	0.139837	0.18026	0.218604	0.167795	0.160668	0.1821	336.41	129.344	157.889	353.903	301.376	107.989	255.413	300.302	342.713	431.144	278.284	309.325	0	149.517	19.8624	0	75.4525	50.389	0	0	0
2000199	0104S	Centeno (Secano)	S	15	1255.2	627.6	1063.23	1447.17	1668.68	871.256	1277.35	1642.1	1275.13	1665.72	988.654	1182.1	0.143037	0.144979	0.135667	0.182657	0.160774	0.12204	0.146644	0.182346	0.220718	0.170001	0.152223	0.1638	148.263	80.454	127.908	169.05	294.41	151.932	181.906	285.287	290.248	374.316	234.606	281.914	171.967	153.702	38.824	0	91.4396	62.7433	0	0	0
2000199	0105S	Triticale (Secano)	S	50	2474.22	1237.11	1723.12	2430.04	2606.77	1360.82	2341.67	2385.86	1834.46	2375.25	1852.13	1855.67	0.156166	0.159443	0.147961	0.188715	0.185346	0.154804	0.174972	0.204791	0.22092	0.198886	0.181481	0.1764	374.396	179.479	239.962	327.823	343.518	179.152	307.977	311.338	270.822	282.916	261.654	305.99	0	0	0	0	0	0	0	0	0
2000199	0108R	Maiz	R	0	7180.61	6565.13	7419.96	6838.67	6496.74	7727.7	8411.57	8890.27	8777.44	7522.54	8377.37	8377.37	0.16895	0.149064	0.160998	0.209968	0.182538	0.144484	0.18298	0.215418	0.234614	0.199488	0.170622	0.1729	802.037	717.731	917.091	928.68	933.948	1086.9	1207.18	1550.45	2048.02	1856.12	1960.76	2109.8	460.553	512.118	117.076	0	115.45	115.838	0	0	0
2000199	0203S	Lentejas (Secano)	S	0	633.333	170	416.667	580	444	300	240	480	266.667	540	449.333	240	0.5414	0.629713	0.644947	0.594483	0.609698	0.609097	0.718606	0.756694	0.800406	0.551626	0.464812	0.5955	291.739	78.2589	173.923	248.276	185.657	125.32	126.298	284.258	180.27	447.579	405.797	205.151	144.673	0	0	0	0	0	24.8945	99.5551	86.0419
2000199	0204S	Garbanzos (Secano)	S	0	552.618	221.047	511.172	483.541	621.695	435.187	656.234	566.433	483.541	497.356	565.743	400.648	0.636873	0.574725	0.594708	0.649413	0.659244	0.672021	0.628918	0.64824	0.658732	0.667067	0.551682	0.5891	274.264	84.1699	200.589	170.147	224.632	152.811	250.582	192.797	259.572	324.347	362.616	253.658	211.377	161.155	0	0	141.407	153.582	0	0	80.4031
2000199	0205S	Guisantes secos (Secano)	S	0	740.944	250.679	428.89	576.783	665.519	480.653	561.994	791.228	635.94	680.308	632.982	739.466	0.183	0.168498	0.164072	0.226191	0.218243	0.187869	0.2031	0.222072	0.268346	0.260067	0.255984	0.2289	183.991	56.4372	93.2778	104.088	170.201	103.21	130.052	187.321	191.711	225.921	201.753	242.617	245.306	186.54	95.1786	0	118.359	112.431	50.6398	54.7533	0
2000199	0303R	Patata	R	0	24977.3	26529.9	24782.2	24623.5	23756.8	30377.8	27002.4	27002.4	29176.8	28217.6	29365.2	30025.4	0.255555	0.189698	0.283946	0.251141	0.226568	0.150295	0.259555	0.211247	0.248208	0.348929	0.174342	0.2281	1786.51	2051.16	2028.42	1676.01	2213.07	2884.4	2574.64	2750.29	3463.1	3453.32	3485.68	3718.79	0	0	0	0	0	0	0	0	0
2000199	0402R	Remolacha	R	0	54741.2	55012.2	50076.1	55445.6	54674.1	59034.6	57692.9	67647.6	60932.5	52351.6	65749.1	64784.5	0.0700215	0.0607298	0.0463174	0.0360386	0.0372097	0.0371731	0.0358352	0.0309868	0.034739	0.0341005	0.034587	0.0381	1395.06	1390.16	1289.87	1173.59	1529.3	1608.03	1650.55	2278.07	2437.21	2102.86	2489.24	2684.65	0	6.56986	223.5	0	485.09	1443.1	1288.7	1123.75	982.056
2000199	0409R	Girasol	R	0	1009.8	807.84	807.84	801.108	740.52	565.488	1009.8	1077.12	942.48	942.48	1279.08	1110.78	0.264769	0.278805	0.234343	0.404844	0.388245	0.225644	0.365759	0.377503	0.503866	0.340705	0.308668	0.364	148.533	134.039	105.678	105.104	142.715	102.849	230.67	274.76	316.726	347.976	497.324	501.286	273.084	149.528	65.8937	0	50.0776	57.2425	0	0	0
2000199	0409S	Girasol (Secano)	S	0	577.14	317.946	566.773	594.42	691.186	532.213	691.186	711.922	428.535	584.052	643.494	586.126	0.264769	0.278805	0.234343	0.404844	0.388245	0.225644	0.365759	0.377503	0.503866	0.340705	0.308668	0.364	105.37	55.288	105.036	94.5357	151.926	102.611	154.146	183.163	139.724	197.566	224.383	223.798	194.114	161.928	71.4688	0	63.5273	43.9063	0.650639	0	0
2000199	0421S	Colza (Secano)	S	3	0	0	408.077	802.551	1428.27	782.147	646.121	1210.63	639.32	1190.22	918.173	1057.6	0	0	0	0	0	0	0	0.333804	0.444357	0.445012	0.496283	0.4763	0	0	101.919	194.17	337.552	184.668	152.402	283.323	151.693	496.038	345.816	405.446	0	0	0	0	0	0	0	0	0
2000199	0602R	Maíz forrajero	R	18	59690.6	60376.7	60376.7	60376.7	59690.6	54887.9	48026.9	46654.7	46654.7	46654.7	40479.8	39793.7	0.0413174	0.0364542	0.0393728	0.0513487	0.0446405	0.0353342	0.0447485	0.0526814	0.0573758	0.0487857	0.0478587	0.0318	1511.22	1465.56	1406.78	1362.78	1316.08	1209	1056.83	1018.62	1032.73	1466.93	935.988	1165.71	0	0	0	0	0	0	0	0	0
2000199	0606R	Alfalfa	R	4	55382.9	59698.4	59788.3	59338.8	59698.4	57540.6	46751.8	46751.8	43155.5	43874.7	35962.9	35243.6	0.136358	0.138243	0.117224	0.128445	0.167895	0.145286	0.116414	0.139242	0.167351	0.166491	0.148804	0.1513	643.946	811.909	773.086	1046.55	1079.97	1797.44	1039.98	792.121	880.304	1106.46	221.636	984.858	0	0	0	0	16.0774	19.829	0	0	0
2000199	0606S	Alfalfa (Secano)	S	1	11333.3	44666.7	36666.7	40000	16666.7	16666.7	0	36666.7	11333.3	17000	11333.3	12000	0.136358	0.138243	0.117224	0.128445	0.167895	0.145286	0.116414	0.139242	0.167351	0.166491	0.148804	0.1513	252.947	955.801	753.146	795.913	154.916	162.836	0	471.957	156.896	303.16	738.676	222.781	0	0	0	0	107.286	100.508	0	0	0
2000199	0610R	Veza para forraje	R	12	28636.4	25200	25200	28636.4	28636.4	20618.2	19472.7	19472.7	14890.9	16609.1	13745.5	13745.5	0.12058	0.130403	0.109911	0.112223	0.12557	0.133963	0.0985969	0.103289	0.132008	0.12557	0.152524	0.1272	475.342	401.052	384.968	423.779	413.962	297.759	280.941	278.747	216.113	240.098	199.193	201.431	0	0	0	0	0	0	0	0	0
2000199	0610S	Veza para forraje (Secano)	S	20	14349.4	10905.6	13201.5	15153	15153	12053.5	12627.5	12627.5	11594.3	16645.4	12627.5	12627.5	0.12058	0.130403	0.109911	0.112223	0.12557	0.133963	0.0985969	0.103289	0.132008	0.12557	0.152524	0.1272	416.077	303.178	352.287	391.715	382.641	304.074	228.187	245.901	273.055	410.362	314.101	317.928	0	0	0	0	0	0	0	0	0
2000199	0701R	Col	R	0	17675.8	15845	17596.3	36206.3	18773.6	18182.7	17879.7	18773.6	18773.6	20561.6	22349.6	25031.5	0.290566	0.355545	0.318393	0.306995	0.300586	0.293176	0.250947	0.245312	0.304898	0.295672	0.271769	0.4429	1541.56	1029.6	1230.56	1622.15	1703.23	1736.27	780.966	1813.07	1496.04	2163.16	2399.06	1092.28	0	0	0	0	0	0	0	0	0
2000199	0711R	Sandia	R	0	10657.9	10657.9	10657.9	4973.68	10657.9	8100	9236.84	10657.9	11013.2	12789.5	17763.2	17763.2	0.202463	0.218627	0.228832	0.24765	0.371897	0.231054	0.401795	0.241638	0.205413	0.272604	0.176353	0.2735	1360.28	1280.62	1291.04	338.302	708.141	1222.06	1773.9	1516.07	2071.84	2297.63	3313.76	1910.43	0	0	0	0	0	0	0	0	0
2000199	0712R	Melón	R	0	10666.7	10666.7	10666.7	5333.33	6666.67	9333.33	8666.67	9333.33	9666.67	11000	16000	16000	0.342507	0.28532	0.328674	0.355663	0.421844	0.301493	0.370564	0.258124	0.275395	0.336392	0.26463	0.4248	1862.77	2008.07	1783.28	500.685	1104.14	1875.93	1529.46	1457.18	1547.02	1816.13	2832.75	3548.23	59.3455	0	0	0	0	32.8045	0	0	0
2000199	0723R	Ajo	R	0	5860.47	5860.47	5860.47	6593.02	6593.02	6373.26	6373.26	7325.58	7325.58	7325.58	6300	6300	0.988823	1.13443	1.48269	1.35448	1.26403	1.20787	1.69567	1.86626	1.35089	1.17737	0.943399	1.3569	1440.09	1065.36	1394.88	1350.68	1922.36	1621.55	1872.79	2497.7	2229.36	3806.94	3122.09	1257.04	246.377	0	0	0	0	0	0	0	0
2000199	0724R	Cebolla	R	0	14058.8	13649.3	14331.8	14331.8	14331.8	16122.5	15696.7	15014.2	15014.2	18502.3	19027.1	17744.1	0.18634	0.175012	0.19873	0.251551	0.164084	0.139574	0.248044	0.173705	0.202694	0.263377	0.181481	0.2555	1146.28	1022.97	1249.06	618.706	1394.66	1309.63	1360.26	1425.64	635.66	2339.54	2430.67	2638.11	0	0	0	0	0	0	0	0	0
2000199	0732R	Guisantes verdes	R	0	11000	11000	11000	10000	10000	10000	10000	10000	10000	10000	12000	14000	0.6796	0.661623	0.695398	0.746235	0.73276	0.612003	0.680769	0.598284	0.60325	0.655633	0.615728	0.5243	2038.24	1954.19	1875.81	1651.94	1613.68	1612.09	1610.5	1597.93	1620.06	1613.68	1941.2	1245.55	0	0	0	0	0	0	0	0	0
2000199	1201R	Manzano	R	0	6750	5867.74	10760.3	1940.03	2247.35	1985.29	2620.59	2580.88	3176.47	3440.91	3573.53	3573.53	0.3622	0.279909	0.313305	0.388313	0.341306	0.261013	0.296591	0.302519	0.388573	0.418333	0.307462	0.3469	868.656	671.627	1044.15	160.622	519.084	455.328	611.421	575.484	829.773	1043.48	1251.09	890.949	0	0	0	0	0	0	0	0	0
2000199	1202R	Peral	R	0	16200	7830	14220	3900.6	2399.4	0	0	0	0	0	0	0	0.544509	0.432065	0.4247	0.635142	0.538588	0.477539	0.469161	0.394089	0.459763	0.572388	0.446815	0.5097	2213.32	1018.88	2079.35	878.386	398.046	0	0	0	0	0	0	0	0	115.232	0	238.224	0	0	0	0	0
2000199	1218S	Almendro (Secano)	S	1	256.46	1775.49	1972.77	453.737	1566.38	1380.94	355.098	1134.34	921.283	84.829	1081.08	1092.91	1.55314	1.60106	1.02979	0.91113	0.868761	0.617514	0.727415	0.6832	0.903617	1.49862	1.48392	1.8548	228.086	1513.94	1614.7	359.763	1213.2	1068.52	274.491	869.999	716.38	26.9118	457.474	843.992	0	0	0	0	0	0	0	0	0
2000199	1302R	Vid	R	0	0	0	0	0	0	0	0	2250	2812.5	3375	3375	3375	0.476906	0.557499	0.53334	0.563065	0.536381	0.568517	0.618308	0.596894	0.612917	0.619928	0.804649	0.7017	0	0	0	0	0	0	0	457.763	627.314	947.574	778.342	723.76	0	0	0	0	0	56.1504	32.3418	0	6.49468
2000199	1302S	Vid (Secano)	S	0	3286.73	3118.18	2663.1	1350.09	1468.07	1459.65	1709.1	984.335	1163	1287.73	1522.01	1439.42	0.476906	0.557499	0.53334	0.563065	0.536381	0.568517	0.618308	0.596894	0.612917	0.619928	0.804649	0.7017	1130.17	1344.31	1489.4	390.394	410.329	480	676.375	398.223	567.708	621.747	783.704	807.373	0	0	0	0	0	0	0	0	0
2000199	1402S	Olivar (Secano)	S	0	1738.43	1306.82	3472.87	799.28	1648.51	1278.85	2529.72	1498.65	1462.68	2601.66	2455.79	1800.38	2.71019	3.28732	3.45681	2.54235	2.37026	1.95638	1.88335	1.77595	1.90863	2.52672	2.16219	3.19687	193	144.394	452.305	192.469	257.596	192.947	325.117	412.872	407.644	809.453	652.671	363.861	139.79	210.147	152.583	0	74.0082	79.2558	3.9639	0	6.89745
2000202	0101R	Trigo	R	4	1879.79	1011.24	1521.23	2304.16	2347.43	1424.57	1647.8	2093.82	1858.15	1932.26	1280.04	1813.51	0.162961	0.154143	0.147643	0.215924	0.219547	0.160616	0.174271	0.228528	0.249617	0.214031	0.21084	0.2024	196.563	114.712	97.866	143.598	271.533	186.176	232.673	320.229	375.959	403.054	276.245	421.718	273.003	259.901	0	0	43.3779	51.0002	0	0	0
2000202	0101S	Trigo (Secano)	S	3	1636.91	729.136	1116.58	1965.45	2000.5	958.877	1340.97	1731.82	1247.03	1652.48	1152.6	1260.66	0.162961	0.154143	0.147643	0.215924	0.219547	0.160616	0.174271	0.228528	0.249617	0.214031	0.21084	0.2024	173.586	75.5093	204.561	141.281	269.291	135.255	156.018	238.129	213.56	304.161	202.401	218.917	166.336	159.51	48.9778	0	40.8705	42.7841	0	0	0
2000202	0102R	Cebada	R	7	1854.24	1040.44	1101.5	2092.63	2171.34	1271.14	1357.09	1625.79	1299.19	1519.04	1130.91	1528.99	0.145456	0.146635	0.133229	0.18851	0.170202	0.124946	0.150448	0.193469	0.224847	0.181234	0.163886	0.174	189.241	96.1491	92.1537	110.629	211.55	149.094	191.508	243.099	257.205	314.553	231.368	358.819	286.109	241.572	57.5417	0	58.1515	65.4687	0	0	0
2000202	0102S	Cebada (Secano)	S	4	1491.83	781.785	951.938	1803.16	1954.46	689.81	1177.28	1221.88	1106.46	1238.44	863.643	1177.28	0.145456	0.146635	0.133229	0.18851	0.170202	0.124946	0.150448	0.193469	0.224847	0.181234	0.163886	0.174	175.46	87.0674	109.572	122.92	297.761	99.0327	150.053	184	202.461	229.481	156.499	219.529	176.321	154.474	41.8553	0	40.8404	46.9423	0	0	0
2000202	0103R	Avena	R	71	1651.38	990.826	1155.96	1827.52	2422.02	1299.08	1436.7	1359.63	1229.17	1332.66	1045.87	1257.8	0.143959	0.156241	0.135667	0.16243	0.171606	0.12715	0.139837	0.18026	0.218604	0.167795	0.160668	0.1821	107.518	61.8503	69.2649	106.079	137.33	73.5863	81.3014	161.651	69.9709	75.5627	59.4481	71.1077	0	0	0	0	0	0	0	0	0
2000202	0103S	Avena (Secano)	S	5	1412.23	790.848	960.315	1666.43	1672.08	632.678	1256.88	1231.46	1080.07	1334.27	869.932	996.468	0.143959	0.156241	0.135667	0.16243	0.171606	0.12715	0.139837	0.18026	0.218604	0.167795	0.160668	0.1821	149.516	86.2292	105.259	157.29	200.917	71.9927	170.276	200.201	228.475	287.429	185.523	206.217	0	149.517	19.8624	0	75.4525	50.389	0	0	0
2000202	0104R	Centeno	R	0	2640	1200	2400	2940	3000	1800	2148	3175.2	2548.8	2812.8	0	0	0.143037	0.144979	0.135667	0.182657	0.160774	0.12204	0.146644	0.182346	0.220718	0.170001	0.152223	0.1638	477.667	208.168	399.639	474.243	472.712	283.348	392.376	495.435	403.206	443.215	0	0	0	0	0	0	0	0	0	0	0
2000202	0104S	Centeno (Secano)	S	5	836.799	418.4	708.818	964.781	1112.45	580.837	851.566	1094.73	850.09	1110.48	659.103	788.068	0.143037	0.144979	0.135667	0.182657	0.160774	0.12204	0.146644	0.182346	0.220718	0.170001	0.152223	0.1638	98.8423	53.636	85.2723	75.1334	196.273	101.288	121.271	190.191	193.498	249.544	156.404	187.943	171.967	153.702	38.824	0	91.4396	62.7433	0	0	0
2000202	0105S	Triticale (Secano)	S	4	1649.48	824.74	1148.75	1620.03	1737.85	907.215	1561.12	1590.57	1222.97	1583.5	1234.75	1237.11	0.156166	0.159443	0.147961	0.188715	0.185346	0.154804	0.174972	0.204791	0.22092	0.198886	0.181481	0.1764	166.398	79.7682	106.65	145.699	152.675	79.6229	136.879	138.372	180.548	188.61	174.436	203.993	0	0	0	0	0	0	0	0	0
2000202	0108R	Maiz	R	21	4787.07	4376.75	4946.64	4559.11	4331.16	5151.8	5607.71	5926.85	5851.62	5015.03	5584.92	5584.92	0.16895	0.149064	0.160998	0.209968	0.182538	0.144484	0.18298	0.215418	0.234614	0.199488	0.170622	0.1729	534.691	478.488	611.394	412.747	622.632	724.599	804.784	1033.63	1365.34	1237.41	1307.17	1406.54	460.553	512.118	117.076	0	115.45	115.838	0	0	0
2000202	0203S	Lentejas (Secano)	S	0	422.222	113.333	277.778	386.667	296	200	160	320	177.778	360	299.556	160	0.5414	0.629713	0.644947	0.594483	0.609698	0.609097	0.718606	0.756694	0.800406	0.551626	0.464812	0.5955	194.493	34.7817	115.949	110.345	82.5141	55.6979	84.1987	189.505	120.18	298.386	270.531	136.767	144.673	0	0	0	0	0	24.8945	99.5551	86.0419
2000202	0204S	Garbanzos (Secano)	S	3	368.412	147.365	340.781	322.36	414.463	290.124	437.489	377.622	322.36	331.571	377.162	267.099	0.636873	0.574725	0.594708	0.649413	0.659244	0.672021	0.628918	0.64824	0.658732	0.667067	0.551682	0.5891	182.842	56.1133	133.726	75.6208	149.754	101.874	167.055	85.6877	173.048	216.231	241.744	169.105	211.377	161.155	0	0	141.407	153.582	0	0	80.4031
2000202	0205S	Guisantes secos (Secano)	S	0	493.963	167.119	285.927	384.522	443.679	320.435	374.663	527.485	423.96	453.539	421.988	492.977	0.183	0.168498	0.164072	0.226191	0.218243	0.187869	0.2031	0.222072	0.268346	0.260067	0.255984	0.2289	122.661	37.6248	62.1852	46.2613	113.467	68.8065	86.7011	124.881	127.808	150.614	134.502	161.745	245.306	186.54	95.1786	0	118.359	112.431	50.6398	54.7533	0
2000202	0303R	Patata	R	11	16651.5	17686.6	16521.4	16415.7	15837.8	20251.8	18001.6	18001.6	19451.2	18811.7	19576.8	20016.9	0.255555	0.189698	0.283946	0.251141	0.226568	0.150295	0.259555	0.211247	0.248208	0.348929	0.174342	0.2281	1191.01	1367.44	1352.28	744.895	1475.38	1922.93	1716.42	1833.53	2308.73	2302.22	2323.79	2479.2	0	0	0	0	0	0	0	0	0
2000202	0402R	Remolacha	R	4	36494.1	36674.8	33384.1	36963.7	36449.4	39356.4	38462	45098.4	40621.6	34901.1	43832.8	43189.6	0.0700215	0.0607298	0.0463174	0.0360386	0.0372097	0.0371731	0.0358352	0.0309868	0.034739	0.0341005	0.034587	0.0381	930.041	926.773	859.916	521.596	1019.53	1072.02	1100.37	1518.72	1624.81	1401.91	1659.5	1789.76	0	6.56986	223.5	0	485.09	1443.1	1288.7	1123.75	982.056
2000202	0409R	Girasol	R	2	673.2	538.56	538.56	534.072	493.68	376.992	673.2	718.08	628.32	628.32	852.72	740.52	0.264769	0.278805	0.234343	0.404844	0.388245	0.225644	0.365759	0.377503	0.503866	0.340705	0.308668	0.364	99.0222	89.3591	70.4519	46.713	95.1433	68.5661	153.78	183.173	211.15	231.984	331.549	334.191	273.084	149.528	65.8937	0	50.0776	57.2425	0	0	0
2000202	0409S	Girasol (Secano)	S	0	384.76	211.964	377.848	396.28	460.791	354.809	460.791	474.614	285.69	389.368	428.996	390.751	0.264769	0.278805	0.234343	0.404844	0.388245	0.225644	0.365759	0.377503	0.503866	0.340705	0.308668	0.364	70.2466	36.8587	70.0243	42.0159	101.284	68.4072	102.764	122.109	93.1491	131.711	149.589	149.199	194.114	161.928	71.4688	0	63.5273	43.9063	0.650639	0	0
2000202	0602R	Maíz forrajero	R	17	39793.7	40251.1	40251.1	40251.1	39793.7	36591.9	32017.9	31103.1	31103.1	31103.1	26986.5	26529.1	0.0413174	0.0364542	0.0393728	0.0513487	0.0446405	0.0353342	0.0447485	0.0526814	0.0573758	0.0487857	0.0478587	0.0318	671.655	651.36	625.238	605.679	584.926	537.333	469.704	452.721	458.993	977.954	623.992	777.138	0	0	0	0	0	0	0	0	0
2000202	0606R	Alfalfa	R	73	36921.9	39798.9	39858.9	39559.2	39798.9	38360.4	31167.8	31167.8	28770.3	29249.8	23975.3	23495.8	0.136358	0.138243	0.117224	0.128445	0.167895	0.145286	0.116414	0.139242	0.167351	0.166491	0.148804	0.1513	429.298	541.273	515.391	465.134	719.977	1198.29	693.321	528.081	586.869	737.642	147.758	656.572	0	0	0	0	16.0774	19.829	0	0	0
2000202	0606S	Alfalfa (Secano)	S	3	7555.56	29777.8	24444.4	26666.7	11111.1	11111.1	0	24444.4	7555.56	11333.3	7555.56	8000	0.136358	0.138243	0.117224	0.128445	0.167895	0.145286	0.116414	0.139242	0.167351	0.166491	0.148804	0.1513	112.421	424.8	334.732	353.739	103.277	108.557	0	314.638	104.597	202.107	492.45	148.521	0	0	0	0	107.286	100.508	0	0	0
2000202	0610R	Veza para forraje	R	10	19090.9	16800	16800	19090.9	19090.9	13745.5	12981.8	12981.8	9927.27	11072.7	9163.64	9163.64	0.12058	0.130403	0.109911	0.112223	0.12557	0.133963	0.0985969	0.103289	0.132008	0.12557	0.152524	0.1272	211.263	178.245	171.097	188.346	183.983	132.338	124.862	123.887	96.05	106.71	88.5301	134.287	0	0	0	0	0	0	0	0	0
2000202	0610S	Veza para forraje (Secano)	S	19	9566.29	7270.38	8800.99	10102	10102	8035.69	8418.34	8418.34	7729.57	11096.9	8418.34	8418.34	0.12058	0.130403	0.109911	0.112223	0.12557	0.133963	0.0985969	0.103289	0.132008	0.12557	0.152524	0.1272	184.923	134.746	156.572	174.096	170.063	135.144	152.125	163.934	182.037	273.575	209.401	141.301	0	0	0	0	0	0	0	0	0
2000202	0701R	Col	R	0	11783.9	10563.3	11730.8	24137.5	12515.8	12121.8	11919.8	12515.8	12515.8	13707.7	14899.7	16687.7	0.290566	0.355545	0.318393	0.306995	0.300586	0.293176	0.250947	0.245312	0.304898	0.295672	0.271769	0.4429	1027.71	686.403	820.376	720.955	1135.48	1157.51	347.096	1208.71	997.359	1442.1	1599.37	485.457	0	0	0	0	0	0	0	0	0
2000202	0711R	Sandia	R	0	7105.26	7105.26	7105.26	3315.79	7105.26	5400	6157.89	7105.26	7342.11	8526.32	11842.1	11842.1	0.202463	0.218627	0.228832	0.24765	0.371897	0.231054	0.401795	0.241638	0.205413	0.272604	0.176353	0.2735	906.856	853.748	860.692	150.357	314.729	814.706	1182.6	1010.71	1381.22	1531.76	2209.17	1273.62	0	0	0	0	0	0	0	0	0
2000202	0712R	Melón	R	0	7111.11	7111.11	7111.11	3555.56	4444.44	6222.22	5777.78	6222.22	6444.44	7333.33	10666.7	10666.7	0.342507	0.28532	0.328674	0.355663	0.421844	0.301493	0.370564	0.258124	0.275395	0.336392	0.26463	0.4248	1241.85	1338.71	1188.86	222.527	736.093	1250.62	1019.64	971.452	1031.34	1210.75	1888.5	2365.49	59.3455	0	0	0	0	32.8045	0	0	0
2000202	0723R	Ajo	R	30	3906.98	3906.98	3906.98	4395.35	4395.35	4248.84	4248.84	4883.72	4883.72	4883.72	4200	4200	0.988823	1.13443	1.48269	1.35448	1.26403	1.20787	1.69567	1.86626	1.35089	1.17737	0.943399	1.3569	960.059	710.239	929.917	600.303	1281.57	1081.03	1248.52	1665.13	1486.24	2537.96	2081.39	558.683	246.377	0	0	0	0	0	0	0	0
2000202	0724R	Cebolla	R	32	9372.51	9099.53	9554.5	9554.5	9554.5	10748.4	10464.5	10009.5	10009.5	12334.9	12684.7	11829.4	0.18634	0.175012	0.19873	0.251551	0.164084	0.139574	0.248044	0.173705	0.202694	0.263377	0.181481	0.2555	764.188	681.978	832.709	274.98	929.771	873.085	906.837	950.426	282.516	1559.69	1620.45	1758.74	0	0	0	0	0	0	0	0	0
2000202	0732R	Guisantes verdes	R	0	7333.33	7333.33	7333.33	6666.67	6666.67	6666.67	6666.67	6666.67	6666.67	6666.67	8000	9333.33	0.6796	0.661623	0.695398	0.746235	0.73276	0.612003	0.680769	0.598284	0.60325	0.655633	0.615728	0.5243	905.883	868.527	833.695	734.197	717.19	716.483	715.778	710.189	720.028	717.19	862.753	830.364	0	0	0	0	0	0	0	0	0
2000202	1201R	Manzano	R	9	4500	3911.82	7173.53	1293.35	1498.24	1323.53	1747.06	1720.59	2117.65	2293.94	2382.35	2382.35	0.3622	0.279909	0.313305	0.388313	0.341306	0.261013	0.296591	0.302519	0.388573	0.418333	0.307462	0.3469	579.104	447.752	696.098	71.3877	346.056	303.552	407.614	383.656	553.182	695.655	834.06	593.966	0	0	0	0	0	0	0	0	0
2000202	1202R	Peral	R	0	10800	5220	9480	2600.4	1599.6	0	0	0	0	0	0	0	0.544509	0.432065	0.4247	0.635142	0.538588	0.477539	0.469161	0.394089	0.459763	0.572388	0.446815	0.5097	1475.55	679.254	1386.23	390.394	265.364	0	0	0	0	0	0	0	0	115.232	0	238.224	0	0	0	0	0
2000202	1218S	Almendro (Secano)	S	2	170.973	1183.66	1315.18	302.491	1044.25	920.625	236.732	756.228	614.189	56.5527	720.718	728.609	1.55314	1.60106	1.02979	0.91113	0.868761	0.617514	0.727415	0.6832	0.903617	1.49862	1.48392	1.8548	101.372	672.864	717.644	159.895	539.199	474.896	121.996	386.666	318.391	17.9412	304.983	375.107	0	0	0	0	0	0	0	0	0
2000202	1302R	Vid	R	0	0	0	0	0	0	0	0	1500	1875	2250	2250	2250	0.476906	0.557499	0.53334	0.563065	0.536381	0.568517	0.618308	0.596894	0.612917	0.619928	0.804649	0.7017	0	0	0	0	0	0	0	305.175	418.21	631.716	518.895	482.506	0	0	0	0	0	56.1504	32.3418	0	6.49468
2000202	1302S	Vid (Secano)	S	0	2191.16	2078.79	1775.4	900.059	978.716	973.098	1139.4	656.223	775.332	858.484	1014.67	959.614	0.476906	0.557499	0.53334	0.563065	0.536381	0.568517	0.618308	0.596894	0.612917	0.619928	0.804649	0.7017	753.448	896.204	992.931	173.509	273.552	320	450.917	265.482	378.472	414.498	522.469	538.249	0	0	0	0	0	0	0	0	0
2000202	1402S	Olivar (Secano)	S	0	1158.96	871.215	2315.25	532.853	1099.01	852.565	1686.48	999.1	975.121	1734.44	1637.19	1200.25	2.71019	3.28732	3.45681	2.54235	2.37026	1.95638	1.88335	1.77595	1.90863	2.52672	2.16219	3.19687	128.666	96.2628	301.537	85.5418	171.73	128.632	216.744	275.248	271.763	539.635	435.114	242.574	139.79	210.147	152.583	0	74.0082	79.2558	3.9639	0	6.89745
2000203	0101R	Trigo	R	2	1879.79	1011.24	1521.23	2304.16	2347.43	1424.57	1647.8	2093.82	1858.15	1932.26	1280.04	1813.51	0.162961	0.154143	0.147643	0.215924	0.219547	0.160616	0.174271	0.228528	0.249617	0.214031	0.21084	0.2024	196.563	114.712	97.866	143.598	271.533	186.176	232.673	320.229	375.959	403.054	276.245	421.718	273.003	259.901	0	0	43.3779	51.0002	0	0	0
2000203	0101S	Trigo (Secano)	S	12	1636.91	729.136	1116.58	1965.45	2000.5	958.877	1340.97	1731.82	1247.03	1652.48	1152.6	1260.66	0.162961	0.154143	0.147643	0.215924	0.219547	0.160616	0.174271	0.228528	0.249617	0.214031	0.21084	0.2024	173.586	75.5093	204.561	141.281	269.291	135.255	156.018	238.129	213.56	304.161	202.401	218.917	166.336	159.51	48.9778	0	40.8705	42.7841	0	0	0
2000203	0102R	Cebada	R	1	1854.24	1040.44	1101.5	2092.63	2171.34	1271.14	1357.09	1625.79	1299.19	1519.04	1130.91	1528.99	0.145456	0.146635	0.133229	0.18851	0.170202	0.124946	0.150448	0.193469	0.224847	0.181234	0.163886	0.174	189.241	96.1491	92.1537	110.629	211.55	149.094	191.508	243.099	257.205	314.553	231.368	358.819	286.109	241.572	57.5417	0	58.1515	65.4687	0	0	0
2000203	0102S	Cebada (Secano)	S	0	1491.83	781.785	951.938	1803.16	1954.46	689.81	1177.28	1221.88	1106.46	1238.44	863.643	1177.28	0.145456	0.146635	0.133229	0.18851	0.170202	0.124946	0.150448	0.193469	0.224847	0.181234	0.163886	0.174	175.46	87.0674	109.572	122.92	297.761	99.0327	150.053	184	202.461	229.481	156.499	219.529	176.321	154.474	41.8553	0	40.8404	46.9423	0	0	0
2000203	0103R	Avena	R	38	1651.38	990.826	1155.96	1827.52	2422.02	1299.08	1436.7	1359.63	1229.17	1332.66	1045.87	1257.8	0.143959	0.156241	0.135667	0.16243	0.171606	0.12715	0.139837	0.18026	0.218604	0.167795	0.160668	0.1821	107.518	61.8503	69.2649	106.079	137.33	73.5863	81.3014	161.651	69.9709	75.5627	59.4481	71.1077	0	0	0	0	0	0	0	0	0
2000203	0103S	Avena (Secano)	S	7	1412.23	790.848	960.315	1666.43	1672.08	632.678	1256.88	1231.46	1080.07	1334.27	869.932	996.468	0.143959	0.156241	0.135667	0.16243	0.171606	0.12715	0.139837	0.18026	0.218604	0.167795	0.160668	0.1821	149.516	86.2292	105.259	157.29	200.917	71.9927	170.276	200.201	228.475	287.429	185.523	206.217	0	149.517	19.8624	0	75.4525	50.389	0	0	0
2000203	0104R	Centeno	R	0	2640	1200	2400	2940	3000	1800	2148	3175.2	2548.8	2812.8	0	0	0.143037	0.144979	0.135667	0.182657	0.160774	0.12204	0.146644	0.182346	0.220718	0.170001	0.152223	0.1638	477.667	208.168	399.639	474.243	472.712	283.348	392.376	495.435	403.206	443.215	0	0	0	0	0	0	0	0	0	0	0
2000203	0104S	Centeno (Secano)	S	6	836.799	418.4	708.818	964.781	1112.45	580.837	851.566	1094.73	850.09	1110.48	659.103	788.068	0.143037	0.144979	0.135667	0.182657	0.160774	0.12204	0.146644	0.182346	0.220718	0.170001	0.152223	0.1638	98.8423	53.636	85.2723	75.1334	196.273	101.288	121.271	190.191	193.498	249.544	156.404	187.943	171.967	153.702	38.824	0	91.4396	62.7433	0	0	0
2000203	0105S	Triticale (Secano)	S	0	1649.48	824.74	1148.75	1620.03	1737.85	907.215	1561.12	1590.57	1222.97	1583.5	1234.75	1237.11	0.156166	0.159443	0.147961	0.188715	0.185346	0.154804	0.174972	0.204791	0.22092	0.198886	0.181481	0.1764	166.398	79.7682	106.65	145.699	152.675	79.6229	136.879	138.372	180.548	188.61	174.436	203.993	0	0	0	0	0	0	0	0	0
2000203	0108R	Maiz	R	4	4787.07	4376.75	4946.64	4559.11	4331.16	5151.8	5607.71	5926.85	5851.62	5015.03	5584.92	5584.92	0.16895	0.149064	0.160998	0.209968	0.182538	0.144484	0.18298	0.215418	0.234614	0.199488	0.170622	0.1729	534.691	478.488	611.394	412.747	622.632	724.599	804.784	1033.63	1365.34	1237.41	1307.17	1406.54	460.553	512.118	117.076	0	115.45	115.838	0	0	0
2000203	0203S	Lentejas (Secano)	S	0	422.222	113.333	277.778	386.667	296	200	160	320	177.778	360	299.556	160	0.5414	0.629713	0.644947	0.594483	0.609698	0.609097	0.718606	0.756694	0.800406	0.551626	0.464812	0.5955	194.493	34.7817	115.949	110.345	82.5141	55.6979	84.1987	189.505	120.18	298.386	270.531	136.767	144.673	0	0	0	0	0	24.8945	99.5551	86.0419
2000203	0204S	Garbanzos (Secano)	S	0	368.412	147.365	340.781	322.36	414.463	290.124	437.489	377.622	322.36	331.571	377.162	267.099	0.636873	0.574725	0.594708	0.649413	0.659244	0.672021	0.628918	0.64824	0.658732	0.667067	0.551682	0.5891	182.842	56.1133	133.726	75.6208	149.754	101.874	167.055	85.6877	173.048	216.231	241.744	169.105	211.377	161.155	0	0	141.407	153.582	0	0	80.4031
2000203	0205S	Guisantes secos (Secano)	S	2	493.963	167.119	285.927	384.522	443.679	320.435	374.663	527.485	423.96	453.539	421.988	492.977	0.183	0.168498	0.164072	0.226191	0.218243	0.187869	0.2031	0.222072	0.268346	0.260067	0.255984	0.2289	122.661	37.6248	62.1852	46.2613	113.467	68.8065	86.7011	124.881	127.808	150.614	134.502	161.745	245.306	186.54	95.1786	0	118.359	112.431	50.6398	54.7533	0
2000203	0206R	Veza	R	2	406.604	158.124	316.247	352.39	384.014	316.247	384.014	451.782	316.247	361.425	368.202	361.425	0.200506	0.212333	0.194385	0.248677	0.290256	0.255703	0.240136	0.216113	0.265426	0.309312	0.347277	0.388	23.5022	31.5897	16.8228	18.159	19.3303	15.9034	19.2923	22.5196	15.9821	18.1932	18.5801	18.1396	0	293.733	0	0	0	0	0	0	0
2000203	0206S	Veza (Secano)	S	1	351.408	143.073	273.596	331.328	371.489	291.167	358.938	502.012	351.408	401.609	409.139	401.609	0.200506	0.212333	0.194385	0.248677	0.290256	0.255703	0.240136	0.216113	0.265426	0.309312	0.347277	0.388	78.3086	35.3057	52.9916	31.1417	34.1077	26.7067	74.4951	45.6416	32.3917	36.8732	37.6573	36.7644	205.665	183.017	0	0	0	0	0	0	0
2000203	0303R	Patata	R	13	16651.5	17686.6	16521.4	16415.7	15837.8	20251.8	18001.6	18001.6	19451.2	18811.7	19576.8	20016.9	0.255555	0.189698	0.283946	0.251141	0.226568	0.150295	0.259555	0.211247	0.248208	0.348929	0.174342	0.2281	1191.01	1367.44	1352.28	744.895	1475.38	1922.93	1716.42	1833.53	2308.73	2302.22	2323.79	2479.2	0	0	0	0	0	0	0	0	0
2000203	0402R	Remolacha	R	1	36494.1	36674.8	33384.1	36963.7	36449.4	39356.4	38462	45098.4	40621.6	34901.1	43832.8	43189.6	0.0700215	0.0607298	0.0463174	0.0360386	0.0372097	0.0371731	0.0358352	0.0309868	0.034739	0.0341005	0.034587	0.0381	930.041	926.773	859.916	521.596	1019.53	1072.02	1100.37	1518.72	1624.81	1401.91	1659.5	1789.76	0	6.56986	223.5	0	485.09	1443.1	1288.7	1123.75	982.056
2000203	0409R	Girasol	R	1	673.2	538.56	538.56	534.072	493.68	376.992	673.2	718.08	628.32	628.32	852.72	740.52	0.264769	0.278805	0.234343	0.404844	0.388245	0.225644	0.365759	0.377503	0.503866	0.340705	0.308668	0.364	99.0222	89.3591	70.4519	46.713	95.1433	68.5661	153.78	183.173	211.15	231.984	331.549	334.191	273.084	149.528	65.8937	0	50.0776	57.2425	0	0	0
2000203	0409S	Girasol (Secano)	S	0	384.76	211.964	377.848	396.28	460.791	354.809	460.791	474.614	285.69	389.368	428.996	390.751	0.264769	0.278805	0.234343	0.404844	0.388245	0.225644	0.365759	0.377503	0.503866	0.340705	0.308668	0.364	70.2466	36.8587	70.0243	42.0159	101.284	68.4072	102.764	122.109	93.1491	131.711	149.589	149.199	194.114	161.928	71.4688	0	63.5273	43.9063	0.650639	0	0
2000203	0602R	Maíz forrajero	R	3	39793.7	40251.1	40251.1	40251.1	39793.7	36591.9	32017.9	31103.1	31103.1	31103.1	26986.5	26529.1	0.0413174	0.0364542	0.0393728	0.0513487	0.0446405	0.0353342	0.0447485	0.0526814	0.0573758	0.0487857	0.0478587	0.0318	671.655	651.36	625.238	605.679	584.926	537.333	469.704	452.721	458.993	977.954	623.992	777.138	0	0	0	0	0	0	0	0	0
2000203	0606R	Alfalfa	R	16	36921.9	39798.9	39858.9	39559.2	39798.9	38360.4	31167.8	31167.8	28770.3	29249.8	23975.3	23495.8	0.136358	0.138243	0.117224	0.128445	0.167895	0.145286	0.116414	0.139242	0.167351	0.166491	0.148804	0.1513	429.298	541.273	515.391	465.134	719.977	1198.29	693.321	528.081	586.869	737.642	147.758	656.572	0	0	0	0	16.0774	19.829	0	0	0
2000203	0606S	Alfalfa (Secano)	S	0	7555.56	29777.8	24444.4	26666.7	11111.1	11111.1	0	24444.4	7555.56	11333.3	7555.56	8000	0.136358	0.138243	0.117224	0.128445	0.167895	0.145286	0.116414	0.139242	0.167351	0.166491	0.148804	0.1513	112.421	424.8	334.732	353.739	103.277	108.557	0	314.638	104.597	202.107	492.45	148.521	0	0	0	0	107.286	100.508	0	0	0
2000203	0610R	Veza para forraje	R	14	19090.9	16800	16800	19090.9	19090.9	13745.5	12981.8	12981.8	9927.27	11072.7	9163.64	9163.64	0.12058	0.130403	0.109911	0.112223	0.12557	0.133963	0.0985969	0.103289	0.132008	0.12557	0.152524	0.1272	211.263	178.245	171.097	188.346	183.983	132.338	124.862	123.887	96.05	106.71	88.5301	134.287	0	0	0	0	0	0	0	0	0
2000203	0610S	Veza para forraje (Secano)	S	77	9566.29	7270.38	8800.99	10102	10102	8035.69	8418.34	8418.34	7729.57	11096.9	8418.34	8418.34	0.12058	0.130403	0.109911	0.112223	0.12557	0.133963	0.0985969	0.103289	0.132008	0.12557	0.152524	0.1272	184.923	134.746	156.572	174.096	170.063	135.144	152.125	163.934	182.037	273.575	209.401	141.301	0	0	0	0	0	0	0	0	0
2000203	0701R	Col	R	0	11783.9	10563.3	11730.8	24137.5	12515.8	12121.8	11919.8	12515.8	12515.8	13707.7	14899.7	16687.7	0.290566	0.355545	0.318393	0.306995	0.300586	0.293176	0.250947	0.245312	0.304898	0.295672	0.271769	0.4429	1027.71	686.403	820.376	720.955	1135.48	1157.51	347.096	1208.71	997.359	1442.1	1599.37	485.457	0	0	0	0	0	0	0	0	0
2000203	0711R	Sandia	R	0	7105.26	7105.26	7105.26	3315.79	7105.26	5400	6157.89	7105.26	7342.11	8526.32	11842.1	11842.1	0.202463	0.218627	0.228832	0.24765	0.371897	0.231054	0.401795	0.241638	0.205413	0.272604	0.176353	0.2735	906.856	853.748	860.692	150.357	314.729	814.706	1182.6	1010.71	1381.22	1531.76	2209.17	1273.62	0	0	0	0	0	0	0	0	0
2000203	0712R	Melón	R	0	7111.11	7111.11	7111.11	3555.56	4444.44	6222.22	5777.78	6222.22	6444.44	7333.33	10666.7	10666.7	0.342507	0.28532	0.328674	0.355663	0.421844	0.301493	0.370564	0.258124	0.275395	0.336392	0.26463	0.4248	1241.85	1338.71	1188.86	222.527	736.093	1250.62	1019.64	971.452	1031.34	1210.75	1888.5	2365.49	59.3455	0	0	0	0	32.8045	0	0	0
2000203	0723R	Ajo	R	0	3906.98	3906.98	3906.98	4395.35	4395.35	4248.84	4248.84	4883.72	4883.72	4883.72	4200	4200	0.988823	1.13443	1.48269	1.35448	1.26403	1.20787	1.69567	1.86626	1.35089	1.17737	0.943399	1.3569	960.059	710.239	929.917	600.303	1281.57	1081.03	1248.52	1665.13	1486.24	2537.96	2081.39	558.683	246.377	0	0	0	0	0	0	0	0
2000203	0724R	Cebolla	R	1	9372.51	9099.53	9554.5	9554.5	9554.5	10748.4	10464.5	10009.5	10009.5	12334.9	12684.7	11829.4	0.18634	0.175012	0.19873	0.251551	0.164084	0.139574	0.248044	0.173705	0.202694	0.263377	0.181481	0.2555	764.188	681.978	832.709	274.98	929.771	873.085	906.837	950.426	282.516	1559.69	1620.45	1758.74	0	0	0	0	0	0	0	0	0
2000203	0732R	Guisantes verdes	R	0	7333.33	7333.33	7333.33	6666.67	6666.67	6666.67	6666.67	6666.67	6666.67	6666.67	8000	9333.33	0.6796	0.661623	0.695398	0.746235	0.73276	0.612003	0.680769	0.598284	0.60325	0.655633	0.615728	0.5243	905.883	868.527	833.695	734.197	717.19	716.483	715.778	710.189	720.028	717.19	862.753	830.364	0	0	0	0	0	0	0	0	0
2000203	1201R	Manzano	R	1	4500	3911.82	7173.53	1293.35	1498.24	1323.53	1747.06	1720.59	2117.65	2293.94	2382.35	2382.35	0.3622	0.279909	0.313305	0.388313	0.341306	0.261013	0.296591	0.302519	0.388573	0.418333	0.307462	0.3469	579.104	447.752	696.098	71.3877	346.056	303.552	407.614	383.656	553.182	695.655	834.06	593.966	0	0	0	0	0	0	0	0	0
2000203	1202R	Peral	R	0	10800	5220	9480	2600.4	1599.6	0	0	0	0	0	0	0	0.544509	0.432065	0.4247	0.635142	0.538588	0.477539	0.469161	0.394089	0.459763	0.572388	0.446815	0.5097	1475.55	679.254	1386.23	390.394	265.364	0	0	0	0	0	0	0	0	115.232	0	238.224	0	0	0	0	0
2000203	1218S	Almendro (Secano)	S	2	170.973	1183.66	1315.18	302.491	1044.25	920.625	236.732	756.228	614.189	56.5527	720.718	728.609	1.55314	1.60106	1.02979	0.91113	0.868761	0.617514	0.727415	0.6832	0.903617	1.49862	1.48392	1.8548	101.372	672.864	717.644	159.895	539.199	474.896	121.996	386.666	318.391	17.9412	304.983	375.107	0	0	0	0	0	0	0	0	0
2000203	1302R	Vid	R	0	0	0	0	0	0	0	0	1500	1875	2250	2250	2250	0.476906	0.557499	0.53334	0.563065	0.536381	0.568517	0.618308	0.596894	0.612917	0.619928	0.804649	0.7017	0	0	0	0	0	0	0	305.175	418.21	631.716	518.895	482.506	0	0	0	0	0	56.1504	32.3418	0	6.49468
2000203	1302S	Vid (Secano)	S	0	2191.16	2078.79	1775.4	900.059	978.716	973.098	1139.4	656.223	775.332	858.484	1014.67	959.614	0.476906	0.557499	0.53334	0.563065	0.536381	0.568517	0.618308	0.596894	0.612917	0.619928	0.804649	0.7017	753.448	896.204	992.931	173.509	273.552	320	450.917	265.482	378.472	414.498	522.469	538.249	0	0	0	0	0	0	0	0	0
2000203	1402S	Olivar (Secano)	S	0	1158.96	871.215	2315.25	532.853	1099.01	852.565	1686.48	999.1	975.121	1734.44	1637.19	1200.25	2.71019	3.28732	3.45681	2.54235	2.37026	1.95638	1.88335	1.77595	1.90863	2.52672	2.16219	3.19687	128.666	96.2628	301.537	85.5418	171.73	128.632	216.744	275.248	271.763	539.635	435.114	242.574	139.79	210.147	152.583	0	74.0082	79.2558	3.9639	0	6.89745
2000204	0101R	Trigo	R	0	1879.79	1011.24	1521.23	2304.16	2347.43	1424.57	1647.8	2093.82	1858.15	1932.26	1280.04	1813.51	0.162961	0.154143	0.147643	0.215924	0.219547	0.160616	0.174271	0.228528	0.249617	0.214031	0.21084	0.2024	196.563	114.712	97.866	143.598	271.533	186.176	232.673	320.229	375.959	403.054	276.245	421.718	273.003	259.901	0	0	43.3779	51.0002	0	0	0
2000204	0101S	Trigo (Secano)	S	2	1636.91	729.136	1116.58	1965.45	2000.5	958.877	1340.97	1731.82	1247.03	1652.48	1152.6	1260.66	0.162961	0.154143	0.147643	0.215924	0.219547	0.160616	0.174271	0.228528	0.249617	0.214031	0.21084	0.2024	173.586	75.5093	204.561	141.281	269.291	135.255	156.018	238.129	213.56	304.161	202.401	218.917	166.336	159.51	48.9778	0	40.8705	42.7841	0	0	0
2000204	0102R	Cebada	R	0	1854.24	1040.44	1101.5	2092.63	2171.34	1271.14	1357.09	1625.79	1299.19	1519.04	1130.91	1528.99	0.145456	0.146635	0.133229	0.18851	0.170202	0.124946	0.150448	0.193469	0.224847	0.181234	0.163886	0.174	189.241	96.1491	92.1537	110.629	211.55	149.094	191.508	243.099	257.205	314.553	231.368	358.819	286.109	241.572	57.5417	0	58.1515	65.4687	0	0	0
2000204	0102S	Cebada (Secano)	S	0	1491.83	781.785	951.938	1803.16	1954.46	689.81	1177.28	1221.88	1106.46	1238.44	863.643	1177.28	0.145456	0.146635	0.133229	0.18851	0.170202	0.124946	0.150448	0.193469	0.224847	0.181234	0.163886	0.174	175.46	87.0674	109.572	122.92	297.761	99.0327	150.053	184	202.461	229.481	156.499	219.529	176.321	154.474	41.8553	0	40.8404	46.9423	0	0	0
2000204	0103R	Avena	R	20	1651.38	990.826	1155.96	1827.52	2422.02	1299.08	1436.7	1359.63	1229.17	1332.66	1045.87	1257.8	0.143959	0.156241	0.135667	0.16243	0.171606	0.12715	0.139837	0.18026	0.218604	0.167795	0.160668	0.1821	107.518	61.8503	69.2649	106.079	137.33	73.5863	81.3014	161.651	69.9709	75.5627	59.4481	71.1077	0	0	0	0	0	0	0	0	0
2000204	0103S	Avena (Secano)	S	0	1412.23	790.848	960.315	1666.43	1672.08	632.678	1256.88	1231.46	1080.07	1334.27	869.932	996.468	0.143959	0.156241	0.135667	0.16243	0.171606	0.12715	0.139837	0.18026	0.218604	0.167795	0.160668	0.1821	149.516	86.2292	105.259	157.29	200.917	71.9927	170.276	200.201	228.475	287.429	185.523	206.217	0	149.517	19.8624	0	75.4525	50.389	0	0	0
2000204	0104R	Centeno	R	10	2640	1200	2400	2940	3000	1800	2148	3175.2	2548.8	2812.8	0	0	0.185949	0.188472	0.176367	0.237454	0.209006	0.158652	0.190637	0.237049	0.286934	0.221002	0.19789	0.21294	477.667	208.168	399.639	474.243	472.712	283.348	392.376	495.435	403.206	443.215	0	0	0	0	0	0	0	0	0	0	0
2000204	0104S	Centeno (Secano)	S	16	836.799	418.4	708.818	964.781	1112.45	580.837	851.566	1094.73	850.09	1110.48	659.103	788.068	0.143037	0.144979	0.135667	0.182657	0.160774	0.12204	0.146644	0.182346	0.220718	0.170001	0.152223	0.1638	98.8423	53.636	85.2723	75.1334	196.273	101.288	121.271	190.191	193.498	249.544	156.404	187.943	171.967	153.702	38.824	0	91.4396	62.7433	0	0	0
2000204	0105R	Triticale	R	8	0	0	0	1467.56	1562.24	1192.99	1420.22	1278.2	1123.87	1372.88	1325.54	1278.2	0.203016	0.207276	0.19235	0.245329	0.24095	0.201246	0.227464	0.266228	0.287196	0.258552	0.235925	0.22932	179.468	88.0886	89.6959	131.13	108.471	119.873	174.694	182.816	229.367	258.532	257.887	333.426	0	0	0	0	0	0	0	0	0
2000204	0105S	Triticale (Secano)	S	10	1649.48	824.74	1148.75	1620.03	1737.85	907.215	1561.12	1590.57	1222.97	1583.5	1234.75	1237.11	0.156166	0.159443	0.147961	0.188715	0.185346	0.154804	0.174972	0.204791	0.22092	0.198886	0.181481	0.1764	166.398	79.7682	106.65	145.699	152.675	79.6229	136.879	138.372	180.548	188.61	174.436	203.993	0	0	0	0	0	0	0	0	0
2000204	0108R	Maiz	R	0	4787.07	4376.75	4946.64	4559.11	4331.16	5151.8	5607.71	5926.85	5851.62	5015.03	5584.92	5584.92	0.16895	0.149064	0.160998	0.209968	0.182538	0.144484	0.18298	0.215418	0.234614	0.199488	0.170622	0.1729	534.691	478.488	611.394	412.747	622.632	724.599	804.784	1033.63	1365.34	1237.41	1307.17	1406.54	460.553	512.118	117.076	0	115.45	115.838	0	0	0
2000204	0203S	Lentejas (Secano)	S	0	422.222	113.333	277.778	386.667	296	200	160	320	177.778	360	299.556	160	0.5414	0.629713	0.644947	0.594483	0.609698	0.609097	0.718606	0.756694	0.800406	0.551626	0.464812	0.5955	194.493	34.7817	115.949	110.345	82.5141	55.6979	84.1987	189.505	120.18	298.386	270.531	136.767	144.673	0	0	0	0	0	24.8945	99.5551	86.0419
2000204	0204S	Garbanzos (Secano)	S	0	368.412	147.365	340.781	322.36	414.463	290.124	437.489	377.622	322.36	331.571	377.162	267.099	0.636873	0.574725	0.594708	0.649413	0.659244	0.672021	0.628918	0.64824	0.658732	0.667067	0.551682	0.5891	182.842	56.1133	133.726	75.6208	149.754	101.874	167.055	85.6877	173.048	216.231	241.744	169.105	211.377	161.155	0	0	141.407	153.582	0	0	80.4031
2000204	0205S	Guisantes secos (Secano)	S	1	493.963	167.119	285.927	384.522	443.679	320.435	374.663	527.485	423.96	453.539	421.988	492.977	0.183	0.168498	0.164072	0.226191	0.218243	0.187869	0.2031	0.222072	0.268346	0.260067	0.255984	0.2289	122.661	37.6248	62.1852	46.2613	113.467	68.8065	86.7011	124.881	127.808	150.614	134.502	161.745	245.306	186.54	95.1786	0	118.359	112.431	50.6398	54.7533	0
2000204	0303R	Patata	R	7	16651.5	17686.6	16521.4	16415.7	15837.8	20251.8	18001.6	18001.6	19451.2	18811.7	19576.8	20016.9	0.255555	0.189698	0.283946	0.251141	0.226568	0.150295	0.259555	0.211247	0.248208	0.348929	0.174342	0.2281	1191.01	1367.44	1352.28	744.895	1475.38	1922.93	1716.42	1833.53	2308.73	2302.22	2323.79	2479.2	0	0	0	0	0	0	0	0	0
2000204	0402R	Remolacha	R	0	36494.1	36674.8	33384.1	36963.7	36449.4	39356.4	38462	45098.4	40621.6	34901.1	43832.8	43189.6	0.0700215	0.0607298	0.0463174	0.0360386	0.0372097	0.0371731	0.0358352	0.0309868	0.034739	0.0341005	0.034587	0.0381	930.041	926.773	859.916	521.596	1019.53	1072.02	1100.37	1518.72	1624.81	1401.91	1659.5	1789.76	0	6.56986	223.5	0	485.09	1443.1	1288.7	1123.75	982.056
2000204	0409R	Girasol	R	0	673.2	538.56	538.56	534.072	493.68	376.992	673.2	718.08	628.32	628.32	852.72	740.52	0.264769	0.278805	0.234343	0.404844	0.388245	0.225644	0.365759	0.377503	0.503866	0.340705	0.308668	0.364	99.0222	89.3591	70.4519	46.713	95.1433	68.5661	153.78	183.173	211.15	231.984	331.549	334.191	273.084	149.528	65.8937	0	50.0776	57.2425	0	0	0
2000204	0409S	Girasol (Secano)	S	0	384.76	211.964	377.848	396.28	460.791	354.809	460.791	474.614	285.69	389.368	428.996	390.751	0.264769	0.278805	0.234343	0.404844	0.388245	0.225644	0.365759	0.377503	0.503866	0.340705	0.308668	0.364	70.2466	36.8587	70.0243	42.0159	101.284	68.4072	102.764	122.109	93.1491	131.711	149.589	149.199	194.114	161.928	71.4688	0	63.5273	43.9063	0.650639	0	0
2000204	0606R	Alfalfa	R	4	36921.9	39798.9	39858.9	39559.2	39798.9	38360.4	31167.8	31167.8	28770.3	29249.8	23975.3	23495.8	0.136358	0.138243	0.117224	0.128445	0.167895	0.145286	0.116414	0.139242	0.167351	0.166491	0.148804	0.1513	429.298	541.273	515.391	465.134	719.977	1198.29	693.321	528.081	586.869	737.642	147.758	656.572	0	0	0	0	16.0774	19.829	0	0	0
2000204	0606S	Alfalfa (Secano)	S	10	7555.56	29777.8	24444.4	26666.7	11111.1	11111.1	0	24444.4	7555.56	11333.3	7555.56	8000	0.136358	0.138243	0.117224	0.128445	0.167895	0.145286	0.116414	0.139242	0.167351	0.166491	0.148804	0.1513	112.421	424.8	334.732	353.739	103.277	108.557	0	314.638	104.597	202.107	492.45	148.521	0	0	0	0	107.286	100.508	0	0	0
2000204	0610R	Veza para forraje	R	8	19090.9	16800	16800	19090.9	19090.9	13745.5	12981.8	12981.8	9927.27	11072.7	9163.64	9163.64	0.12058	0.130403	0.109911	0.112223	0.12557	0.133963	0.0985969	0.103289	0.132008	0.12557	0.152524	0.1272	211.263	178.245	171.097	188.346	183.983	132.338	124.862	123.887	96.05	106.71	88.5301	134.287	0	0	0	0	0	0	0	0	0
2000204	0610S	Veza para forraje (Secano)	S	6	9566.29	7270.38	8800.99	10102	10102	8035.69	8418.34	8418.34	7729.57	11096.9	8418.34	8418.34	0.12058	0.130403	0.109911	0.112223	0.12557	0.133963	0.0985969	0.103289	0.132008	0.12557	0.152524	0.1272	184.923	134.746	156.572	174.096	170.063	135.144	152.125	163.934	182.037	273.575	209.401	141.301	0	0	0	0	0	0	0	0	0
2000204	0701R	Col	R	0	11783.9	10563.3	11730.8	24137.5	12515.8	12121.8	11919.8	12515.8	12515.8	13707.7	14899.7	16687.7	0.290566	0.355545	0.318393	0.306995	0.300586	0.293176	0.250947	0.245312	0.304898	0.295672	0.271769	0.4429	1027.71	686.403	820.376	720.955	1135.48	1157.51	347.096	1208.71	997.359	1442.1	1599.37	485.457	0	0	0	0	0	0	0	0	0
2000204	0711R	Sandia	R	0	7105.26	7105.26	7105.26	3315.79	7105.26	5400	6157.89	7105.26	7342.11	8526.32	11842.1	11842.1	0.202463	0.218627	0.228832	0.24765	0.371897	0.231054	0.401795	0.241638	0.205413	0.272604	0.176353	0.2735	906.856	853.748	860.692	150.357	314.729	814.706	1182.6	1010.71	1381.22	1531.76	2209.17	1273.62	0	0	0	0	0	0	0	0	0
2000204	0712R	Melón	R	0	7111.11	7111.11	7111.11	3555.56	4444.44	6222.22	5777.78	6222.22	6444.44	7333.33	10666.7	10666.7	0.342507	0.28532	0.328674	0.355663	0.421844	0.301493	0.370564	0.258124	0.275395	0.336392	0.26463	0.4248	1241.85	1338.71	1188.86	222.527	736.093	1250.62	1019.64	971.452	1031.34	1210.75	1888.5	2365.49	59.3455	0	0	0	0	32.8045	0	0	0
2000204	0723R	Ajo	R	0	3906.98	3906.98	3906.98	4395.35	4395.35	4248.84	4248.84	4883.72	4883.72	4883.72	4200	4200	0.988823	1.13443	1.48269	1.35448	1.26403	1.20787	1.69567	1.86626	1.35089	1.17737	0.943399	1.3569	960.059	710.239	929.917	600.303	1281.57	1081.03	1248.52	1665.13	1486.24	2537.96	2081.39	558.683	246.377	0	0	0	0	0	0	0	0
2000204	0724R	Cebolla	R	1	9372.51	9099.53	9554.5	9554.5	9554.5	10748.4	10464.5	10009.5	10009.5	12334.9	12684.7	11829.4	0.18634	0.175012	0.19873	0.251551	0.164084	0.139574	0.248044	0.173705	0.202694	0.263377	0.181481	0.2555	764.188	681.978	832.709	274.98	929.771	873.085	906.837	950.426	282.516	1559.69	1620.45	1758.74	0	0	0	0	0	0	0	0	0
2000204	0732R	Guisantes verdes	R	0	7333.33	7333.33	7333.33	6666.67	6666.67	6666.67	6666.67	6666.67	6666.67	6666.67	8000	9333.33	0.6796	0.661623	0.695398	0.746235	0.73276	0.612003	0.680769	0.598284	0.60325	0.655633	0.615728	0.5243	905.883	868.527	833.695	734.197	717.19	716.483	715.778	710.189	720.028	717.19	862.753	830.364	0	0	0	0	0	0	0	0	0
2000204	1201R	Manzano	R	0	4500	3911.82	7173.53	1293.35	1498.24	1323.53	1747.06	1720.59	2117.65	2293.94	2382.35	2382.35	0.3622	0.279909	0.313305	0.388313	0.341306	0.261013	0.296591	0.302519	0.388573	0.418333	0.307462	0.3469	579.104	447.752	696.098	71.3877	346.056	303.552	407.614	383.656	553.182	695.655	834.06	593.966	0	0	0	0	0	0	0	0	0
2000204	1202R	Peral	R	0	10800	5220	9480	2600.4	1599.6	0	0	0	0	0	0	0	0.544509	0.432065	0.4247	0.635142	0.538588	0.477539	0.469161	0.394089	0.459763	0.572388	0.446815	0.5097	1475.55	679.254	1386.23	390.394	265.364	0	0	0	0	0	0	0	0	115.232	0	238.224	0	0	0	0	0
2000204	1218S	Almendro (Secano)	S	1	170.973	1183.66	1315.18	302.491	1044.25	920.625	236.732	756.228	614.189	56.5527	720.718	728.609	1.55314	1.60106	1.02979	0.91113	0.868761	0.617514	0.727415	0.6832	0.903617	1.49862	1.48392	1.8548	101.372	672.864	717.644	159.895	539.199	474.896	121.996	386.666	318.391	17.9412	304.983	375.107	0	0	0	0	0	0	0	0	0
2000204	1302R	Vid	R	0	0	0	0	0	0	0	0	1500	1875	2250	2250	2250	0.476906	0.557499	0.53334	0.563065	0.536381	0.568517	0.618308	0.596894	0.612917	0.619928	0.804649	0.7017	0	0	0	0	0	0	0	305.175	418.21	631.716	518.895	482.506	0	0	0	0	0	56.1504	32.3418	0	6.49468
2000204	1302S	Vid (Secano)	S	0	2191.16	2078.79	1775.4	900.059	978.716	973.098	1139.4	656.223	775.332	858.484	1014.67	959.614	0.476906	0.557499	0.53334	0.563065	0.536381	0.568517	0.618308	0.596894	0.612917	0.619928	0.804649	0.7017	753.448	896.204	992.931	173.509	273.552	320	450.917	265.482	378.472	414.498	522.469	538.249	0	0	0	0	0	0	0	0	0
2000204	1402S	Olivar (Secano)	S	0	1158.96	871.215	2315.25	532.853	1099.01	852.565	1686.48	999.1	975.121	1734.44	1637.19	1200.25	2.71019	3.28732	3.45681	2.54235	2.37026	1.95638	1.88335	1.77595	1.90863	2.52672	2.16219	3.19687	128.666	96.2628	301.537	85.5418	171.73	128.632	216.744	275.248	271.763	539.635	435.114	242.574	139.79	210.147	152.583	0	74.0082	79.2558	3.9639	0	6.89745
2000122	0101R	Trigo	R	245	5583.37	3978.15	1932.71	4831.76	3865.41	2340.72	5583.37	5346.08	3992.11	5089.46	4532.19	4386.17	0.162961	0.154143	0.147643	0.215924	0.219547	0.160616	0.174271	0.228528	0.249617	0.214031	0.21084	0.2024	583.835	451.27	300.077	726.725	447.121	305.907	788.382	817.63	807.721	1061.62	978.091	1019.97	273.003	259.901	0	0	43.3779	51.0002	0	0	0
2000122	0101S	Trigo (Secano)	S	707	4028.08	2101.13	1793.04	4681.28	3701.48	2068.47	4136.94	4240.37	1427.25	4354.68	3019.97	2999.28	0.162961	0.154143	0.147643	0.215924	0.219547	0.160616	0.174271	0.228528	0.249617	0.214031	0.21084	0.2024	427.16	217.593	328.49	755.495	498.262	291.77	481.321	583.059	244.424	801.537	530.317	520.837	166.336	159.51	48.9778	0	40.8705	42.7841	0	0	0
2000122	0102R	Cebada	R	168	4253.83	1636.09	2181.45	4908.27	3817.54	2181.45	5671.77	4583.23	3801.18	5069.69	4560.32	4454.52	0.145456	0.146635	0.133229	0.18851	0.170202	0.124946	0.150448	0.193469	0.224847	0.181234	0.163886	0.174	434.141	151.195	182.504	656.806	371.937	255.867	800.38	685.313	752.534	1049.8	932.979	1045.38	286.109	241.572	57.5417	0	58.1515	65.4687	0	0	0
2000122	0102S	Cebada (Secano)	S	294	3579.75	1410.2	2016.59	4664.52	3579.75	1865.81	3905.18	3841.18	1347.29	4355.36	2796.54	2933.23	0.145456	0.146635	0.133229	0.18851	0.170202	0.124946	0.150448	0.193469	0.224847	0.181234	0.163886	0.174	421.027	157.055	232.119	770.293	545.373	267.865	497.746	578.432	246.528	807.042	506.755	546.964	176.321	154.474	41.8553	0	40.8404	46.9423	0	0	0
2000122	0103R	Avena	R	0	1971.84	1046.99	1163.33	2908.32	2326.65	1163.33	2210.32	2068.39	1744.99	3489.98	2791.98	2650.06	0.143959	0.156241	0.135667	0.16243	0.171606	0.12715	0.139837	0.18026	0.218604	0.167795	0.160668	0.1821	184.851	94.1033	100.366	243.066	189.948	94.8806	180.096	245.918	143.025	284.923	228.501	215.713	0	0	0	0	0	0	0	0	0
2000122	0103S	Avena (Secano)	S	0.6	1621.87	926.785	926.785	2316.96	1737.72	984.709	2201.11	2018.07	1014.83	2579.94	1605.66	1577.85	0.143959	0.156241	0.135667	0.16243	0.171606	0.12715	0.139837	0.18026	0.218604	0.167795	0.160668	0.1821	246.825	101.051	101.584	314.358	208.805	112.05	298.195	328.083	214.674	555.771	342.424	326.533	0	149.517	19.8624	0	75.4525	50.389	0	0	0
2000122	0104S	Centeno (Secano)	S	4.4	2017.89	1233.16	1681.58	2690.52	3138.94	1603.1	2802.63	3260.02	1295.94	3025.72	2700.61	3018.99	0.143037	0.144979	0.135667	0.182657	0.160774	0.12204	0.146644	0.182346	0.220718	0.170001	0.152223	0.1638	238.352	158.082	202.297	584.422	553.813	279.554	399.119	566.373	294.982	679.93	640.852	719.984	171.967	153.702	38.824	0	91.4396	62.7433	0	0	0
2000122	0105S	Triticale (Secano)	S	17.2	4142	1248.27	1929.15	4539.18	3631.34	1134.79	3971.78	4312.22	1728.29	3517.86	2836.99	3094.59	0.156166	0.159443	0.147961	0.188715	0.185346	0.154804	0.174972	0.204791	0.22092	0.198886	0.181481	0.1764	871.985	251.953	373.767	851.94	665.765	207.847	726.747	782.879	255.149	419.012	400.786	510.281	0	0	0	0	0	0	0	0	0
2000122	0108R	Maiz	R	0	12402.3	11835.4	12408.2	11251.9	12444.9	12992.9	12992.9	13583.5	12992.9	12992.9	13583.5	14174.1	0.16895	0.149064	0.160998	0.209968	0.182538	0.144484	0.18298	0.215418	0.234614	0.199488	0.170622	0.1729	1385.28	1293.9	1533.63	2496.34	1789.03	1827.45	1864.66	2368.94	3031.61	3205.89	3179.27	3569.68	460.553	512.118	117.076	0	115.45	115.838	0	0	0
2000122	0203S	Lentejas (Secano)	S	0	0	516.707	413.366	516.707	0	516.707	826.731	826.731	310.024	775.061	413.366	465.036	0.5414	0.629713	0.644947	0.594483	0.609698	0.609097	0.718606	0.756694	0.800406	0.551626	0.464812	0.5955	0	317.725	172.545	295.443	0	288.315	435.061	489.594	209.58	642.409	373.314	397.511	144.673	0	0	0	0	0	24.8945	99.5551	86.0419
2000122	0204S	Garbanzos (Secano)	S	0.6	822.663	510.971	408.777	510.971	817.553	509.949	613.165	613.165	204.388	715.359	715.359	459.874	0.636873	0.574725	0.594708	0.649413	0.659244	0.672021	0.628918	0.64824	0.658732	0.667067	0.551682	0.5891	408.287	194.567	160.409	215.361	295.399	179.063	234.136	249.983	109.719	466.516	458.514	291.155	211.377	161.155	0	0	141.407	153.582	0	0	80.4031
2000122	0205S	Guisantes secos (Secano)	S	0	1061.46	530.728	398.046	371.509	530.728	413.967	1061.46	318.437	212.291	743.019	424.582	849.164	0.183	0.168498	0.164072	0.226191	0.218243	0.187869	0.2031	0.222072	0.268346	0.260067	0.255984	0.2289	263.58	119.487	86.5695	72.1479	135.729	88.8905	245.633	75.389	63.9975	246.746	135.329	278.609	245.306	186.54	95.1786	0	118.359	112.431	50.6398	54.7533	0
2000122	0206R	Veza	R	1.6	1061.14	825.328	589.52	0	707.424	996.288	2122.27	1414.85	943.231	1886.46	1768.56	1414.85	0.200506	0.212333	0.194385	0.248677	0.290256	0.255703	0.240136	0.216113	0.265426	0.309312	0.347277	0.388	206.242	164.882	105.448	0	119.74	168.468	358.513	237.143	160.285	319.307	300.09	238.774	0	293.733	0	0	0	0	0	0	0
2000122	0303R	Patata	R	2	38742.6	41883.9	48884.8	37695.5	43978.1	45758.2	39789.7	47119.4	41883.9	41883.9	41883.9	39266.2	0.255555	0.189698	0.283946	0.251141	0.226568	0.150295	0.259555	0.211247	0.248208	0.348929	0.174342	0.2281	2771.08	3238.25	4001.22	4010.67	4096.8	4344.78	3793.88	4799.27	4971.35	5125.84	4971.67	4863.31	0	0	0	0	0	0	0	0	0
2000122	0402R	Remolacha	R	0	85060.7	90140.7	88604.9	105168	94511.9	106326	118140	131454	95818.5	87827.5	109366	110523	0.0700215	0.0607298	0.0463174	0.0360386	0.0372097	0.0371731	0.0358352	0.0309868	0.034739	0.0341005	0.034587	0.0381	2167.74	2277.86	2282.31	3889.42	2643.61	2896.19	3379.9	4426.8	3832.6	3527.86	4140.55	4580.05	0	6.56986	223.5	0	485.09	1443.1	1288.7	1123.75	982.056
2000122	0409R	Girasol	R	230	1724.71	808.458	1699.92	1616.92	1616.92	1616.92	2155.89	1509.12	1492.95	2155.89	2371.48	2802.65	0.264769	0.278805	0.234343	0.404844	0.388245	0.225644	0.365759	0.377503	0.503866	0.340705	0.308668	0.364	253.691	134.141	222.376	385.693	311.616	294.079	492.473	384.958	501.715	795.984	922.063	1264.82	273.084	149.528	65.8937	0	50.0776	57.2425	0	0	0
2000122	0409S	Girasol (Secano)	S	142	1283.16	791.281	1313.1	1069.3	1069.3	1176.23	1603.95	1122.76	539.996	1315.24	1390.09	1497.02	0.264769	0.278805	0.234343	0.404844	0.388245	0.225644	0.365759	0.377503	0.503866	0.340705	0.308668	0.364	234.269	137.597	243.348	350.383	235.037	226.777	357.707	288.864	176.065	444.902	484.716	571.6	194.114	161.928	71.4688	0	63.5273	43.9063	0.650639	0	0
2000122	0606R	Alfalfa	R	5	13500	11250	47250	42750	33750	36562.5	39375	59062.5	56250	56250	50625	50625	0.136358	0.138243	0.117224	0.128445	0.167895	0.145286	0.116414	0.139242	0.167351	0.166491	0.148804	0.1513	156.967	153.002	610.961	626.647	610.549	1142.13	875.887	1000.7	1147.41	1418.55	311.998	1414.68	0	0	0	0	16.0774	19.829	0	0	0
2000122	0606S	Alfalfa (Secano)	S	0	7398.1	4932.07	27126.4	24660.3	18495.3	20344.8	19728.3	34524.5	24660.3	36990.5	34524.5	27126.4	0.136358	0.138243	0.117224	0.128445	0.167895	0.145286	0.116414	0.139242	0.167351	0.166491	0.148804	0.1513	208.501	133.268	703.581	619.611	171.912	198.772	261.187	444.384	341.392	659.649	2250.21	503.604	0	0	0	0	107.286	100.508	0	0	0
2000122	0610R	Veza para forraje	R	0.4	5876.66	4701.33	21156	0	11753.3	4701.33	14104	35260	29383.3	35260	29383.3	25857.3	0.12058	0.130403	0.109911	0.112223	0.12557	0.133963	0.0985969	0.103289	0.132008	0.12557	0.152524	0.1272	92.5684	71.0009	306.691	0	161.23	64.4287	193.096	478.97	404.672	483.691	404.072	378.922	0	0	0	0	0	0	0	0	0
2000122	0610S	Veza para forraje (Secano)	S	3.2	4045.16	3467.28	11557.6	17336.4	10401.9	3467.28	10401.9	17798.7	13869.1	18492.2	15024.9	14447	0.12058	0.130403	0.109911	0.112223	0.12557	0.133963	0.0985969	0.103289	0.132008	0.12557	0.152524	0.1272	107.043	87.9679	281.467	408.993	239.712	79.8252	187.968	346.602	326.628	455.892	373.735	331.951	0	0	0	0	0	0	0	0	0
2000122	0701R	Col	R	0.2	25000	25000	25000	25000	0	27000	0	0	0	0	0	20000	0.290566	0.355545	0.318393	0.306995	0.300586	0.293176	0.250947	0.245312	0.304898	0.295672	0.271769	0.4429	2180.32	1624.5	1748.33	1601.74	0	2578.23	0	0	0	0	0	1248.02	0	0	0	0	0	0	0	0	0
2000122	0723R	Ajo	R	0.2	8000	7900	8000	0	0	1350	2000	2000	2000	2000	0	4400	0.988823	1.13443	1.48269	1.35448	1.26403	1.20787	1.69567	1.86626	1.35089	1.17737	0.943399	1.3569	1965.84	1436.12	1904.12	0	0	343.481	587.702	681.912	608.65	1039.36	0	812.346	246.377	0	0	0	0	0	0	0	0
2000122	0724R	Cebolla	R	0.2	27155.2	27155.2	64064.5	18465.5	0	59741.4	65172.4	59741.4	59741.4	59741.4	54310.3	56482.8	0.18634	0.175012	0.19873	0.251551	0.164084	0.139574	0.248044	0.173705	0.202694	0.263377	0.181481	0.2555	2214.1	2035.19	5583.45	2306.33	0	4852.77	5647.76	5672.6	7317.65	7554.05	6938.03	8397.62	0	0	0	0	0	0	0	0	0
2000122	0728R	Zanahoria	R	0.2	70000	70000	45000	0	0	70000	64000	60000	60000	60100	55000	53000	0	0	0	0.275269	0.292663	0.313616	0.34634	0.281464	0.277106	0.302692	0.293185	0.324	3287.08	3967.78	2118.65	0	0	3746.94	3422.41	3183.45	3227.56	3220.19	2954.21	2831.39	0	0	0	0	0	0	0	0	0
2000122	0732R	Guisantes verdes	R	0	13500	13500	0	12150	12150	0	0	0	0	0	0	0	0.6796	0.661623	0.695398	0.746235	0.73276	0.612003	0.680769	0.598284	0.60325	0.655633	0.615728	0.5243	2867.25	2749.02	0	2300.6	2247.31	0	0	0	0	0	0	0	0	0	0	0	0	0	0	0	0
2000122	1201R	Manzano	R	1	9818.18	14727.3	0	24545.5	0	2601.82	20863.6	24054.5	31339.6	36910.2	37487	38142.4	0.3622	0.279909	0.313305	0.388313	0.341306	0.261013	0.296591	0.302519	0.388573	0.418333	0.307462	0.3469	1263.5	1685.7	0	10497.7	0	596.728	4867.78	5363.67	8186.69	11193.3	13124.2	9509.63	0	0	0	0	0	0	0	0	0
2000122	1202R	Peral	R	0	21600	32400	0	0	0	0	0	0	0	0	0	0	0.544509	0.432065	0.4247	0.635142	0.538588	0.477539	0.469161	0.394089	0.459763	0.572388	0.446815	0.5097	2951.09	4216.06	0	0	0	0	0	0	0	0	0	0	0	115.232	0	238.224	0	0	0	0	0
2000122	1218S	Almendro (Secano)	S	0	503.721	705.21	604.466	201.489	201.489	1511.16	604.466	503.721	551.071	332.456	488.61	531.93	1.55314	1.60106	1.02979	0.91113	0.868761	0.617514	0.727415	0.6832	0.903617	1.49862	1.48392	1.8548	300.926	403.923	332.335	107.313	104.827	785.43	313.863	259.51	287.837	105.471	206.763	275.928	0	0	0	0	0	0	0	0	0
2000122	1302R	Vid	R	0	7118.18	4295.45	0	6750	4050	7363.64	6750	6750	6940.23	8468.18	8468.18	5909.32	0.476906	0.557499	0.53334	0.563065	0.536381	0.568517	0.618308	0.596894	0.612917	0.619928	0.804649	0.7017	857.786	432.11	0	188.916	645.164	981.719	1061.84	1373.29	1547.98	2377.55	1952.93	1267.24	0	0	0	0	0	56.1504	32.3418	0	6.49468
2000122	1302S	Vid (Secano)	S	0	7096.39	3792.9	6117.58	5750.52	3058.79	6729.33	4159.95	4404.65	2991.49	3670.55	4037.6	2942.55	0.476906	0.557499	0.53334	0.563065	0.536381	0.568517	0.618308	0.596894	0.612917	0.619928	0.804649	0.7017	2440.15	1635.19	3421.39	3656.66	854.935	2212.92	1646.3	1781.95	1460.27	1772.23	2079.02	1650.48	0	0	0	0	0	0	0	0	0
2000125	0101R	Trigo	R	637	5583.37	3978.15	1932.71	4831.76	3865.41	2340.72	5583.37	5346.08	3992.11	5089.46	4532.19	4386.17	0.162961	0.154143	0.147643	0.215924	0.219547	0.160616	0.174271	0.228528	0.249617	0.214031	0.21084	0.2024	583.835	451.27	300.077	726.725	447.121	305.907	788.382	817.63	807.721	1061.62	978.091	1019.97	273.003	259.901	0	0	43.3779	51.0002	0	0	0
2000125	0101S	Trigo (Secano)	S	1205	4028.08	2101.13	1793.04	4681.28	3701.48	2068.47	4136.94	4240.37	1427.25	4354.68	3019.97	2999.28	0.162961	0.154143	0.147643	0.215924	0.219547	0.160616	0.174271	0.228528	0.249617	0.214031	0.21084	0.2024	427.16	217.593	328.49	755.495	498.262	291.77	481.321	583.059	244.424	801.537	530.317	520.837	166.336	159.51	48.9778	0	40.8705	42.7841	0	0	0
2000125	0102R	Cebada	R	1258	4253.83	1636.09	2181.45	4908.27	3817.54	2181.45	5671.77	4583.23	3801.18	5069.69	4560.32	4454.52	0.145456	0.146635	0.133229	0.18851	0.170202	0.124946	0.150448	0.193469	0.224847	0.181234	0.163886	0.174	434.141	151.195	182.504	656.806	371.937	255.867	800.38	685.313	752.534	1049.8	932.979	1045.38	286.109	241.572	57.5417	0	58.1515	65.4687	0	0	0
2000125	0102S	Cebada (Secano)	S	718	3579.75	1410.2	2016.59	4664.52	3579.75	1865.81	3905.18	3841.18	1347.29	4355.36	2796.54	2933.23	0.145456	0.146635	0.133229	0.18851	0.170202	0.124946	0.150448	0.193469	0.224847	0.181234	0.163886	0.174	421.027	157.055	232.119	770.293	545.373	267.865	497.746	578.432	246.528	807.042	506.755	546.964	176.321	154.474	41.8553	0	40.8404	46.9423	0	0	0
2000125	0103R	Avena	R	0.5	1971.84	1046.99	1163.33	2908.32	2326.65	1163.33	2210.32	2068.39	1744.99	3489.98	2791.98	2650.06	0.143959	0.156241	0.135667	0.16243	0.171606	0.12715	0.139837	0.18026	0.218604	0.167795	0.160668	0.1821	184.851	94.1033	100.366	243.066	189.948	94.8806	180.096	245.918	143.025	284.923	228.501	215.713	0	0	0	0	0	0	0	0	0
2000125	0103S	Avena (Secano)	S	2.2	1621.87	926.785	926.785	2316.96	1737.72	984.709	2201.11	2018.07	1014.83	2579.94	1605.66	1577.85	0.143959	0.156241	0.135667	0.16243	0.171606	0.12715	0.139837	0.18026	0.218604	0.167795	0.160668	0.1821	246.825	101.051	101.584	314.358	208.805	112.05	298.195	328.083	214.674	555.771	342.424	326.533	0	149.517	19.8624	0	75.4525	50.389	0	0	0
2000125	0104R	Centeno	R	4	2160.52	1401.42	1868.56	3503.55	3737.12	1891.92	2919.63	3425.3	2940.65	4204.26	3853.91	3713.76	0.143037	0.144979	0.135667	0.182657	0.160774	0.12204	0.146644	0.182346	0.220718	0.170001	0.152223	0.1638	442.916	275.45	352.537	640.33	667.197	337.436	533.329	605.559	527.079	750.597	689.747	661.073	0	0	0	0	0	0	0	0	0
2000125	0104S	Centeno (Secano)	S	22.3	2017.89	1233.16	1681.58	2690.52	3138.94	1603.1	2802.63	3260.02	1295.94	3025.72	2700.61	3018.99	0.143037	0.144979	0.135667	0.182657	0.160774	0.12204	0.146644	0.182346	0.220718	0.170001	0.152223	0.1638	238.352	158.082	202.297	584.422	553.813	279.554	399.119	566.373	294.982	679.93	640.852	719.984	171.967	153.702	38.824	0	91.4396	62.7433	0	0	0
2000125	0105S	Triticale (Secano)	S	1.5	4142	1248.27	1929.15	4539.18	3631.34	1134.79	3971.78	4312.22	1728.29	3517.86	2836.99	3094.59	0.156166	0.159443	0.147961	0.188715	0.185346	0.154804	0.174972	0.204791	0.22092	0.198886	0.181481	0.1764	871.985	251.953	373.767	851.94	665.765	207.847	726.747	782.879	255.149	419.012	400.786	510.281	0	0	0	0	0	0	0	0	0
2000125	0203S	Lentejas (Secano)	S	0.3	0	516.707	413.366	516.707	0	516.707	826.731	826.731	310.024	775.061	413.366	465.036	0.5414	0.629713	0.644947	0.594483	0.609698	0.609097	0.718606	0.756694	0.800406	0.551626	0.464812	0.5955	0	317.725	172.545	295.443	0	288.315	435.061	489.594	209.58	642.409	373.314	397.511	144.673	0	0	0	0	0	24.8945	99.5551	86.0419
2000125	0205R	Guisante seco	R	0.2	1309.09	763.636	1585.09	1080	545.455	1101.82	1745.45	436.364	654.545	1090.91	872.727	1309.09	0.183	0.168498	0.164072	0.226191	0.218243	0.187869	0.2031	0.222072	0.268346	0.260067	0.255984	0.2289	209.154	128.385	259.712	134.805	66.5063	192.213	439.452	52.6857	80.1234	133.013	106.673	159.144	354.829	263.037	125.174	0	0	167.83	55.1042	0	0
2000125	0206S	Veza (Secano)	S	3.4	829.784	592.703	474.163	829.784	711.244	586.776	1659.57	1066.87	474.163	1185.41	948.325	948.325	0.200506	0.212333	0.194385	0.248677	0.290256	0.255703	0.240136	0.216113	0.265426	0.309312	0.347277	0.388	184.911	146.259	91.8383	201.925	169.07	139.345	344.432	251.129	113.159	281.783	225.983	224.761	205.665	183.017	0	0	0	0	0	0	0
2000125	0303R	Patata	R	181	38742.6	41883.9	48884.8	37695.5	43978.1	45758.2	39789.7	47119.4	41883.9	41883.9	41883.9	39266.2	0.255555	0.189698	0.283946	0.251141	0.226568	0.150295	0.259555	0.211247	0.248208	0.348929	0.174342	0.2281	2771.08	3238.25	4001.22	4010.67	4096.8	4344.78	3793.88	4799.27	4971.35	5125.84	4971.67	4863.31	0	0	0	0	0	0	0	0	0
2000125	0402R	Remolacha	R	27	85060.7	90140.7	88604.9	105168	94511.9	106326	118140	131454	95818.5	87827.5	109366	110523	0.0700215	0.0607298	0.0463174	0.0360386	0.0372097	0.0371731	0.0358352	0.0309868	0.034739	0.0341005	0.034587	0.0381	2167.74	2277.86	2282.31	3889.42	2643.61	2896.19	3379.9	4426.8	3832.6	3527.86	4140.55	4580.05	0	6.56986	223.5	0	485.09	1443.1	1288.7	1123.75	982.056
2000125	0409R	Girasol	R	841	1724.71	808.458	1699.92	1616.92	1616.92	1616.92	2155.89	1509.12	1492.95	2155.89	2371.48	2802.65	0.264769	0.278805	0.234343	0.404844	0.388245	0.225644	0.365759	0.377503	0.503866	0.340705	0.308668	0.364	253.691	134.141	222.376	385.693	311.616	294.079	492.473	384.958	501.715	795.984	922.063	1264.82	273.084	149.528	65.8937	0	50.0776	57.2425	0	0	0
2000125	0409S	Girasol (Secano)	S	382	1283.16	791.281	1313.1	1069.3	1069.3	1176.23	1603.95	1122.76	539.996	1315.24	1390.09	1497.02	0.264769	0.278805	0.234343	0.404844	0.388245	0.225644	0.365759	0.377503	0.503866	0.340705	0.308668	0.364	234.269	137.597	243.348	350.383	235.037	226.777	357.707	288.864	176.065	444.902	484.716	571.6	194.114	161.928	71.4688	0	63.5273	43.9063	0.650639	0	0
2000125	0606R	Alfalfa	R	22	13500	11250	47250	42750	33750	36562.5	39375	59062.5	56250	56250	50625	50625	0.136358	0.138243	0.117224	0.128445	0.167895	0.145286	0.116414	0.139242	0.167351	0.166491	0.148804	0.1513	156.967	153.002	610.961	626.647	610.549	1142.13	875.887	1000.7	1147.41	1418.55	311.998	1414.68	0	0	0	0	16.0774	19.829	0	0	0
2000125	0606S	Alfalfa (Secano)	S	0	7398.1	4932.07	27126.4	24660.3	18495.3	20344.8	19728.3	34524.5	24660.3	36990.5	34524.5	27126.4	0.136358	0.138243	0.117224	0.128445	0.167895	0.145286	0.116414	0.139242	0.167351	0.166491	0.148804	0.1513	208.501	133.268	703.581	619.611	171.912	198.772	261.187	444.384	341.392	659.649	2250.21	503.604	0	0	0	0	107.286	100.508	0	0	0
2000125	0610S	Veza para forraje (Secano)	S	0.5	4045.16	3467.28	11557.6	17336.4	10401.9	3467.28	10401.9	17798.7	13869.1	18492.2	15024.9	14447	0.12058	0.130403	0.109911	0.112223	0.12557	0.133963	0.0985969	0.103289	0.132008	0.12557	0.152524	0.1272	107.043	87.9679	281.467	408.993	239.712	79.8252	187.968	346.602	326.628	455.892	373.735	331.951	0	0	0	0	0	0	0	0	0
2000125	0722R	Coliflor	R	10	5000	0	20000	0	0	0	0	0	0	0	0	0	0.397787	0.492022	0.494971	0.451663	0.376109	0.403593	0.547638	0.323077	0.416566	0.514016	0.386187	0.3787	510.593	0	1984.7	0	0	0	0	0	0	0	0	0	0	0	0	0	0	0	0	0	0
2000125	0724R	Cebolla	R	10.2	27155.2	27155.2	64064.5	18465.5	0	59741.4	65172.4	59741.4	59741.4	59741.4	54310.3	56482.8	0.18634	0.175012	0.19873	0.251551	0.164084	0.139574	0.248044	0.173705	0.202694	0.263377	0.181481	0.2555	2214.1	2035.19	5583.45	2306.33	0	4852.77	5647.76	5672.6	7317.65	7554.05	6938.03	8397.62	0	0	0	0	0	0	0	0	0
2000125	0728R	Zanahoria	R	21.1	70000	70000	45000	0	0	70000	64000	60000	60000	60100	55000	53000	0	0	0	0.275269	0.292663	0.313616	0.34634	0.281464	0.277106	0.302692	0.293185	0.324	3287.08	3967.78	2118.65	0	0	3746.94	3422.41	3183.45	3227.56	3220.19	2954.21	2831.39	0	0	0	0	0	0	0	0	0
2000125	1201R	Manzano	R	5	9818.18	14727.3	0	24545.5	0	2601.82	20863.6	24054.5	31339.6	36910.2	37487	38142.4	0.3622	0.279909	0.313305	0.388313	0.341306	0.261013	0.296591	0.302519	0.388573	0.418333	0.307462	0.3469	1263.5	1685.7	0	10497.7	0	596.728	4867.78	5363.67	8186.69	11193.3	13124.2	9509.63	0	0	0	0	0	0	0	0	0
2000125	1202R	Peral	R	0	21600	32400	0	0	0	0	0	0	0	0	0	0	0.544509	0.432065	0.4247	0.635142	0.538588	0.477539	0.469161	0.394089	0.459763	0.572388	0.446815	0.5097	2951.09	4216.06	0	0	0	0	0	0	0	0	0	0	0	115.232	0	238.224	0	0	0	0	0
2000125	1218S	Almendro (Secano)	S	0	503.721	705.21	604.466	201.489	201.489	1511.16	604.466	503.721	551.071	332.456	488.61	531.93	1.55314	1.60106	1.02979	0.91113	0.868761	0.617514	0.727415	0.6832	0.903617	1.49862	1.48392	1.8548	300.926	403.923	332.335	107.313	104.827	785.43	313.863	259.51	287.837	105.471	206.763	275.928	0	0	0	0	0	0	0	0	0
2000125	1302R	Vid	R	0	7118.18	4295.45	0	6750	4050	7363.64	6750	6750	6940.23	8468.18	8468.18	5909.32	0.476906	0.557499	0.53334	0.563065	0.536381	0.568517	0.618308	0.596894	0.612917	0.619928	0.804649	0.7017	857.786	432.11	0	188.916	645.164	981.719	1061.84	1373.29	1547.98	2377.55	1952.93	1267.24	0	0	0	0	0	56.1504	32.3418	0	6.49468
2000125	1302S	Vid (Secano)	S	0	7096.39	3792.9	6117.58	5750.52	3058.79	6729.33	4159.95	4404.65	2991.49	3670.55	4037.6	2942.55	0.476906	0.557499	0.53334	0.563065	0.536381	0.568517	0.618308	0.596894	0.612917	0.619928	0.804649	0.7017	2440.15	1635.19	3421.39	3656.66	854.935	2212.92	1646.3	1781.95	1460.27	1772.23	2079.02	1650.48	0	0	0	0	0	0	0	0	0
2000126	0101R	Trigo	R	72	5583.37	3978.15	1932.71	4831.76	3865.41	2340.72	5583.37	5346.08	3992.11	5089.46	4532.19	4386.17	0.162961	0.154143	0.147643	0.215924	0.219547	0.160616	0.174271	0.228528	0.249617	0.214031	0.21084	0.2024	583.835	451.27	300.077	726.725	447.121	305.907	788.382	817.63	807.721	1061.62	978.091	1019.97	273.003	259.901	0	0	43.3779	51.0002	0	0	0
2000126	0101S	Trigo (Secano)	S	315	4028.08	2101.13	1793.04	4681.28	3701.48	2068.47	4136.94	4240.37	1427.25	4354.68	3019.97	2999.28	0.162961	0.154143	0.147643	0.215924	0.219547	0.160616	0.174271	0.228528	0.249617	0.214031	0.21084	0.2024	427.16	217.593	328.49	755.495	498.262	291.77	481.321	583.059	244.424	801.537	530.317	520.837	166.336	159.51	48.9778	0	40.8705	42.7841	0	0	0
2000126	0102R	Cebada	R	104	4253.83	1636.09	2181.45	4908.27	3817.54	2181.45	5671.77	4583.23	3801.18	5069.69	4560.32	4454.52	0.145456	0.146635	0.133229	0.18851	0.170202	0.124946	0.150448	0.193469	0.224847	0.181234	0.163886	0.174	434.141	151.195	182.504	656.806	371.937	255.867	800.38	685.313	752.534	1049.8	932.979	1045.38	286.109	241.572	57.5417	0	58.1515	65.4687	0	0	0
2000126	0102S	Cebada (Secano)	S	325	3579.75	1410.2	2016.59	4664.52	3579.75	1865.81	3905.18	3841.18	1347.29	4355.36	2796.54	2933.23	0.145456	0.146635	0.133229	0.18851	0.170202	0.124946	0.150448	0.193469	0.224847	0.181234	0.163886	0.174	421.027	157.055	232.119	770.293	545.373	267.865	497.746	578.432	246.528	807.042	506.755	546.964	176.321	154.474	41.8553	0	40.8404	46.9423	0	0	0
2000126	0103R	Avena	R	2.9	1971.84	1046.99	1163.33	2908.32	2326.65	1163.33	2210.32	2068.39	1744.99	3489.98	2791.98	2650.06	0.143959	0.156241	0.135667	0.16243	0.171606	0.12715	0.139837	0.18026	0.218604	0.167795	0.160668	0.1821	184.851	94.1033	100.366	243.066	189.948	94.8806	180.096	245.918	143.025	284.923	228.501	215.713	0	0	0	0	0	0	0	0	0
2000126	0103S	Avena (Secano)	S	0.2	1621.87	926.785	926.785	2316.96	1737.72	984.709	2201.11	2018.07	1014.83	2579.94	1605.66	1577.85	0.143959	0.156241	0.135667	0.16243	0.171606	0.12715	0.139837	0.18026	0.218604	0.167795	0.160668	0.1821	246.825	101.051	101.584	314.358	208.805	112.05	298.195	328.083	214.674	555.771	342.424	326.533	0	149.517	19.8624	0	75.4525	50.389	0	0	0
2000126	0104R	Centeno	R	13.4	2160.52	1401.42	1868.56	3503.55	3737.12	1891.92	2919.63	3425.3	2940.65	4204.26	3853.91	3713.76	0.143037	0.144979	0.135667	0.182657	0.160774	0.12204	0.146644	0.182346	0.220718	0.170001	0.152223	0.1638	442.916	275.45	352.537	640.33	667.197	337.436	533.329	605.559	527.079	750.597	689.747	661.073	0	0	0	0	0	0	0	0	0
2000126	0104S	Centeno (Secano)	S	16.5	2017.89	1233.16	1681.58	2690.52	3138.94	1603.1	2802.63	3260.02	1295.94	3025.72	2700.61	3018.99	0.143037	0.144979	0.135667	0.182657	0.160774	0.12204	0.146644	0.182346	0.220718	0.170001	0.152223	0.1638	238.352	158.082	202.297	584.422	553.813	279.554	399.119	566.373	294.982	679.93	640.852	719.984	171.967	153.702	38.824	0	91.4396	62.7433	0	0	0
2000126	0105R	Triticale	R	6.8	4491.59	1418.4	2127.59	4964.39	4018.79	1418.4	4491.59	4964.39	3775.3	4964.39	4136.99	4834.37	0.156166	0.159443	0.147961	0.188715	0.185346	0.154804	0.174972	0.204791	0.22092	0.198886	0.181481	0.1764	899.144	242.553	293.875	726.424	454.042	198.537	1168.62	927.536	778.848	545.052	737.881	975.267	0	0	0	0	0	0	0	0	0
2000126	0105S	Triticale (Secano)	S	2.3	4142	1248.27	1929.15	4539.18	3631.34	1134.79	3971.78	4312.22	1728.29	3517.86	2836.99	3094.59	0.156166	0.159443	0.147961	0.188715	0.185346	0.154804	0.174972	0.204791	0.22092	0.198886	0.181481	0.1764	871.985	251.953	373.767	851.94	665.765	207.847	726.747	782.879	255.149	419.012	400.786	510.281	0	0	0	0	0	0	0	0	0
2000126	0108R	Maiz	R	0	12402.3	11835.4	12408.2	11251.9	12444.9	12992.9	12992.9	13583.5	12992.9	12992.9	13583.5	14174.1	0.16895	0.149064	0.160998	0.209968	0.182538	0.144484	0.18298	0.215418	0.234614	0.199488	0.170622	0.1729	1385.28	1293.9	1533.63	2496.34	1789.03	1827.45	1864.66	2368.94	3031.61	3205.89	3179.27	3569.68	460.553	512.118	117.076	0	115.45	115.838	0	0	0
2000126	0203S	Lentejas (Secano)	S	0.3	0	516.707	413.366	516.707	0	516.707	826.731	826.731	310.024	775.061	413.366	465.036	0.5414	0.629713	0.644947	0.594483	0.609698	0.609097	0.718606	0.756694	0.800406	0.551626	0.464812	0.5955	0	317.725	172.545	295.443	0	288.315	435.061	489.594	209.58	642.409	373.314	397.511	144.673	0	0	0	0	0	24.8945	99.5551	86.0419
2000126	0206R	Veza	R	0.2	1061.14	825.328	589.52	0	707.424	996.288	2122.27	1414.85	943.231	1886.46	1768.56	1414.85	0.200506	0.212333	0.194385	0.248677	0.290256	0.255703	0.240136	0.216113	0.265426	0.309312	0.347277	0.388	206.242	164.882	105.448	0	119.74	168.468	358.513	237.143	160.285	319.307	300.09	238.774	0	293.733	0	0	0	0	0	0	0
2000126	0206S	Veza (Secano)	S	1.7	829.784	592.703	474.163	829.784	711.244	586.776	1659.57	1066.87	474.163	1185.41	948.325	948.325	0.200506	0.212333	0.194385	0.248677	0.290256	0.255703	0.240136	0.216113	0.265426	0.309312	0.347277	0.388	184.911	146.259	91.8383	201.925	169.07	139.345	344.432	251.129	113.159	281.783	225.983	224.761	205.665	183.017	0	0	0	0	0	0	0
2000126	0303R	Patata	R	97	38742.6	41883.9	48884.8	37695.5	43978.1	45758.2	39789.7	47119.4	41883.9	41883.9	41883.9	39266.2	0.255555	0.189698	0.283946	0.251141	0.226568	0.150295	0.259555	0.211247	0.248208	0.348929	0.174342	0.2281	2771.08	3238.25	4001.22	4010.67	4096.8	4344.78	3793.88	4799.27	4971.35	5125.84	4971.67	4863.31	0	0	0	0	0	0	0	0	0
2000126	0402R	Remolacha	R	1	85060.7	90140.7	88604.9	105168	94511.9	106326	118140	131454	95818.5	87827.5	109366	110523	0.0700215	0.0607298	0.0463174	0.0360386	0.0372097	0.0371731	0.0358352	0.0309868	0.034739	0.0341005	0.034587	0.0381	2167.74	2277.86	2282.31	3889.42	2643.61	2896.19	3379.9	4426.8	3832.6	3527.86	4140.55	4580.05	0	6.56986	223.5	0	485.09	1443.1	1288.7	1123.75	982.056
2000126	0409R	Girasol	R	92	1724.71	808.458	1699.92	1616.92	1616.92	1616.92	2155.89	1509.12	1492.95	2155.89	2371.48	2802.65	0.264769	0.278805	0.234343	0.404844	0.388245	0.225644	0.365759	0.377503	0.503866	0.340705	0.308668	0.364	253.691	134.141	222.376	385.693	311.616	294.079	492.473	384.958	501.715	795.984	922.063	1264.82	273.084	149.528	65.8937	0	50.0776	57.2425	0	0	0
2000126	0409S	Girasol (Secano)	S	138	1283.16	791.281	1313.1	1069.3	1069.3	1176.23	1603.95	1122.76	539.996	1315.24	1390.09	1497.02	0.264769	0.278805	0.234343	0.404844	0.388245	0.225644	0.365759	0.377503	0.503866	0.340705	0.308668	0.364	234.269	137.597	243.348	350.383	235.037	226.777	357.707	288.864	176.065	444.902	484.716	571.6	194.114	161.928	71.4688	0	63.5273	43.9063	0.650639	0	0
2000126	0606R	Alfalfa	R	2	13500	11250	47250	42750	33750	36562.5	39375	59062.5	56250	56250	50625	50625	0.136358	0.138243	0.117224	0.128445	0.167895	0.145286	0.116414	0.139242	0.167351	0.166491	0.148804	0.1513	156.967	153.002	610.961	626.647	610.549	1142.13	875.887	1000.7	1147.41	1418.55	311.998	1414.68	0	0	0	0	16.0774	19.829	0	0	0
2000126	0606S	Alfalfa (Secano)	S	0	7398.1	4932.07	27126.4	24660.3	18495.3	20344.8	19728.3	34524.5	24660.3	36990.5	34524.5	27126.4	0.136358	0.138243	0.117224	0.128445	0.167895	0.145286	0.116414	0.139242	0.167351	0.166491	0.148804	0.1513	208.501	133.268	703.581	619.611	171.912	198.772	261.187	444.384	341.392	659.649	2250.21	503.604	0	0	0	0	107.286	100.508	0	0	0
2000126	0701R	Col	R	0	25000	25000	25000	25000	0	27000	0	0	0	0	0	20000	0.290566	0.355545	0.318393	0.306995	0.300586	0.293176	0.250947	0.245312	0.304898	0.295672	0.271769	0.4429	2180.32	1624.5	1748.33	1601.74	0	2578.23	0	0	0	0	0	1248.02	0	0	0	0	0	0	0	0	0
2000126	0724R	Cebolla	R	0.7	27155.2	27155.2	64064.5	18465.5	0	59741.4	65172.4	59741.4	59741.4	59741.4	54310.3	56482.8	0.18634	0.175012	0.19873	0.251551	0.164084	0.139574	0.248044	0.173705	0.202694	0.263377	0.181481	0.2555	2214.1	2035.19	5583.45	2306.33	0	4852.77	5647.76	5672.6	7317.65	7554.05	6938.03	8397.62	0	0	0	0	0	0	0	0	0
2000126	0728R	Zanahoria	R	12.1	70000	70000	45000	0	0	70000	64000	60000	60000	60100	55000	53000	0	0	0	0.275269	0.292663	0.313616	0.34634	0.281464	0.277106	0.302692	0.293185	0.324	3287.08	3967.78	2118.65	0	0	3746.94	3422.41	3183.45	3227.56	3220.19	2954.21	2831.39	0	0	0	0	0	0	0	0	0
2000126	1201R	Manzano	R	2	9818.18	14727.3	0	24545.5	0	2601.82	20863.6	24054.5	31339.6	36910.2	37487	38142.4	0.3622	0.279909	0.313305	0.388313	0.341306	0.261013	0.296591	0.302519	0.388573	0.418333	0.307462	0.3469	1263.5	1685.7	0	10497.7	0	596.728	4867.78	5363.67	8186.69	11193.3	13124.2	9509.63	0	0	0	0	0	0	0	0	0
2000126	1202R	Peral	R	0	21600	32400	0	0	0	0	0	0	0	0	0	0	0.544509	0.432065	0.4247	0.635142	0.538588	0.477539	0.469161	0.394089	0.459763	0.572388	0.446815	0.5097	2951.09	4216.06	0	0	0	0	0	0	0	0	0	0	0	115.232	0	238.224	0	0	0	0	0
2000126	1218S	Almendro (Secano)	S	0	503.721	705.21	604.466	201.489	201.489	1511.16	604.466	503.721	551.071	332.456	488.61	531.93	1.55314	1.60106	1.02979	0.91113	0.868761	0.617514	0.727415	0.6832	0.903617	1.49862	1.48392	1.8548	300.926	403.923	332.335	107.313	104.827	785.43	313.863	259.51	287.837	105.471	206.763	275.928	0	0	0	0	0	0	0	0	0
2000126	1302R	Vid	R	0	7118.18	4295.45	0	6750	4050	7363.64	6750	6750	6940.23	8468.18	8468.18	5909.32	0.476906	0.557499	0.53334	0.563065	0.536381	0.568517	0.618308	0.596894	0.612917	0.619928	0.804649	0.7017	857.786	432.11	0	188.916	645.164	981.719	1061.84	1373.29	1547.98	2377.55	1952.93	1267.24	0	0	0	0	0	56.1504	32.3418	0	6.49468
2000126	1302S	Vid (Secano)	S	0	7096.39	3792.9	6117.58	5750.52	3058.79	6729.33	4159.95	4404.65	2991.49	3670.55	4037.6	2942.55	0.476906	0.557499	0.53334	0.563065	0.536381	0.568517	0.618308	0.596894	0.612917	0.619928	0.804649	0.7017	2440.15	1635.19	3421.39	3656.66	854.935	2212.92	1646.3	1781.95	1460.27	1772.23	2079.02	1650.48	0	0	0	0	0	0	0	0	0
2000127	0101R	Trigo	R	10	4549.41	3241.46	1574.8	3936.99	3149.59	1907.25	4549.41	4356.06	3252.83	4146.97	3692.9	3573.91	0.162961	0.154143	0.147643	0.215924	0.219547	0.160616	0.174271	0.228528	0.249617	0.214031	0.21084	0.2024	475.718	367.701	199.228	482.49	364.321	249.257	642.385	666.217	658.143	865.025	796.963	831.088	273.003	259.901	0	0	43.3779	51.0002	0	0	0
2000127	0101S	Trigo (Secano)	S	983	3282.14	1712.03	1460.99	3814.38	3016.02	1685.42	3370.84	3455.11	1162.94	3548.26	2460.72	2443.86	0.162961	0.154143	0.147643	0.215924	0.219547	0.160616	0.174271	0.228528	0.249617	0.214031	0.21084	0.2024	348.056	177.298	267.659	501.591	405.991	237.739	392.188	475.085	199.16	653.104	432.11	424.386	166.336	159.51	48.9778	0	40.8705	42.7841	0	0	0
2000127	0102R	Cebada	R	117	3466.08	1333.11	1777.48	3999.33	3110.59	1777.48	4621.45	3734.48	3097.26	4130.86	3715.82	3629.61	0.145456	0.146635	0.133229	0.18851	0.170202	0.124946	0.150448	0.193469	0.224847	0.181234	0.163886	0.174	353.745	123.196	148.707	436.068	303.06	208.484	652.162	558.404	613.176	855.396	760.205	851.788	286.109	241.572	57.5417	0	58.1515	65.4687	0	0	0
2000127	0102S	Cebada (Secano)	S	215	2916.83	1149.06	1643.15	3800.72	2916.83	1520.29	3182	3129.85	1097.79	3548.81	2278.67	2390.04	0.145456	0.146635	0.133229	0.18851	0.170202	0.124946	0.150448	0.193469	0.224847	0.181234	0.163886	0.174	343.059	127.97	189.134	511.415	444.378	218.26	405.571	471.315	200.875	657.59	412.911	445.674	176.321	154.474	41.8553	0	40.8404	46.9423	0	0	0
2000127	0103R	Avena	R	0	1606.68	853.106	947.896	2369.74	1895.79	947.896	1801	1685.36	1421.84	2843.69	2274.95	2159.31	0.143959	0.156241	0.135667	0.16243	0.171606	0.12715	0.139837	0.18026	0.218604	0.167795	0.160668	0.1821	122.727	62.4773	66.6353	161.377	126.111	62.9935	119.57	200.377	94.9577	189.167	151.707	143.217	0	0	0	0	0	0	0	0	0
2000127	0103S	Avena (Secano)	S	0.3	1321.53	755.158	755.158	1887.9	1415.92	802.356	1793.5	1644.36	826.898	2102.17	1308.31	1285.66	0.143959	0.156241	0.135667	0.16243	0.171606	0.12715	0.139837	0.18026	0.218604	0.167795	0.160668	0.1821	163.873	82.3379	82.7721	208.71	170.137	91.3003	242.974	267.327	174.92	452.85	279.012	266.064	0	149.517	19.8624	0	75.4525	50.389	0	0	0
2000127	0104R	Centeno	R	0	1760.43	1141.9	1522.53	2854.74	3045.06	1541.56	2378.95	2790.99	2396.08	3425.69	3140.22	3026.03	0.143037	0.144979	0.135667	0.182657	0.160774	0.12204	0.146644	0.182346	0.220718	0.170001	0.152223	0.1638	294.062	182.877	234.058	425.13	442.968	224.032	434.565	402.045	349.94	498.339	457.939	438.901	0	0	0	0	0	0	0	0	0
2000127	0104S	Centeno (Secano)	S	26.8	1644.21	1004.79	1370.17	2192.28	2557.66	1306.23	2283.62	2656.31	1055.95	2465.4	2200.5	2459.92	0.143037	0.144979	0.135667	0.182657	0.160774	0.12204	0.146644	0.182346	0.220718	0.170001	0.152223	0.1638	194.213	128.808	164.835	388.011	451.255	227.785	325.208	461.489	240.356	554.017	522.176	586.654	171.967	153.702	38.824	0	91.4396	62.7433	0	0	0
2000127	0105S	Triticale (Secano)	S	4.9	3374.96	1017.11	1571.9	3698.59	2958.87	924.648	3236.27	3513.66	1408.24	2866.41	2311.62	2521.51	0.156166	0.159443	0.147961	0.188715	0.185346	0.154804	0.174972	0.204791	0.22092	0.198886	0.181481	0.1764	578.931	167.278	248.152	565.623	442.017	137.994	482.504	519.771	207.899	341.417	326.566	415.785	0	0	0	0	0	0	0	0	0
2000127	0108R	Maiz	R	39	10105.6	9643.64	10110.4	9168.2	10140.3	10586.8	10586.8	11068.1	10586.8	10586.8	11068.1	11549.3	0.16895	0.149064	0.160998	0.209968	0.182538	0.144484	0.18298	0.215418	0.234614	0.199488	0.170622	0.1729	1128.75	1054.29	1249.63	1657.37	1457.73	1489.03	1519.36	1930.25	2470.2	2612.2	2590.52	2908.63	460.553	512.118	117.076	0	115.45	115.838	0	0	0
2000127	0205R	Guisante seco	R	0.5	1066.67	622.222	1291.56	880	444.444	897.778	1422.22	355.556	533.333	888.889	711.111	1066.67	0.183	0.168498	0.164072	0.226191	0.218243	0.187869	0.2031	0.222072	0.268346	0.260067	0.255984	0.2289	170.422	104.61	211.617	89.5002	44.155	156.618	358.072	34.9792	53.1958	88.3101	70.8226	105.66	354.829	263.037	125.174	0	0	167.83	55.1042	0	0
2000127	0206R	Veza	R	0.2	864.629	672.489	480.349	0	576.419	811.79	1729.26	1152.84	768.559	1537.12	1441.05	1152.84	0.200506	0.212333	0.194385	0.248677	0.290256	0.255703	0.240136	0.216113	0.265426	0.309312	0.347277	0.388	136.929	134.349	70.0095	0	79.4982	111.85	238.025	157.444	106.417	211.995	199.236	158.528	0	293.733	0	0	0	0	0	0	0
2000127	0206S	Veza (Secano)	S	3.7	676.121	482.943	386.355	676.121	579.532	478.114	1352.24	869.298	386.355	965.887	772.709	772.709	0.200506	0.212333	0.194385	0.248677	0.290256	0.255703	0.240136	0.216113	0.265426	0.309312	0.347277	0.388	150.668	119.174	74.8312	134.063	112.249	92.5144	280.648	166.73	75.129	187.082	150.035	149.224	205.665	183.017	0	0	0	0	0	0	0
2000127	0303R	Patata	R	9	31568.1	34127.6	39832.1	30714.9	35834	37284.4	32421.2	38393.6	34127.6	34127.6	34127.6	31994.7	0.255555	0.189698	0.283946	0.251141	0.226568	0.150295	0.259555	0.211247	0.248208	0.348929	0.174342	0.2281	2257.92	2638.58	3260.25	2662.77	3338.13	3540.19	3091.31	3910.52	4050.73	4176.61	4050.99	3962.7	0	0	0	0	0	0	0	0	0
2000127	0402R	Remolacha	R	15	69308.7	73448	72196.6	85692.5	77009.7	86635.9	96262.1	107111	78074.3	71563.2	89112.7	90056.1	0.0700215	0.0607298	0.0463174	0.0360386	0.0372097	0.0371731	0.0358352	0.0309868	0.034739	0.0341005	0.034587	0.0381	1766.31	1856.03	1859.66	2582.27	2154.05	2359.86	2753.99	3607.02	3122.86	2874.55	3373.78	3731.89	0	6.56986	223.5	0	485.09	1443.1	1288.7	1123.75	982.056
2000127	0409R	Girasol	R	33	1405.32	658.744	1385.12	1317.49	1317.49	1317.49	1756.65	1229.65	1216.48	1756.65	1932.31	2283.64	0.264769	0.278805	0.234343	0.404844	0.388245	0.225644	0.365759	0.377503	0.503866	0.340705	0.308668	0.364	206.711	109.3	181.195	256.07	253.91	239.62	401.274	313.67	408.805	648.579	751.31	1030.59	273.084	149.528	65.8937	0	50.0776	57.2425	0	0	0
2000127	0409S	Girasol (Secano)	S	224	1045.54	644.747	1069.93	871.28	871.28	958.408	1306.92	914.844	439.997	1071.67	1132.66	1219.79	0.264769	0.278805	0.234343	0.404844	0.388245	0.225644	0.365759	0.377503	0.503866	0.340705	0.308668	0.364	190.886	112.116	198.284	232.628	191.511	184.781	291.465	235.371	143.461	362.513	394.954	465.748	194.114	161.928	71.4688	0	63.5273	43.9063	0.650639	0	0
2000127	0606R	Alfalfa	R	49	11000	9166.67	38500	34833.3	27500	29791.7	32083.3	48125	45833.3	45833.3	41250	41250	0.136358	0.138243	0.117224	0.128445	0.167895	0.145286	0.116414	0.139242	0.167351	0.166491	0.148804	0.1513	127.899	124.668	497.82	416.045	497.485	930.623	713.685	815.388	934.928	1155.86	254.22	1152.7	0	0	0	0	16.0774	19.829	0	0	0
2000127	0606S	Alfalfa (Secano)	S	34	6028.08	4018.72	22103	20093.6	15070.2	16577.2	16074.9	28131.1	20093.6	30140.4	28131.1	22103	0.136358	0.138243	0.117224	0.128445	0.167895	0.145286	0.116414	0.139242	0.167351	0.166491	0.148804	0.1513	138.428	88.48	467.124	411.374	140.077	161.962	212.819	362.091	278.171	537.492	1833.51	410.344	0	0	0	0	107.286	100.508	0	0	0
2000127	0610S	Veza para forraje (Secano)	S	1	3296.06	2825.19	9417.31	14126	8475.58	2825.19	8475.58	14502.7	11300.8	15067.7	12242.5	11771.6	0.12058	0.130403	0.109911	0.112223	0.12557	0.133963	0.0985969	0.103289	0.132008	0.12557	0.152524	0.1272	71.0686	58.4039	186.872	271.54	159.15	52.9978	153.159	282.416	266.141	371.468	304.525	220.39	0	0	0	0	0	0	0	0	0
2000127	0705R	Lechuga	R	3.8	24000	24000	45000	45000	40000	63000	38020	30000	33000	28640	26300	27184	0.370262	0.564456	0.417599	0.432874	0.491449	0.377642	0.468861	0.29795	0.442041	0.418534	0.335916	0.2512	1554.6	1258.04	4279.48	3816.3	3719.25	6430.16	3891.03	3202.99	2744.61	2372.6	2184.13	2245.34	0	0	0	0	0	0	0	0	0
2000127	0706R	Escarola	R	3.2	20000	0	0	0	0	0	0	0	30000	28000	29000	27500	0.604396	0.596146	0.58697	0.568301	0.494859	0.458	0.541833	0.497478	0.504471	0.489443	0.506538	0.5458	1554.6	1258.04	4279.48	3816.3	3719.25	6430.16	3891.03	3202.99	2744.61	2372.6	2184.13	2245.34	0	0	0	0	0	0	0	0	0
2000127	0723R	Ajo	R	0	6518.52	6437.04	6518.52	0	0	1100	1629.63	1629.63	1629.63	1629.63	0	3585.19	0.988823	1.13443	1.48269	1.35448	1.26403	1.20787	1.69567	1.86626	1.35089	1.17737	0.943399	1.3569	1601.79	1170.17	1551.5	0	0	279.873	478.868	555.632	495.937	846.883	0	539.335	246.377	0	0	0	0	0	0	0	0
2000127	0724R	Cebolla	R	0	22126.4	22126.4	52200.7	15046	0	48678.2	53103.4	48678.2	48678.2	48678.2	44252.9	46023	0.18634	0.175012	0.19873	0.251551	0.164084	0.139574	0.248044	0.173705	0.202694	0.263377	0.181481	0.2555	1804.08	1658.3	4549.48	1531.22	0	3954.11	4601.88	4622.12	4858.36	6155.15	5653.21	6842.5	0	0	0	0	0	0	0	0	0
2000127	0732R	Guisantes verdes	R	0	11000	11000	0	9900	9900	0	0	0	0	0	0	0	0.6796	0.661623	0.695398	0.746235	0.73276	0.612003	0.680769	0.598284	0.60325	0.655633	0.615728	0.5243	1903.64	1825.14	0	1527.42	1492.04	0	0	0	0	0	0	0	0	0	0	0	0	0	0	0	0
2000127	1201R	Manzano	R	465	8000	12000	0	20000	0	2120	17000	19600	25536	30075	30545	31079	0.3622	0.279909	0.313305	0.388313	0.341306	0.261013	0.296591	0.302519	0.388573	0.418333	0.307462	0.3469	1029.52	1373.53	0	6969.65	0	486.223	3966.34	4370.4	6670.64	9120.47	10693.8	7748.59	0	0	0	0	0	0	0	0	0
2000127	1202R	Peral	R	0	17600	26400	0	0	0	0	0	0	0	0	0	0	0.544509	0.432065	0.4247	0.635142	0.538588	0.477539	0.469161	0.394089	0.459763	0.572388	0.446815	0.5097	2404.59	3435.31	0	0	0	0	0	0	0	0	0	0	0	115.232	0	238.224	0	0	0	0	0
2000127	1218S	Almendro (Secano)	S	0	410.44	574.615	492.528	164.176	164.176	1231.32	492.528	410.44	449.021	270.89	398.126	433.424	1.55314	1.60106	1.02979	0.91113	0.868761	0.617514	0.727415	0.6832	0.903617	1.49862	1.48392	1.8548	199.792	268.174	220.645	71.2476	69.5972	521.465	208.381	172.295	191.102	85.9391	168.473	183.195	0	0	0	0	0	0	0	0	0
2000127	1302R	Vid	R	2.6	5800	3500	0	5500	3300	6000	5500	5500	5655	6900	6900	4815	0.476906	0.557499	0.53334	0.563065	0.536381	0.568517	0.618308	0.596894	0.612917	0.619928	0.804649	0.7017	698.937	352.089	0	153.931	525.689	799.919	865.201	1118.98	1261.32	1937.26	1591.28	1032.56	0	0	0	0	0	56.1504	32.3418	0	6.49468
2000127	1302S	Vid (Secano)	S	50.4	5782.24	3090.51	4984.69	4685.61	2492.35	5483.16	3389.59	3588.98	2437.51	2990.81	3289.9	2397.64	0.476906	0.557499	0.53334	0.563065	0.536381	0.568517	0.618308	0.596894	0.612917	0.619928	0.804649	0.7017	1988.27	1332.37	2787.8	2427.74	696.614	1803.12	1341.43	1451.96	1189.85	1444.04	1694.01	1344.84	0	0	0	0	0	0	0	0	0
2000128	0101R	Trigo	R	55	4549.41	3241.46	1574.8	3936.99	3149.59	1907.25	4549.41	4356.06	3252.83	4146.97	3692.9	3573.91	0.162961	0.154143	0.147643	0.215924	0.219547	0.160616	0.174271	0.228528	0.249617	0.214031	0.21084	0.2024	475.718	367.701	199.228	482.49	364.321	249.257	642.385	666.217	658.143	865.025	796.963	831.088	273.003	259.901	0	0	43.3779	51.0002	0	0	0
2000128	0101S	Trigo (Secano)	S	280	3282.14	1712.03	1460.99	3814.38	3016.02	1685.42	3370.84	3455.11	1162.94	3548.26	2460.72	2443.86	0.162961	0.154143	0.147643	0.215924	0.219547	0.160616	0.174271	0.228528	0.249617	0.214031	0.21084	0.2024	348.056	177.298	267.659	501.591	405.991	237.739	392.188	475.085	199.16	653.104	432.11	424.386	166.336	159.51	48.9778	0	40.8705	42.7841	0	0	0
2000128	0102R	Cebada	R	328	3466.08	1333.11	1777.48	3999.33	3110.59	1777.48	4621.45	3734.48	3097.26	4130.86	3715.82	3629.61	0.145456	0.146635	0.133229	0.18851	0.170202	0.124946	0.150448	0.193469	0.224847	0.181234	0.163886	0.174	353.745	123.196	148.707	436.068	303.06	208.484	652.162	558.404	613.176	855.396	760.205	851.788	286.109	241.572	57.5417	0	58.1515	65.4687	0	0	0
2000128	0102S	Cebada (Secano)	S	284	2916.83	1149.06	1643.15	3800.72	2916.83	1520.29	3182	3129.85	1097.79	3548.81	2278.67	2390.04	0.145456	0.146635	0.133229	0.18851	0.170202	0.124946	0.150448	0.193469	0.224847	0.181234	0.163886	0.174	343.059	127.97	189.134	511.415	444.378	218.26	405.571	471.315	200.875	657.59	412.911	445.674	176.321	154.474	41.8553	0	40.8404	46.9423	0	0	0
2000128	0103R	Avena	R	0	1606.68	853.106	947.896	2369.74	1895.79	947.896	1801	1685.36	1421.84	2843.69	2274.95	2159.31	0.143959	0.156241	0.135667	0.16243	0.171606	0.12715	0.139837	0.18026	0.218604	0.167795	0.160668	0.1821	122.727	62.4773	66.6353	161.377	126.111	62.9935	119.57	200.377	94.9577	189.167	151.707	143.217	0	0	0	0	0	0	0	0	0
2000128	0103S	Avena (Secano)	S	0.4	1321.53	755.158	755.158	1887.9	1415.92	802.356	1793.5	1644.36	826.898	2102.17	1308.31	1285.66	0.143959	0.156241	0.135667	0.16243	0.171606	0.12715	0.139837	0.18026	0.218604	0.167795	0.160668	0.1821	163.873	82.3379	82.7721	208.71	170.137	91.3003	242.974	267.327	174.92	452.85	279.012	266.064	0	149.517	19.8624	0	75.4525	50.389	0	0	0
2000128	0104R	Centeno	R	3	1760.43	1141.9	1522.53	2854.74	3045.06	1541.56	2378.95	2790.99	2396.08	3425.69	3140.22	3026.03	0.143037	0.144979	0.135667	0.182657	0.160774	0.12204	0.146644	0.182346	0.220718	0.170001	0.152223	0.1638	294.062	182.877	234.058	425.13	442.968	224.032	434.565	402.045	349.94	498.339	457.939	438.901	0	0	0	0	0	0	0	0	0
2000128	0104S	Centeno (Secano)	S	2	1644.21	1004.79	1370.17	2192.28	2557.66	1306.23	2283.62	2656.31	1055.95	2465.4	2200.5	2459.92	0.143037	0.144979	0.135667	0.182657	0.160774	0.12204	0.146644	0.182346	0.220718	0.170001	0.152223	0.1638	194.213	128.808	164.835	388.011	451.255	227.785	325.208	461.489	240.356	554.017	522.176	586.654	171.967	153.702	38.824	0	91.4396	62.7433	0	0	0
2000128	0105S	Triticale (Secano)	S	0.6	3374.96	1017.11	1571.9	3698.59	2958.87	924.648	3236.27	3513.66	1408.24	2866.41	2311.62	2521.51	0.156166	0.159443	0.147961	0.188715	0.185346	0.154804	0.174972	0.204791	0.22092	0.198886	0.181481	0.1764	578.931	167.278	248.152	565.623	442.017	137.994	482.504	519.771	207.899	341.417	326.566	415.785	0	0	0	0	0	0	0	0	0
2000128	0108R	Maiz	R	50	10105.6	9643.64	10110.4	9168.2	10140.3	10586.8	10586.8	11068.1	10586.8	10586.8	11068.1	11549.3	0.16895	0.149064	0.160998	0.209968	0.182538	0.144484	0.18298	0.215418	0.234614	0.199488	0.170622	0.1729	1128.75	1054.29	1249.63	1657.37	1457.73	1489.03	1519.36	1930.25	2470.2	2612.2	2590.52	2908.63	460.553	512.118	117.076	0	115.45	115.838	0	0	0
2000128	0203S	Lentejas (Secano)	S	0	0	421.021	336.817	421.021	0	421.021	673.633	673.633	252.612	631.531	336.817	378.919	0.5414	0.629713	0.644947	0.594483	0.609698	0.609097	0.718606	0.756694	0.800406	0.551626	0.464812	0.5955	0	210.945	140.592	196.151	0	191.419	354.494	398.929	170.769	523.444	304.182	323.898	144.673	0	0	0	0	0	24.8945	99.5551	86.0419
2000128	0206S	Veza (Secano)	S	0.9	676.121	482.943	386.355	676.121	579.532	478.114	1352.24	869.298	386.355	965.887	772.709	772.709	0.200506	0.212333	0.194385	0.248677	0.290256	0.255703	0.240136	0.216113	0.265426	0.309312	0.347277	0.388	150.668	119.174	74.8312	134.063	112.249	92.5144	280.648	166.73	75.129	187.082	150.035	149.224	205.665	183.017	0	0	0	0	0	0	0
2000128	0303R	Patata	R	10	31568.1	34127.6	39832.1	30714.9	35834	37284.4	32421.2	38393.6	34127.6	34127.6	34127.6	31994.7	0.255555	0.189698	0.283946	0.251141	0.226568	0.150295	0.259555	0.211247	0.248208	0.348929	0.174342	0.2281	2257.92	2638.58	3260.25	2662.77	3338.13	3540.19	3091.31	3910.52	4050.73	4176.61	4050.99	3962.7	0	0	0	0	0	0	0	0	0
2000128	0402R	Remolacha	R	100	69308.7	73448	72196.6	85692.5	77009.7	86635.9	96262.1	107111	78074.3	71563.2	89112.7	90056.1	0.0700215	0.0607298	0.0463174	0.0360386	0.0372097	0.0371731	0.0358352	0.0309868	0.034739	0.0341005	0.034587	0.0381	1766.31	1856.03	1859.66	2582.27	2154.05	2359.86	2753.99	3607.02	3122.86	2874.55	3373.78	3731.89	0	6.56986	223.5	0	485.09	1443.1	1288.7	1123.75	982.056
2000128	0409R	Girasol	R	341	1405.32	658.744	1385.12	1317.49	1317.49	1317.49	1756.65	1229.65	1216.48	1756.65	1932.31	2283.64	0.264769	0.278805	0.234343	0.404844	0.388245	0.225644	0.365759	0.377503	0.503866	0.340705	0.308668	0.364	206.711	109.3	181.195	256.07	253.91	239.62	401.274	313.67	408.805	648.579	751.31	1030.59	273.084	149.528	65.8937	0	50.0776	57.2425	0	0	0
2000128	0409S	Girasol (Secano)	S	138	1045.54	644.747	1069.93	871.28	871.28	958.408	1306.92	914.844	439.997	1071.67	1132.66	1219.79	0.264769	0.278805	0.234343	0.404844	0.388245	0.225644	0.365759	0.377503	0.503866	0.340705	0.308668	0.364	190.886	112.116	198.284	232.628	191.511	184.781	291.465	235.371	143.461	362.513	394.954	465.748	194.114	161.928	71.4688	0	63.5273	43.9063	0.650639	0	0
2000128	0606R	Alfalfa	R	47	11000	9166.67	38500	34833.3	27500	29791.7	32083.3	48125	45833.3	45833.3	41250	41250	0.136358	0.138243	0.117224	0.128445	0.167895	0.145286	0.116414	0.139242	0.167351	0.166491	0.148804	0.1513	127.899	124.668	497.82	416.045	497.485	930.623	713.685	815.388	934.928	1155.86	254.22	1152.7	0	0	0	0	16.0774	19.829	0	0	0
2000128	0606S	Alfalfa (Secano)	S	12	6028.08	4018.72	22103	20093.6	15070.2	16577.2	16074.9	28131.1	20093.6	30140.4	28131.1	22103	0.136358	0.138243	0.117224	0.128445	0.167895	0.145286	0.116414	0.139242	0.167351	0.166491	0.148804	0.1513	138.428	88.48	467.124	411.374	140.077	161.962	212.819	362.091	278.171	537.492	1833.51	410.344	0	0	0	0	107.286	100.508	0	0	0
2000128	0610S	Veza para forraje (Secano)	S	3	3296.06	2825.19	9417.31	14126	8475.58	2825.19	8475.58	14502.7	11300.8	15067.7	12242.5	11771.6	0.12058	0.130403	0.109911	0.112223	0.12557	0.133963	0.0985969	0.103289	0.132008	0.12557	0.152524	0.1272	71.0686	58.4039	186.872	271.54	159.15	52.9978	153.159	282.416	266.141	371.468	304.525	220.39	0	0	0	0	0	0	0	0	0
2000128	0705R	Lechuga	R	75.1	24000	24000	45000	45000	40000	63000	38020	30000	33000	28640	26300	27184	0.370262	0.564456	0.417599	0.432874	0.491449	0.377642	0.468861	0.29795	0.442041	0.418534	0.335916	0.2512	1554.6	1258.04	4279.48	3816.3	3719.25	6430.16	3891.03	3202.99	2744.61	2372.6	2184.13	2245.34	0	0	0	0	0	0	0	0	0
2000128	0706R	Escarola	R	63	20000	0	0	0	0	0	0	0	30000	28000	29000	27500	0.604396	0.596146	0.58697	0.568301	0.494859	0.458	0.541833	0.497478	0.504471	0.489443	0.506538	0.5458	1554.6	1258.04	4279.48	3816.3	3719.25	6430.16	3891.03	3202.99	2744.61	2372.6	2184.13	2245.34	0	0	0	0	0	0	0	0	0
2000128	0724R	Cebolla	R	5.8	22126.4	22126.4	52200.7	15046	0	48678.2	53103.4	48678.2	48678.2	48678.2	44252.9	46023	0.18634	0.175012	0.19873	0.251551	0.164084	0.139574	0.248044	0.173705	0.202694	0.263377	0.181481	0.2555	1804.08	1658.3	4549.48	1531.22	0	3954.11	4601.88	4622.12	4858.36	6155.15	5653.21	6842.5	0	0	0	0	0	0	0	0	0
2000128	1201R	Manzano	R	42	8000	12000	0	20000	0	2120	17000	19600	25536	30075	30545	31079	0.3622	0.279909	0.313305	0.388313	0.341306	0.261013	0.296591	0.302519	0.388573	0.418333	0.307462	0.3469	1029.52	1373.53	0	6969.65	0	486.223	3966.34	4370.4	6670.64	9120.47	10693.8	7748.59	0	0	0	0	0	0	0	0	0
2000128	1202R	Peral	R	0	17600	26400	0	0	0	0	0	0	0	0	0	0	0.544509	0.432065	0.4247	0.635142	0.538588	0.477539	0.469161	0.394089	0.459763	0.572388	0.446815	0.5097	2404.59	3435.31	0	0	0	0	0	0	0	0	0	0	0	115.232	0	238.224	0	0	0	0	0
2000128	1218S	Almendro (Secano)	S	0	410.44	574.615	492.528	164.176	164.176	1231.32	492.528	410.44	449.021	270.89	398.126	433.424	1.55314	1.60106	1.02979	0.91113	0.868761	0.617514	0.727415	0.6832	0.903617	1.49862	1.48392	1.8548	199.792	268.174	220.645	71.2476	69.5972	521.465	208.381	172.295	191.102	85.9391	168.473	183.195	0	0	0	0	0	0	0	0	0
2000128	1302R	Vid	R	1.8	5800	3500	0	5500	3300	6000	5500	5500	5655	6900	6900	4815	0.476906	0.557499	0.53334	0.563065	0.536381	0.568517	0.618308	0.596894	0.612917	0.619928	0.804649	0.7017	698.937	352.089	0	153.931	525.689	799.919	865.201	1118.98	1261.32	1937.26	1591.28	1032.56	0	0	0	0	0	56.1504	32.3418	0	6.49468
2000128	1302S	Vid (Secano)	S	14.2	5782.24	3090.51	4984.69	4685.61	2492.35	5483.16	3389.59	3588.98	2437.51	2990.81	3289.9	2397.64	0.476906	0.557499	0.53334	0.563065	0.536381	0.568517	0.618308	0.596894	0.612917	0.619928	0.804649	0.7017	1988.27	1332.37	2787.8	2427.74	696.614	1803.12	1341.43	1451.96	1189.85	1444.04	1694.01	1344.84	0	0	0	0	0	0	0	0	0
2000129	0101R	Trigo	R	50.8	4819.81	3472.99	4054.94	4607.11	4430.14	3742.69	4424.19	4346.76	4255.73	4813.85	4054.94	4587.54	0.162961	0.154143	0.147643	0.215924	0.219547	0.160616	0.174271	0.228528	0.249617	0.214031	0.21084	0.2024	503.992	393.965	633.213	696.934	512.445	489.129	624.703	664.794	861.058	1004.13	875.094	1066.8	273.003	259.901	0	0	43.3779	51.0002	0	0	0
2000129	0101S	Trigo (Secano)	S	61	3101.15	2122.47	2675.77	3545.13	3463.33	2650.48	3227.58	3400.86	2851.28	3495.31	3099.67	2825.25	0.162961	0.154143	0.147643	0.215924	0.219547	0.160616	0.174271	0.228528	0.249617	0.214031	0.21084	0.2024	328.864	219.803	490.209	543.738	466.204	373.866	375.519	467.625	488.297	643.358	544.313	490.615	166.336	159.51	48.9778	0	40.8705	42.7841	0	0	0
2000129	0102R	Cebada	R	176	4611.63	3462.37	3938.12	4875.94	4670.87	3599.99	4584.29	4392.9	4247.08	5049.1	4301.76	4192.39	0.145456	0.146635	0.133229	0.18851	0.170202	0.124946	0.150448	0.193469	0.224847	0.181234	0.163886	0.174	470.658	319.966	329.469	711.472	455.076	422.25	646.919	656.854	840.81	1045.54	880.08	983.86	286.109	241.572	57.5417	0	58.1515	65.4687	0	0	0
2000129	0102S	Cebada (Secano)	S	68	2863.77	1663.75	2321.03	3547.12	3519.47	2393.71	2693.92	3025.72	2678.12	3389.91	2800.57	2532.76	0.145456	0.146635	0.133229	0.18851	0.170202	0.124946	0.150448	0.193469	0.224847	0.181234	0.163886	0.174	336.818	185.292	267.161	530.405	536.19	343.654	343.361	455.634	490.045	628.145	507.484	472.287	176.321	154.474	41.8553	0	40.8404	46.9423	0	0	0
2000129	0103R	Avena	R	0.2	3968.27	2910.06	2232.15	3848.39	3720.25	3265.55	4158.41	3306.89	3575.57	3766.55	3888.08	3430.9	0.143959	0.156241	0.135667	0.16243	0.171606	0.12715	0.139837	0.18026	0.218604	0.167795	0.160668	0.1821	599.35	421.398	310.269	518.193	489.335	429.104	545.891	393.166	472.167	495.424	512.673	449.945	0	0	0	0	0	0	0	0	0
2000129	0103S	Avena (Secano)	S	0	2621	1456.11	1982.61	2949.01	3103.82	2145.85	2529.04	2590.35	2345.11	2797.27	2521.37	2380.36	0.143959	0.156241	0.135667	0.16243	0.171606	0.12715	0.139837	0.18026	0.218604	0.167795	0.160668	0.1821	553.342	158.766	217.312	555.054	372.956	244.177	342.62	421.118	496.078	602.588	537.711	492.61	0	149.517	19.8624	0	75.4525	50.389	0	0	0
2000129	0105S	Triticale (Secano)	S	0	0	1612.2	2927.42	0	3309.26	3309.26	2842.57	3402.6	2918.94	3478.96	2800.14	2721.23	0.156166	0.159443	0.147961	0.188715	0.185346	0.154804	0.174972	0.204791	0.22092	0.198886	0.181481	0.1764	0	326.308	568.744	0	608.389	607.79	521.563	619.443	430.924	414.378	395.581	448.717	0	0	0	0	0	0	0	0	0
2000129	0108R	Maiz	R	12	8875.86	8994.47	9409.6	9869.2	9884.03	9884.03	10892.2	10892.2	9304.83	10378.2	10378.2	10378.2	0.16895	0.149064	0.160998	0.209968	0.182538	0.144484	0.18298	0.215418	0.234614	0.199488	0.170622	0.1729	991.388	983.319	1163.01	1741.53	1420.89	1390.19	1563.18	1899.58	2171.07	2560.73	2429.07	2613.71	460.553	512.118	117.076	0	115.45	115.838	0	0	0
2000129	0203S	Lentejas (Secano)	S	0	717.056	717.056	717.056	796.729	717.056	717.056	637.383	796.729	557.71	717.056	362.512	489.988	0.5414	0.629713	0.644947	0.594483	0.609698	0.609097	0.718606	0.756694	0.800406	0.551626	0.464812	0.5955	330.305	502.384	299.31	519.057	456.33	455.881	335.418	471.827	377.018	594.332	327.387	418.839	144.673	0	0	0	0	0	24.8945	99.5551	86.0419
2000129	0204S	Garbanzos (Secano)	S	0	831.324	748.191	997.589	914.456	748.191	748.191	831.324	914.456	706.625	820.517	415.662	586.083	0.636873	0.574725	0.594708	0.649413	0.659244	0.672021	0.628918	0.64824	0.658732	0.667067	0.551682	0.5891	412.585	284.895	391.465	483.979	270.337	262.72	317.44	468.153	379.328	535.093	266.421	371.061	211.377	161.155	0	0	141.407	153.582	0	0	80.4031
2000129	0205S	Guisantes secos (Secano)	S	0	1288.93	859.285	859.285	1074.11	1145.71	1145.71	1288.93	1074.11	955.239	1213.74	930.892	784.098	0.183	0.168498	0.164072	0.226191	0.218243	0.187869	0.2031	0.222072	0.268346	0.260067	0.255984	0.2289	320.066	193.457	186.883	342.891	293.006	246.017	298.272	254.292	287.967	403.067	296.707	257.261	245.306	186.54	95.1786	0	118.359	112.431	50.6398	54.7533	0
2000129	0303R	Patata	R	61	29723.7	32435.7	33992.1	29084.9	28862.6	31525.6	27393.3	29861.4	29597.6	29101.5	29904.6	32205.1	0.255555	0.189698	0.283946	0.251141	0.226568	0.150295	0.259555	0.211247	0.248208	0.348929	0.174342	0.2281	2126	2507.77	2782.25	2196.44	2688.7	2993.39	2611.9	3041.49	3513.04	3561.5	3549.71	3988.76	0	0	0	0	0	0	0	0	0
2000129	0402R	Remolacha	R	21	59027.8	65329.2	68396.3	65114.2	66156.1	69463.9	70290.9	90749.7	75002.9	63436.3	90232.8	77080.2	0.0700215	0.0607298	0.0463174	0.0360386	0.0372097	0.0371731	0.0358352	0.0309868	0.034739	0.0341005	0.034587	0.0381	1504.31	1650.87	1761.77	1706.7	1850.47	1892.12	2010.97	3056.05	3000.01	2548.11	3416.19	3194.18	0	6.56986	223.5	0	485.09	1443.1	1288.7	1123.75	982.056
2000129	0409R	Girasol	R	10	1835.71	1748.3	1713.33	1748.3	1748.3	1748.3	1582.21	1739.56	1800.75	1660.88	1660.88	1687.98	0.264769	0.278805	0.234343	0.404844	0.388245	0.225644	0.365759	0.377503	0.503866	0.340705	0.308668	0.364	270.018	290.082	224.13	410.782	336.936	317.975	361.426	443.739	605.151	613.221	645.774	761.772	273.084	149.528	65.8937	0	50.0776	57.2425	0	0	0
2000129	0409S	Girasol (Secano)	S	2	931.382	524.826	1079.22	983.125	887.03	960.95	938.774	1020.08	811.633	887.03	887.03	814.59	0.264769	0.278805	0.234343	0.404844	0.388245	0.225644	0.365759	0.377503	0.503866	0.340705	0.308668	0.364	170.045	91.2628	200.005	248.853	194.973	185.271	209.362	262.447	264.632	300.054	309.302	311.031	194.114	161.928	71.4688	0	63.5273	43.9063	0.650639	0	0
2000129	0606R	Alfalfa	R	37	37397.6	38228.7	39059.7	33242.3	37397.6	49863.5	49863.5	49863.5	52813.8	45542	47786.7	45118.2	0.136358	0.138243	0.117224	0.128445	0.167895	0.145286	0.116414	0.139242	0.167351	0.166491	0.148804	0.1513	434.829	519.917	505.058	518.331	676.536	1557.62	1109.2	844.843	1077.32	1148.51	294.505	1260.79	0	0	0	0	16.0774	19.829	0	0	0
2000129	0606S	Alfalfa (Secano)	S	1	21086	21813.1	21813.1	18177.6	18177.6	21813.1	21813.1	19995.3	17095.6	14538.4	18799.2	14905.6	0.136358	0.138243	0.117224	0.128445	0.167895	0.145286	0.116414	0.139242	0.167351	0.166491	0.148804	0.1513	482.076	478.135	458.96	370.502	168.959	213.117	288.788	257.371	236.668	259.262	1225.28	276.724	0	0	0	0	107.286	100.508	0	0	0
2000129	0701R	Col	R	0	37718.2	26059.9	13715.7	26059.9	26059.9	26059.9	26059.9	24002.5	24002.5	24002.5	20573.6	20573.6	0.290566	0.355545	0.318393	0.306995	0.300586	0.293176	0.250947	0.245312	0.304898	0.295672	0.271769	0.4429	3289.51	1693.37	959.184	1563.75	2364.26	2488.46	1524.52	2318.05	1912.72	2525.15	2208.42	1202.38	0	0	0	0	0	0	0	0	0
2000129	0723R	Ajo	R	0	8000	8000	7000	8000	0	10000	12000	12000	12000	12000	12000	12000	0.988823	1.13443	1.48269	1.35448	1.26403	1.20787	1.69567	1.86626	1.35089	1.17737	0.943399	1.3569	1965.84	1454.3	1666.1	2579.98	0	2544.3	3526.21	4091.47	3651.9	6236.14	5946.83	3769.18	246.377	0	0	0	0	0	0	0	0
2000129	0724R	Cebolla	R	0	24568.5	26057.5	24412.2	26057.5	26057.5	26057.5	26057.5	40947.5	40947.5	37225	40947.5	40947.5	0.18634	0.175012	0.19873	0.251551	0.164084	0.139574	0.248044	0.173705	0.202694	0.263377	0.181481	0.2555	2003.2	1952.92	2127.61	2244.34	2535.72	2116.64	2258.11	3888.07	3458.76	4706.95	5230.96	6087.91	0	0	0	0	0	0	0	0	0
2000129	1201R	Manzano	R	5	4795.08	4731.99	4744.61	4795.08	5381.85	4263.21	4276.46	4276.46	4313.05	3697.26	3728.81	4542.71	0.3622	0.279909	0.313305	0.388313	0.341306	0.261013	0.296591	0.302519	0.388573	0.418333	0.307462	0.3469	617.078	541.629	460.403	331.103	1243.08	977.769	997.758	953.562	1126.68	1121.22	1305.45	1132.58	0	0	0	0	0	0	0	0	0
2000129	1202R	Peral	R	0	8505.94	8985.15	8266.34	10422.8	8505.94	3686.31	3694.09	3694.09	3398.18	2864.47	3022.6	3920.52	0.544509	0.432065	0.4247	0.635142	0.538588	0.477539	0.469161	0.394089	0.459763	0.572388	0.446815	0.5097	1162.12	1169.19	1208.76	980.421	1411.09	790.469	667.238	866.993	865.973	716.676	706.848	855.687	0	115.232	0	238.224	0	0	0	0	0
2000129	1218S	Almendro (Secano)	S	0	0	167.525	83.7626	140.721	167.525	125.644	100.515	100.515	242.912	100.515	723.709	314.11	1.55314	1.60106	1.02979	0.91113	0.868761	0.617514	0.727415	0.6832	0.903617	1.49862	1.48392	1.8548	0	18.7823	9.01454	14.6707	17.0605	12.7828	10.2162	10.1364	24.8357	31.8881	306.248	31.8942	0	0	0	0	0	0	0	0	0
2000129	1302R	Vid	R	0	4123	3260	5675	5485	4650	4700	4560	5672	5000	5500	6727	5209	0.476906	0.557499	0.53334	0.563065	0.536381	0.568517	0.618308	0.596894	0.612917	0.619928	0.804649	0.7017	496.848	327.946	806.937	153.512	740.743	626.604	717.33	1153.97	1115.23	1544.19	1551.38	1117.06	0	0	0	0	0	56.1504	32.3418	0	6.49468
2000129	1302S	Vid (Secano)	S	71	4049.25	3118.21	5347.6	4061.03	3589.62	4026.66	3511.05	4596.28	3928.45	4284.95	5622.59	4031.57	0.476906	0.557499	0.53334	0.563065	0.536381	0.568517	0.618308	0.596894	0.612917	0.619928	0.804649	0.7017	1392.37	1344.32	2990.76	2408.79	1003.3	1324.15	1389.49	1859.48	1917.64	2068.89	2895.15	2261.31	0	0	0	0	0	0	0	0	0
2000130	0101R	Trigo	R	85	4819.81	3472.99	4054.94	4607.11	4430.14	3742.69	4424.19	4346.76	4255.73	4813.85	4054.94	4587.54	0.162961	0.154143	0.147643	0.215924	0.219547	0.160616	0.174271	0.228528	0.249617	0.214031	0.21084	0.2024	503.992	393.965	633.213	696.934	512.445	489.129	624.703	664.794	861.058	1004.13	875.094	1066.8	273.003	259.901	0	0	43.3779	51.0002	0	0	0
2000130	0101S	Trigo (Secano)	S	84	3101.15	2122.47	2675.77	3545.13	3463.33	2650.48	3227.58	3400.86	2851.28	3495.31	3099.67	2825.25	0.162961	0.154143	0.147643	0.215924	0.219547	0.160616	0.174271	0.228528	0.249617	0.214031	0.21084	0.2024	328.864	219.803	490.209	543.738	466.204	373.866	375.519	467.625	488.297	643.358	544.313	490.615	166.336	159.51	48.9778	0	40.8705	42.7841	0	0	0
2000130	0102R	Cebada	R	715	4611.63	3462.37	3938.12	4875.94	4670.87	3599.99	4584.29	4392.9	4247.08	5049.1	4301.76	4192.39	0.145456	0.146635	0.133229	0.18851	0.170202	0.124946	0.150448	0.193469	0.224847	0.181234	0.163886	0.174	470.658	319.966	329.469	711.472	455.076	422.25	646.919	656.854	840.81	1045.54	880.08	983.86	286.109	241.572	57.5417	0	58.1515	65.4687	0	0	0
2000130	0102S	Cebada (Secano)	S	159	2863.77	1663.75	2321.03	3547.12	3519.47	2393.71	2693.92	3025.72	2678.12	3389.91	2800.57	2532.76	0.145456	0.146635	0.133229	0.18851	0.170202	0.124946	0.150448	0.193469	0.224847	0.181234	0.163886	0.174	336.818	185.292	267.161	530.405	536.19	343.654	343.361	455.634	490.045	628.145	507.484	472.287	176.321	154.474	41.8553	0	40.8404	46.9423	0	0	0
[truncated: 3,715 more rows]
[truncated: 39 more columns]
