# Supplementary material for: Actionable human–water system modelling under uncertainty
Source: Copernicus journal article supplement (doi:10.5194/hess-28-4501-2024), 2024-10-14
Supplement: Supplementary file 1 [file hess-28-4501-2024-supplement.zip]

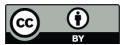

## *Supplement of*

# **Actionable human–water system modelling under uncertainty**

**Laura Gil-García et al.**

*Correspondence to:* Laura Gil-García (lauragil\_9@usal.es)

- [hess-28-4501-2024-supplement-title-page.pdf](#)
- [Table S1.xlsx](#)
- [Table S2.xlsx](#)
- [Table S3.xlsm](#)

The copyright of individual parts of the supplement might differ from the article licence.
